# Supplementary material for: circRNA expression profiling of colon tissue from mesalazine-treated mouse of inflammatory bowel disease reveals an important circRNA-miRNA-mRNA pathway
Source: Aging (Albany NY). 2021 Mar 26;13(7):10187–207. doi: 10.18632/aging.202780 (PMC8064189; doi:10.18632/aging.202780)
Supplement: Supplementary Table 1 [file aging-13-202780-s002.xlsx]

## Sheet: Sheet1
Supplementary Table 1. The full profiling of differentially expressed circRNA expression profiling .																													Supplementary Table 1. The full profiling of differentially expressed circRNA expression profiling (separate excel file).
Differentially expressed circRNAs for: up_DSS_vs_control Fold Change cut-off: 2.0 P-value cut-off: 0.05 Column A: CircRNAID, the ID of the identified circRNA by DCC. Column B ~ G: edgeR results for differentially expressed circRNAs. Column H ~ M: junction reads, the junction read number of each sample. Column N ~ S: logCPM by edgeR. Column S ~ W: the coordinates of circRNA. Column X: circBaseID, …
	M_vs_N up regulated circRNAs
	P-value, Fold change and Regulation						junction reads						logCPM by edgeR						Annotations
CircRNAID	logFC	logCPM	LR	PValue	FDR	regulation	DSS_1	DSS_2	DSS_3	control_1	control_2	control_3	DSS_1	DSS_2	DSS_3	control_1	control_2	control_3	chrom	txStart	txEnd	strand	circBaseID	source	best_transcript	GeneName	Catalog	predicted_sequence_length
chr10:115386962-115390436+	4.78596	10.6475	9.8033	0.00174199	0.524815	up	2	5	2	0	0	0	9.98053	10.7647	10.3404	6.58545	6.58545	6.58545	chr10	96128942	96134132	-		youxintian_mouse28026	NM_144910	Cnot6l	exonic	395
chr7:116359996-116368189-	4.8826	10.2384	9.09119	0.00256843	0.524815	up	5	5	0	0	0	0	11.2177	10.7647	6.58545	6.58545	6.58545	6.58545	chr7	116359995	116368189	-	7_123511703_123503510_-8193|18.58|20|100	youxintian_mouse28026	NM_011083	Pik3c2a	exonic	810
chr13:35815909-35816575+	4.64623	10.5529	8.86787	0.00290234	0.524815	up	4	3	1	0	0	0	10.9103	10.0798	9.44345	6.58545	6.58545	6.58545	chr13	35815908	35816575	+	mm9_circ_003780	circBase	NM_009881	Cdyl	exonic	667
chr16:93847288-93853217+	4.38722	10.5555	7.51842	0.00610711	0.524815	up	3	0	3	0	0	0	10.519	6.58545	10.8892	6.58545	6.58545	6.58545	chr16	93847287	93853217	+		novel	NM_001045529	Morc3	sense overlapping	5930
chr5:137435628-137438645-	4.53626	10.1488	7.4035	0.00650973	0.524815	up	1	6	1	0	0	0	9.11153	11.0144	9.44345	6.58545	6.58545	6.58545	chr5	137435627	137438645	-		novel	NM_011741	Zan	exonic	898
chr18:32005431-32013445-	4.29279	10.0699	6.39258	0.0114598	0.524815	up	1	6	0	0	0	0	9.11153	11.0144	6.58545	6.58545	6.58545	6.58545	chr18	32005430	32013445	-		novel	NM_032394	Myo7b	exonic	564
chr5:144280820-144285595-	4.14385	10.0754	5.88862	0.015239	0.524815	up	2	4	0	0	0	0	9.98053	10.4625	6.58545	6.58545	6.58545	6.58545	chr5	144280819	144285595	-	5_145046464_145041689_-4775|17.11|2|3	youxintian_mouse28026	NM_025833	Baiap2l1	exonic	607
chr7:81893799-81905636-	4.06502	10.1657	5.84343	0.0156353	0.524815	up	0	6	0	0	0	0	6.58545	11.0144	6.58545	6.58545	6.58545	6.58545	chr7	81893798	81905636	-	mm9_circ_002658	circBase	NM_013886	Hdgfrp3	exonic	519
chr12:84171460-84174423-	4.05566	10.2061	5.72038	0.0167691	0.524815	up	3	1	1	0	0	0	10.519	8.73056	9.44345	6.58545	6.58545	6.58545	chr12	85863563	85879475	+		youxintian_mouse28026	NM_001081423	Ttll5	exonic	457
chr16:24761593-24762276+	4.05067	10.0916	5.52728	0.0187222	0.524815	up	1	2	2	0	0	0	9.11153	9.5575	10.3404	6.58545	6.58545	6.58545	chr16	24761592	24762276	+	16_24762362_24761679_-683|23.08|3|3	youxintian_mouse28026	NM_178665	Lpp	exonic	684
chr17:73906010-73907745-	3.96281	10.0945	5.32118	0.0210677	0.524815	up	1	3	1	0	0	0	9.11153	10.0798	9.44345	6.58545	6.58545	6.58545	chr17	73906009	73907745	-	17_74257085_74255350_-1735|17.39|7|10	youxintian_mouse28026	NM_011723	Xdh	exonic	434
chr1:22346293-22393948-	4.0178	10.0056	5.31985	0.0210838	0.524815	up	4	1	0	0	0	0	10.9103	8.73056	6.58545	6.58545	6.58545	6.58545	chr1	22346292	22393948	-	mm9_circ_003161	circBase	NM_053270	Rims1	sense overlapping	47656
chr1:89627761-89634294+	3.96162	10.0504	5.24315	0.0220334	0.524815	up	1	3	1	0	0	0	9.11153	10.0798	9.44345	6.58545	6.58545	6.58545	chr1	89627760	89634294	+	mm9_circ_017649	circBase	NM_178119	Agap1	exonic	363
chr16:14138343-14140372-	3.95905	9.98768	5.06815	0.0243694	0.524815	up	1	3	1	0	0	0	9.11153	10.0798	9.44345	6.58545	6.58545	6.58545	chr16	14138342	14140372	-	mm9_circ_006366	circBase	NM_001081154	Marf1	exonic	369
chr1:156900586-156907778-	3.96132	9.98232	4.87376	0.0272681	0.524815	up	0	0	4	0	0	0	6.58545	6.58545	11.2859	6.58545	6.58545	6.58545	chr1	156900585	156907778	-	mm9_circ_015637	circBase	NR_027640	Ralgps2	exonic	296
chr19:37325148-37330612-	3.84111	10.0775	4.82739	0.0280111	0.524815	up	0	1	3	0	0	0	6.58545	8.73056	10.8892	6.58545	6.58545	6.58545	chr19	37325147	37330612	-	19_37405102_37399638_-5464|17.00|17|59	youxintian_mouse28026	uc008hil.1	Ide	exonic	563
chr5:106618071-106619642-	3.73877	10.2204	4.77164	0.0289323	0.524815	up	0	2	2	0	0	0	6.58545	9.5575	10.3404	6.58545	6.58545	6.58545	chr5	106618070	106619642	-	mm9_circ_001406	circBase	NM_026856	Zfp644	sense overlapping	1572
chr7:141271549-141271734-	3.76134	10.105	4.70129	0.03014	0.524815	up	4	0	0	0	0	0	10.9103	6.58545	6.58545	6.58545	6.58545	6.58545	chr7	141271548	141271734	-		novel	ENSMUST00000080654	Cdhr5	intronic	186
chr18:36673328-36673629-	3.76164	10.0897	4.68452	0.0304355	0.524815	up	4	0	0	0	0	0	10.9103	6.58545	6.58545	6.58545	6.58545	6.58545	chr18	36673327	36673629	-		novel	ENSMUST00000001415	Apbb3	intronic	302
chr11:70874746-70884968+	2.03241	11.0146	4.68215	0.0304776	0.524815	up	7	4	4	0	1	3	11.6864	10.4625	11.2859	6.58545	8.98942	10.1502	chr11	70874745	70884968	+	mm9_circ_001848	circBase	NM_019400	Rabep1	exonic	333
chr9:52143675-52144426-	3.80182	9.99795	4.62296	0.0315468	0.524815	up	1	1	2	0	0	0	9.11153	8.73056	10.3404	6.58545	6.58545	6.58545	chr9	52143674	52144426	-	9_51952531_51951780_-751|23.87|12|25	youxintian_mouse28026	NM_001162921	Zc3h12c	exonic	752
chr6:116042871-116043805-	3.92991	9.94549	4.55908	0.0327447	0.524815	up	1	0	3	0	0	0	9.11153	6.58545	10.8892	6.58545	6.58545	6.58545	chr6	116042870	116043805	-	mm9_circ_003215	circBase	NM_177412	Tmcc1	exonic	935
chr4:65155617-65156679+	3.56586	10.2675	4.4608	0.0346813	0.524815	up	0	4	0	0	0	0	6.58545	10.4625	6.58545	6.58545	6.58545	6.58545	chr4	65155616	65156679	+		novel	NM_021362	Pappa	exonic	1063
chr10:62770855-62772065-	3.65326	10.0573	4.41353	0.035655	0.524815	up	2	2	0	0	0	0	9.98053	9.5575	6.58545	6.58545	6.58545	6.58545	chr10	62770854	62772065	-	10_62234813_62233603_-1210|15.40|9|15	youxintian_mouse28026	NM_026201	Ccar1	exonic	292
chr18:69564034-69564684+	3.69746	9.99387	4.39223	0.036103	0.524815	up	1	2	1	0	0	0	9.11153	9.5575	9.44345	6.58545	6.58545	6.58545	chr18	69564033	69564684	+	mm9_circ_007569	circBase	NM_013685	Tcf4	exonic	180
chr9:95761313-95776608-	3.95025	9.91275	4.38214	0.0363174	0.524815	up	1	3	1	0	0	0	9.11153	10.0798	9.44345	6.58545	6.58545	6.58545	chr9	95761312	95776608	-		novel	NM_001033210	Pls1	exonic	887
chr9:100776756-100803354+	3.59977	10.0737	4.32553	0.0375447	0.524815	up	1	3	0	0	0	0	9.11153	10.0798	6.58545	6.58545	6.58545	6.58545	chr9	100776755	100803354	+	9_100703773_100677175_-26598|21.51|20|102	youxintian_mouse28026	NM_009282	Stag1	exonic	508
chr7:98243949-98266247-	3.59909	10.0649	4.31352	0.0378107	0.524815	up	1	3	0	0	0	0	9.11153	10.0798	6.58545	6.58545	6.58545	6.58545	chr7	98243948	98266247	-	mm9_circ_016550	circBase	NM_025408	Acer3	exonic	394
chr9:3441055-3450151+	3.5477	10.0941	4.24405	0.0393881	0.524815	up	0	4	0	0	0	0	6.58545	10.4625	6.58545	6.58545	6.58545	6.58545	chr9	3441054	3450151	+	9_3450151_3441055_-9096|21.53|16|32	youxintian_mouse28026	NM_027545	Cwf19l2	exonic	433
chr14:7756669-7766248-	3.82728	9.92368	4.18836	0.0407025	0.524815	up	3	0	1	0	0	0	10.519	6.58545	9.44345	6.58545	6.58545	6.58545	chr14	7756668	7766248	-	14_8598762_8589183_-9579|12.65|5|18	youxintian_mouse28026	uc007sei.1	AK041589	sense overlapping	9580
chr5:31901055-31906368+	3.8205	9.92312	4.16314	0.0413127	0.524815	up	1	1	2	0	0	0	9.11153	8.73056	10.3404	6.58545	6.58545	6.58545	chr5	31901054	31906368	+	5_32208741_32203428_-5313|17.87|13|22	youxintian_mouse28026	NM_144541	Bre	sense overlapping	5314
chr5:137150930-137151103-	3.58753	9.97763	4.10464	0.0427657	0.524815	up	1	3	0	0	0	0	9.11153	10.0798	6.58545	6.58545	6.58545	6.58545	chr5	137150929	137151103	-		novel			intergenic	174
chr2:3496564-3502785-	4.00962	9.87118	4.10146	0.0428461	0.524815	up	2	2	1	0	0	0	9.98053	9.5575	9.44345	6.58545	6.58545	6.58545	chr2	3496563	3502785	-	2_3420057_3413836_-6221|15.15|19|82	youxintian_mouse28026	NM_015765	Hspa14	exonic	669
chr5:97938087-97980034-	3.64194	9.94859	4.04237	0.0443715	0.524815	up	2	2	0	0	0	0	9.98053	9.5575	6.58545	6.58545	6.58545	6.58545	chr5	97938086	97980034	-	5_98409053_98367106_-41947|21.34|6|63	youxintian_mouse28026	NM_133738	Antxr2	exonic	789
chr3:88999728-89007877+	3.53087	9.98524	4.03527	0.0445585	0.524815	up	0	4	0	0	0	0	6.58545	10.4625	6.58545	6.58545	6.58545	6.58545	chr3	88999727	89007877	+	3_88811799_88803650_-8149|17.55|12|22	youxintian_mouse28026	NM_138679	Ash1l	sense overlapping	8150
chr6:35051062-35080226-	3.76993	9.91768	4.028	0.0447509	0.524815	up	4	0	0	0	0	0	10.9103	6.58545	6.58545	6.58545	6.58545	6.58545	chr6	35051061	35080226	-	6_35030226_35001062_-29164|21.29|4|6	youxintian_mouse28026	NM_016877	Cnot4	exonic	1719
chr5:57913156-57942262+	3.63245	9.9467	4.00715	0.0453078	0.524815	up	0	3	1	0	0	0	6.58545	10.0798	9.44345	6.58545	6.58545	6.58545	chr5	57913155	57942262	+	5_58333501_58304395_-29106|18.35|12|61	youxintian_mouse28026	NM_001122758	Pcdh7	sense overlapping	29107
chr1:139040000-139042043+	3.94944	9.86417	3.99024	0.0457645	0.524815	up	3	2	0	0	0	0	10.519	9.5575	6.58545	6.58545	6.58545	6.58545	chr1	139039999	139042043	+	1_140938620_140936577_-2043|18.85|12|182	youxintian_mouse28026	NM_181347	Dennd1b	exonic	170
chr11:85326864-85339796+	3.89884	9.88013	3.86469	0.0493122	0.524815	up	0	1	3	0	0	0	6.58545	8.73056	10.8892	6.58545	6.58545	6.58545	chr11	85326863	85339796	+	11_85153298_85140366_-12932|15.27|15|24	youxintian_mouse28026	NM_016910	Ppm1d	exonic	788
chr4:46460090-46463929+	3.97287	9.84748	3.86356	0.0493455	0.524815	up	1	0	3	0	0	0	9.11153	6.58545	10.8892	6.58545	6.58545	6.58545	chr4	46460089	46463929	+		novel	NM_130889	Anp32b	exonic	273
