# Supplementary material for: circRNA expression profiling of colon tissue from mesalazine-treated mouse of inflammatory bowel disease reveals an important circRNA-miRNA-mRNA pathway
Source: Aging (Albany NY). 2021 Mar 26;13(7):10187–207. doi: 10.18632/aging.202780 (PMC8064189; doi:10.18632/aging.202780)
Supplement: Supplementary Table 2 [file aging-13-202780-s003.xlsx]

## Sheet: Sheet1
Supplementary Table 2. The full profiling of all circRNA .
circRNAs identified by DCC Column A: CircRNAID, the ID of the identified circRNA by DCC. Column B ~ J: junction reads, the junction read number of each sample. Column K ~ S: logCPM by edgeR. Column T ~ W: the coordinates of circRNA. Column X: circBaseID, the identifier of circBase (http://www.circbase.org). Column Y: source, the source of the circRNA, including circBase, Guojunjie2014,... Column …
	junction reads									logCPM by edgeR									Annotations
CircRNAID	DSS_1	DSS_2	DSS_3	control_1	control_2	control_3	DSS+5ASA_1	DSS+5ASA_2	DSS+5ASA_3	DSS_1	DSS_2	DSS_3	control_1	control_2	control_3	DSS+5ASA_1	DSS+5ASA_2	DSS+5ASA_3	chrom	txStart	txEnd	strand	circBaseID	source	best_transcript	GeneName	Catalog	predicted_sequence_length
chr1:5089009-5098133+	0	0	1	1	0	0	1	0	3	6.58545	6.58545	9.44345	9.07415	6.58545	6.58545	8.8986	6.58545	10.3337	chr1	5089008	5098133	+	1_5088214_5079090_-9124|18.35|16|35	youxintian_mouse28026	NM_133826	Atp6v1h	exonic	412
chr1:5089009-5101123+	1	1	0	0	1	1	0	2	0	9.11153	8.73056	6.58545	6.58545	8.98942	8.79054	6.58545	9.73278	6.58545	chr1	5089008	5101123	+	1_5091204_5079090_-12114|18.58|12|17	youxintian_mouse28026	NM_133826	Atp6v1h	exonic	466
chr1:5089009-5117487+	0	0	0	0	0	0	0	0	0	6.58545	6.58545	6.58545	6.58545	6.58545	6.58545	6.58545	6.58545	6.58545	chr1	5089008	5117487	+	1_5107568_5079090_-28478|19.57|3|3	youxintian_mouse28026	NM_133826	Atp6v1h	exonic	564
chr1:5093363-5133262+	0	2	0	1	0	0	0	0	0	6.58545	9.5575	6.58545	9.07415	6.58545	6.58545	6.58545	6.58545	6.58545	chr1	5093362	5133262	+	1_5123343_5083444_-39899|11.34|16|39	youxintian_mouse28026	NM_133826	Atp6v1h	exonic	833
chr1:5095615-5124469+	0	1	0	0	0	0	0	0	0	6.58545	8.73056	6.58545	6.58545	6.58545	6.58545	6.58545	6.58545	6.58545	chr1	5095614	5124469	+	1_5114550_5085696_-28854|21.61|8|14	youxintian_mouse28026	NM_133826	Atp6v1h	exonic	564
chr1:5095615-5135937+	0	1	0	0	0	0	2	0	0	6.58545	8.73056	6.58545	6.58545	6.58545	6.58545	9.74562	6.58545	6.58545	chr1	5095614	5135937	+	1_5126018_5085696_-40322|20.68|9|13	youxintian_mouse28026	NM_133826	Atp6v1h	exonic	869
chr1:6245158-6261095+	0	0	0	0	0	0	2	0	0	6.58545	6.58545	6.58545	6.58545	6.58545	6.58545	9.74562	6.58545	6.58545	chr1	6245157	6261095	+		novel	NM_009826	Rb1cc1	exonic	2620
chr1:7120194-7120615+	2	1	1	0	0	1	2	1	1	9.98053	8.73056	9.44345	6.58545	6.58545	8.79054	9.74562	8.88706	8.94889	chr1	7120193	7120615	+	1_7110696_7110275_-421|18.24|23|727	youxintian_mouse28026	NM_183028	Pcmtd1	exonic	422
chr1:7120194-7147739+	1	1	0	0	0	0	1	1	0	9.11153	8.73056	6.58545	6.58545	6.58545	6.58545	8.8986	8.88706	6.58545	chr1	7120193	7147739	+	1_7137820_7110275_-27545|19.04|16|32	youxintian_mouse28026	NM_183028	Pcmtd1	exonic	525
chr1:9880332-9889025+	0	0	0	0	0	0	2	0	0	6.58545	6.58545	6.58545	6.58545	6.58545	6.58545	9.74562	6.58545	6.58545	chr1	9880331	9889025	+		novel	NM_133220	Sgk3	exonic	763
chr1:10064333-10127563+	0	0	0	0	0	0	0	0	0	6.58545	6.58545	6.58545	6.58545	6.58545	6.58545	6.58545	6.58545	6.58545	chr1	10064332	10127563	+		novel	NM_026493	Cspp1	exonic	2716
chr1:10082253-10096013+	0	0	1	1	1	1	0	0	0	6.58545	6.58545	9.44345	9.07415	8.98942	8.79054	6.58545	6.58545	6.58545	chr1	10082252	10096013	+	1_10086094_10072334_-13760|10.11|6|7	youxintian_mouse28026	NM_026493	Cspp1	exonic	849
chr1:10088051-10108481+	0	0	0	0	0	0	0	0	0	6.58545	6.58545	6.58545	6.58545	6.58545	6.58545	6.58545	6.58545	6.58545	chr1	10088050	10108481	+		novel	NM_026493	Cspp1	exonic	757
chr1:10198843-10216559-	0	0	3	0	0	0	0	0	0	6.58545	6.58545	10.8892	6.58545	6.58545	6.58545	6.58545	6.58545	6.58545	chr1	10198842	10216559	-		novel	NM_001102430	Arfgef1	exonic	1204
chr1:10204491-10204766-	0	0	0	0	0	0	0	0	0	6.58545	6.58545	6.58545	6.58545	6.58545	6.58545	6.58545	6.58545	6.58545	chr1	10204490	10204766	-		novel	ENSMUST00000088615	Arfgef1	intronic	276
chr1:10477025-10488949-	0	0	0	0	0	0	2	0	0	6.58545	6.58545	6.58545	6.58545	6.58545	6.58545	9.74562	6.58545	6.58545	chr1	10477024	10488949	-	1_10479030_10467106_-11924|15.86|5|10	youxintian_mouse28026	NM_177834	Cpa6	exonic	447
chr1:11123121-11170791+	0	0	0	0	0	0	0	0	0	6.58545	6.58545	6.58545	6.58545	6.58545	6.58545	6.58545	6.58545	6.58545	chr1	11123120	11170791	+		novel	NM_029525	Prex2	exonic	1807
chr1:11181855-11200052+	0	0	0	0	0	0	0	0	0	6.58545	6.58545	6.58545	6.58545	6.58545	6.58545	6.58545	6.58545	6.58545	chr1	11181854	11200052	+		novel	NM_029525	Prex2	exonic	838
chr1:11193513-11208655+	0	0	0	0	0	1	0	3	0	6.58545	6.58545	6.58545	6.58545	6.58545	8.79054	6.58545	10.2624	6.58545	chr1	11193512	11208655	+	1_11198736_11183594_-15142|20.26|6|7	youxintian_mouse28026	NM_029525	Prex2	exonic	507
chr1:13221307-13224713-	0	1	3	0	1	0	0	1	0	6.58545	8.73056	10.8892	6.58545	8.98942	6.58545	6.58545	8.88706	6.58545	chr1	13221306	13224713	-	mm9_circ_016598	circBase	NM_008678	Ncoa2	exonic	278
chr1:13221307-13286025-	0	2	0	0	0	1	0	0	2	6.58545	9.5575	6.58545	6.58545	6.58545	8.79054	6.58545	6.58545	9.80143	chr1	13221306	13286025	-	mm9_circ_015350	circBase	NM_008678	Ncoa2	exonic	335
chr1:13638231-13650884-	0	1	0	0	0	0	0	0	1	6.58545	8.73056	6.58545	6.58545	6.58545	6.58545	6.58545	6.58545	8.94889	chr1	13638230	13650884	-	1_13640965_13628312_-12653|21.21|7|7	youxintian_mouse28026	NM_145381	Lactb2	exonic	470
chr1:15831507-15843164+	0	0	0	0	0	0	0	0	0	6.58545	6.58545	6.58545	6.58545	6.58545	6.58545	6.58545	6.58545	6.58545	chr1	15831506	15843164	+		novel	NM_009352	Terf1	sense overlapping	11658
chr1:16102808-16103193-	1	0	0	1	1	0	3	0	0	9.11153	6.58545	6.58545	9.07415	8.98942	6.58545	10.2758	6.58545	6.58545	chr1	16102807	16103193	-		novel	NM_011291	Rpl7	sense overlapping	386
chr1:16440323-16486150-	0	2	0	0	0	0	0	1	0	6.58545	9.5575	6.58545	6.58545	6.58545	6.58545	6.58545	8.88706	6.58545	chr1	16440322	16486150	-	1_16476231_16430404_-45827|14.38|18|50	youxintian_mouse28026	NM_025303	Stau2	exonic	427
chr1:16440323-16509408-	0	4	0	0	0	1	2	0	0	6.58545	10.4625	6.58545	6.58545	6.58545	8.79054	9.74562	6.58545	6.58545	chr1	16440322	16509408	-	mm9_circ_006026	circBase	NM_025303	Stau2	exonic	494
chr1:16463035-16486150-	0	0	0	0	0	0	0	0	0	6.58545	6.58545	6.58545	6.58545	6.58545	6.58545	6.58545	6.58545	6.58545	chr1	16463034	16486150	-	1_16476231_16453116_-23115|18.01|2|3	youxintian_mouse28026	NM_025303	Stau2	exonic	291
chr1:16463035-16509408-	2	2	0	0	0	1	0	0	0	9.98053	9.5575	6.58545	6.58545	6.58545	8.79054	6.58545	6.58545	6.58545	chr1	16463034	16509408	-	mm9_circ_005382	circBase	NM_025303	Stau2	exonic	358
chr1:16581927-16602353-	0	0	0	0	1	0	0	1	0	6.58545	6.58545	6.58545	6.58545	8.98942	6.58545	6.58545	8.88706	6.58545	chr1	16581926	16602353	-	1_16592434_16572008_-20426|16.47|14|34	youxintian_mouse28026	NM_025773	Ube2w	exonic	427
chr1:22346293-22393948-	4	1	0	0	0	0	0	2	0	10.9103	8.73056	6.58545	6.58545	6.58545	6.58545	6.58545	9.73278	6.58545	chr1	22346292	22393948	-	mm9_circ_003161	circBase	NM_053270	Rims1	sense overlapping	47656
chr1:22373344-22397563-	0	0	0	0	0	0	1	0	0	6.58545	6.58545	6.58545	6.58545	6.58545	6.58545	8.8986	6.58545	6.58545	chr1	22373343	22397563	-	1_22387644_22363425_-24219|20.68|15|113	youxintian_mouse28026	NM_053270	Rims1	exonic	393
chr1:24044114-24086611-	0	0	0	2	0	0	2	1	0	6.58545	6.58545	6.58545	9.93954	6.58545	6.58545	9.74562	8.88706	6.58545	chr1	24044113	24086611	-	1_24093450_24050953_-42497|20.66|19|90	youxintian_mouse28026	NM_026604	Fam135a	exonic	1160
chr1:24085411-24086611-	0	1	0	0	0	1	0	2	1	6.58545	8.73056	6.58545	6.58545	6.58545	8.79054	6.58545	9.73278	8.94889	chr1	24085410	24086611	-	1_24093450_24092250_-1200|17.68|25|256	youxintian_mouse28026	NM_026604	Fam135a	exonic	208
chr1:24613447-24613622-	1	2	0	0	1	1	1	0	1	9.11153	9.5575	6.58545	6.58545	8.98942	8.79054	8.8986	6.58545	8.94889	chr1	24613446	24613622	-		novel			intergenic	176
chr1:24614136-24614371-	2	0	0	0	0	0	0	0	0	9.98053	6.58545	6.58545	6.58545	6.58545	6.58545	6.58545	6.58545	6.58545	chr1	24614135	24614371	-		novel	uc007ams.1	Atpase6	sense overlapping	236
chr1:25126641-25131401-	0	0	0	0	0	0	0	0	0	6.58545	6.58545	6.58545	6.58545	6.58545	6.58545	6.58545	6.58545	6.58545	chr1	25126640	25131401	-	mm9_circ_002776	circBase	NM_175642	Adgrb3	exonic	288
chr1:30808723-30811967-	0	2	0	0	0	0	0	0	0	6.58545	9.5575	6.58545	6.58545	6.58545	6.58545	6.58545	6.58545	6.58545	chr1	30808722	30811967	-	1_30868812_30865568_-3244|20.70|3|3	youxintian_mouse28026	NM_001081080	Phf3	exonic	434
chr1:30820081-30824519-	0	0	0	1	0	1	0	0	0	6.58545	6.58545	6.58545	9.07415	6.58545	8.79054	6.58545	6.58545	6.58545	chr1	30820080	30824519	-	1_30881364_30876926_-4438|22.89|3|5	youxintian_mouse28026	NM_001081080	Phf3	exonic	796
chr1:30837105-30863255-	0	0	0	0	0	0	0	0	0	6.58545	6.58545	6.58545	6.58545	6.58545	6.58545	6.58545	6.58545	6.58545	chr1	30837104	30863255	-	1_30920100_30893950_-26150|19.68|9|12	youxintian_mouse28026	uc007anf.1	Phf3	intronic	26151
chr1:34087333-34088373-	0	0	0	0	0	0	0	0	2	6.58545	6.58545	6.58545	6.58545	6.58545	6.58545	6.58545	6.58545	9.80143	chr1	34087332	34088373	-		novel	NM_133833	Dst	antisense	1041
chr1:34171173-34197334+	0	2	0	0	0	0	0	0	0	6.58545	9.5575	6.58545	6.58545	6.58545	6.58545	6.58545	6.58545	6.58545	chr1	34171172	34197334	+		novel	NM_010081	Dst	sense overlapping	26162
chr1:34197201-34217872+	0	0	0	0	0	0	0	0	0	6.58545	6.58545	6.58545	6.58545	6.58545	6.58545	6.58545	6.58545	6.58545	chr1	34197200	34217872	+	1_34274717_34254046_-20671|15.69|2|2	youxintian_mouse28026	NM_133833	Dst	exonic	2542
chr1:36074253-36084890+	0	0	0	0	0	0	0	0	0	6.58545	6.58545	6.58545	6.58545	6.58545	6.58545	6.58545	6.58545	6.58545	chr1	36074252	36084890	+		novel	ENSMUST00000088174	Hs6st1	intronic	10638
chr1:36182470-36202878-	0	0	0	0	0	0	0	0	0	6.58545	6.58545	6.58545	6.58545	6.58545	6.58545	6.58545	6.58545	6.58545	chr1	36182469	36202878	-		novel	NM_198899	Uggt1	exonic	1043
chr1:36195850-36197635-	0	0	0	0	0	0	0	0	0	6.58545	6.58545	6.58545	6.58545	6.58545	6.58545	6.58545	6.58545	6.58545	chr1	36195849	36197635	-	1_36254480_36252695_-1785|18.62|8|15	youxintian_mouse28026	NM_198899	Uggt1	exonic	243
chr1:37377578-37380060+	0	1	2	0	0	2	0	0	0	6.58545	8.73056	10.3404	6.58545	6.58545	9.62495	6.58545	6.58545	6.58545	chr1	37377577	37380060	+	1_37436905_37434423_-2482|16.11|3|3	youxintian_mouse28026	NM_030266	Inpp4a	exonic	542
chr1:37456590-37464534-	0	1	1	0	0	0	2	0	1	6.58545	8.73056	9.44345	6.58545	6.58545	6.58545	9.74562	6.58545	8.94889	chr1	37456589	37464534	-		novel	NM_173870	Mgat4a	exonic	305
chr1:37464421-37498740-	0	2	0	0	0	0	0	0	0	6.58545	9.5575	6.58545	6.58545	6.58545	6.58545	6.58545	6.58545	6.58545	chr1	37464420	37498740	-		novel	NM_173870	Mgat4a	exonic	604
chr1:37490260-37498740-	1	6	0	5	2	4	2	6	5	9.11153	11.0144	6.58545	11.1742	9.84625	10.5344	9.74562	11.2049	11.0271	chr1	37490259	37498740	-	mm9_circ_005108	circBase	NM_173870	Mgat4a	exonic	443
chr1:37490260-37536404-	0	0	2	0	1	0	0	0	5	6.58545	6.58545	10.3404	6.58545	8.98942	6.58545	6.58545	6.58545	11.0271	chr1	37490259	37536404	-	1_37593249_37547105_-46144|19.70|4|12	youxintian_mouse28026	NM_173870	Mgat4a	exonic	809
chr1:37536039-37536404-	0	0	0	1	0	0	2	0	0	6.58545	6.58545	6.58545	9.07415	6.58545	6.58545	9.74562	6.58545	6.58545	chr1	37536038	37536404	-		novel	NM_173870	Mgat4a	exonic	366
chr1:38017806-38022314+	0	0	0	2	1	1	0	1	0	6.58545	6.58545	6.58545	9.93954	8.98942	8.79054	6.58545	8.88706	6.58545	chr1	38017805	38022314	+	1_38079159_38074651_-4508|15.63|2|4	youxintian_mouse28026	NM_198303	Eif5b	exonic	1250
chr1:38053616-38054865-	0	0	0	0	0	0	0	0	0	6.58545	6.58545	6.58545	6.58545	6.58545	6.58545	6.58545	6.58545	6.58545	chr1	38053615	38054865	-		novel	NM_019570	Rev1	exonic	593
chr1:38053616-38085652-	0	1	1	0	0	1	1	3	2	6.58545	8.73056	9.44345	6.58545	6.58545	8.79054	8.8986	10.2624	9.80143	chr1	38053615	38085652	-	mm9_circ_016062	circBase	NM_019570	Rev1	exonic	2431
chr1:38083704-38108467-	0	0	0	0	0	0	0	0	2	6.58545	6.58545	6.58545	6.58545	6.58545	6.58545	6.58545	6.58545	9.80143	chr1	38083703	38108467	-	1_38165312_38140549_-24763|17.40|4|5	youxintian_mouse28026	NM_019570	Rev1	exonic	1442
chr1:38107568-38108467-	0	0	0	1	0	1	0	1	0	6.58545	6.58545	6.58545	9.07415	6.58545	8.79054	6.58545	8.88706	6.58545	chr1	38107567	38108467	-	mm9_circ_012324	circBase	NM_019570	Rev1	exonic	191
chr1:38534906-38536946-	0	0	0	0	1	2	0	0	0	6.58545	6.58545	6.58545	6.58545	8.98942	9.62495	6.58545	6.58545	6.58545	chr1	38534905	38536946	-	1_38593791_38591751_-2040|19.32|17|86	youxintian_mouse28026	NM_001290814	Aff3	exonic	820
chr1:39287468-39300733+	0	0	0	0	0	1	1	0	1	6.58545	6.58545	6.58545	6.58545	6.58545	8.79054	8.8986	6.58545	8.94889	chr1	39287467	39300733	+	1_39357578_39344313_-13265|20.85|12|21	youxintian_mouse28026	NM_008719	Npas2	exonic	331
chr1:39564048-39565332-	1	0	2	0	0	0	0	0	0	9.11153	6.58545	10.3404	6.58545	6.58545	6.58545	6.58545	6.58545	6.58545	chr1	39564047	39565332	-	1_39622177_39620893_-1284|19.08|8|9	youxintian_mouse28026	NM_001033135	Rnf149	exonic	320
chr1:40225230-40293357+	0	0	0	0	0	0	0	0	0	6.58545	6.58545	6.58545	6.58545	6.58545	6.58545	6.58545	6.58545	6.58545	chr1	40225229	40293357	+		novel	NM_008362	Il1r1	sense overlapping	68128
chr1:40726208-40744005+	0	0	0	0	1	2	0	0	0	6.58545	6.58545	6.58545	6.58545	8.98942	9.62495	6.58545	6.58545	6.58545	chr1	40726207	40744005	+		novel	NM_001033289	Slc9a2	exonic	672
chr1:43067474-43075952-	0	2	0	0	0	0	0	0	0	6.58545	9.5575	6.58545	6.58545	6.58545	6.58545	6.58545	6.58545	6.58545	chr1	43067473	43075952	-	1_43132797_43124319_-8478|19.51|8|12	youxintian_mouse28026	NM_001013025	Tgfbrap1	exonic	1052
chr1:43790464-43807377-	0	0	0	0	0	2	0	0	0	6.58545	6.58545	6.58545	6.58545	6.58545	9.62495	6.58545	6.58545	6.58545	chr1	43790463	43807377	-		novel	NM_026430	Uxs1	exonic	363
chr1:43797245-43807377-	0	0	0	0	3	1	0	0	2	6.58545	6.58545	6.58545	6.58545	10.3801	8.79054	6.58545	6.58545	9.80143	chr1	43797244	43807377	-		novel	NM_026430	Uxs1	exonic	182
chr1:43960084-43973520+	0	2	0	0	0	0	0	0	0	6.58545	9.5575	6.58545	6.58545	6.58545	6.58545	6.58545	6.58545	6.58545	chr1	43960083	43973520	+	1_44030365_44016929_-13436|19.02|14|33	youxintian_mouse28026	NM_009418	Tpp2	exonic	897
chr1:43990511-43991359+	0	0	0	0	0	0	0	0	0	6.58545	6.58545	6.58545	6.58545	6.58545	6.58545	6.58545	6.58545	6.58545	chr1	43990510	43991359	+		novel	NM_009418	Tpp2	exonic	249
chr1:44161810-44164084+	0	2	1	0	0	0	2	0	0	6.58545	9.5575	9.44345	6.58545	6.58545	6.58545	9.74562	6.58545	6.58545	chr1	44161809	44164084	+	1_44220929_44218655_-2274|16.27|4|4	youxintian_mouse28026	NM_011729	Ercc5	exonic	352
chr1:51813003-51863434-	0	0	0	0	0	0	2	0	0	6.58545	6.58545	6.58545	6.58545	6.58545	6.58545	9.74562	6.58545	6.58545	chr1	51813002	51863434	-	1_51920278_51869847_-50431|18.98|6|10	youxintian_mouse28026	NM_010863	Myo1b	exonic	427
chr1:52466890-52479289-	0	0	0	0	0	2	0	0	0	6.58545	6.58545	6.58545	6.58545	6.58545	9.62495	6.58545	6.58545	6.58545	chr1	52466889	52479289	-		novel	NM_008667	Nab1	exonic	142
chr1:52479238-52490755-	0	2	0	2	0	0	2	0	2	6.58545	9.5575	6.58545	9.93954	6.58545	6.58545	9.74562	6.58545	9.80143	chr1	52479237	52490755	-	1_52547599_52536082_-11517|21.10|19|126	youxintian_mouse28026	NM_008667	Nab1	exonic	1021
chr1:52708164-52709661-	0	0	0	0	0	0	0	0	2	6.58545	6.58545	6.58545	6.58545	6.58545	6.58545	6.58545	6.58545	9.80143	chr1	52708163	52709661	-		novel	NM_133829	Mfsd6	sense overlapping	1498
chr1:52708164-52709755-	1	18	1	0	8	7	13	5	1	9.11153	12.554	9.44345	6.58545	11.7287	11.3012	12.3026	10.9535	8.94889	chr1	52708163	52709755	-	mm9_circ_009434	circBase	NM_133829	Mfsd6	exonic	1592
chr1:53256629-53275252-	0	3	0	0	0	0	0	0	0	6.58545	10.0798	6.58545	6.58545	6.58545	6.58545	6.58545	6.58545	6.58545	chr1	53256628	53275252	-		novel	NM_153556	Pms1	exonic	450
chr1:53256629-53282092-	0	0	0	1	1	2	1	1	0	6.58545	6.58545	6.58545	9.07415	8.98942	9.62495	8.8986	8.88706	6.58545	chr1	53256628	53282092	-	mm9_circ_001535	circBase	NM_153556	Pms1	exonic	602
chr1:53760982-53776679-	0	2	0	0	0	0	0	0	0	6.58545	9.5575	6.58545	6.58545	6.58545	6.58545	6.58545	6.58545	6.58545	chr1	53760981	53776679	-	1_53833523_53817826_-15697|16.61|1|4	youxintian_mouse28026	NM_133810	Stk17b	exonic	877
chr1:54828612-54877821-	0	0	0	0	0	0	0	0	0	6.58545	6.58545	6.58545	6.58545	6.58545	6.58545	6.58545	6.58545	6.58545	chr1	54828611	54877821	-	1_54934665_54885456_-49209|12.27|2|3	youxintian_mouse28026	NM_001081433	Ankrd44	sense overlapping	49210
chr1:54874957-54877821-	0	2	0	0	0	0	0	0	0	6.58545	9.5575	6.58545	6.58545	6.58545	6.58545	6.58545	6.58545	6.58545	chr1	54874956	54877821	-		novel	ENSMUST00000044359	Ankrd44	intronic	2865
chr1:55081073-55084785-	0	0	2	0	0	0	0	3	0	6.58545	6.58545	10.3404	6.58545	6.58545	6.58545	6.58545	10.2624	6.58545	chr1	55081072	55084785	-		novel	NM_010477	Hspd1	exonic	795
chr1:55083725-55084785-	1	0	0	0	0	1	2	2	0	9.11153	6.58545	6.58545	6.58545	6.58545	8.79054	9.74562	9.73278	6.58545	chr1	55083724	55084785	-		novel	NM_010477	Hspd1	exonic	336
chr1:55340473-55355739-	0	2	0	1	0	0	0	0	0	6.58545	9.5575	6.58545	9.07415	6.58545	6.58545	6.58545	6.58545	6.58545	chr1	55340472	55355739	-	1_55412583_55397317_-15266|14.30|5|32	youxintian_mouse28026	NM_029267	Boll	exonic	351
chr1:56831439-56850383-	2	1	0	0	0	0	1	1	2	9.98053	8.73056	6.58545	6.58545	6.58545	6.58545	8.8986	8.88706	9.80143	chr1	56831438	56850383	-	1_56907227_56888283_-18944|17.39|7|12	youxintian_mouse28026	NM_139146	Satb2	exonic	567
chr1:56831439-56891265-	0	0	0	0	1	2	0	0	0	6.58545	6.58545	6.58545	6.58545	8.98942	9.62495	6.58545	6.58545	6.58545	chr1	56831438	56891265	-	1_56948109_56888283_-59826|19.48|7|11	youxintian_mouse28026	NM_139146	Satb2	exonic	1143
chr1:56845576-56850383-	0	1	1	1	0	1	0	0	0	6.58545	8.73056	9.44345	9.07415	6.58545	8.79054	6.58545	6.58545	6.58545	chr1	56845575	56850383	-		novel	NM_139146	Satb2	exonic	369
chr1:56845576-56891265-	0	0	0	0	0	0	1	0	2	6.58545	6.58545	6.58545	6.58545	6.58545	6.58545	8.8986	6.58545	9.80143	chr1	56845575	56891265	-	1_56948109_56902420_-45689|21.21|4|5	youxintian_mouse28026	NM_139146	Satb2	exonic	945
chr1:56850171-56891265-	0	0	0	0	0	0	0	0	0	6.58545	6.58545	6.58545	6.58545	6.58545	6.58545	6.58545	6.58545	6.58545	chr1	56850170	56891265	-		novel	NM_139146	Satb2	exonic	789
chr1:56871312-56871784-	0	0	0	0	1	2	0	0	0	6.58545	6.58545	6.58545	6.58545	8.98942	9.62495	6.58545	6.58545	6.58545	chr1	56871311	56871784	-	1_56928628_56928156_-472|19.98|3|5	youxintian_mouse28026	NM_139146	Satb2	exonic	473
chr1:56891163-56974321-	0	0	0	0	0	2	1	0	0	6.58545	6.58545	6.58545	6.58545	6.58545	9.62495	8.8986	6.58545	6.58545	chr1	56891162	56974321	-	1_57031165_56948007_-83158|15.32|1|2	youxintian_mouse28026	NM_139146	Satb2	sense overlapping	83159
chr1:56947313-56948255-	0	0	0	0	0	0	0	0	2	6.58545	6.58545	6.58545	6.58545	6.58545	6.58545	6.58545	6.58545	9.80143	chr1	56947312	56948255	-		novel	ENSMUST00000042857	Satb2	intronic	943
chr1:56948079-56948255-	0	1	0	0	0	3	0	0	2	6.58545	8.73056	6.58545	6.58545	6.58545	10.1502	6.58545	6.58545	9.80143	chr1	56948078	56948255	-	1_57005099_57004923_-176|16.00|2|2	youxintian_mouse28026	NM_139146	Satb2	exonic	177
chr1:56948079-56974321-	0	0	0	1	4	0	2	0	0	6.58545	6.58545	6.58545	9.07415	10.769	6.58545	9.74562	6.58545	6.58545	chr1	56948078	56974321	-		novel	NM_139146	Satb2	sense overlapping	26243
chr1:56948079-56980248-	0	0	0	0	0	0	2	0	0	6.58545	6.58545	6.58545	6.58545	6.58545	6.58545	9.74562	6.58545	6.58545	chr1	56948078	56980248	-		novel	NM_139146	Satb2	sense overlapping	32170
chr1:58414372-58421934-	0	0	0	0	0	0	0	0	2	6.58545	6.58545	6.58545	6.58545	6.58545	6.58545	6.58545	6.58545	9.80143	chr1	58414371	58421934	-		novel	NR_027853	Clk1	exonic	963
chr1:58417013-58417383-	0	2	0	1	0	0	0	1	2	6.58545	9.5575	6.58545	9.07415	6.58545	6.58545	6.58545	8.88706	9.80143	chr1	58417012	58417383	-	1_58474227_58473857_-370|19.73|10|12	youxintian_mouse28026	NR_027853	Clk1	exonic	284
chr1:58474809-58483703-	0	0	0	0	0	0	0	0	0	6.58545	6.58545	6.58545	6.58545	6.58545	6.58545	6.58545	6.58545	6.58545	chr1	58474808	58483703	-	1_58540547_58531653_-8894|17.28|1|2	youxintian_mouse28026	NM_008765	Orc2	exonic	597
chr1:58476434-58483703-	0	0	0	2	0	0	0	0	0	6.58545	6.58545	6.58545	9.93954	6.58545	6.58545	6.58545	6.58545	6.58545	chr1	58476433	58483703	-	1_58540547_58533278_-7269|17.63|2|2	youxintian_mouse28026	NM_008765	Orc2	exonic	464
chr1:58726306-58741046+	0	0	0	0	1	0	0	0	0	6.58545	6.58545	6.58545	6.58545	8.98942	6.58545	6.58545	6.58545	6.58545	chr1	58726305	58741046	+		novel	NM_207653	Cflar	exonic	930
chr1:58823915-58833774+	0	2	0	0	0	1	4	1	0	6.58545	9.5575	6.58545	6.58545	6.58545	8.79054	10.6626	8.88706	6.58545	chr1	58823914	58833774	+	1_58890618_58880759_-9859|14.34|4|4	youxintian_mouse28026	NM_009812	Casp8	exonic	836
chr1:58911636-58912262-	0	0	0	0	0	2	0	0	0	6.58545	6.58545	6.58545	6.58545	6.58545	9.62495	6.58545	6.58545	6.58545	chr1	58911635	58912262	-		novel	NM_172406	Trak2	exonic	278
chr1:59642418-59655532-	1	1	0	1	0	1	0	4	0	9.11153	8.73056	6.58545	9.07415	6.58545	8.79054	6.58545	10.649	6.58545	chr1	59642417	59655532	-		novel	NM_009460	Sumo1	exonic	225
chr1:59920737-59920886+	0	0	0	2	0	0	0	0	0	6.58545	6.58545	6.58545	9.93954	6.58545	6.58545	6.58545	6.58545	6.58545	chr1	59920736	59920886	+		novel	ENSMUST00000036540	Fam117b	intronic	150
chr1:60224625-60230685+	0	0	0	0	0	0	2	0	0	6.58545	6.58545	6.58545	6.58545	6.58545	6.58545	9.74562	6.58545	6.58545	chr1	60224624	60230685	+		novel	NM_173444	Nbeal1	exonic	191
chr1:60354514-60366727+	0	0	0	2	0	0	0	0	0	6.58545	6.58545	6.58545	9.93954	6.58545	6.58545	6.58545	6.58545	6.58545	chr1	60354513	60366727	+		novel	NM_030013	Cyp20a1	exonic	390
chr1:60525592-60527489-	0	0	0	0	0	1	0	0	0	6.58545	6.58545	6.58545	6.58545	6.58545	8.79054	6.58545	6.58545	6.58545	chr1	60525591	60527489	-		novel	NM_001045513	Raph1	exonic	615
chr1:62010307-62076494+	0	0	0	0	0	0	0	0	0	6.58545	6.58545	6.58545	6.58545	6.58545	6.58545	6.58545	6.58545	6.58545	chr1	62010306	62076494	+		novel	NM_001081050	Pard3b	exonic	282
chr1:63085668-63105759-	0	0	0	0	0	1	0	0	1	6.58545	6.58545	6.58545	6.58545	6.58545	8.79054	6.58545	6.58545	8.94889	chr1	63085667	63105759	-	1_63152333_63132242_-20091|18.86|3|3	youxintian_mouse28026	NM_001081436	Ino80d	exonic	1082
chr1:63159750-63170914-	0	0	0	0	0	0	0	0	0	6.58545	6.58545	6.58545	6.58545	6.58545	6.58545	6.58545	6.58545	6.58545	chr1	63159749	63170914	-		novel	NM_145518	Ndufs1	exonic	992
chr1:63543119-63546500+	0	2	0	0	0	0	0	0	0	6.58545	9.5575	6.58545	6.58545	6.58545	6.58545	6.58545	6.58545	6.58545	chr1	63543118	63546500	+		novel	NM_011780	Adam23	exonic	321
chr1:64078707-64079334-	1	0	0	0	2	0	0	0	0	9.11153	6.58545	6.58545	6.58545	9.84625	6.58545	6.58545	6.58545	6.58545	chr1	64078706	64079334	-	1_64125908_64125281_-627|19.13|16|47	youxintian_mouse28026	NM_033563	Klf7	exonic	628
chr1:64550849-64576329+	3	1	0	0	1	2	1	4	0	10.519	8.73056	6.58545	6.58545	8.98942	9.62495	8.8986	10.649	6.58545	chr1	64550848	64576329	+	mm9_circ_013998	circBase	NM_009952	Creb1	exonic	889
chr1:64576310-64576514+	0	0	0	0	0	0	0	0	0	6.58545	6.58545	6.58545	6.58545	6.58545	6.58545	6.58545	6.58545	6.58545	chr1	64576309	64576514	+		novel	NM_009952	Creb1	sense overlapping	205
chr1:65190319-65205678+	0	0	0	1	1	0	1	0	0	6.58545	6.58545	6.58545	9.07415	8.98942	6.58545	8.8986	6.58545	6.58545	chr1	65190318	65205678	+	1_65252252_65236893_-15359|18.77|3|3	youxintian_mouse28026	NM_011086	Pikfyve	exonic	953
chr1:66471976-66491131+	0	0	0	0	0	0	2	0	0	6.58545	6.58545	6.58545	6.58545	6.58545	6.58545	9.74562	6.58545	6.58545	chr1	66471975	66491131	+	mm9_circ_000661	circBase	NM_175510	Unc80	exonic	800
chr1:66762048-66802168-	0	2	0	1	0	1	0	0	0	6.58545	9.5575	6.58545	9.07415	6.58545	8.79054	6.58545	6.58545	6.58545	chr1	66762047	66802168	-	1_66848742_66808622_-40120|17.27|18|36	youxintian_mouse28026	NM_177645	Kansl1l	exonic	1787
chr1:66762048-66807604-	2	0	0	0	0	2	2	0	0	9.98053	6.58545	6.58545	6.58545	6.58545	9.62495	9.74562	6.58545	6.58545	chr1	66762047	66807604	-	1_66854178_66808622_-45556|22.02|15|37	youxintian_mouse28026	uc011wml.1	Kansl1l	exonic	1867
chr1:66772906-66802168-	0	1	1	0	0	2	0	1	1	6.58545	8.73056	9.44345	6.58545	6.58545	9.62495	6.58545	8.88706	8.94889	chr1	66772905	66802168	-	mm9_circ_016338	circBase	NM_177645	Kansl1l	exonic	1582
chr1:66772906-66807604-	0	0	0	0	0	0	2	1	0	6.58545	6.58545	6.58545	6.58545	6.58545	6.58545	9.74562	8.88706	6.58545	chr1	66772905	66807604	-	1_66854178_66819480_-34698|22.03|13|51	youxintian_mouse28026	uc011wml.1	Kansl1l	exonic	1662
chr1:66777967-66802168-	0	1	0	0	0	0	1	1	1	6.58545	8.73056	6.58545	6.58545	6.58545	6.58545	8.8986	8.88706	8.94889	chr1	66777966	66802168	-	1_66848742_66824541_-24201|14.75|3|3	youxintian_mouse28026	NM_177645	Kansl1l	exonic	1262
chr1:66801049-66802168-	1	3	0	0	1	3	1	2	5	9.11153	10.0798	6.58545	6.58545	8.98942	10.1502	8.8986	9.73278	11.0271	chr1	66801048	66802168	-	1_66848742_66847623_-1119|15.45|20|61	youxintian_mouse28026	NM_177645	Kansl1l	exonic	1120
chr1:66801049-66807604-	0	1	0	0	1	1	0	0	0	6.58545	8.73056	6.58545	6.58545	8.98942	8.79054	6.58545	6.58545	6.58545	chr1	66801048	66807604	-	mm9_circ_000550	circBase	uc007bip.1	Kansl1l	exonic	1200
chr1:69570493-69578047-	0	0	0	0	2	0	1	1	0	6.58545	6.58545	6.58545	6.58545	9.84625	6.58545	8.8986	8.88706	6.58545	chr1	69570492	69578047	-		novel	NM_011770	Ikzf2	exonic	435
chr1:71046678-71089527-	0	0	0	0	0	0	2	0	0	6.58545	6.58545	6.58545	6.58545	6.58545	6.58545	9.74562	6.58545	6.58545	chr1	71046677	71089527	-		novel	NM_007525	Bard1	exonic	1727
chr1:71074543-71089527-	0	1	1	1	0	3	1	0	0	6.58545	8.73056	9.44345	9.07415	6.58545	10.1502	8.8986	6.58545	6.58545	chr1	71074542	71089527	-	1_71136101_71121117_-14984|18.60|5|9	youxintian_mouse28026	NM_007525	Bard1	exonic	1138
chr1:74395552-74395767+	0	0	0	0	0	0	0	0	0	6.58545	6.58545	6.58545	6.58545	6.58545	6.58545	6.58545	6.58545	6.58545	chr1	74395551	74395767	+		novel	NM_153088	Ctdsp1	sense overlapping	216
chr1:74585384-74585697-	0	0	0	3	0	0	0	0	0	6.58545	6.58545	6.58545	10.4767	6.58545	6.58545	6.58545	6.58545	6.58545	chr1	74585383	74585697	-	1_74632271_74631958_-313|12.65|5|7	youxintian_mouse28026	NM_029888	Zfp142	exonic	314
chr1:75177303-75179068-	0	2	0	0	0	0	0	0	0	6.58545	9.5575	6.58545	6.58545	6.58545	6.58545	6.58545	6.58545	6.58545	chr1	75177302	75179068	-		novel	NM_023732	Abcb6	exonic	605
chr1:75181644-75192329-	0	0	0	0	0	0	0	2	0	6.58545	6.58545	6.58545	6.58545	6.58545	6.58545	6.58545	9.73278	6.58545	chr1	75181643	75192329	-		novel	NR_109938	Atg9a	sense overlapping	10686
chr1:75194841-75196669+	0	1	0	0	0	2	1	0	0	6.58545	8.73056	6.58545	6.58545	6.58545	9.62495	8.8986	6.58545	6.58545	chr1	75194840	75196669	+	mm9_circ_015463	circBase	NM_026187	Ankzf1	exonic	943
chr1:75242670-75244892+	0	0	0	0	0	0	1	0	0	6.58545	6.58545	6.58545	6.58545	6.58545	6.58545	8.8986	6.58545	6.58545	chr1	75242669	75244892	+		novel	NM_020266	Dnajb2	sense overlapping	2223
chr1:75384656-75402473+	0	0	0	0	0	0	0	0	0	6.58545	6.58545	6.58545	6.58545	6.58545	6.58545	6.58545	6.58545	6.58545	chr1	75384655	75402473	+		novel	NM_007463	Speg	exonic	2502
chr1:78360071-78360229+	0	0	0	0	0	0	0	2	1	6.58545	6.58545	6.58545	6.58545	6.58545	6.58545	6.58545	9.73278	8.94889	chr1	78360070	78360229	+		novel	NM_001004173	Sgpp2	exonic	159
chr1:78360071-78384216+	0	0	0	0	0	0	2	0	0	6.58545	6.58545	6.58545	6.58545	6.58545	6.58545	9.74562	6.58545	6.58545	chr1	78360070	78384216	+		novel	NM_001004173	Sgpp2	sense overlapping	24146
chr1:78443635-78472634-	0	0	0	0	3	1	0	0	0	6.58545	6.58545	6.58545	6.58545	10.3801	8.79054	6.58545	6.58545	6.58545	chr1	78443634	78472634	-	1_78469209_78440210_-28999|20.57|2|2	youxintian_mouse28026	NM_011811	Farsb	exonic	1163
chr1:78454754-78482363-	0	0	0	0	0	0	0	0	2	6.58545	6.58545	6.58545	6.58545	6.58545	6.58545	6.58545	6.58545	9.80143	chr1	78454753	78482363	-	1_78478938_78451329_-27609|19.41|4|4	youxintian_mouse28026	NM_011811	Farsb	exonic	1404
chr1:78466967-78471191-	0	0	0	0	0	0	0	0	0	6.58545	6.58545	6.58545	6.58545	6.58545	6.58545	6.58545	6.58545	6.58545	chr1	78466966	78471191	-		novel	NM_011811	Farsb	exonic	294
chr1:78466967-78476305-	0	2	0	0	0	2	0	0	1	6.58545	9.5575	6.58545	6.58545	6.58545	9.62495	6.58545	6.58545	8.94889	chr1	78466966	78476305	-	1_78472880_78463542_-9338|16.44|9|10	youxintian_mouse28026	NM_011811	Farsb	exonic	561
chr1:78681593-78682010+	0	0	0	0	3	2	0	0	1	6.58545	6.58545	6.58545	6.58545	10.3801	9.62495	6.58545	6.58545	8.94889	chr1	78681592	78682010	+		novel	NM_028817	Acsl3	exonic	418
chr1:78681593-78705391+	1	1	0	1	0	1	1	1	0	9.11153	8.73056	6.58545	9.07415	6.58545	8.79054	8.8986	8.88706	6.58545	chr1	78681592	78705391	+	1_78701966_78678168_-23798|22.97|4|4	youxintian_mouse28026	NM_028817	Acsl3	exonic	2045
chr1:80304080-80323056-	2	0	1	0	0	0	0	0	0	9.98053	6.58545	9.44345	6.58545	6.58545	6.58545	6.58545	6.58545	6.58545	chr1	80304079	80323056	-	1_80319631_80300655_-18976|17.87|13|24	youxintian_mouse28026	NM_016716	Cul3	exonic	312
chr1:82236636-82237604-	0	2	1	0	0	0	0	0	0	6.58545	9.5575	9.44345	6.58545	6.58545	6.58545	6.58545	6.58545	6.58545	chr1	82236635	82237604	-		novel	NM_010570	Irs1	sense overlapping	969
chr1:82340319-82342862+	2	0	0	0	0	0	1	3	0	9.98053	6.58545	6.58545	6.58545	6.58545	6.58545	8.8986	10.2624	6.58545	chr1	82340318	82342862	+	1_82339437_82336894_-2543|20.90|11|31	youxintian_mouse28026	NM_029777	Rhbdd1	exonic	645
chr1:82893424-82895647+	0	0	0	0	0	0	0	0	0	6.58545	6.58545	6.58545	6.58545	6.58545	6.58545	6.58545	6.58545	6.58545	chr1	82893423	82895647	+	1_82892222_82889999_-2223|14.36|2|2	youxintian_mouse28026	NM_010472	Agfg1	sense overlapping	2224
chr1:84736982-84763931-	0	0	0	0	0	0	0	0	0	6.58545	6.58545	6.58545	6.58545	6.58545	6.58545	6.58545	6.58545	6.58545	chr1	84736981	84763931	-		novel	NM_133975	Trip12	exonic	3363
chr1:84738678-84739656-	0	0	0	0	0	0	0	0	2	6.58545	6.58545	6.58545	6.58545	6.58545	6.58545	6.58545	6.58545	9.80143	chr1	84738677	84739656	-	1_84736231_84735253_-978|18.41|4|4	youxintian_mouse28026	NM_133975	Trip12	exonic	300
chr1:84776317-84794327-	1	3	1	0	0	1	1	0	1	9.11153	10.0798	9.44345	6.58545	6.58545	8.79054	8.8986	6.58545	8.94889	chr1	84776316	84794327	-	1_84790902_84772892_-18010|15.43|13|28	youxintian_mouse28026	NM_133975	Trip12	exonic	1226
chr1:84782827-84814969-	0	1	0	0	1	0	0	0	0	6.58545	8.73056	6.58545	6.58545	8.98942	6.58545	6.58545	6.58545	6.58545	chr1	84782826	84814969	-	1_84811544_84779402_-32142|18.03|13|23	youxintian_mouse28026	NM_133975	Trip12	exonic	1193
chr1:87219581-87226233+	0	0	2	0	0	0	0	0	0	6.58545	6.58545	10.3404	6.58545	6.58545	6.58545	6.58545	6.58545	6.58545	chr1	87219580	87226233	+		novel	NM_023314	Eif4e2	exonic	645
chr1:87364104-87365279+	0	0	0	0	0	0	0	0	0	6.58545	6.58545	6.58545	6.58545	6.58545	6.58545	6.58545	6.58545	6.58545	chr1	87364103	87365279	+	1_89261854_89260679_-1175|19.10|12|30	youxintian_mouse28026	NM_146112	Gigyf2	exonic	226
chr1:87364104-87380008+	4	11	0	5	2	11	3	3	7	10.9103	11.8581	6.58545	11.1742	9.84625	11.9332	10.2758	10.2624	11.4934	chr1	87364103	87380008	+	mm9_circ_010385	circBase	NM_146112	Gigyf2	exonic	494
chr1:87760051-87790687+	0	0	0	0	0	2	0	0	0	6.58545	6.58545	6.58545	6.58545	6.58545	9.62495	6.58545	6.58545	6.58545	chr1	87760050	87790687	+		novel	NM_029846	Atg16l1	exonic	1615
chr1:87880368-87881939+	2	0	0	2	0	2	1	2	2	9.98053	6.58545	6.58545	9.93954	6.58545	9.62495	8.8986	9.73278	9.80143	chr1	87880367	87881939	+	mm9_circ_011975	circBase	NM_177646	Dgkd	exonic	192
chr1:87965306-87967598-	0	0	0	0	0	0	0	0	0	6.58545	6.58545	6.58545	6.58545	6.58545	6.58545	6.58545	6.58545	6.58545	chr1	87965305	87967598	-		novel	NM_001198573	Usp40	exonic	213
chr1:88071534-88095913+	0	0	0	0	0	2	0	0	0	6.58545	6.58545	6.58545	6.58545	6.58545	9.62495	6.58545	6.58545	6.58545	chr1	88071533	88095913	+		novel	ENSMUST00000113142	Ugt1a10	intronic	24380
chr1:88138473-88139331+	1	0	0	0	0	1	0	0	0	9.11153	6.58545	6.58545	6.58545	6.58545	8.79054	6.58545	6.58545	6.58545	chr1	88138472	88139331	+		novel	NM_145079	Ugt1a6a	exonic	859
chr1:89143550-89145906+	0	3	0	0	0	0	0	0	0	6.58545	10.0798	6.58545	6.58545	6.58545	6.58545	6.58545	6.58545	6.58545	chr1	89143549	89145906	+		novel	NM_133816	Sh3bp4	exonic	2357
chr1:89627761-89634294+	1	3	1	0	0	0	0	0	1	9.11153	10.0798	9.44345	6.58545	6.58545	6.58545	6.58545	6.58545	8.94889	chr1	89627760	89634294	+	mm9_circ_017649	circBase	NM_178119	Agap1	exonic	363
chr1:89663661-89671271+	0	1	0	0	1	0	0	0	2	6.58545	8.73056	6.58545	6.58545	8.98942	6.58545	6.58545	6.58545	9.80143	chr1	89663660	89671271	+	mm9_circ_016400	circBase	NM_178119	Agap1	exonic	377
chr1:89725961-89743896+	2	0	0	0	1	0	0	0	0	9.98053	6.58545	6.58545	6.58545	8.98942	6.58545	6.58545	6.58545	6.58545	chr1	89725960	89743896	+	1_91640471_91622536_-17935|21.86|7|7	youxintian_mouse28026	NM_178119	Agap1	exonic	274
chr1:89766306-89789324+	0	0	0	2	0	0	0	0	0	6.58545	6.58545	6.58545	9.93954	6.58545	6.58545	6.58545	6.58545	6.58545	chr1	89766305	89789324	+	1_91685899_91662881_-23018|18.40|6|9	youxintian_mouse28026	NM_178119	Agap1	exonic	321
chr1:89834434-89843243+	0	0	0	0	1	0	0	0	0	6.58545	6.58545	6.58545	6.58545	8.98942	6.58545	6.58545	6.58545	6.58545	chr1	89834433	89843243	+	1_91739818_91731009_-8809|18.10|14|43	youxintian_mouse28026	NM_178119	Agap1	exonic	469
chr1:90249408-90251153+	0	0	0	0	0	0	2	0	0	6.58545	6.58545	6.58545	6.58545	6.58545	6.58545	9.74562	6.58545	6.58545	chr1	90249407	90251153	+		novel			intergenic	1746
chr1:91376318-91381972-	0	1	0	3	1	2	0	0	0	6.58545	8.73056	6.58545	10.4767	8.98942	9.62495	6.58545	6.58545	6.58545	chr1	91376317	91381972	-	1_93278549_93272895_-5654|16.75|10|20	youxintian_mouse28026	NM_023343	Ilkap	exonic	324
chr1:91384565-91385346-	4	2	1	0	1	2	3	2	1	10.9103	9.5575	9.44345	6.58545	8.98942	9.62495	10.2758	9.73278	8.94889	chr1	91384564	91385346	-	mm9_circ_010373	circBase	NM_023343	Ilkap	exonic	201
chr1:93420069-93427636-	0	2	0	0	0	1	0	0	0	6.58545	9.5575	6.58545	6.58545	6.58545	8.79054	6.58545	6.58545	6.58545	chr1	93420068	93427636	-		novel	NM_133808	Hdlbp	exonic	876
chr1:93420069-93442250-	0	0	0	2	0	0	0	0	0	6.58545	6.58545	6.58545	9.93954	6.58545	6.58545	6.58545	6.58545	6.58545	chr1	93420068	93442250	-	1_95338827_95316646_-22181|13.23|2|3	youxintian_mouse28026	NM_133808	Hdlbp	exonic	2271
chr1:93428148-93431150-	0	0	0	0	2	0	0	0	0	6.58545	6.58545	6.58545	6.58545	9.84625	6.58545	6.58545	6.58545	6.58545	chr1	93428147	93431150	-		novel	NM_133808	Hdlbp	sense overlapping	3003
chr1:93497341-93500559+	0	0	0	0	0	0	0	0	0	6.58545	6.58545	6.58545	6.58545	6.58545	6.58545	6.58545	6.58545	6.58545	chr1	93497340	93500559	+	1_95397136_95393918_-3218|17.84|5|9	youxintian_mouse28026	NM_010891	Sept2	exonic	479
chr1:93714898-93725316-	0	0	0	0	0	0	0	3	2	6.58545	6.58545	6.58545	6.58545	6.58545	6.58545	6.58545	10.2624	9.80143	chr1	93714897	93725316	-	1_95621893_95611475_-10418|20.88|8|14	youxintian_mouse28026	NM_025920	Thap4	exonic	374
chr1:97645542-97654689-	0	0	0	0	0	0	0	0	1	6.58545	6.58545	6.58545	6.58545	6.58545	6.58545	6.58545	6.58545	8.94889	chr1	97645541	97654689	-	1_99551266_99542119_-9147|16.76|7|12	youxintian_mouse28026	NM_133825	D1Ertd622e	sense overlapping	9148
chr1:97645861-97654689-	0	0	0	0	0	0	0	0	0	6.58545	6.58545	6.58545	6.58545	6.58545	6.58545	6.58545	6.58545	6.58545	chr1	97645860	97654689	-	1_99551266_99542438_-8828|19.16|2|3	youxintian_mouse28026	NM_133825	D1Ertd622e	sense overlapping	8829
chr1:97831455-97844712-	0	0	0	0	0	0	0	0	2	6.58545	6.58545	6.58545	6.58545	6.58545	6.58545	6.58545	6.58545	9.80143	chr1	97831454	97844712	-		novel	NM_013626	Pam	exonic	881
chr1:97884126-97898389-	0	0	0	0	0	0	0	0	0	6.58545	6.58545	6.58545	6.58545	6.58545	6.58545	6.58545	6.58545	6.58545	chr1	97884125	97898389	-		novel	NM_013626	Pam	exonic	636
chr1:105551246-105558090-	0	0	0	0	0	0	0	0	2	6.58545	6.58545	6.58545	6.58545	6.58545	6.58545	6.58545	6.58545	9.80143	chr1	105551245	105558090	-		novel	NM_013784	Pign	sense overlapping	6845
chr1:105817669-105827735+	0	0	0	0	0	0	0	0	0	6.58545	6.58545	6.58545	6.58545	6.58545	6.58545	6.58545	6.58545	6.58545	chr1	105817668	105827735	+		novel	NM_009399	Tnfrsf11a	exonic	1101
chr1:106772402-106791789-	0	1	0	1	0	2	0	0	0	6.58545	8.73056	6.58545	9.07415	6.58545	9.62495	6.58545	6.58545	6.58545	chr1	106772401	106791789	-		novel	ENSMUST00000112736	Vps4b	exonic	1353
chr1:106786703-106791789-	0	0	0	0	0	0	0	1	2	6.58545	6.58545	6.58545	6.58545	6.58545	6.58545	6.58545	8.88706	9.80143	chr1	106786702	106791789	-		novel	NM_009190	Vps4b	exonic	337
chr1:118652301-118656520+	0	0	0	0	2	0	0	0	0	6.58545	6.58545	6.58545	6.58545	9.84625	6.58545	6.58545	6.58545	6.58545	chr1	118652300	118656520	+		novel	NM_023755	Tfcp2l1	exonic	443
chr1:118652301-118659118+	0	0	0	0	0	0	3	0	0	6.58545	6.58545	6.58545	6.58545	6.58545	6.58545	10.2758	6.58545	6.58545	chr1	118652300	118659118	+		novel	NM_023755	Tfcp2l1	exonic	554
chr1:119567796-119579077-	0	0	0	0	0	2	0	1	0	6.58545	6.58545	6.58545	6.58545	6.58545	9.62495	6.58545	8.88706	6.58545	chr1	119567795	119579077	-	1_121475654_121464373_-11281|18.01|18|46	youxintian_mouse28026	NM_145506	Epb4.1l5	exonic	456
chr1:119615346-119623968-	0	0	0	0	0	0	0	2	0	6.58545	6.58545	6.58545	6.58545	6.58545	6.58545	6.58545	9.73278	6.58545	chr1	119615345	119623968	-		novel	NM_145506	Epb4.1l5	exonic	588
chr1:119721864-119773271-	0	1	0	0	0	0	0	1	0	6.58545	8.73056	6.58545	6.58545	6.58545	6.58545	6.58545	8.88706	6.58545	chr1	119721863	119773271	-	1_121669848_121618441_-51407|20.46|9|10	youxintian_mouse28026	NM_019933	Ptpn4	exonic	755
chr1:119741355-119765922-	0	0	0	2	0	0	0	0	0	6.58545	6.58545	6.58545	9.93954	6.58545	6.58545	6.58545	6.58545	6.58545	chr1	119741354	119765922	-	1_121662499_121637932_-24567|16.56|21|154	youxintian_mouse28026	NM_019933	Ptpn4	exonic	396
chr1:119765031-119783589-	0	0	0	0	0	0	0	0	4	6.58545	6.58545	6.58545	6.58545	6.58545	6.58545	6.58545	6.58545	10.7216	chr1	119765030	119783589	-	1_121680166_121661608_-18558|15.10|12|14	youxintian_mouse28026	NM_019933	Ptpn4	exonic	449
chr1:125403393-125418304-	0	0	0	1	0	2	0	1	0	6.58545	6.58545	6.58545	9.07415	6.58545	9.62495	6.58545	8.88706	6.58545	chr1	125403392	125418304	-		novel	NM_023735	Actr3	exonic	814
chr1:127306634-127320765+	0	0	0	0	0	0	0	0	0	6.58545	6.58545	6.58545	6.58545	6.58545	6.58545	6.58545	6.58545	6.58545	chr1	127306633	127320765	+	1_129217342_129203211_-14131|20.05|5|5	youxintian_mouse28026	NM_145128	Mgat5	exonic	545
chr1:127320604-127320765+	0	0	0	0	0	0	0	0	0	6.58545	6.58545	6.58545	6.58545	6.58545	6.58545	6.58545	6.58545	6.58545	chr1	127320603	127320765	+		novel	NM_145128	Mgat5	exonic	162
chr1:127791605-127799553+	1	0	1	0	0	2	0	0	0	9.11153	6.58545	9.44345	6.58545	6.58545	9.62495	6.58545	6.58545	6.58545	chr1	127791604	127799553	+	mm9_circ_011539	circBase	NM_028399	Ccnt2	exonic	463
chr1:127791605-127803659+	2	0	0	0	0	1	1	0	0	9.98053	6.58545	6.58545	6.58545	6.58545	8.79054	8.8986	6.58545	6.58545	chr1	127791604	127803659	+	1_129700236_129688182_-12054|17.57|5|8	youxintian_mouse28026	NM_028399	Ccnt2	sense overlapping	12055
chr1:127889156-127891096+	0	0	0	0	0	0	0	0	0	6.58545	6.58545	6.58545	6.58545	6.58545	6.58545	6.58545	6.58545	6.58545	chr1	127889155	127891096	+	1_129787673_129785733_-1940|18.02|15|21	youxintian_mouse28026	NM_178690	Rab3gap1	exonic	212
chr1:127889156-127909950+	0	0	0	3	0	0	0	0	0	6.58545	6.58545	6.58545	10.4767	6.58545	6.58545	6.58545	6.58545	6.58545	chr1	127889155	127909950	+	1_129806527_129785733_-20794|17.35|3|3	youxintian_mouse28026	NM_178690	Rab3gap1	exonic	598
chr1:127924191-127928121+	0	0	0	0	2	0	0	0	0	6.58545	6.58545	6.58545	6.58545	9.84625	6.58545	6.58545	6.58545	6.58545	chr1	127924190	127928121	+		novel	NM_178690	Rab3gap1	sense overlapping	3931
chr1:127924728-127928121+	0	0	0	0	2	0	0	1	0	6.58545	6.58545	6.58545	6.58545	9.84625	6.58545	6.58545	8.88706	6.58545	chr1	127924727	127928121	+	1_129824698_129821305_-3393|12.87|4|6	youxintian_mouse28026	NM_178690	Rab3gap1	exonic	523
chr1:127930707-127937565+	0	0	0	0	0	0	0	0	0	6.58545	6.58545	6.58545	6.58545	6.58545	6.58545	6.58545	6.58545	6.58545	chr1	127930706	127937565	+	1_129834142_129827284_-6858|19.44|5|9	youxintian_mouse28026	NM_178690	Rab3gap1	exonic	738
chr1:128167893-128176956+	0	0	0	0	0	0	0	0	0	6.58545	6.58545	6.58545	6.58545	6.58545	6.58545	6.58545	6.58545	6.58545	chr1	128167892	128176956	+	1_130073533_130064470_-9063|19.83|12|23	youxintian_mouse28026	NM_181750	R3hdm1	sense overlapping	9064
chr1:128193460-128197097+	0	0	0	0	0	0	2	0	0	6.58545	6.58545	6.58545	6.58545	6.58545	6.58545	9.74562	6.58545	6.58545	chr1	128193459	128197097	+	1_130093674_130090037_-3637|19.24|2|2	youxintian_mouse28026	NM_181750	R3hdm1	exonic	421
chr1:128193460-128221703+	0	0	0	0	0	1	0	0	1	6.58545	6.58545	6.58545	6.58545	6.58545	8.79054	6.58545	6.58545	8.94889	chr1	128193459	128221703	+		novel	NM_181750	R3hdm1	exonic	832
chr1:128193460-128223641+	0	1	0	1	1	0	0	0	0	6.58545	8.73056	6.58545	9.07415	8.98942	6.58545	6.58545	6.58545	6.58545	chr1	128193459	128223641	+	mm9_circ_017561	circBase	NM_181750	R3hdm1	exonic	1005
chr1:128211205-128223641+	0	0	0	0	1	0	0	0	0	6.58545	6.58545	6.58545	6.58545	8.98942	6.58545	6.58545	6.58545	6.58545	chr1	128211204	128223641	+	1_130120218_130107782_-12436|19.30|14|37	youxintian_mouse28026	NM_181750	R3hdm1	exonic	584
chr1:128588970-128589244-	0	0	0	0	0	0	0	0	0	6.58545	6.58545	6.58545	6.58545	6.58545	6.58545	6.58545	6.58545	6.58545	chr1	128588969	128589244	-		novel	NM_009911	Cxcr4	sense overlapping	275
chr1:130449042-130449191-	0	0	0	0	0	0	0	0	0	6.58545	6.58545	6.58545	6.58545	6.58545	6.58545	6.58545	6.58545	6.58545	chr1	130449041	130449191	-		novel	ENSMUST00000027650	Cd55	intronic	150
chr1:130682149-130684070-	0	0	0	0	0	0	0	0	0	6.58545	6.58545	6.58545	6.58545	6.58545	6.58545	6.58545	6.58545	6.58545	chr1	130682148	130684070	-	1_132580647_132578726_-1921|18.86|7|25	youxintian_mouse28026	uc007cmd.2	Pfkfb2	intronic	1922
chr1:132014383-132019466+	0	1	0	0	0	1	0	1	1	6.58545	8.73056	6.58545	6.58545	6.58545	8.79054	6.58545	8.88706	8.94889	chr1	132014382	132019466	+		novel	NM_007923	Elk4	exonic	1203
chr1:132014383-132023838+	4	1	0	1	5	4	1	2	4	10.9103	8.73056	6.58545	9.07415	11.0749	10.5344	8.8986	9.73278	10.7216	chr1	132014382	132023838	+		novel	uc007cob.1	Elk4	exonic	1489
chr1:132122037-132122460-	0	0	0	0	0	0	0	0	0	6.58545	6.58545	6.58545	6.58545	6.58545	6.58545	6.58545	6.58545	6.58545	chr1	132122036	132122460	-		novel	NM_008795	Cdk18	exonic	229
chr1:132991700-132992225-	0	0	0	0	0	0	0	0	0	6.58545	6.58545	6.58545	6.58545	6.58545	6.58545	6.58545	6.58545	6.58545	chr1	132991699	132992225	-		novel	NM_008575	Mdm4	sense overlapping	526
chr1:133009137-133012711-	0	0	0	0	0	2	0	0	0	6.58545	6.58545	6.58545	6.58545	6.58545	9.62495	6.58545	6.58545	6.58545	chr1	133009136	133012711	-		novel	NM_008575	Mdm4	exonic	265
chr1:133259009-133274374+	0	1	0	0	0	0	2	0	1	6.58545	8.73056	6.58545	6.58545	6.58545	6.58545	9.74562	6.58545	8.94889	chr1	133259008	133274374	+		novel	NM_182930	Plekha6	exonic	1618
chr1:133259009-133294087+	0	0	0	0	0	0	0	4	0	6.58545	6.58545	6.58545	6.58545	6.58545	6.58545	6.58545	10.649	6.58545	chr1	133259008	133294087	+		novel	NM_182930	Plekha6	exonic	3354
chr1:133278586-133278788+	0	0	0	0	0	0	0	0	0	6.58545	6.58545	6.58545	6.58545	6.58545	6.58545	6.58545	6.58545	6.58545	chr1	133278585	133278788	+		novel	uc007cpx.2	Plekha6	intronic	203
chr1:133281783-133294708+	0	0	0	0	0	3	0	0	0	6.58545	6.58545	6.58545	6.58545	6.58545	10.1502	6.58545	6.58545	6.58545	chr1	133281782	133294708	+		novel	NM_182930	Plekha6	exonic	1591
chr1:133753089-133753749-	0	5	1	0	1	1	0	4	0	6.58545	10.7647	9.44345	6.58545	8.98942	8.79054	6.58545	10.649	6.58545	chr1	133753088	133753749	-	mm9_circ_013750	circBase	uc007cqu.3	Atp2b4	exonic	661
chr1:134422921-134424922+	0	1	0	0	1	0	0	0	3	6.58545	8.73056	6.58545	6.58545	8.98942	6.58545	6.58545	6.58545	10.3337	chr1	134422920	134424922	+		novel	NM_028320	Adipor1	exonic	524
chr1:135532349-135537299-	0	0	0	0	0	0	0	0	0	6.58545	6.58545	6.58545	6.58545	6.58545	6.58545	6.58545	6.58545	6.58545	chr1	135532348	135537299	-	1_137433876_137428926_-4950|19.07|4|4	youxintian_mouse28026	NM_173437	Nav1	exonic	469
chr1:136225336-136227662-	0	0	0	0	0	0	0	0	0	6.58545	6.58545	6.58545	6.58545	6.58545	6.58545	6.58545	6.58545	6.58545	chr1	136225335	136227662	-		novel	NM_028872	5730559C18Rik	exonic	614
chr1:138498576-138516636-	0	0	2	0	0	0	0	0	0	6.58545	6.58545	10.3404	6.58545	6.58545	6.58545	6.58545	6.58545	6.58545	chr1	138498575	138516636	-		novel	NM_021605	Nek7	exonic	426
chr1:139040000-139042043+	3	2	0	0	0	0	0	0	0	10.519	9.5575	6.58545	6.58545	6.58545	6.58545	6.58545	6.58545	6.58545	chr1	139039999	139042043	+	1_140938620_140936577_-2043|18.85|12|182	youxintian_mouse28026	NM_181347	Dennd1b	exonic	170
chr1:139040000-139062971+	0	0	0	0	2	2	1	1	2	6.58545	6.58545	6.58545	6.58545	9.84625	9.62495	8.8986	8.88706	9.80143	chr1	139039999	139062971	+	mm9_circ_002352	circBase	NM_181347	Dennd1b	exonic	486
chr1:139053346-139062971+	0	4	1	0	1	5	5	3	2	6.58545	10.4625	9.44345	6.58545	8.98942	10.8376	10.9673	10.2624	9.80143	chr1	139053345	139062971	+	mm9_circ_009558	circBase	NM_181347	Dennd1b	exonic	316
chr1:139053346-139110485+	0	0	0	0	0	0	2	0	0	6.58545	6.58545	6.58545	6.58545	6.58545	6.58545	9.74562	6.58545	6.58545	chr1	139053345	139110485	+	1_141007062_140949923_-57139|18.97|14|76	youxintian_mouse28026	NM_181347	Dennd1b	exonic	793
chr1:139059067-139110485+	0	0	0	0	1	1	0	0	0	6.58545	6.58545	6.58545	6.58545	8.98942	8.79054	6.58545	6.58545	6.58545	chr1	139059066	139110485	+		novel	NM_181347	Dennd1b	sense overlapping	51419
chr1:139059067-139133761+	0	0	0	0	0	0	0	0	0	6.58545	6.58545	6.58545	6.58545	6.58545	6.58545	6.58545	6.58545	6.58545	chr1	139059066	139133761	+		novel	NM_181347	Dennd1b	sense overlapping	74695
chr1:139081173-139110485+	0	0	0	3	5	1	2	2	2	6.58545	6.58545	6.58545	10.4767	11.0749	8.79054	9.74562	9.73278	9.80143	chr1	139081172	139110485	+	1_141007062_140977750_-29312|19.17|17|95	youxintian_mouse28026	NM_181347	Dennd1b	exonic	477
chr1:139081173-139144000+	2	0	0	0	0	0	0	0	0	9.98053	6.58545	6.58545	6.58545	6.58545	6.58545	6.58545	6.58545	6.58545	chr1	139081172	139144000	+	1_141040577_140977750_-62827|19.48|4|5	youxintian_mouse28026	NM_181347	Dennd1b	exonic	843
chr1:140362949-140383095+	2	0	0	0	0	1	0	0	0	9.98053	6.58545	6.58545	6.58545	6.58545	8.79054	6.58545	6.58545	6.58545	chr1	140362948	140383095	+	mm9_circ_012594	circBase	NM_001081027	Kcnt2	exonic	363
chr1:140362949-140450304+	1	0	0	0	0	2	0	0	0	9.11153	6.58545	6.58545	6.58545	6.58545	9.62495	6.58545	6.58545	6.58545	chr1	140362948	140450304	+	mm9_circ_016043	circBase	NM_001081027	Kcnt2	exonic	1019
chr1:143667625-143677855-	0	1	0	0	0	3	1	0	0	6.58545	8.73056	6.58545	6.58545	6.58545	10.1502	8.8986	6.58545	6.58545	chr1	143667624	143677855	-	1_145524985_145514755_-10230|17.78|19|121	youxintian_mouse28026	NM_145991	Cdc73	exonic	460
chr1:143691275-143695462-	0	0	0	0	0	0	0	1	0	6.58545	6.58545	6.58545	6.58545	6.58545	6.58545	6.58545	8.88706	6.58545	chr1	143691274	143695462	-	1_145542592_145538405_-4187|13.21|19|48	youxintian_mouse28026	NM_145991	Cdc73	exonic	186
chr1:149901100-149902442-	0	0	0	0	0	4	0	1	0	6.58545	6.58545	6.58545	6.58545	6.58545	10.5344	6.58545	8.88706	6.58545	chr1	149901099	149902442	-		novel	NM_008869	Pla2g4a	exonic	263
chr1:150406462-150407577+	2	0	0	0	0	0	0	0	0	9.98053	6.58545	6.58545	6.58545	6.58545	6.58545	6.58545	6.58545	6.58545	chr1	150406461	150407577	+	mm9_circ_006079	circBase	NM_133780	Tpr	exonic	262
chr1:150409203-150425774+	0	0	0	0	0	0	0	2	0	6.58545	6.58545	6.58545	6.58545	6.58545	6.58545	6.58545	9.73278	6.58545	chr1	150409202	150425774	+		novel	NM_133780	Tpr	exonic	2789
chr1:150417382-150421802+	0	0	0	0	0	0	0	0	0	6.58545	6.58545	6.58545	6.58545	6.58545	6.58545	6.58545	6.58545	6.58545	chr1	150417381	150421802	+		novel	NM_133780	Tpr	exonic	609
chr1:150428120-150429545+	0	0	0	0	0	1	1	0	0	6.58545	6.58545	6.58545	6.58545	6.58545	8.79054	8.8986	6.58545	6.58545	chr1	150428119	150429545	+	1_152276675_152275250_-1425|13.68|16|22	youxintian_mouse28026	NM_133780	Tpr	exonic	342
chr1:151351830-151354759+	0	0	0	0	0	0	0	2	0	6.58545	6.58545	6.58545	6.58545	6.58545	6.58545	6.58545	9.73278	6.58545	chr1	151351829	151354759	+		novel	NM_054102	Ivns1abp	exonic	376
chr1:151384317-151405545-	0	0	0	3	0	0	0	1	0	6.58545	6.58545	6.58545	10.4767	6.58545	6.58545	6.58545	8.88706	6.58545	chr1	151384316	151405545	-		novel	NM_025819	Swt1	exonic	1301
chr1:151388620-151403896-	0	0	0	0	0	0	0	0	0	6.58545	6.58545	6.58545	6.58545	6.58545	6.58545	6.58545	6.58545	6.58545	chr1	151388619	151403896	-		novel	NM_025819	Swt1	exonic	983
chr1:151391436-151405545-	0	0	0	2	0	0	0	0	0	6.58545	6.58545	6.58545	9.93954	6.58545	6.58545	6.58545	6.58545	6.58545	chr1	151391435	151405545	-		novel	NM_025819	Swt1	exonic	964
chr1:151473072-151478625-	0	0	0	0	0	0	2	0	0	6.58545	6.58545	6.58545	6.58545	6.58545	6.58545	9.74562	6.58545	6.58545	chr1	151473071	151478625	-	1_153325755_153320202_-5553|17.15|4|4	youxintian_mouse28026	NM_011277	Rnf2	exonic	739
chr1:151476140-151478625-	2	1	1	2	0	2	1	0	1	9.98053	8.73056	9.44345	9.93954	6.58545	9.62495	8.8986	6.58545	8.94889	chr1	151476139	151478625	-	mm9_circ_001489	circBase	NM_011277	Rnf2	exonic	466
chr1:151689519-151717495+	0	0	0	0	0	0	0	0	0	6.58545	6.58545	6.58545	6.58545	6.58545	6.58545	6.58545	6.58545	6.58545	chr1	151689518	151717495	+		novel	NM_022018	Fam129a	sense overlapping	27977
chr1:152841025-152846263-	0	0	0	0	0	0	0	0	0	6.58545	6.58545	6.58545	6.58545	6.58545	6.58545	6.58545	6.58545	6.58545	chr1	152841024	152846263	-		novel	NM_001005507	Smg7	exonic	1141
chr1:152854310-152856611-	0	2	0	0	0	0	0	1	0	6.58545	9.5575	6.58545	6.58545	6.58545	6.58545	6.58545	8.88706	6.58545	chr1	152854309	152856611	-	1_154703741_154701440_-2301|19.35|10|16	youxintian_mouse28026	NM_001005507	Smg7	exonic	388
chr1:153469600-153478189-	0	2	0	0	0	0	0	0	0	6.58545	9.5575	6.58545	6.58545	6.58545	6.58545	6.58545	6.58545	6.58545	chr1	153469599	153478189	-	1_155325319_155316730_-8589|12.83|8|9	youxintian_mouse28026	NM_007842	Dhx9	exonic	997
chr1:155173986-155187840+	0	0	0	0	1	0	0	2	2	6.58545	6.58545	6.58545	6.58545	8.98942	6.58545	6.58545	9.73278	9.80143	chr1	155173985	155187840	+	1_157034970_157021116_-13854|16.38|2|2	youxintian_mouse28026	NM_021433	Stx6	exonic	328
chr1:155173986-155197435+	1	3	1	3	4	8	2	2	3	9.11153	10.0798	9.44345	10.4767	10.769	11.487	9.74562	9.73278	10.3337	chr1	155173985	155197435	+	mm9_circ_013647	circBase	NM_021433	Stx6	exonic	656
chr1:155615867-155624958+	0	0	0	0	0	1	0	0	0	6.58545	6.58545	6.58545	6.58545	6.58545	8.79054	6.58545	6.58545	6.58545	chr1	155615866	155624958	+	1_157472088_157462997_-9091|18.96|6|7	youxintian_mouse28026	NM_028250	Acbd6	exonic	196
chr1:155944099-155962560-	0	0	0	0	0	0	3	0	0	6.58545	6.58545	6.58545	6.58545	6.58545	6.58545	10.2758	6.58545	6.58545	chr1	155944098	155962560	-	1_157809690_157791229_-18461|16.81|7|7	youxintian_mouse28026	NM_001039184	Cep350	exonic	1130
chr1:155953154-155962560-	3	9	3	6	2	7	6	12	0	10.519	11.5768	10.8892	11.4272	9.84625	11.3012	11.2188	12.1752	6.58545	chr1	155953153	155962560	-	mm9_circ_002304	circBase	NM_001039184	Cep350	exonic	1016
chr1:155958561-155962560-	0	1	0	0	1	1	1	0	0	6.58545	8.73056	6.58545	6.58545	8.98942	8.79054	8.8986	6.58545	6.58545	chr1	155958560	155962560	-	mm9_circ_000111	circBase	NM_001039184	Cep350	exonic	402
chr1:156439288-156440585-	0	1	0	0	0	2	0	0	0	6.58545	8.73056	6.58545	6.58545	6.58545	9.62495	6.58545	6.58545	6.58545	chr1	156439287	156440585	-	1_158370716_158369419_-1297|17.89|8|8	youxintian_mouse28026	NM_009230	Soat1	exonic	207
chr1:156869441-156907718-	0	0	0	0	0	0	0	0	1	6.58545	6.58545	6.58545	6.58545	6.58545	6.58545	6.58545	6.58545	8.94889	chr1	156869440	156907718	-	mm9_circ_004010	circBase	NM_023884	Ralgps2	exonic	630
chr1:156869441-156907778-	0	2	0	0	0	0	1	1	1	6.58545	9.5575	6.58545	6.58545	6.58545	6.58545	8.8986	8.88706	8.94889	chr1	156869440	156907778	-	mm9_circ_006421	circBase	NR_027640	Ralgps2	exonic	795
chr1:156900586-156907778-	0	0	4	0	0	0	0	0	0	6.58545	6.58545	11.2859	6.58545	6.58545	6.58545	6.58545	6.58545	6.58545	chr1	156900585	156907778	-	mm9_circ_015637	circBase	NR_027640	Ralgps2	exonic	296
chr1:160682041-160702460-	0	0	0	2	0	0	0	0	0	6.58545	6.58545	6.58545	9.93954	6.58545	6.58545	6.58545	6.58545	6.58545	chr1	160682040	160702460	-	1_162632591_162612172_-20419|16.50|17|29	youxintian_mouse28026	NM_013862	Rabgap1l	exonic	412
chr1:160682041-160710213-	1	0	0	0	2	0	0	0	0	9.11153	6.58545	6.58545	6.58545	9.84625	6.58545	6.58545	6.58545	6.58545	chr1	160682040	160710213	-	1_162640344_162612172_-28172|18.09|8|10	youxintian_mouse28026	NM_013862	Rabgap1l	exonic	479
chr1:160700712-160702460-	0	0	1	1	3	1	1	1	0	6.58545	6.58545	9.44345	9.07415	10.3801	8.79054	8.8986	8.88706	6.58545	chr1	160700711	160702460	-	1_162632591_162630843_-1748|17.08|23|106	youxintian_mouse28026	NM_013862	Rabgap1l	exonic	270
chr1:160954784-160962484+	0	2	0	0	0	0	0	0	0	6.58545	9.5575	6.58545	6.58545	6.58545	6.58545	6.58545	6.58545	6.58545	chr1	160954783	160962484	+	1_162892615_162884915_-7700|19.99|1|2	youxintian_mouse28026	NM_001024952	Rc3h1	exonic	900
chr1:161243575-161244342-	0	0	0	0	0	0	0	0	1	6.58545	6.58545	6.58545	6.58545	6.58545	6.58545	6.58545	6.58545	8.94889	chr1	161243574	161244342	-		novel	NM_007453	Prdx6	exonic	294
chr1:161856821-161862302-	0	0	0	0	0	0	0	0	0	6.58545	6.58545	6.58545	6.58545	6.58545	6.58545	6.58545	6.58545	6.58545	chr1	161856820	161862302	-		novel	NM_172645	Suco	exonic	555
chr1:162696278-162702390-	0	0	0	0	0	0	0	0	2	6.58545	6.58545	6.58545	6.58545	6.58545	6.58545	6.58545	6.58545	9.80143	chr1	162696277	162702390	-		novel	NM_001081290	Prrc2c	exonic	1291
chr1:162715392-162716361-	1	0	0	0	0	0	0	2	0	9.11153	6.58545	6.58545	6.58545	6.58545	6.58545	6.58545	9.73278	6.58545	chr1	162715391	162716361	-	1_164646492_164645523_-969|18.31|8|11	youxintian_mouse28026	NM_001081290	Prrc2c	exonic	305
chr1:163257761-163262015-	0	0	0	2	0	0	0	0	0	6.58545	6.58545	6.58545	9.93954	6.58545	6.58545	6.58545	6.58545	6.58545	chr1	163257760	163262015	-		novel	NM_011127	Prrx1	exonic	358
chr1:163933479-163934817+	0	0	0	0	0	1	0	0	0	6.58545	6.58545	6.58545	6.58545	6.58545	8.79054	6.58545	6.58545	6.58545	chr1	163933478	163934817	+	1_165864948_165863610_-1338|17.39|5|8	youxintian_mouse28026	NM_028776	Scyl3	exonic	401
chr1:165350884-165357546-	0	0	0	0	0	0	0	0	1	6.58545	6.58545	6.58545	6.58545	6.58545	6.58545	6.58545	6.58545	8.94889	chr1	165350883	165357546	-	1_167287677_167281015_-6662|10.03|14|24	youxintian_mouse28026	NM_028759	Dcaf6	exonic	700
chr1:165357429-165367505-	2	0	0	0	0	0	0	0	0	9.98053	6.58545	6.58545	6.58545	6.58545	6.58545	6.58545	6.58545	6.58545	chr1	165357428	165367505	-	1_167297636_167287560_-10076|19.59|2|2	youxintian_mouse28026	NM_028759	Dcaf6	sense overlapping	10077
chr1:165474954-165481014+	0	0	0	0	3	0	0	0	0	6.58545	6.58545	6.58545	6.58545	10.3801	6.58545	6.58545	6.58545	6.58545	chr1	165474953	165481014	+		novel	NM_027430	Mpc2	sense overlapping	6061
chr1:165601750-165608604-	0	0	0	1	0	0	1	0	0	6.58545	6.58545	6.58545	9.07415	6.58545	6.58545	8.8986	6.58545	6.58545	chr1	165601749	165608604	-	1_167538735_167531881_-6854|17.28|4|5	youxintian_mouse28026	NM_001083897	Mpzl1	exonic	620
chr1:165604610-165608604-	0	2	0	2	0	4	0	0	0	6.58545	9.5575	6.58545	9.93954	6.58545	10.5344	6.58545	6.58545	6.58545	chr1	165604609	165608604	-	mm9_circ_014443	circBase	NM_001001880	Mpzl1	exonic	514
chr1:167234692-167237648-	1	0	0	1	2	0	0	0	2	9.11153	6.58545	6.58545	9.07415	9.84625	6.58545	6.58545	6.58545	9.80143	chr1	167234691	167237648	-	mm9_circ_006877	circBase	NM_030724	Uck2	exonic	400
chr1:170150312-170166948-	0	0	0	0	0	0	0	0	0	6.58545	6.58545	6.58545	6.58545	6.58545	6.58545	6.58545	6.58545	6.58545	chr1	170150311	170166948	-		novel	NM_133806	Uap1	exonic	1212
chr1:170156924-170166948-	0	0	2	2	0	1	1	1	0	6.58545	6.58545	10.3404	9.93954	6.58545	8.79054	8.8986	8.88706	6.58545	chr1	170156923	170166948	-	1_172097079_172087055_-10024|19.24|3|3	youxintian_mouse28026	NM_133806	Uap1	exonic	877
chr1:170747106-170819432-	0	0	0	0	0	0	0	0	0	6.58545	6.58545	6.58545	6.58545	6.58545	6.58545	6.58545	6.58545	6.58545	chr1	170747105	170819432	-	1_172749563_172677237_-72326|19.57|5|7	youxintian_mouse28026	NM_001081304	Atf6	exonic	892
chr1:170787346-170799745-	0	0	0	0	0	0	0	0	0	6.58545	6.58545	6.58545	6.58545	6.58545	6.58545	6.58545	6.58545	6.58545	chr1	170787345	170799745	-	1_172729876_172717477_-12399|17.53|11|16	youxintian_mouse28026	NM_001081304	Atf6	exonic	529
chr1:170787346-170819432-	0	0	0	3	0	0	0	0	0	6.58545	6.58545	6.58545	10.4767	6.58545	6.58545	6.58545	6.58545	6.58545	chr1	170787345	170819432	-	1_172749563_172717477_-32086|19.01|11|20	youxintian_mouse28026	NM_001081304	Atf6	exonic	807
chr1:171356530-171437701+	0	2	0	0	0	0	0	0	1	6.58545	9.5575	6.58545	6.58545	6.58545	6.58545	6.58545	6.58545	8.94889	chr1	171356529	171437701	+		novel	NM_009480	Usf1	sense overlapping	81172
chr1:172173943-172187460+	0	0	0	0	3	2	1	1	4	6.58545	6.58545	6.58545	6.58545	10.3801	9.62495	8.8986	8.88706	10.7216	chr1	172173942	172187460	+		novel	NM_153555	Dcaf8	exonic	586
chr1:176866409-176878106+	0	0	0	0	0	0	0	0	0	6.58545	6.58545	6.58545	6.58545	6.58545	6.58545	6.58545	6.58545	6.58545	chr1	176866408	176878106	+		novel	NM_029756	Sdccag8	sense overlapping	11698
chr1:177096967-177109738-	0	0	0	0	0	2	0	1	0	6.58545	6.58545	6.58545	6.58545	6.58545	9.62495	6.58545	8.88706	6.58545	chr1	177096966	177109738	-	1_179039869_179027098_-12771|15.18|20|104	youxintian_mouse28026	NM_011785	Akt3	exonic	389
chr1:178242612-178244482+	0	0	0	0	0	2	0	0	0	6.58545	6.58545	6.58545	6.58545	6.58545	9.62495	6.58545	6.58545	6.58545	chr1	178242611	178244482	+	1_180174613_180172743_-1870|18.98|3|3	youxintian_mouse28026	NM_024282	Desi2	exonic	236
chr1:178323134-178325313-	2	2	1	1	0	1	1	3	2	9.98053	9.5575	9.44345	9.07415	6.58545	8.79054	8.8986	10.2624	9.80143	chr1	178323133	178325313	-	mm9_circ_002100	circBase	uc007dva.1	BC033430	sense overlapping	2180
chr1:178330296-178330651-	0	0	0	0	0	1	2	0	0	6.58545	6.58545	6.58545	6.58545	6.58545	8.79054	9.74562	6.58545	6.58545	chr1	178330295	178330651	-		novel	NM_016805	Hnrnpu	sense overlapping	356
chr1:178678826-178679359+	1	0	0	1	0	0	0	0	0	9.11153	6.58545	6.58545	9.07415	6.58545	6.58545	6.58545	6.58545	6.58545	chr1	178678825	178679359	+	mm9_circ_001703	circBase	NM_001161665	Kif26b	exonic	534
chr1:179289275-179289872-	0	0	0	0	0	0	0	0	2	6.58545	6.58545	6.58545	6.58545	6.58545	6.58545	6.58545	6.58545	9.80143	chr1	179289274	179289872	-	1_181220003_181219406_-597|18.56|8|13	youxintian_mouse28026	ENSMUST00000128302	Smyd3	intronic	598
chr1:179762545-179788339-	0	0	0	0	0	0	3	0	0	6.58545	6.58545	6.58545	6.58545	6.58545	6.58545	10.2758	6.58545	6.58545	chr1	179762544	179788339	-	1_181718470_181692676_-25794|16.15|9|15	youxintian_mouse28026	NM_026375	Ahctf1	exonic	3196
chr1:179784090-179786131-	3	0	1	0	0	0	0	0	1	10.519	6.58545	9.44345	6.58545	6.58545	6.58545	6.58545	6.58545	8.94889	chr1	179784089	179786131	-	1_181716262_181714221_-2041|17.81|16|53	youxintian_mouse28026	NM_026375	Ahctf1	exonic	282
chr1:179999362-180040200+	0	0	0	0	0	0	0	0	0	6.58545	6.58545	6.58545	6.58545	6.58545	6.58545	6.58545	6.58545	6.58545	chr1	179999361	180040200	+	1_181970331_181929493_-40838|19.79|19|66	youxintian_mouse28026	NM_001033285	Cdc42bpa	exonic	421
chr1:180101025-180117743+	1	2	0	0	0	2	1	0	0	9.11153	9.5575	6.58545	6.58545	6.58545	9.62495	8.8986	6.58545	6.58545	chr1	180101024	180117743	+	1_182047874_182031156_-16718|14.88|9|16	youxintian_mouse28026	NM_001033285	Cdc42bpa	exonic	903
chr1:180733166-180738637+	2	5	0	1	7	4	1	6	0	9.98053	10.7647	6.58545	9.07415	11.5419	10.5344	8.8986	11.2049	6.58545	chr1	180733165	180738637	+	1_182668768_182663297_-5471|17.29|12|18	youxintian_mouse28026	NM_133225	Acbd3	exonic	617
chr1:181109160-181123984-	0	0	1	0	0	0	0	0	0	6.58545	6.58545	9.44345	6.58545	6.58545	6.58545	6.58545	6.58545	6.58545	chr1	181109159	181123984	-	1_183054115_183039291_-14824|17.35|14|20	youxintian_mouse28026	NM_026171	Nvl	exonic	900
chr1:181181304-181186067-	2	0	0	0	0	0	0	0	0	9.98053	6.58545	6.58545	6.58545	6.58545	6.58545	6.58545	6.58545	6.58545	chr1	181181303	181186067	-		novel	NM_145514	Wdr26	exonic	661
chr1:181183727-181184396-	0	0	0	0	0	0	0	0	0	6.58545	6.58545	6.58545	6.58545	6.58545	6.58545	6.58545	6.58545	6.58545	chr1	181183726	181184396	-	1_183114527_183113858_-669|16.65|5|7	youxintian_mouse28026	NM_145514	Wdr26	exonic	225
chr1:181825622-181832232-	7	1	2	0	2	2	1	0	1	11.6864	8.73056	10.3404	6.58545	9.84625	9.62495	8.8986	6.58545	8.94889	chr1	181825621	181832232	-	mm9_circ_003826	circBase	NM_133815	Lbr	exonic	529
chr1:181917199-181923840-	0	0	0	0	0	0	0	0	0	6.58545	6.58545	6.58545	6.58545	6.58545	6.58545	6.58545	6.58545	6.58545	chr1	181917198	181923840	-		novel	NM_008680	Enah	exonic	1682
chr1:181956394-181961919-	0	1	0	0	0	0	0	0	2	6.58545	8.73056	6.58545	6.58545	6.58545	6.58545	6.58545	6.58545	9.80143	chr1	181956393	181961919	-	mm9_circ_017328	circBase	NM_008680	Enah	exonic	344
chr1:182616270-182623983+	0	0	0	1	0	0	0	0	0	6.58545	6.58545	6.58545	9.07415	6.58545	6.58545	6.58545	6.58545	6.58545	chr1	182616269	182623983	+		novel	NM_130890	Capn8	sense overlapping	7714
chr1:183135355-183135876-	1	0	0	0	4	1	0	2	0	9.11153	6.58545	6.58545	6.58545	10.769	8.79054	6.58545	9.73278	6.58545	chr1	183135354	183135876	-		novel	NM_026866	Disp1	exonic	522
chr1:183149970-183150133-	1	0	0	0	2	0	0	0	0	9.11153	6.58545	6.58545	6.58545	9.84625	6.58545	6.58545	6.58545	6.58545	chr1	183149969	183150133	-		novel	NM_001278219	Disp1	intronic	164
chr1:185266901-185267279+	0	4	0	0	1	0	1	0	0	6.58545	10.4625	6.58545	6.58545	8.98942	6.58545	8.8986	6.58545	6.58545	chr1	185266900	185267279	+	1_187091158_187090780_-378|16.06|19|73	youxintian_mouse28026	NM_001163754	Rab3gap2	exonic	281
chr1:185386246-185397267+	1	1	1	1	0	2	3	3	1	9.11153	8.73056	9.44345	9.07415	6.58545	9.62495	10.2758	10.2624	8.94889	chr1	185386245	185397267	+	mm9_circ_005659	circBase	NM_029735	Eprs	exonic	601
chr1:185463250-185463493+	0	0	0	0	0	2	0	0	0	6.58545	6.58545	6.58545	6.58545	6.58545	9.62495	6.58545	6.58545	6.58545	chr1	185463249	185463493	+		novel	ENSMUST00000061093	Slc30a10	intronic	244
chr1:187225503-187233826+	0	0	0	2	0	0	0	0	0	6.58545	6.58545	6.58545	9.93954	6.58545	6.58545	6.58545	6.58545	6.58545	chr1	187225502	187233826	+	1_189057705_189049382_-8323|11.96|7|14	youxintian_mouse28026	NM_026367	Gpatch2	exonic	1042
chr1:188146313-188198845+	0	0	0	2	0	0	0	0	0	6.58545	6.58545	6.58545	9.93954	6.58545	6.58545	6.58545	6.58545	6.58545	chr1	188146312	188198845	+		novel	NM_011935	Esrrg	exonic	543
chr1:189786636-189798681+	0	1	0	0	4	0	0	2	2	6.58545	8.73056	6.58545	6.58545	10.769	6.58545	6.58545	9.73278	9.80143	chr1	189786635	189798681	+	mm9_circ_016374	circBase	NM_008976	Ptpn14	exonic	483
chr1:190146952-190162313-	0	0	0	1	0	0	0	0	0	6.58545	6.58545	6.58545	9.07415	6.58545	6.58545	6.58545	6.58545	6.58545	chr1	190146951	190162313	-	1_191986192_191970831_-15361|14.89|15|54	youxintian_mouse28026	NM_008937	Prox1	exonic	2095
chr1:190871592-190899571-	0	3	0	0	2	3	0	0	1	6.58545	10.0798	6.58545	6.58545	9.84625	10.1502	6.58545	6.58545	8.94889	chr1	190871591	190899571	-	mm9_circ_012003	circBase	NM_178775	Rps6kc1	exonic	691
chr1:190885334-190899571-	1	0	0	0	0	0	2	1	0	9.11153	6.58545	6.58545	6.58545	6.58545	6.58545	9.74562	8.88706	6.58545	chr1	190885333	190899571	-	mm9_circ_005949	circBase	NM_178775	Rps6kc1	exonic	331
chr1:191368641-191372666-	0	0	0	0	0	0	0	2	0	6.58545	6.58545	6.58545	6.58545	6.58545	6.58545	6.58545	9.73278	6.58545	chr1	191368640	191372666	-		novel	NM_144880	Ppp2r5a	exonic	299
chr1:192108644-192130460-	0	0	0	0	0	2	0	0	0	6.58545	6.58545	6.58545	6.58545	6.58545	9.62495	6.58545	6.58545	6.58545	chr1	192108643	192130460	-		novel	NM_001290278	Rcor3	exonic	852
chr1:192116269-192130460-	0	0	0	2	2	0	0	1	1	6.58545	6.58545	6.58545	9.93954	9.84625	6.58545	6.58545	8.88706	8.94889	chr1	192116268	192130460	-	1_193954341_193940150_-14191|16.51|16|48	youxintian_mouse28026	NM_144814	Rcor3	exonic	794
chr1:193338806-193340901+	0	0	0	0	0	0	0	2	0	6.58545	6.58545	6.58545	6.58545	6.58545	6.58545	6.58545	9.73278	6.58545	chr1	193338805	193340901	+		novel	NM_008484	Lamb3	exonic	681
chr1:194643686-194649638+	0	0	0	0	0	0	0	0	2	6.58545	6.58545	6.58545	6.58545	6.58545	6.58545	6.58545	6.58545	9.80143	chr1	194643685	194649638	+	1_196475832_196469880_-5952|20.48|12|22	youxintian_mouse28026	NM_008882	Plxna2	exonic	1445
chr10:4367678-4374754-	0	3	0	0	0	0	1	0	0	6.58545	10.0798	6.58545	6.58545	6.58545	6.58545	8.8986	6.58545	6.58545	chr10	4367677	4374754	-		novel	NM_001033466	Zbtb2	sense overlapping	7077
chr10:4862462-4921758+	0	3	0	0	0	0	0	0	0	6.58545	10.0798	6.58545	6.58545	6.58545	6.58545	6.58545	6.58545	6.58545	chr10	4862461	4921758	+		novel	ENSMUST00000067086	Esr1	intronic	59297
chr10:6900570-6920086-	0	2	0	0	0	0	0	0	0	6.58545	9.5575	6.58545	6.58545	6.58545	6.58545	6.58545	6.58545	6.58545	chr10	6900569	6920086	-		novel	NM_001170800	Ipcef1	exonic	567
chr10:7152864-7154485-	0	0	0	1	0	0	0	1	1	6.58545	6.58545	6.58545	9.07415	6.58545	6.58545	6.58545	8.88706	8.94889	chr10	7152863	7154485	-		novel	NM_172546	Cnksr3	exonic	291
chr10:7152864-7160807-	0	0	1	0	0	0	0	2	0	6.58545	6.58545	9.44345	6.58545	6.58545	6.58545	6.58545	9.73278	6.58545	chr10	7152863	7160807	-		novel	NM_172546	Cnksr3	exonic	455
chr10:7701610-7703120+	1	1	0	0	2	1	0	1	0	9.11153	8.73056	6.58545	6.58545	9.84625	8.79054	6.58545	8.88706	6.58545	chr10	7701609	7703120	+	10_7422918_7421408_-1510|13.07|2|3	youxintian_mouse28026	NM_010690	Lats1	exonic	1511
chr10:8847570-8847772-	0	3	0	0	0	0	0	0	0	6.58545	10.0798	6.58545	6.58545	6.58545	6.58545	6.58545	6.58545	6.58545	chr10	8847569	8847772	-		novel	ENSMUST00000015449	Sash1	intronic	203
chr10:9767158-9778071-	0	0	0	0	0	0	0	3	0	6.58545	6.58545	6.58545	6.58545	6.58545	6.58545	6.58545	10.2624	6.58545	chr10	9767157	9778071	-		novel	NM_001081344	Stxbp5	exonic	939
chr10:9798122-9800068-	0	0	0	0	0	0	0	0	0	6.58545	6.58545	6.58545	6.58545	6.58545	6.58545	6.58545	6.58545	6.58545	chr10	9798121	9800068	-	mm9_circ_010719	circBase	NM_001081344	Stxbp5	exonic	278
chr10:9798122-9812407-	0	0	0	0	0	0	0	0	0	6.58545	6.58545	6.58545	6.58545	6.58545	6.58545	6.58545	6.58545	6.58545	chr10	9798121	9812407	-		novel	NM_001081344	Stxbp5	exonic	935
chr10:12401311-12415489-	0	2	0	0	0	0	0	0	0	6.58545	9.5575	6.58545	6.58545	6.58545	6.58545	6.58545	6.58545	6.58545	chr10	12401310	12415489	-		novel	NM_011682	Utrn	exonic	773
chr10:12421597-12455564-	0	0	0	0	0	0	0	0	0	6.58545	6.58545	6.58545	6.58545	6.58545	6.58545	6.58545	6.58545	6.58545	chr10	12421596	12455564	-	10_12175362_12141395_-33967|15.16|8|11	youxintian_mouse28026	NM_011682	Utrn	exonic	862
chr10:12436281-12455564-	1	0	1	9	2	4	2	4	3	9.11153	6.58545	9.44345	11.9953	9.84625	10.5344	9.74562	10.649	10.3337	chr10	12436280	12455564	-	mm9_circ_009056	circBase	NM_011682	Utrn	exonic	725
chr10:12525338-12538213-	0	0	0	0	1	1	0	0	0	6.58545	6.58545	6.58545	6.58545	8.98942	8.79054	6.58545	6.58545	6.58545	chr10	12525337	12538213	-	10_12258011_12245136_-12875|22.71|2|3	youxintian_mouse28026	NM_011682	Utrn	exonic	330
chr10:12633944-12649218-	0	0	0	0	0	0	2	0	0	6.58545	6.58545	6.58545	6.58545	6.58545	6.58545	9.74562	6.58545	6.58545	chr10	12633943	12649218	-		novel	NM_011682	Utrn	exonic	764
chr10:12633944-12654834-	0	1	0	0	2	0	0	0	0	6.58545	8.73056	6.58545	6.58545	9.84625	6.58545	6.58545	6.58545	6.58545	chr10	12633943	12654834	-	10_12374632_12353742_-20890|21.76|2|3	youxintian_mouse28026	NM_011682	Utrn	exonic	1050
chr10:12643403-12688427-	0	0	0	0	0	0	0	0	0	6.58545	6.58545	6.58545	6.58545	6.58545	6.58545	6.58545	6.58545	6.58545	chr10	12643402	12688427	-		novel	NM_011682	Utrn	exonic	3117
chr10:13985552-14066684+	0	0	0	0	2	0	0	0	0	6.58545	6.58545	6.58545	6.58545	9.84625	6.58545	6.58545	6.58545	6.58545	chr10	13985551	14066684	+		novel	NM_010437	Hivep2	sense overlapping	81133
chr10:14004198-14093912+	0	0	0	0	0	0	0	0	0	6.58545	6.58545	6.58545	6.58545	6.58545	6.58545	6.58545	6.58545	6.58545	chr10	14004197	14093912	+		novel	NM_010437	Hivep2	sense overlapping	89715
chr10:14004201-14066684+	2	0	0	2	0	1	0	1	3	9.98053	6.58545	6.58545	9.93954	6.58545	8.79054	6.58545	8.88706	10.3337	chr10	14004200	14066684	+	mm9_circ_004997	circBase	uc007elg.1	Hivep2	exonic	177
chr10:18089448-18096336+	0	2	1	1	1	0	1	0	1	6.58545	9.5575	9.44345	9.07415	8.98942	6.58545	8.8986	6.58545	8.94889	chr10	18089447	18096336	+	mm9_circ_017446	circBase	NM_009048	Reps1	exonic	982
chr10:18092845-18094908+	0	2	0	0	1	0	0	0	0	6.58545	9.5575	6.58545	6.58545	8.98942	6.58545	6.58545	6.58545	6.58545	chr10	18092844	18094908	+	mm9_circ_017338	circBase	NM_009048	Reps1	exonic	703
chr10:20076482-20082468+	0	0	0	0	0	0	0	0	0	6.58545	6.58545	6.58545	6.58545	6.58545	6.58545	6.58545	6.58545	6.58545	chr10	20076481	20082468	+	10_19802274_19796288_-5986|20.82|7|10	youxintian_mouse28026	NM_008580	Map3k5	exonic	228
chr10:20438725-20443369-	0	0	0	0	0	0	0	0	0	6.58545	6.58545	6.58545	6.58545	6.58545	6.58545	6.58545	6.58545	6.58545	chr10	20438724	20443369	-		novel	NM_013875	Pde7b	exonic	312
chr10:20569719-20572974-	0	0	0	0	0	2	0	0	0	6.58545	6.58545	6.58545	6.58545	6.58545	9.62495	6.58545	6.58545	6.58545	chr10	20569718	20572974	-		novel	ENSMUST00000170265	Pde7b	intronic	3256
chr10:21130222-21130474-	0	0	0	0	2	0	0	0	0	6.58545	6.58545	6.58545	6.58545	9.84625	6.58545	6.58545	6.58545	6.58545	chr10	21130221	21130474	-		novel	uc011xbd.1	Myb	intronic	253
chr10:22705693-22712091-	1	0	0	1	0	1	0	0	0	9.11153	6.58545	6.58545	9.07415	6.58545	8.79054	6.58545	6.58545	6.58545	chr10	22705692	22712091	-	mm9_circ_005086	circBase	NM_011603	Tbpl1	sense overlapping	6399
chr10:23798746-23806040+	0	0	0	0	2	1	4	0	0	6.58545	6.58545	6.58545	6.58545	9.84625	8.79054	10.6626	6.58545	6.58545	chr10	23798745	23806040	+	mm9_circ_011389	circBase	NM_183116	Slc18b1	exonic	458
chr10:25220611-25289730-	3	1	0	4	6	4	3	4	5	10.519	8.73056	6.58545	10.8672	11.3272	10.5344	10.2758	10.649	11.0271	chr10	25220610	25289730	-	mm9_circ_000741	circBase	NM_018747	Akap7	exonic	840
chr10:25267308-25289730-	1	0	1	0	0	6	3	3	1	9.11153	6.58545	9.44345	6.58545	6.58545	11.0879	10.2758	10.2624	8.94889	chr10	25267307	25289730	-	mm9_circ_010383	circBase	NM_018747	Akap7	exonic	579
chr10:25441573-25443954+	0	0	0	0	0	0	0	0	2	6.58545	6.58545	6.58545	6.58545	6.58545	6.58545	6.58545	6.58545	9.80143	chr10	25441572	25443954	+	10_25163760_25161379_-2381|17.10|16|31	youxintian_mouse28026	NM_013511	Epb4.1l2	exonic	698
chr10:25441573-25473163+	0	0	0	0	0	1	0	0	0	6.58545	6.58545	6.58545	6.58545	6.58545	8.79054	6.58545	6.58545	6.58545	chr10	25441572	25473163	+		novel	NM_013511	Epb4.1l2	exonic	1229
chr10:28263501-28263772+	0	0	0	3	0	0	0	0	0	6.58545	6.58545	6.58545	10.4767	6.58545	6.58545	6.58545	6.58545	6.58545	chr10	28263500	28263772	+	10_27983578_27983307_-271|13.57|3|4	youxintian_mouse28026	NM_008983	Ptprk	exonic	272
chr10:28334476-28354779+	0	0	0	0	0	0	0	2	0	6.58545	6.58545	6.58545	6.58545	6.58545	6.58545	6.58545	9.73278	6.58545	chr10	28334475	28354779	+	10_28074585_28054282_-20303|20.49|8|14	youxintian_mouse28026	NM_008983	Ptprk	exonic	373
chr10:31517384-31534896-	2	0	0	0	0	0	1	0	0	9.98053	6.58545	6.58545	6.58545	6.58545	6.58545	8.8986	6.58545	6.58545	chr10	31517383	31534896	-	mm9_circ_015992	circBase	NM_001146349	Rnf217	exonic	399
chr10:33948972-33949159-	0	0	0	0	0	0	0	0	0	6.58545	6.58545	6.58545	6.58545	6.58545	6.58545	6.58545	6.58545	6.58545	chr10	33948971	33949159	-		novel	NM_028287	Zufsp	sense overlapping	188
chr10:34583898-34591970+	1	0	0	0	1	1	3	0	2	9.11153	6.58545	6.58545	6.58545	8.98942	8.79054	10.2758	6.58545	9.80143	chr10	34583897	34591970	+		novel	NM_010237	Frk	exonic	492
chr10:39639220-39641394+	0	0	0	0	2	0	0	0	0	6.58545	6.58545	6.58545	6.58545	9.84625	6.58545	6.58545	6.58545	6.58545	chr10	39639219	39641394	+		novel	NM_134000	Traf3ip2	exonic	268
chr10:39742691-39799977+	0	2	0	0	0	0	1	5	0	6.58545	9.5575	6.58545	6.58545	6.58545	6.58545	8.8986	10.9535	6.58545	chr10	39742690	39799977	+	10_39519783_39462497_-57286|11.67|17|37	youxintian_mouse28026	uc007ewc.1	Rev3l	exonic	651
chr10:39742691-39814090+	0	0	0	0	0	0	0	2	0	6.58545	6.58545	6.58545	6.58545	6.58545	6.58545	6.58545	9.73278	6.58545	chr10	39742690	39814090	+	10_39533896_39462497_-71399|15.20|5|5	youxintian_mouse28026	uc007ewc.1	Rev3l	exonic	1205
chr10:39835160-39841003+	0	0	2	0	0	0	0	0	0	6.58545	6.58545	10.3404	6.58545	6.58545	6.58545	6.58545	6.58545	6.58545	chr10	39835159	39841003	+		novel	NM_011264	Rev3l	exonic	540
chr10:40254264-40254464-	0	0	0	2	0	2	0	0	0	6.58545	6.58545	6.58545	9.93954	6.58545	9.62495	6.58545	6.58545	6.58545	chr10	40254263	40254464	-	mm9_circ_018856	circBase	NM_026113	Gtf3c6	exonic	109
chr10:40434304-40436212+	0	0	0	0	0	0	0	0	0	6.58545	6.58545	6.58545	6.58545	6.58545	6.58545	6.58545	6.58545	6.58545	chr10	40434303	40436212	+	10_40156018_40154110_-1908|17.30|5|11	youxintian_mouse28026	NM_198164	Cdk19	exonic	252
chr10:40434346-40436212+	0	2	0	0	0	0	0	0	0	6.58545	9.5575	6.58545	6.58545	6.58545	6.58545	6.58545	6.58545	6.58545	chr10	40434345	40436212	+		novel	NM_198164	Cdk19	sense overlapping	1867
chr10:40481121-40481305+	0	0	2	0	0	0	0	0	0	6.58545	6.58545	10.3404	6.58545	6.58545	6.58545	6.58545	6.58545	6.58545	chr10	40481120	40481305	+		novel	NM_198164	Cdk19	sense overlapping	185
chr10:41521918-41524145+	0	0	0	0	0	2	1	1	0	6.58545	6.58545	6.58545	6.58545	6.58545	9.62495	8.8986	8.88706	6.58545	chr10	41521917	41524145	+	10_41243951_41241724_-2227|16.28|10|13	youxintian_mouse28026	NM_016898	Cd164	exonic	201
chr10:41528873-41529572+	0	0	0	2	0	0	0	0	0	6.58545	6.58545	6.58545	9.93954	6.58545	6.58545	6.58545	6.58545	6.58545	chr10	41528872	41529572	+		novel	NM_016898	Cd164	sense overlapping	700
chr10:41740840-41745921-	0	0	0	0	0	0	2	0	0	6.58545	6.58545	6.58545	6.58545	6.58545	6.58545	9.74562	6.58545	6.58545	chr10	41740839	41745921	-	10_41465727_41460646_-5081|22.38|3|3	youxintian_mouse28026	NM_026643	Cep57l1	exonic	453
chr10:42789300-42797733+	0	0	0	0	0	0	2	0	1	6.58545	6.58545	6.58545	6.58545	6.58545	6.58545	9.74562	6.58545	8.94889	chr10	42789299	42797733	+	10_42517539_42509106_-8433|22.34|14|57	youxintian_mouse28026	NM_153055	Sec63	exonic	400
chr10:42815055-42816469+	0	0	0	0	0	0	0	0	0	6.58545	6.58545	6.58545	6.58545	6.58545	6.58545	6.58545	6.58545	6.58545	chr10	42815054	42816469	+		novel	NM_153055	Sec63	exonic	261
chr10:43393871-43413547+	2	1	1	0	0	0	0	0	0	9.98053	8.73056	9.44345	6.58545	6.58545	6.58545	6.58545	6.58545	6.58545	chr10	43393870	43413547	+	mm9_circ_016668	circBase	NM_027772	Pdss2	exonic	339
chr10:43509847-43511988+	0	0	0	0	0	0	0	0	0	6.58545	6.58545	6.58545	6.58545	6.58545	6.58545	6.58545	6.58545	6.58545	chr10	43509846	43511988	+		novel	NM_199028	Bend3	sense overlapping	2142
chr10:43986251-43992705-	0	0	0	0	0	0	0	0	0	6.58545	6.58545	6.58545	6.58545	6.58545	6.58545	6.58545	6.58545	6.58545	chr10	43986250	43992705	-		novel	NM_172393	Aim1	exonic	467
chr10:43997052-43999347-	0	0	0	0	0	0	0	0	0	6.58545	6.58545	6.58545	6.58545	6.58545	6.58545	6.58545	6.58545	6.58545	chr10	43997051	43999347	-		novel	NM_172393	Aim1	exonic	2296
chr10:45648591-45672439+	0	0	0	0	0	0	0	2	0	6.58545	6.58545	6.58545	6.58545	6.58545	6.58545	6.58545	9.73278	6.58545	chr10	45648590	45672439	+		novel	NM_172473	Hace1	exonic	1061
chr10:50617712-50660726+	2	0	0	0	0	0	0	0	0	9.98053	6.58545	6.58545	6.58545	6.58545	6.58545	6.58545	6.58545	6.58545	chr10	50617711	50660726	+	10_50380532_50337518_-43014|15.57|9|10	youxintian_mouse28026	NM_198007	Ascc3	exonic	1913
chr10:50748806-50767507+	2	4	0	3	2	0	5	2	1	9.98053	10.4625	6.58545	10.4767	9.84625	6.58545	10.9673	9.73278	8.94889	chr10	50748805	50767507	+	10_50487313_50468612_-18701|16.81|18|155	youxintian_mouse28026	NM_198007	Ascc3	exonic	765
chr10:50767091-50767507+	0	0	0	0	0	0	1	0	0	6.58545	6.58545	6.58545	6.58545	6.58545	6.58545	8.8986	6.58545	6.58545	chr10	50767090	50767507	+	10_50487313_50486897_-416|14.03|5|11	youxintian_mouse28026	NM_198007	Ascc3	exonic	247
chr10:52261727-52261939+	0	2	0	0	0	0	0	0	0	6.58545	9.5575	6.58545	6.58545	6.58545	6.58545	6.58545	6.58545	6.58545	chr10	52261726	52261939	+		novel	NM_025705	Dcbld1	exonic	213
chr10:52346049-52349236-	0	0	0	0	0	0	0	0	0	6.58545	6.58545	6.58545	6.58545	6.58545	6.58545	6.58545	6.58545	6.58545	chr10	52346048	52349236	-		novel	NM_053187	Gopc	exonic	346
chr10:52429193-52436663+	0	2	0	1	0	1	0	6	0	6.58545	9.5575	6.58545	9.07415	6.58545	8.79054	6.58545	11.2049	6.58545	chr10	52429192	52436663	+	mm9_circ_014703	circBase	NM_030250	Nus1	sense overlapping	7471
chr10:52544607-52545267+	0	0	0	0	0	0	0	2	0	6.58545	6.58545	6.58545	6.58545	6.58545	6.58545	6.58545	9.73278	6.58545	chr10	52544606	52545267	+		novel	NR_037920	Zfa-ps	antisense	661
chr10:52544607-52545267-	0	3	0	0	1	0	2	0	2	6.58545	10.0798	6.58545	6.58545	8.98942	6.58545	9.74562	6.58545	9.80143	chr10	52544606	52545267	-		novel	NR_037920	Zfa-ps	sense overlapping	661
chr10:53333884-53334041-	0	0	0	0	0	0	0	0	0	6.58545	6.58545	6.58545	6.58545	6.58545	6.58545	6.58545	6.58545	6.58545	chr10	53333883	53334041	-		novel	ENSMUST00000095691	Cep85l	intronic	158
chr10:53611352-53626034-	0	0	0	1	2	0	0	0	0	6.58545	6.58545	6.58545	9.07415	9.84625	6.58545	6.58545	6.58545	6.58545	chr10	53611351	53626034	-	10_53345840_53331158_-14682|19.74|16|37	youxintian_mouse28026	NM_027830	Mcm9	exonic	1165
chr10:53674566-53690148-	0	0	0	0	0	0	0	0	3	6.58545	6.58545	6.58545	6.58545	6.58545	6.58545	6.58545	6.58545	10.3337	chr10	53674565	53690148	-	10_53409954_53394372_-15582|15.87|17|78	youxintian_mouse28026	NM_001081428	Fam184a	exonic	756
chr10:53977023-54030794-	0	0	0	0	0	0	0	2	0	6.58545	6.58545	6.58545	6.58545	6.58545	6.58545	6.58545	9.73278	6.58545	chr10	53977022	54030794	-	10_53750600_53696829_-53771|17.77|7|15	youxintian_mouse28026	NM_008548	Man1a	exonic	389
chr10:56123511-56215118-	0	0	0	0	0	0	0	2	0	6.58545	6.58545	6.58545	6.58545	6.58545	6.58545	6.58545	9.73278	6.58545	chr10	56123510	56215118	-		novel	NM_001033385	Tbc1d32	exonic	2247
chr10:56150794-56162212-	0	0	0	0	0	2	0	0	0	6.58545	6.58545	6.58545	6.58545	6.58545	9.62495	6.58545	6.58545	6.58545	chr10	56150793	56162212	-	10_55882018_55870600_-11418|18.84|2|2	youxintian_mouse28026	NM_001033385	Tbc1d32	exonic	631
chr10:58272333-58298865+	0	0	0	0	0	0	0	0	0	6.58545	6.58545	6.58545	6.58545	6.58545	6.58545	6.58545	6.58545	6.58545	chr10	58272332	58298865	+		novel	NM_027375	Gcc2	exonic	2209
chr10:58287363-58287640+	0	0	0	0	0	0	2	0	0	6.58545	6.58545	6.58545	6.58545	6.58545	6.58545	9.74562	6.58545	6.58545	chr10	58287362	58287640	+		novel	ENSMUST00000057659	Gcc2	intronic	278
chr10:58410053-58412553+	0	1	0	0	0	0	0	0	2	6.58545	8.73056	6.58545	6.58545	6.58545	6.58545	6.58545	6.58545	9.80143	chr10	58410052	58412553	+		novel	NM_026148	Lims1	exonic	301
chr10:59166504-59178857-	0	1	1	0	0	0	0	1	0	6.58545	8.73056	9.44345	6.58545	6.58545	6.58545	6.58545	8.88706	6.58545	chr10	59166503	59178857	-	10_58641605_58629252_-12353|15.90|9|15	youxintian_mouse28026	NM_001024910	Sept10	exonic	587
chr10:59583141-59583316-	0	0	0	0	0	0	0	0	2	6.58545	6.58545	6.58545	6.58545	6.58545	6.58545	6.58545	6.58545	9.80143	chr10	59583140	59583316	-		novel	ENSMUST00000020312	Mcu	intronic	176
chr10:59727957-59733157+	0	0	1	0	0	0	0	0	0	6.58545	6.58545	9.44345	6.58545	6.58545	6.58545	6.58545	6.58545	6.58545	chr10	59727956	59733157	+	10_59195905_59190705_-5200|15.84|2|2	youxintian_mouse28026	NM_144822	Micu1	exonic	337
chr10:59892672-59893017+	0	0	0	0	0	2	0	0	0	6.58545	6.58545	6.58545	6.58545	6.58545	9.62495	6.58545	6.58545	6.58545	chr10	59892671	59893017	+		novel	NM_019965	Dnajb12	exonic	266
chr10:61778042-61778194-	0	0	0	0	0	0	0	0	0	6.58545	6.58545	6.58545	6.58545	6.58545	6.58545	6.58545	6.58545	6.58545	chr10	61778041	61778194	-		novel	ENSMUST00000020283	H2afy2	intronic	153
chr10:62633977-62647201-	0	0	0	0	0	0	0	2	0	6.58545	6.58545	6.58545	6.58545	6.58545	6.58545	6.58545	9.73278	6.58545	chr10	62633976	62647201	-		novel	NM_053183	Ddx50	exonic	1143
chr10:62639861-62647201-	0	0	0	0	0	0	0	0	0	6.58545	6.58545	6.58545	6.58545	6.58545	6.58545	6.58545	6.58545	6.58545	chr10	62639860	62647201	-		novel	NM_053183	Ddx50	exonic	993
chr10:62751743-62791042-	0	0	0	0	0	0	0	0	2	6.58545	6.58545	6.58545	6.58545	6.58545	6.58545	6.58545	6.58545	9.80143	chr10	62751742	62791042	-	10_62253790_62214491_-39299|20.87|4|5	youxintian_mouse28026	NM_026201	Ccar1	exonic	2690
chr10:62770855-62772065-	2	2	0	0	0	0	0	0	0	9.98053	9.5575	6.58545	6.58545	6.58545	6.58545	6.58545	6.58545	6.58545	chr10	62770854	62772065	-	10_62234813_62233603_-1210|15.40|9|15	youxintian_mouse28026	NM_026201	Ccar1	exonic	292
chr10:63015802-63017337-	0	0	0	0	0	0	0	2	0	6.58545	6.58545	6.58545	6.58545	6.58545	6.58545	6.58545	9.73278	6.58545	chr10	63015801	63017337	-		novel	NM_001079824	Hnrnph3	exonic	441
chr10:63015802-63017610-	0	2	0	0	1	0	2	0	0	6.58545	9.5575	6.58545	6.58545	8.98942	6.58545	9.74562	6.58545	6.58545	chr10	63015801	63017610	-	10_62480358_62478550_-1808|20.23|9|18	youxintian_mouse28026	NM_001079824	Hnrnph3	exonic	528
chr10:63285374-63285720+	0	0	0	0	0	2	0	0	0	6.58545	6.58545	6.58545	6.58545	6.58545	9.62495	6.58545	6.58545	6.58545	chr10	63285373	63285720	+		novel	AK049533		intronic	347
chr10:63289052-63299239+	0	0	0	0	0	0	0	0	0	6.58545	6.58545	6.58545	6.58545	6.58545	6.58545	6.58545	6.58545	6.58545	chr10	63289051	63299239	+	10_62761987_62751800_-10187|15.19|2|3	youxintian_mouse28026	NM_026101	Herc4	exonic	483
chr10:67157907-67189849+	1	1	3	1	0	1	2	1	2	9.11153	8.73056	10.8892	9.07415	6.58545	8.79054	9.74562	8.88706	9.80143	chr10	67157906	67189849	+	mm9_circ_018701	circBase	NM_207221	Jmjd1c	exonic	279
chr10:68118251-68128993-	0	2	0	0	0	0	0	0	0	6.58545	9.5575	6.58545	6.58545	6.58545	6.58545	6.58545	6.58545	6.58545	chr10	68118250	68128993	-		novel	NM_023598	Arid5b	exonic	356
chr10:68126699-68128993-	1	0	0	0	0	2	0	0	0	9.11153	6.58545	6.58545	6.58545	6.58545	9.62495	6.58545	6.58545	6.58545	chr10	68126698	68128993	-		novel	NM_023598	Arid5b	exonic	258
chr10:70142579-70154836+	0	1	0	2	0	2	1	0	1	6.58545	8.73056	6.58545	9.93954	6.58545	9.62495	8.8986	6.58545	8.94889	chr10	70142578	70154836	+	10_69617584_69605327_-12257|18.41|13|42	youxintian_mouse28026	NM_001111121	Ccdc6	exonic	279
chr10:73468577-73469524+	0	2	0	0	0	0	0	0	0	6.58545	9.5575	6.58545	6.58545	6.58545	6.58545	6.58545	6.58545	6.58545	chr10	73468576	73469524	+		novel	AK138135		intronic	948
chr10:74210367-74230380+	0	0	0	0	0	2	0	0	0	6.58545	6.58545	6.58545	6.58545	6.58545	9.62495	6.58545	6.58545	6.58545	chr10	74210366	74230380	+	10_73693125_73673112_-20013|20.26|9|19	youxintian_mouse28026	NM_023115	Pcdh15	exonic	402
chr10:75245079-75261957+	0	1	0	0	0	0	0	1	0	6.58545	8.73056	6.58545	6.58545	6.58545	6.58545	6.58545	8.88706	6.58545	chr10	75245078	75261957	+	10_74724702_74707824_-16878|15.23|14|35	youxintian_mouse28026	NM_153406	Specc1l	exonic	2256
chr10:75257868-75263370+	0	0	0	0	0	0	2	0	0	6.58545	6.58545	6.58545	6.58545	6.58545	6.58545	9.74562	6.58545	6.58545	chr10	75257867	75263370	+	10_74726115_74720613_-5502|19.76|4|4	youxintian_mouse28026	NM_153406	Specc1l	exonic	506
chr10:75257868-75267589+	0	0	0	0	0	0	0	0	0	6.58545	6.58545	6.58545	6.58545	6.58545	6.58545	6.58545	6.58545	6.58545	chr10	75257867	75267589	+	10_74730334_74720613_-9721|17.03|14|32	youxintian_mouse28026	NM_153406	Specc1l	exonic	597
chr10:75274017-75279961+	0	3	0	1	2	10	1	0	0	6.58545	10.0798	6.58545	9.07415	9.84625	11.7992	8.8986	6.58545	6.58545	chr10	75274016	75279961	+	mm9_circ_003232	circBase	NM_153406	Specc1l	exonic	344
chr10:75915064-75916911-	0	0	0	0	0	0	0	0	0	6.58545	6.58545	6.58545	6.58545	6.58545	6.58545	6.58545	6.58545	6.58545	chr10	75915063	75916911	-	10_75379656_75377809_-1847|15.38|6|8	youxintian_mouse28026	NM_011418	Smarcb1	exonic	269
chr10:76317867-76319586-	0	0	0	0	0	3	0	0	0	6.58545	6.58545	6.58545	6.58545	6.58545	10.1502	6.58545	6.58545	6.58545	chr10	76317866	76319586	-		novel	NM_001081419	Dip2a	exonic	348
chr10:76367308-76370079-	0	0	0	0	2	0	1	0	0	6.58545	6.58545	6.58545	6.58545	9.84625	6.58545	8.8986	6.58545	6.58545	chr10	76367307	76370079	-	10_75832824_75830053_-2771|11.41|6|7	youxintian_mouse28026	NM_008787	Pcnt	exonic	522
chr10:77630726-77630894+	0	3	2	0	0	1	2	8	1	6.58545	10.0798	10.3404	6.58545	6.58545	8.79054	9.74562	11.6052	8.94889	chr10	77630725	77630894	+		novel	NM_019803	Ube2g2	exonic	82
chr10:79806640-79816923+	0	0	0	0	0	2	0	0	0	6.58545	6.58545	6.58545	6.58545	6.58545	9.62495	6.58545	6.58545	6.58545	chr10	79806639	79816923	+		novel	NM_023128	Palm	exonic	626
chr10:79826332-79826510+	0	0	0	2	0	0	0	0	0	6.58545	6.58545	6.58545	9.93954	6.58545	6.58545	6.58545	6.58545	6.58545	chr10	79826331	79826510	+		novel	NM_030218	Misp	sense overlapping	179
chr10:79930635-79932078+	0	0	0	1	0	0	2	0	0	6.58545	6.58545	6.58545	9.07415	6.58545	6.58545	9.74562	6.58545	6.58545	chr10	79930634	79932078	+	10_79394823_79393380_-1443|20.93|2|2	youxintian_mouse28026	NM_007880	Arid3a	exonic	967
chr10:80712112-80715179-	0	0	0	1	0	3	2	2	6	6.58545	6.58545	6.58545	9.07415	6.58545	10.1502	9.74562	9.73278	11.279	chr10	80712111	80715179	-	mm9_circ_011925	circBase	NM_007460	Ap3d1	exonic	744
chr10:80712112-80719812-	2	0	0	0	0	2	1	2	2	9.98053	6.58545	6.58545	6.58545	6.58545	9.62495	8.8986	9.73278	9.80143	chr10	80712111	80719812	-	10_80182557_80174857_-7700|11.74|4|4	youxintian_mouse28026	NM_007460	Ap3d1	exonic	1790
chr10:81241995-81249796+	0	0	0	0	0	0	0	0	0	6.58545	6.58545	6.58545	6.58545	6.58545	6.58545	6.58545	6.58545	6.58545	chr10	81241994	81249796	+	mm9_circ_000424	circBase	NM_001034895	Zfr2	exonic	1690
chr10:81264333-81265877-	0	0	0	0	4	0	0	0	0	6.58545	6.58545	6.58545	6.58545	10.769	6.58545	6.58545	6.58545	6.58545	chr10	81264332	81265877	-		novel	NM_025317	Mrpl54	sense overlapping	1545
chr10:81323619-81323781+	0	0	0	0	0	0	0	0	0	6.58545	6.58545	6.58545	6.58545	6.58545	6.58545	6.58545	6.58545	6.58545	chr10	81323618	81323781	+		novel	NM_027381	Cactin	exonic	163
chr10:81400509-81420798-	0	0	0	0	0	0	0	0	0	6.58545	6.58545	6.58545	6.58545	6.58545	6.58545	6.58545	6.58545	6.58545	chr10	81400508	81420798	-		novel	NM_008688	Nfic	sense overlapping	20290
chr10:81532396-81533406-	0	0	0	0	0	0	0	0	0	6.58545	6.58545	6.58545	6.58545	6.58545	6.58545	6.58545	6.58545	6.58545	chr10	81532395	81533406	-	10_80996151_80995141_-1010|16.59|7|17	youxintian_mouse28026	NM_010301	Gna11	exonic	284
chr10:82638701-82642090+	0	0	0	2	0	0	0	0	0	6.58545	6.58545	6.58545	9.93954	6.58545	6.58545	6.58545	6.58545	6.58545	chr10	82638700	82642090	+		novel	NM_011561	Tdg	exonic	488
chr10:83558598-83564537+	0	0	0	0	0	0	0	0	0	6.58545	6.58545	6.58545	6.58545	6.58545	6.58545	6.58545	6.58545	6.58545	chr10	83558597	83564537	+	10_83027282_83021343_-5939|15.49|10|21	youxintian_mouse28026	NM_001033375	A230046K03Rik	exonic	540
chr10:84947412-84948020+	0	2	0	0	0	0	0	1	0	6.58545	9.5575	6.58545	6.58545	6.58545	6.58545	6.58545	8.88706	6.58545	chr10	84947411	84948020	+	mm9_circ_004072	circBase	NM_183172	Ric8b	exonic	609
chr10:88735898-88737202+	0	0	0	0	2	0	0	0	0	6.58545	6.58545	6.58545	6.58545	9.84625	6.58545	6.58545	6.58545	6.58545	chr10	88735897	88737202	+		novel	NM_025859	Arl1	exonic	194
chr10:88809082-88810085-	2	3	2	0	0	1	0	1	0	9.98053	10.0798	10.3404	6.58545	6.58545	8.79054	6.58545	8.88706	6.58545	chr10	88809081	88810085	-	10_88272830_88271827_-1003|19.49|15|47	youxintian_mouse28026	NM_175158	Utp20	exonic	351
chr10:89473752-89483524-	8	5	4	1	6	4	2	4	1	11.8738	10.7647	11.2859	9.07415	11.3272	10.5344	9.74562	10.649	8.94889	chr10	89473751	89483524	-	10_88946269_88936497_-9772|22.02|4|24	youxintian_mouse28026	NM_009108	Nr1h4	exonic	624
chr10:89640654-89640830-	0	0	0	0	0	0	0	1	0	6.58545	6.58545	6.58545	6.58545	6.58545	6.58545	6.58545	8.88706	6.58545	chr10	89640653	89640830	-		novel	NM_198021	Scyl2	sense overlapping	177
chr10:89772587-89794624+	0	2	0	0	0	0	0	0	0	6.58545	9.5575	6.58545	6.58545	6.58545	6.58545	6.58545	6.58545	6.58545	chr10	89772586	89794624	+	10_89257369_89235332_-22037|15.86|11|19	youxintian_mouse28026	NM_029166	Uhrf1bp1l	exonic	1505
chr10:89779835-89782740+	0	0	0	0	2	0	0	0	0	6.58545	6.58545	6.58545	6.58545	9.84625	6.58545	6.58545	6.58545	6.58545	chr10	89779834	89782740	+	10_89245485_89242580_-2905|19.02|3|3	youxintian_mouse28026	NM_029166	Uhrf1bp1l	exonic	502
chr10:91009124-91023848-	0	0	0	0	0	0	2	0	0	6.58545	6.58545	6.58545	6.58545	6.58545	6.58545	9.74562	6.58545	6.58545	chr10	91009123	91023848	-		novel	NM_009684	Apaf1	exonic	618
chr10:92711171-92719629-	0	0	0	3	0	0	0	0	0	6.58545	6.58545	6.58545	10.4767	6.58545	6.58545	6.58545	6.58545	6.58545	chr10	92711170	92719629	-		novel	NM_008682	Nedd1	exonic	497
chr10:93222505-93223444+	0	0	0	0	0	0	0	0	0	6.58545	6.58545	6.58545	6.58545	6.58545	6.58545	6.58545	6.58545	6.58545	chr10	93222504	93223444	+		novel	ENSMUST00000069965	Cdk17	intronic	940
chr10:93235438-93236963+	0	0	0	0	0	1	0	1	4	6.58545	6.58545	6.58545	6.58545	6.58545	8.79054	6.58545	8.88706	10.7216	chr10	93235437	93236963	+	10_92699708_92698183_-1525|14.60|19|46	youxintian_mouse28026	NM_146239	Cdk17	exonic	247
chr10:93862377-93868961-	0	0	0	0	0	0	0	0	0	6.58545	6.58545	6.58545	6.58545	6.58545	6.58545	6.58545	6.58545	6.58545	chr10	93862376	93868961	-	10_93331706_93325122_-6584|20.36|4|4	youxintian_mouse28026	NM_019648	Metap2	exonic	412
chr10:94043302-94045633+	0	2	3	1	2	1	1	4	0	6.58545	9.5575	10.8892	9.07415	9.84625	8.79054	8.8986	10.649	6.58545	chr10	94043301	94045633	+	10_93508378_93506047_-2331|19.86|3|3	youxintian_mouse28026	NM_053072	Fgd6	exonic	2332
chr10:94089577-94089762+	0	2	0	0	0	0	0	0	0	6.58545	9.5575	6.58545	6.58545	6.58545	6.58545	6.58545	6.58545	6.58545	chr10	94089576	94089762	+	mm9_circ_001872	circBase	NM_053072	Fgd6	exonic	99
chr10:94089577-94103398+	0	0	0	0	2	0	0	0	0	6.58545	6.58545	6.58545	6.58545	9.84625	6.58545	6.58545	6.58545	6.58545	chr10	94089576	94103398	+		novel	NM_053072	Fgd6	exonic	408
chr10:94578423-94582409+	1	0	0	0	0	2	0	0	0	9.11153	6.58545	6.58545	6.58545	6.58545	9.62495	6.58545	6.58545	6.58545	chr10	94578422	94582409	+	10_94045154_94041168_-3986|21.26|2|2	youxintian_mouse28026	NM_172051	Tmcc3	exonic	1053
chr10:94748941-94750659+	0	0	0	0	0	1	0	1	0	6.58545	6.58545	6.58545	6.58545	6.58545	8.79054	6.58545	8.88706	6.58545	chr10	94748940	94750659	+	mm9_circ_004012	circBase	NM_029852	Cep83	exonic	410
chr10:95989562-95995690+	2	3	0	1	0	0	0	0	0	9.98053	10.0798	6.58545	9.07415	6.58545	6.58545	6.58545	6.58545	6.58545	chr10	95989561	95995690	+	10_95458324_95452196_-6128|14.40|6|8	youxintian_mouse28026	NM_001001932	Eea1	exonic	525
chr10:96002887-96013425+	0	1	1	0	2	0	1	0	0	6.58545	8.73056	9.44345	6.58545	9.84625	6.58545	8.8986	6.58545	6.58545	chr10	96002886	96013425	+	10_95476059_95465521_-10538|19.98|1|2	youxintian_mouse28026	NM_001001932	Eea1	exonic	726
chr10:99124831-99129662+	0	2	0	0	1	1	0	0	2	6.58545	9.5575	6.58545	6.58545	8.98942	8.79054	6.58545	6.58545	9.80143	chr10	99124830	99129662	+	10_98592296_98587465_-4831|21.09|7|8	youxintian_mouse28026	NM_027740	Poc1b	exonic	352
chr10:100536806-100539090+	0	0	0	0	0	0	3	0	0	6.58545	6.58545	6.58545	6.58545	6.58545	6.58545	10.2758	6.58545	6.58545	chr10	100536805	100539090	+		novel	NM_146009	Cep290	exonic	733
chr10:100565567-100565758+	0	0	0	0	0	0	0	0	2	6.58545	6.58545	6.58545	6.58545	6.58545	6.58545	6.58545	6.58545	9.80143	chr10	100565566	100565758	+		novel	ENSMUST00000164751	Cep290	intronic	192
chr10:105303594-105323637-	3	2	0	0	0	1	2	0	0	10.519	9.5575	6.58545	6.58545	6.58545	8.79054	9.74562	6.58545	6.58545	chr10	105303593	105323637	-	10_104760693_104740650_-20043|16.26|10|21	youxintian_mouse28026	NM_177368	Tmtc2	exonic	472
chr10:105303594-105348549-	0	0	0	0	0	0	0	0	2	6.58545	6.58545	6.58545	6.58545	6.58545	6.58545	6.58545	6.58545	9.80143	chr10	105303593	105348549	-	10_104785605_104740650_-44955|11.78|2|4	youxintian_mouse28026	NM_177368	Tmtc2	exonic	587
chr10:105413217-105413787-	1	4	0	1	1	1	1	2	4	9.11153	10.4625	6.58545	9.07415	8.98942	8.79054	8.8986	9.73278	10.7216	chr10	105413216	105413787	-	10_104850843_104850273_-570|17.43|13|22	youxintian_mouse28026	NM_177368	Tmtc2	exonic	571
chr10:108198833-108234143+	0	2	0	0	1	0	0	0	0	6.58545	9.5575	6.58545	6.58545	8.98942	6.58545	6.58545	6.58545	6.58545	chr10	108198832	108234143	+	10_107671199_107635889_-35310|14.79|2|2	youxintian_mouse28026	NM_027892	Ppp1r12a	exonic	555
chr10:108240105-108253495+	1	0	0	0	0	0	0	1	0	9.11153	6.58545	6.58545	6.58545	6.58545	6.58545	6.58545	8.88706	6.58545	chr10	108240104	108253495	+	10_107690551_107677161_-13390|17.11|12|25	youxintian_mouse28026	NM_027892	Ppp1r12a	exonic	1202
chr10:108268572-108274188+	4	2	0	0	2	0	0	1	1	10.9103	9.5575	6.58545	6.58545	9.84625	6.58545	6.58545	8.88706	8.94889	chr10	108268571	108274188	+	10_107711244_107705628_-5616|15.42|15|32	youxintian_mouse28026	NM_027892	Ppp1r12a	exonic	371
chr10:115386962-115390436+	2	5	2	0	0	0	3	5	1	9.98053	10.7647	10.3404	6.58545	6.58545	6.58545	10.2758	10.9535	8.94889	chr10	96128942	96134132	-		youxintian_mouse28026	NM_144910	Cnot6l	exonic	395
chr10:115406353-115406898+	1	4	1	0	1	0	0	0	0	9.11153	10.4625	9.44345	6.58545	8.98942	6.58545	6.58545	6.58545	6.58545	chr10	115406352	115406898	+		novel	NM_001033261	Zfc3h1	exonic	375
chr10:116517317-116549175-	0	2	2	0	1	3	2	2	4	6.58545	9.5575	10.3404	6.58545	8.98942	10.1502	9.74562	9.73278	10.7216	chr10	116517316	116549175	-	mm9_circ_011356	circBase	NM_028082	Cnot2	exonic	210
chr10:116537221-116549105-	0	2	0	0	0	0	0	0	0	6.58545	9.5575	6.58545	6.58545	6.58545	6.58545	6.58545	6.58545	6.58545	chr10	116537220	116549105	-		novel	uc007hce.2	Cnot2	exonic	301
chr10:116910125-116928284-	0	0	0	0	0	0	0	0	0	6.58545	6.58545	6.58545	6.58545	6.58545	6.58545	6.58545	6.58545	6.58545	chr10	116910124	116928284	-	10_116365340_116347181_-18159|16.29|2|2	youxintian_mouse28026	uc007hck.1	Rab3ip	exonic	790
chr10:116928189-116939481-	0	0	2	0	0	0	0	0	0	6.58545	6.58545	10.3404	6.58545	6.58545	6.58545	6.58545	6.58545	6.58545	chr10	116928188	116939481	-	10_116376537_116365245_-11292|14.03|5|7	youxintian_mouse28026	uc007hck.1	Rab3ip	exonic	636
chr10:116937397-116939481-	1	1	1	1	0	2	2	2	0	9.11153	8.73056	9.44345	9.07415	6.58545	9.62495	9.74562	9.73278	6.58545	chr10	116937396	116939481	-	10_116376537_116374453_-2084|16.88|10|16	youxintian_mouse28026	NM_001003950	Rab3ip	exonic	540
chr10:117099943-117102198-	1	0	0	0	3	4	0	0	0	9.11153	6.58545	6.58545	6.58545	10.3801	10.5344	6.58545	6.58545	6.58545	chr10	117099942	117102198	-	10_116539254_116536999_-2255|17.65|12|36	youxintian_mouse28026	NM_177798	Frs2	exonic	154
chr10:117355935-117367988-	0	0	1	0	0	0	1	0	0	6.58545	6.58545	9.44345	6.58545	6.58545	6.58545	8.8986	6.58545	6.58545	chr10	117355934	117367988	-	mm9_circ_008959	circBase	NM_001013391	Cpsf6	exonic	1599
chr10:117777129-117777664-	0	0	0	2	0	0	0	0	0	6.58545	6.58545	6.58545	9.93954	6.58545	6.58545	6.58545	6.58545	6.58545	chr10	117777128	117777664	-	10_117214720_117214185_-535|20.32|11|19	youxintian_mouse28026	NM_134010	Nup107	exonic	161
chr10:117820462-117822869-	0	0	0	0	0	0	2	0	0	6.58545	6.58545	6.58545	6.58545	6.58545	6.58545	9.74562	6.58545	6.58545	chr10	117820461	117822869	-	10_117259925_117257518_-2407|13.36|8|8	youxintian_mouse28026	NM_024457	Rap1b	exonic	267
chr10:119897715-119945171+	0	0	0	0	0	2	0	0	0	6.58545	6.58545	6.58545	6.58545	6.58545	9.62495	6.58545	6.58545	6.58545	chr10	119897714	119945171	+	10_119382227_119334771_-47456|18.98|8|13	youxintian_mouse28026	NM_028736	Grip1	exonic	669
chr10:120176231-120182708-	0	0	0	0	0	0	0	1	0	6.58545	6.58545	6.58545	6.58545	6.58545	6.58545	6.58545	8.88706	6.58545	chr10	120176230	120182708	-	10_119619764_119613287_-6477|18.54|2|2	youxintian_mouse28026	NM_028679	Irak3	exonic	494
chr10:120825108-120852092-	0	0	0	0	1	3	0	2	0	6.58545	6.58545	6.58545	6.58545	8.98942	10.1502	6.58545	9.73278	6.58545	chr10	120825107	120852092	-	10_120289148_120262164_-26984|20.39|18|108	youxintian_mouse28026	NM_177092	Msrb3	exonic	216
chr10:120947204-120952255-	0	0	0	0	0	1	0	0	0	6.58545	6.58545	6.58545	6.58545	6.58545	8.79054	6.58545	6.58545	6.58545	chr10	120947203	120952255	-	mm9_circ_007806	circBase	NM_001081193	Lemd3	exonic	173
chr10:121925816-121931509-	0	2	0	0	2	0	1	7	3	6.58545	9.5575	6.58545	6.58545	9.84625	6.58545	8.8986	11.4189	10.3337	chr10	121925815	121931509	-	mm9_circ_014642	circBase	NM_001081037	Srgap1	exonic	359
chr10:122904092-122920845+	0	0	0	0	0	1	0	0	2	6.58545	6.58545	6.58545	6.58545	6.58545	8.79054	6.58545	6.58545	9.80143	chr10	122904091	122920845	+	10_122357901_122341148_-16753|18.33|11|44	youxintian_mouse28026	NM_001110218	Ppm1h	exonic	324
chr10:123130941-123146938-	0	0	0	0	0	0	0	0	0	6.58545	6.58545	6.58545	6.58545	6.58545	6.58545	6.58545	6.58545	6.58545	chr10	123130940	123146938	-		novel	NM_027604	Usp15	exonic	703
chr10:123132956-123146938-	0	2	0	0	0	0	0	0	0	6.58545	9.5575	6.58545	6.58545	6.58545	6.58545	6.58545	6.58545	6.58545	chr10	123132955	123146938	-		novel	NM_027604	Usp15	exonic	319
chr10:123426530-123426745+	0	0	0	0	0	0	0	0	0	6.58545	6.58545	6.58545	6.58545	6.58545	6.58545	6.58545	6.58545	6.58545	chr10	123426529	123426745	+		novel	NM_001252387	Fam19a2	intronic	216
chr10:125294595-125302081-	0	3	0	0	0	1	0	0	0	6.58545	10.0798	6.58545	6.58545	6.58545	8.79054	6.58545	6.58545	6.58545	chr10	125294594	125302081	-	10_124739137_124731651_-7486|20.58|15|51	youxintian_mouse28026	NM_011391	Slc16a7	exonic	456
chr10:125972121-125972467+	0	0	1	1	2	2	0	0	0	6.58545	6.58545	9.44345	9.07415	9.84625	9.62495	6.58545	6.58545	6.58545	chr10	125972120	125972467	+		novel	NM_177152	Lrig3	exonic	147
chr10:127484506-127485022+	0	0	0	0	0	2	0	0	0	6.58545	6.58545	6.58545	6.58545	6.58545	9.62495	6.58545	6.58545	6.58545	chr10	127484505	127485022	+		novel	NM_027900	R3hdm2	exonic	288
chr10:127646891-127648189+	0	2	0	0	0	0	0	0	0	6.58545	9.5575	6.58545	6.58545	6.58545	6.58545	6.58545	6.58545	6.58545	chr10	127646890	127648189	+		novel	NM_009284	Stat6	exonic	360
chr10:127705466-127706858+	0	0	0	0	0	2	0	0	0	6.58545	6.58545	6.58545	6.58545	6.58545	9.62495	6.58545	6.58545	6.58545	chr10	127705465	127706858	+		novel	NM_001081219	Myo1a	sense overlapping	1393
chr10:128115025-128116757+	0	1	0	0	0	0	0	0	0	6.58545	8.73056	6.58545	6.58545	6.58545	6.58545	6.58545	6.58545	6.58545	chr10	128115024	128116757	+		novel	NM_054078	Baz2a	exonic	483
chr10:128579496-128582103-	0	0	0	2	0	0	0	0	1	6.58545	6.58545	6.58545	9.93954	6.58545	6.58545	6.58545	6.58545	8.94889	chr10	128579495	128582103	-		novel	NM_010153	Erbb3	exonic	309
chr10:128872421-128885658+	0	0	0	0	0	2	0	0	0	6.58545	6.58545	6.58545	6.58545	6.58545	9.62495	6.58545	6.58545	6.58545	chr10	128872420	128885658	+		novel	NM_025364	Sarnp	sense overlapping	13238
chr10:128940682-128940937+	0	0	0	0	0	0	0	0	0	6.58545	6.58545	6.58545	6.58545	6.58545	6.58545	6.58545	6.58545	6.58545	chr10	128940681	128940937	+		novel	NM_008398	Itga7	exonic	256
chr11:3262489-3264890-	0	0	0	2	0	0	0	0	0	6.58545	6.58545	6.58545	9.93954	6.58545	6.58545	6.58545	6.58545	6.58545	chr11	3262488	3264890	-		novel	NM_007879	Drg1	exonic	300
chr11:3517756-3520916-	0	3	0	0	6	0	0	0	1	6.58545	10.0798	6.58545	6.58545	11.3272	6.58545	6.58545	6.58545	8.94889	chr11	3517755	3520916	-	11_3420919_3417759_-3160|18.01|2|4	youxintian_mouse28026	NM_013870	Smtn	sense overlapping	3161
chr11:3521817-3524726-	0	0	0	0	0	0	0	0	0	6.58545	6.58545	6.58545	6.58545	6.58545	6.58545	6.58545	6.58545	6.58545	chr11	3521816	3524726	-		novel	NM_013870	Smtn	exonic	538
chr11:4498888-4504145-	0	0	0	0	0	0	0	0	0	6.58545	6.58545	6.58545	6.58545	6.58545	6.58545	6.58545	6.58545	6.58545	chr11	4498887	4504145	-		novel	NM_028860	Mtmr3	exonic	320
chr11:4517741-4531305-	1	0	0	1	1	1	0	1	0	9.11153	6.58545	6.58545	9.07415	8.98942	8.79054	6.58545	8.88706	6.58545	chr11	4517740	4531305	-	11_4431308_4417744_-13564|15.86|22|126	youxintian_mouse28026	NM_028860	Mtmr3	exonic	541
chr11:4517741-4546268-	0	0	0	0	0	1	0	0	1	6.58545	6.58545	6.58545	6.58545	6.58545	8.79054	6.58545	6.58545	8.94889	chr11	4517740	4546268	-	11_4446271_4417744_-28527|17.65|12|14	youxintian_mouse28026	ENSMUST00000040448	Mtmr3	exonic	621
chr11:4517741-4549356-	3	0	0	0	0	0	0	0	0	10.519	6.58545	6.58545	6.58545	6.58545	6.58545	6.58545	6.58545	6.58545	chr11	4517740	4549356	-	11_4449359_4417744_-31615|21.39|3|4	youxintian_mouse28026	NM_028860	Mtmr3	sense overlapping	31616
chr11:4520832-4531305-	0	0	0	0	0	0	0	0	0	6.58545	6.58545	6.58545	6.58545	6.58545	6.58545	6.58545	6.58545	6.58545	chr11	4520831	4531305	-		novel	NM_028860	Mtmr3	exonic	374
chr11:4527836-4531305-	0	0	0	0	0	0	0	0	0	6.58545	6.58545	6.58545	6.58545	6.58545	6.58545	6.58545	6.58545	6.58545	chr11	4527835	4531305	-	11_4431308_4427839_-3469|14.60|13|32	youxintian_mouse28026	NM_028860	Mtmr3	exonic	291
chr11:4527836-4546268-	0	1	0	0	0	0	1	0	0	6.58545	8.73056	6.58545	6.58545	6.58545	6.58545	8.8986	6.58545	6.58545	chr11	4527835	4546268	-	11_4446271_4427839_-18432|16.39|5|6	youxintian_mouse28026	ENSMUST00000040448	Mtmr3	exonic	371
chr11:4646562-4656336+	0	0	0	0	0	0	0	0	0	6.58545	6.58545	6.58545	6.58545	6.58545	6.58545	6.58545	6.58545	6.58545	chr11	4646561	4656336	+	11_4556339_4546565_-9774|13.56|3|3	youxintian_mouse28026	NM_029291	Ascc2	exonic	528
chr11:4656269-4659384+	0	0	0	0	0	0	0	1	0	6.58545	6.58545	6.58545	6.58545	6.58545	6.58545	6.58545	8.88706	6.58545	chr11	4656268	4659384	+	11_4559387_4556272_-3115|21.89|2|2	youxintian_mouse28026	NM_029291	Ascc2	exonic	292
chr11:4768078-4784563-	0	0	0	0	0	0	2	0	0	6.58545	6.58545	6.58545	6.58545	6.58545	6.58545	9.74562	6.58545	6.58545	chr11	4768077	4784563	-		novel	NM_010898	Nf2	sense overlapping	16486
chr11:4803678-4820493-	1	0	0	0	0	0	0	0	0	9.11153	6.58545	6.58545	6.58545	6.58545	6.58545	6.58545	6.58545	6.58545	chr11	4803677	4820493	-	11_4720496_4703681_-16815|15.86|22|88	youxintian_mouse28026	NM_010898	Nf2	exonic	561
chr11:4808257-4820493-	3	0	0	0	0	1	0	1	0	10.519	6.58545	6.58545	6.58545	6.58545	8.79054	6.58545	8.88706	6.58545	chr11	4808256	4820493	-	11_4720496_4708260_-12236|17.16|11|18	youxintian_mouse28026	NM_010898	Nf2	exonic	402
chr11:5791792-5800676+	0	0	0	2	0	0	0	0	0	6.58545	6.58545	6.58545	9.93954	6.58545	6.58545	6.58545	6.58545	6.58545	chr11	5791791	5800676	+		novel	NM_013810	Dbnl	sense overlapping	8885
chr11:6193154-6193476-	0	2	1	0	2	0	1	5	2	6.58545	9.5575	9.44345	6.58545	9.84625	6.58545	8.8986	10.9535	9.80143	chr11	6193153	6193476	-	mm9_circ_005786	circBase	NM_173748	Nudcd3	exonic	323
chr11:6313788-6317080+	2	7	3	3	2	7	6	0	3	9.98053	11.2272	10.8892	10.4767	9.84625	11.3012	11.2188	6.58545	10.3337	chr11	6313787	6317080	+	mm9_circ_001335	circBase	NM_010956	Ogdh	exonic	295
chr11:8434024-8453250-	0	0	0	0	0	2	0	0	0	6.58545	6.58545	6.58545	6.58545	6.58545	9.62495	6.58545	6.58545	6.58545	chr11	8434023	8453250	-		novel	NM_001083587	Tns3	sense overlapping	19227
chr11:8478225-8479665-	0	0	0	1	2	5	0	1	0	6.58545	6.58545	6.58545	9.07415	9.84625	10.8376	6.58545	8.88706	6.58545	chr11	8478224	8479665	-	mm9_circ_005801	circBase	NM_001083587	Tns3	exonic	360
chr11:8478225-8493337-	0	0	0	0	0	0	0	0	0	6.58545	6.58545	6.58545	6.58545	6.58545	6.58545	6.58545	6.58545	6.58545	chr11	8478224	8493337	-		novel	NM_001083587	Tns3	exonic	1605
chr11:8518199-8519570-	1	2	0	0	2	1	0	2	0	9.11153	9.5575	6.58545	6.58545	9.84625	8.79054	6.58545	9.73278	6.58545	chr11	8518198	8519570	-	mm9_circ_000787	circBase	NM_001083587	Tns3	exonic	301
chr11:8518199-8532509-	0	2	0	0	0	1	0	1	0	6.58545	9.5575	6.58545	6.58545	6.58545	8.79054	6.58545	8.88706	6.58545	chr11	8518198	8532509	-		novel	NM_001083587	Tns3	exonic	551
chr11:11700205-11707904+	0	1	1	0	1	1	2	0	1	6.58545	8.73056	9.44345	6.58545	8.98942	8.79054	9.74562	6.58545	8.94889	chr11	11700204	11707904	+	11_11607907_11600208_-7699|22.81|12|29	youxintian_mouse28026	NM_009578	Ikzf1	exonic	174
chr11:11951503-11967685-	0	0	0	0	2	0	0	0	0	6.58545	6.58545	6.58545	6.58545	9.84625	6.58545	6.58545	6.58545	6.58545	chr11	11951502	11967685	-		novel	NM_010345	Grb10	exonic	476
chr11:12343744-12378359-	0	0	0	0	0	0	0	0	3	6.58545	6.58545	6.58545	6.58545	6.58545	6.58545	6.58545	6.58545	10.3337	chr11	12343743	12378359	-	mm9_circ_018049	circBase	NM_172496	Cobl	exonic	787
chr11:12365105-12378359-	0	0	0	2	0	0	0	0	0	6.58545	6.58545	6.58545	9.93954	6.58545	6.58545	6.58545	6.58545	6.58545	chr11	12365104	12378359	-	11_12278362_12265108_-13254|19.59|3|9	youxintian_mouse28026	NM_172496	Cobl	exonic	613
chr11:12369594-12378359-	2	0	0	0	0	0	0	0	0	9.98053	6.58545	6.58545	6.58545	6.58545	6.58545	6.58545	6.58545	6.58545	chr11	12369593	12378359	-	11_12278362_12269597_-8765|21.05|5|8	youxintian_mouse28026	NM_172496	Cobl	exonic	538
chr11:16881464-16883613+	0	0	0	0	1	0	0	0	0	6.58545	6.58545	6.58545	6.58545	8.98942	6.58545	6.58545	6.58545	6.58545	chr11	16881463	16883613	+	11_16783616_16781467_-2149|21.38|4|9	youxintian_mouse28026	NM_007912	Egfr	exonic	249
chr11:17192957-17194853+	0	0	0	0	0	0	0	2	0	6.58545	6.58545	6.58545	6.58545	6.58545	6.58545	6.58545	9.73278	6.58545	chr11	17192956	17194853	+		novel	NM_024459	Ppp3r1	exonic	422
chr11:18941659-19011388-	0	2	0	0	0	0	0	0	0	6.58545	9.5575	6.58545	6.58545	6.58545	6.58545	6.58545	6.58545	6.58545	chr11	18941658	19011388	-		novel	NM_010789	Meis1	exonic	405
chr11:19998120-20008477+	0	1	0	1	0	2	0	1	0	6.58545	8.73056	6.58545	9.07415	6.58545	9.62495	6.58545	8.88706	6.58545	chr11	19998119	20008477	+	mm9_circ_005654	circBase	NM_033523	Spred2	exonic	412
chr11:20072456-20080798-	0	0	0	0	0	0	0	0	0	6.58545	6.58545	6.58545	6.58545	6.58545	6.58545	6.58545	6.58545	6.58545	chr11	20072455	20080798	-	11_19980801_19972459_-8342|19.46|9|13	youxintian_mouse28026	NM_146243	Actr2	exonic	566
chr11:20072456-20091367-	0	0	0	0	2	0	0	0	0	6.58545	6.58545	6.58545	6.58545	9.84625	6.58545	6.58545	6.58545	6.58545	chr11	20072455	20091367	-		novel	NM_146243	Actr2	exonic	639
chr11:20692465-20708737-	0	0	2	0	1	1	0	0	0	6.58545	6.58545	10.3404	6.58545	8.98942	8.79054	6.58545	6.58545	6.58545	chr11	20692464	20708737	-	11_20608740_20592468_-16272|12.89|3|3	youxintian_mouse28026	NM_181411	Aftph	exonic	365
chr11:20692465-20727639-	0	0	0	0	0	0	0	0	0	6.58545	6.58545	6.58545	6.58545	6.58545	6.58545	6.58545	6.58545	6.58545	chr11	20692464	20727639	-	11_20627642_20592468_-35174|17.31|1|2	youxintian_mouse28026	NM_181411	Aftph	exonic	2599
chr11:20703711-20727639-	0	3	0	0	0	0	0	0	0	6.58545	10.0798	6.58545	6.58545	6.58545	6.58545	6.58545	6.58545	6.58545	chr11	20703710	20727639	-	mm9_circ_016520	circBase	NM_181411	Aftph	exonic	2414
chr11:20725685-20727639-	3	2	3	0	3	1	1	0	0	10.519	9.5575	10.8892	6.58545	10.3801	8.79054	8.8986	6.58545	6.58545	chr11	20725684	20727639	-	mm9_circ_005474	circBase	NM_181411	Aftph	exonic	1955
chr11:21136046-21148425+	0	0	0	0	3	0	0	0	2	6.58545	6.58545	6.58545	6.58545	10.3801	6.58545	6.58545	6.58545	9.80143	chr11	21136045	21148425	+	11_21048428_21036049_-12379|18.26|7|12	youxintian_mouse28026	NM_023324	Peli1	sense overlapping	12380
chr11:22956153-22958186-	0	0	0	0	0	0	0	0	1	6.58545	6.58545	6.58545	6.58545	6.58545	6.58545	6.58545	6.58545	8.94889	chr11	22956152	22958186	-		novel	ENSMUST00000071068	Commd1	intronic	2034
chr11:22956411-22958186-	1	0	0	0	0	2	0	0	0	9.11153	6.58545	6.58545	6.58545	6.58545	9.62495	6.58545	6.58545	6.58545	chr11	22956410	22958186	-	11_22858186_22856411_-1775|13.06|3|3	youxintian_mouse28026	ENSMUST00000071068	Commd1	intronic	1776
chr11:23333439-23377637+	0	0	0	0	0	0	0	0	2	6.58545	6.58545	6.58545	6.58545	6.58545	6.58545	6.58545	6.58545	9.80143	chr11	23333438	23377637	+		novel	NM_001190401	Usp34	exonic	2993
chr11:23343320-23355098+	0	2	0	1	0	0	0	0	0	6.58545	9.5575	6.58545	9.07415	6.58545	6.58545	6.58545	6.58545	6.58545	chr11	23343319	23355098	+	11_23255098_23243320_-11778|19.52|4|4	youxintian_mouse28026	NM_001190401	Usp34	exonic	699
chr11:23349151-23355098+	0	0	0	0	0	0	0	0	0	6.58545	6.58545	6.58545	6.58545	6.58545	6.58545	6.58545	6.58545	6.58545	chr11	23349150	23355098	+		novel	NM_001190401	Usp34	exonic	430
chr11:23351592-23355098+	0	0	0	5	0	1	0	1	0	6.58545	6.58545	6.58545	11.1742	6.58545	8.79054	6.58545	8.88706	6.58545	chr11	23351591	23355098	+	11_23255098_23251592_-3506|17.65|14|22	youxintian_mouse28026	NM_001190401	Usp34	exonic	237
chr11:23370239-23405953+	0	0	0	0	0	0	0	0	2	6.58545	6.58545	6.58545	6.58545	6.58545	6.58545	6.58545	6.58545	9.80143	chr11	23370238	23405953	+		novel	NM_001190401	Usp34	exonic	2048
chr11:23382554-23401578+	0	0	0	0	0	0	0	3	0	6.58545	6.58545	6.58545	6.58545	6.58545	6.58545	6.58545	10.2624	6.58545	chr11	23382553	23401578	+	11_23301578_23282554_-19024|15.03|5|6	youxintian_mouse28026	NM_001190401	Usp34	exonic	1086
chr11:23649270-23651055-	0	0	0	0	0	0	0	0	0	6.58545	6.58545	6.58545	6.58545	6.58545	6.58545	6.58545	6.58545	6.58545	chr11	23649269	23651055	-	11_23551055_23549270_-1785|12.39|8|10	youxintian_mouse28026	NM_023651	Pex13	sense overlapping	1786
chr11:23707523-23725574+	0	2	0	0	0	1	0	6	0	6.58545	9.5575	6.58545	6.58545	6.58545	8.79054	6.58545	11.2049	6.58545	chr11	23707522	23725574	+		novel	NM_028304	Pus10	exonic	774
chr11:26397746-26434500+	0	1	0	0	0	0	0	0	3	6.58545	8.73056	6.58545	6.58545	6.58545	6.58545	6.58545	6.58545	10.3337	chr11	26397745	26434500	+	mm9_circ_007924	circBase	NM_025923	Fancl	exonic	444
chr11:26534211-26550075-	1	1	0	0	0	1	0	0	0	9.11153	8.73056	6.58545	6.58545	6.58545	8.79054	6.58545	6.58545	6.58545	chr11	26534210	26550075	-	11_26450075_26434211_-15864|17.27|20|65	youxintian_mouse28026	NM_027260	Vrk2	exonic	407
chr11:29198793-29205704+	2	0	0	0	0	0	0	0	0	9.98053	6.58545	6.58545	6.58545	6.58545	6.58545	6.58545	6.58545	6.58545	chr11	29198792	29205704	+	11_29105704_29098793_-6911|15.14|4|4	youxintian_mouse28026	NM_134034	Smek2	exonic	436
chr11:29705535-29708770+	0	1	0	0	0	0	2	0	0	6.58545	8.73056	6.58545	6.58545	6.58545	6.58545	9.74562	6.58545	6.58545	chr11	29705534	29708770	+	mm9_circ_014561	circBase	NM_194051	Rtn4	exonic	2418
chr11:30219579-30219772-	0	0	0	0	0	2	0	0	0	6.58545	6.58545	6.58545	6.58545	6.58545	9.62495	6.58545	6.58545	6.58545	chr11	30219578	30219772	-	11_30119772_30119579_-193|21.53|14|21	youxintian_mouse28026	NM_175836	Sptbn1	exonic	194
chr11:30791092-30792038+	0	0	1	0	0	0	0	0	2	6.58545	6.58545	9.44345	6.58545	6.58545	6.58545	6.58545	6.58545	9.80143	chr11	30791091	30792038	+	11_30692038_30691092_-946|18.35|10|10	youxintian_mouse28026	NM_134013	Psme4	exonic	258
chr11:31055458-31061586+	1	0	0	0	1	0	2	2	0	9.11153	6.58545	6.58545	6.58545	8.98942	6.58545	9.74562	9.73278	6.58545	chr11	31055457	31061586	+	11_30961586_30955458_-6128|14.06|25|190	youxintian_mouse28026	NM_023906	Asb3	exonic	625
chr11:31055458-31064087+	0	3	0	0	0	0	1	0	0	6.58545	10.0798	6.58545	6.58545	6.58545	6.58545	8.8986	6.58545	6.58545	chr11	31055457	31064087	+	11_30964087_30955458_-8629|18.33|12|21	youxintian_mouse28026	NM_023906	Asb3	sense overlapping	8630
chr11:41498911-41499246+	0	0	0	0	0	0	2	0	0	6.58545	6.58545	6.58545	6.58545	6.58545	6.58545	9.74562	6.58545	6.58545	chr11	41498910	41499246	+		novel	ENSMUST00000073950	Gm12141	sense overlapping	336
chr11:43158347-43158500+	0	0	0	1	0	0	0	0	0	6.58545	6.58545	6.58545	9.07415	6.58545	6.58545	6.58545	6.58545	6.58545	chr11	43158346	43158500	+		novel	ENSMUST00000077659	Atp10b	intronic	154
chr11:43704534-43705477+	3	5	4	3	4	5	5	7	2	10.519	10.7647	11.2859	10.4767	10.769	10.8376	10.9673	11.4189	9.80143	chr11	43704533	43705477	+	mm9_circ_012559	circBase	NM_001164231	Pwwp2a	exonic	944
chr11:44524928-44555278+	0	2	0	0	0	0	0	0	0	6.58545	9.5575	6.58545	6.58545	6.58545	6.58545	6.58545	6.58545	6.58545	chr11	44524927	44555278	+		novel	NM_028862	Rnf145	exonic	970
chr11:44620414-44643469+	0	0	1	0	0	0	0	0	0	6.58545	6.58545	9.44345	6.58545	6.58545	6.58545	6.58545	6.58545	6.58545	chr11	44620413	44643469	+		novel	NM_007897	Ebf1	exonic	420
chr11:45883710-45895129+	0	0	0	0	1	0	0	0	0	6.58545	6.58545	6.58545	6.58545	8.98942	6.58545	6.58545	6.58545	6.58545	chr11	45883709	45895129	+	11_45708631_45697212_-11419|20.27|16|39	youxintian_mouse28026	NM_001045520	Clint1	exonic	971
chr11:46221336-46224205-	0	2	0	0	0	0	1	0	0	6.58545	9.5575	6.58545	6.58545	6.58545	6.58545	8.8986	6.58545	6.58545	chr11	46221335	46224205	-	11_46037707_46034838_-2869|16.05|9|12	youxintian_mouse28026	NM_133769	Cyfip2	exonic	366
chr11:49685087-49685352-	0	1	0	0	1	0	0	0	0	6.58545	8.73056	6.58545	6.58545	8.98942	6.58545	6.58545	6.58545	6.58545	chr11	49685086	49685352	-	11_49498854_49498589_-265|16.59|6|12	youxintian_mouse28026	NM_212484	Cnot6	exonic	159
chr11:50297058-50297313-	0	0	1	0	2	0	1	1	0	6.58545	6.58545	9.44345	6.58545	9.84625	6.58545	8.8986	8.88706	6.58545	chr11	50297057	50297313	-		novel	NM_007597	Canx	sense overlapping	256
chr11:50301758-50308929-	0	0	0	2	1	1	1	0	1	6.58545	6.58545	6.58545	9.93954	8.98942	8.79054	8.8986	6.58545	8.94889	chr11	50301757	50308929	-	11_50122431_50115260_-7171|20.09|17|68	youxintian_mouse28026	NM_007597	Canx	exonic	721
chr11:50301758-50310867-	0	0	1	0	0	0	2	1	0	6.58545	6.58545	9.44345	6.58545	6.58545	6.58545	9.74562	8.88706	6.58545	chr11	50301757	50310867	-	11_50124369_50115260_-9109|15.15|10|21	youxintian_mouse28026	NM_007597	Canx	exonic	854
chr11:50304326-50308929-	0	5	0	0	0	1	0	1	0	6.58545	10.7647	6.58545	6.58545	6.58545	8.79054	6.58545	8.88706	6.58545	chr11	50304325	50308929	-	11_50122431_50117828_-4603|16.88|19|45	youxintian_mouse28026	NM_007597	Canx	exonic	607
chr11:50307470-50308929-	3	2	0	0	0	1	1	0	0	10.519	9.5575	6.58545	6.58545	6.58545	8.79054	8.8986	6.58545	6.58545	chr11	50307469	50308929	-	11_50122431_50120972_-1459|15.99|22|63	youxintian_mouse28026	NM_007597	Canx	exonic	417
chr11:50307470-50310867-	1	1	0	0	0	0	0	0	0	9.11153	8.73056	6.58545	6.58545	6.58545	6.58545	6.58545	6.58545	6.58545	chr11	50307469	50310867	-	mm9_circ_015102	circBase	NM_007597	Canx	exonic	550
chr11:50379821-50382871+	0	0	0	0	0	0	0	0	0	6.58545	6.58545	6.58545	6.58545	6.58545	6.58545	6.58545	6.58545	6.58545	chr11	50379820	50382871	+		novel	NM_021510	Hnrnph1	exonic	534
chr11:51712189-51717779-	0	0	0	0	0	0	0	0	0	6.58545	6.58545	6.58545	6.58545	6.58545	6.58545	6.58545	6.58545	6.58545	chr11	51712188	51717779	-		novel	NM_175255	Sec24a	exonic	717
chr11:51716439-51729575-	0	0	0	0	0	0	0	2	0	6.58545	6.58545	6.58545	6.58545	6.58545	6.58545	6.58545	9.73278	6.58545	chr11	51716438	51729575	-	11_51543077_51529941_-13136|12.74|4|4	youxintian_mouse28026	NM_001290785	Sec24a	exonic	729
chr11:51721815-51731905-	0	0	0	0	0	0	0	0	0	6.58545	6.58545	6.58545	6.58545	6.58545	6.58545	6.58545	6.58545	6.58545	chr11	51721814	51731905	-	11_51545407_51535317_-10090|22.07|5|6	youxintian_mouse28026	NM_175255	Sec24a	exonic	572
chr11:51729452-51734661-	0	0	0	0	0	1	2	0	0	6.58545	6.58545	6.58545	6.58545	6.58545	8.79054	9.74562	6.58545	6.58545	chr11	51729451	51734661	-	11_51548163_51542954_-5209|15.33|16|56	youxintian_mouse28026	NM_175255	Sec24a	exonic	639
chr11:52117987-52119304+	1	2	0	0	0	0	2	2	0	9.11153	9.5575	6.58545	6.58545	6.58545	6.58545	9.74562	9.73278	6.58545	chr11	52117986	52119304	+	11_51932806_51931489_-1317|22.17|6|7	youxintian_mouse28026	NM_019411	Ppp2ca	exonic	426
chr11:53289024-53292314-	0	0	0	3	0	0	0	0	0	6.58545	6.58545	6.58545	10.4767	6.58545	6.58545	6.58545	6.58545	6.58545	chr11	53289023	53292314	-		novel	NM_008300	Hspa4	exonic	199
chr11:53368660-53380672+	0	2	0	1	1	0	0	1	0	6.58545	9.5575	6.58545	9.07415	8.98942	6.58545	6.58545	8.88706	6.58545	chr11	53368659	53380672	+	mm9_circ_010522	circBase	NM_033565	Aff4	exonic	1039
chr11:53399589-53402566+	0	0	1	0	2	1	0	2	0	6.58545	6.58545	9.44345	6.58545	9.84625	8.79054	6.58545	9.73278	6.58545	chr11	53399588	53402566	+	11_53216068_53213091_-2977|16.40|5|5	youxintian_mouse28026	NM_033565	Aff4	exonic	1007
chr11:54543579-54568496+	2	0	0	1	1	0	2	0	0	9.98053	6.58545	6.58545	9.07415	8.98942	6.58545	9.74562	6.58545	6.58545	chr11	54543578	54568496	+	11_54381998_54357081_-24917|21.09|21|242	youxintian_mouse28026	NM_175258	Rapgef6	exonic	426
chr11:57490110-57499805-	0	0	0	0	0	0	0	2	0	6.58545	6.58545	6.58545	6.58545	6.58545	6.58545	6.58545	9.73278	6.58545	chr11	57490109	57499805	-		novel	NM_026342	Fam114a2	exonic	416
chr11:57490110-57514288-	0	0	0	0	0	0	0	2	0	6.58545	6.58545	6.58545	6.58545	6.58545	6.58545	6.58545	9.73278	6.58545	chr11	57490109	57514288	-	11_57327790_57303612_-24178|13.38|2|3	youxintian_mouse28026	NM_001168667	Fam114a2	exonic	1310
chr11:58040391-58052731+	0	3	0	0	0	0	0	0	0	6.58545	10.0798	6.58545	6.58545	6.58545	6.58545	6.58545	6.58545	6.58545	chr11	58040390	58052731	+		novel	NM_028451	Larp1	exonic	2274
chr11:58111260-58115375+	0	0	0	0	0	0	0	2	0	6.58545	6.58545	6.58545	6.58545	6.58545	6.58545	6.58545	9.73278	6.58545	chr11	58111259	58115375	+	11_57928877_57924762_-4115|13.74|2|2	youxintian_mouse28026	NM_026949	Cnot8	exonic	612
chr11:58390210-58390442+	0	0	0	1	0	0	1	0	2	6.58545	6.58545	6.58545	9.07415	6.58545	6.58545	8.8986	6.58545	9.80143	chr11	58390209	58390442	+		novel	NM_027339	Lypd8	sense overlapping	233
chr11:58390246-58390426+	0	2	0	0	0	0	0	0	1	6.58545	9.5575	6.58545	6.58545	6.58545	6.58545	6.58545	6.58545	8.94889	chr11	58390245	58390426	+		novel	NM_027339	Lypd8	sense overlapping	181
chr11:58937140-58938413-	0	0	0	0	0	0	0	0	2	6.58545	6.58545	6.58545	6.58545	6.58545	6.58545	6.58545	6.58545	9.80143	chr11	58937139	58938413	-		novel	NM_022423	Rnf187	sense overlapping	1274
chr11:59741120-59742098+	0	0	0	0	0	0	0	0	0	6.58545	6.58545	6.58545	6.58545	6.58545	6.58545	6.58545	6.58545	6.58545	chr11	59741119	59742098	+		novel	NM_012027	Mprip	exonic	250
chr11:60270318-60275002-	1	2	0	0	0	0	0	0	1	9.11153	9.5575	6.58545	6.58545	6.58545	6.58545	6.58545	6.58545	8.94889	chr11	60270317	60275002	-	mm9_circ_003952	circBase	NM_153080	Tom1l2	exonic	229
chr11:60460787-60462634+	0	0	0	0	0	1	0	0	0	6.58545	6.58545	6.58545	6.58545	6.58545	8.79054	6.58545	6.58545	6.58545	chr11	60460786	60462634	+	11_60276136_60274289_-1847|21.12|6|7	youxintian_mouse28026	NM_021354	Drg2	exonic	430
chr11:61532518-61535383-	0	1	0	0	0	2	2	0	0	6.58545	8.73056	6.58545	6.58545	6.58545	9.62495	9.74562	6.58545	6.58545	chr11	61532517	61535383	-	11_61348885_61346020_-2865|13.96|15|33	youxintian_mouse28026	NM_010148	Epn2	exonic	435
chr11:61915024-61916266-	0	0	0	3	0	0	0	1	0	6.58545	6.58545	6.58545	10.4767	6.58545	6.58545	6.58545	8.88706	6.58545	chr11	61915023	61916266	-		novel	NM_019921	Akap10	exonic	741
chr11:62117700-62119282+	0	1	0	0	1	1	0	0	0	6.58545	8.73056	6.58545	6.58545	8.98942	8.79054	6.58545	6.58545	6.58545	chr11	62117699	62119282	+	11_61932784_61931202_-1582|21.89|10|16	youxintian_mouse28026	NM_001029936	Specc1	exonic	1583
chr11:62117700-62128407+	0	2	0	0	0	0	0	0	0	6.58545	9.5575	6.58545	6.58545	6.58545	6.58545	6.58545	6.58545	6.58545	chr11	62117699	62128407	+		novel	NM_001029936	Specc1	exonic	1791
chr11:62146306-62161910+	0	0	0	1	3	1	3	1	2	6.58545	6.58545	6.58545	9.07415	10.3801	8.79054	10.2758	8.88706	9.80143	chr11	62146305	62161910	+	mm9_circ_001346	circBase	NM_001029936	Specc1	exonic	586
chr11:62151870-62161910+	0	0	0	0	0	0	0	0	0	6.58545	6.58545	6.58545	6.58545	6.58545	6.58545	6.58545	6.58545	6.58545	chr11	62151869	62161910	+	11_61975412_61965372_-10040|15.73|13|49	youxintian_mouse28026	NM_001029936	Specc1	exonic	339
chr11:62340408-62345318-	0	0	0	0	0	0	2	0	0	6.58545	6.58545	6.58545	6.58545	6.58545	6.58545	9.74562	6.58545	6.58545	chr11	62340407	62345318	-	11_62158820_62153910_-4910|15.36|10|15	youxintian_mouse28026	NM_011308	Ncor1	exonic	918
chr11:62358855-62401267-	0	0	0	0	0	0	2	0	0	6.58545	6.58545	6.58545	6.58545	6.58545	6.58545	9.74562	6.58545	6.58545	chr11	62358854	62401267	-		novel	NM_011308	Ncor1	exonic	2221
chr11:62384718-62391033-	0	0	0	0	0	2	0	0	0	6.58545	6.58545	6.58545	6.58545	6.58545	9.62495	6.58545	6.58545	6.58545	chr11	62384717	62391033	-	11_62204535_62198220_-6315|13.77|8|15	youxintian_mouse28026	NM_011308	Ncor1	exonic	282
chr11:62419598-62438515-	0	0	0	0	0	0	0	0	0	6.58545	6.58545	6.58545	6.58545	6.58545	6.58545	6.58545	6.58545	6.58545	chr11	62419597	62438515	-	11_62252017_62233100_-18917|21.01|4|11	youxintian_mouse28026	NM_011308	Ncor1	exonic	691
chr11:62552578-62552805+	0	0	0	0	0	0	0	0	0	6.58545	6.58545	6.58545	6.58545	6.58545	6.58545	6.58545	6.58545	6.58545	chr11	62552577	62552805	+		novel	NR_002875	Gm1821	intronic	228
chr11:62833979-62840744+	0	0	0	0	0	0	2	2	0	6.58545	6.58545	6.58545	6.58545	6.58545	6.58545	9.74562	9.73278	6.58545	chr11	62833978	62840744	+		novel	uc007jkb.2	Trim16	exonic	849
chr11:65218529-65233184-	0	4	0	2	1	1	0	0	0	6.58545	10.4625	6.58545	9.93954	8.98942	8.79054	6.58545	6.58545	6.58545	chr11	65218528	65233184	-	11_65046686_65032031_-14655|12.11|5|15	youxintian_mouse28026	NM_145136	Myocd	exonic	360
chr11:65706984-65735366-	0	2	0	0	0	0	0	1	0	6.58545	9.5575	6.58545	6.58545	6.58545	6.58545	6.58545	8.88706	6.58545	chr11	65706983	65735366	-	11_65548868_65520486_-28382|14.38|7|10	youxintian_mouse28026	NM_009157	Map2k4	exonic	595
chr11:68011315-68020998+	0	0	0	0	0	0	1	3	0	6.58545	6.58545	6.58545	6.58545	6.58545	6.58545	8.8986	10.2624	6.58545	chr11	68011314	68020998	+	11_67834500_67824817_-9683|17.67|5|5	youxintian_mouse28026	NM_018768	Stx8	exonic	218
chr11:69649728-69651723+	2	1	1	0	1	1	1	2	4	9.98053	8.73056	9.44345	6.58545	8.98942	8.79054	8.8986	9.73278	10.7216	chr11	69649727	69651723	+	mm9_circ_005799	circBase	NM_011814	Fxr2	exonic	825
chr11:69970561-69970742-	0	0	0	2	0	0	0	0	0	6.58545	6.58545	6.58545	9.93954	6.58545	6.58545	6.58545	6.58545	6.58545	chr11	69970560	69970742	-		novel	NM_018740	Elp5	exonic	182
chr11:70874746-70884968+	7	4	4	0	1	3	0	5	1	11.6864	10.4625	11.2859	6.58545	8.98942	10.1502	6.58545	10.9535	8.94889	chr11	70874745	70884968	+	mm9_circ_001848	circBase	NM_019400	Rabep1	exonic	333
chr11:70874746-70887171+	1	1	0	0	0	1	0	2	0	9.11153	8.73056	6.58545	6.58545	6.58545	8.79054	6.58545	9.73278	6.58545	chr11	70874745	70887171	+	mm9_circ_001327	circBase	NM_019400	Rabep1	exonic	494
chr11:70874746-70908517+	0	0	0	0	0	0	2	0	0	6.58545	6.58545	6.58545	6.58545	6.58545	6.58545	9.74562	6.58545	6.58545	chr11	70874745	70908517	+	11_70722019_70688248_-33771|11.45|13|35	youxintian_mouse28026	NM_019400	Rabep1	exonic	1061
chr11:70900472-70919281+	0	0	0	3	0	0	0	0	0	6.58545	6.58545	6.58545	10.4767	6.58545	6.58545	6.58545	6.58545	6.58545	chr11	70900471	70919281	+		novel	NM_019400	Rabep1	exonic	1020
chr11:70900472-70925912+	0	1	0	0	1	1	0	2	0	6.58545	8.73056	6.58545	6.58545	8.98942	8.79054	6.58545	9.73278	6.58545	chr11	70900471	70925912	+	11_70739414_70713974_-25440|15.10|14|30	youxintian_mouse28026	NM_019400	Rabep1	exonic	1377
chr11:70923143-70925912+	0	0	0	0	3	0	0	0	0	6.58545	6.58545	6.58545	6.58545	10.3801	6.58545	6.58545	6.58545	6.58545	chr11	70923142	70925912	+		novel	NM_019400	Rabep1	exonic	240
chr11:72112257-72114043-	0	0	0	0	0	0	2	0	0	6.58545	6.58545	6.58545	6.58545	6.58545	6.58545	9.74562	6.58545	6.58545	chr11	72112256	72114043	-		novel	NM_001024927	Pitpnm3	sense overlapping	1787
chr11:72399874-72404004-	0	0	0	0	0	0	0	0	0	6.58545	6.58545	6.58545	6.58545	6.58545	6.58545	6.58545	6.58545	6.58545	chr11	72399873	72404004	-	11_72217506_72213376_-4130|15.86|4|5	youxintian_mouse28026	NM_177776	Smtnl2	exonic	854
chr11:72446434-72446958+	0	0	0	0	2	0	0	0	0	6.58545	6.58545	6.58545	6.58545	9.84625	6.58545	6.58545	6.58545	6.58545	chr11	72446433	72446958	+		novel	ENSMUST00000045633	Mybbp1a	intronic	525
chr11:72759916-72761509+	0	0	0	0	0	0	0	0	4	6.58545	6.58545	6.58545	6.58545	6.58545	6.58545	6.58545	6.58545	10.7216	chr11	72759915	72761509	+	11_72575011_72573418_-1593|13.54|3|3	youxintian_mouse28026	NM_009671	Ankfy1	exonic	363
chr11:72817931-72831721+	0	0	0	0	0	0	0	0	2	6.58545	6.58545	6.58545	6.58545	6.58545	6.58545	6.58545	6.58545	9.80143	chr11	72817930	72831721	+	11_72645223_72631433_-13790|15.18|7|10	youxintian_mouse28026	NM_001045536	Zzef1	exonic	1219
chr11:72817931-72844487+	0	0	0	0	0	2	0	0	0	6.58545	6.58545	6.58545	6.58545	6.58545	9.62495	6.58545	6.58545	6.58545	chr11	72817930	72844487	+	11_72657989_72631433_-26556|17.45|6|10	youxintian_mouse28026	NM_001045536	Zzef1	exonic	1559
chr11:72923110-72978805+	0	0	0	2	0	0	0	0	0	6.58545	6.58545	6.58545	9.93954	6.58545	6.58545	6.58545	6.58545	6.58545	chr11	72923109	72978805	+		novel	NM_016745	Atp2a3	sense overlapping	55696
chr11:74656423-74657339+	0	2	0	1	0	2	0	0	0	6.58545	9.5575	6.58545	9.07415	6.58545	9.62495	6.58545	6.58545	6.58545	chr11	74656422	74657339	+	mm9_circ_002017	circBase	NM_001081158	Cluh	exonic	375
chr11:74836363-74837723+	0	4	0	0	0	0	0	0	0	6.58545	10.4625	6.58545	6.58545	6.58545	6.58545	6.58545	6.58545	6.58545	chr11	74836362	74837723	+	11_74651225_74649865_-1360|18.05|2|2	youxintian_mouse28026	NM_010813	Mnt	exonic	740
chr11:74836363-74842353+	0	0	0	0	2	0	0	0	0	6.58545	6.58545	6.58545	6.58545	9.84625	6.58545	6.58545	6.58545	6.58545	chr11	74836362	74842353	+		novel	NM_010813	Mnt	exonic	933
chr11:74928993-74946219+	0	1	0	0	2	1	0	0	0	6.58545	8.73056	6.58545	6.58545	9.84625	8.79054	6.58545	6.58545	6.58545	chr11	74928992	74946219	+	11_74759721_74742495_-17226|12.64|13|19	youxintian_mouse28026	NM_001002764	Smg6	exonic	2570
chr11:74928993-74990215+	0	3	0	0	1	0	0	0	0	6.58545	10.0798	6.58545	6.58545	8.98942	6.58545	6.58545	6.58545	6.58545	chr11	74928992	74990215	+	mm9_circ_017983	circBase	NM_001002764	Smg6	exonic	2778
chr11:75390072-75391227+	0	2	0	3	0	3	4	1	0	6.58545	9.5575	6.58545	10.4767	6.58545	10.1502	10.6626	8.88706	6.58545	chr11	75390071	75391227	+	mm9_circ_016597	circBase	NM_001102611	Smyd4	exonic	1156
chr11:75598180-75620376+	0	0	0	0	0	0	0	0	0	6.58545	6.58545	6.58545	6.58545	6.58545	6.58545	6.58545	6.58545	6.58545	chr11	75598179	75620376	+		novel	NM_008850	Pitpna	exonic	712
chr11:75751881-75759428+	0	0	0	0	0	1	2	0	0	6.58545	6.58545	6.58545	6.58545	6.58545	8.79054	9.74562	6.58545	6.58545	chr11	75751880	75759428	+	11_75572930_75565383_-7547|15.99|20|58	youxintian_mouse28026	NM_009536	Ywhae	exonic	651
chr11:76134409-76138394-	1	1	0	0	0	1	2	0	1	9.11153	8.73056	6.58545	6.58545	6.58545	8.79054	9.74562	6.58545	8.94889	chr11	76134408	76138394	-	11_75951896_75947911_-3985|17.52|12|17	youxintian_mouse28026	NM_026664	Vps53	exonic	323
chr11:76231398-76234525-	0	0	0	0	2	0	0	0	0	6.58545	6.58545	6.58545	6.58545	9.84625	6.58545	6.58545	6.58545	6.58545	chr11	76231397	76234525	-		novel	NM_026029	Glod4	sense overlapping	3128
chr11:76748508-76754800-	1	0	0	0	0	2	2	0	1	9.11153	6.58545	6.58545	6.58545	6.58545	9.62495	9.74562	6.58545	8.94889	chr11	76748507	76754800	-	11_76568302_76562010_-6292|15.57|14|29	youxintian_mouse28026	NM_016810	Gosr1	exonic	363
chr11:76750811-76754800-	0	0	0	0	0	0	0	0	0	6.58545	6.58545	6.58545	6.58545	6.58545	6.58545	6.58545	6.58545	6.58545	chr11	76750810	76754800	-		novel	NM_016810	Gosr1	exonic	288
chr11:76780331-76781259-	0	0	0	0	0	0	0	2	0	6.58545	6.58545	6.58545	6.58545	6.58545	6.58545	6.58545	9.73278	6.58545	chr11	76780330	76781259	-		novel	NM_007754	Cpd	sense overlapping	929
chr11:77132002-77138295-	0	2	0	0	0	0	0	0	0	6.58545	9.5575	6.58545	6.58545	6.58545	6.58545	6.58545	6.58545	6.58545	chr11	77132001	77138295	-	11_76951797_76945504_-6293|16.70|6|13	youxintian_mouse28026	NM_176965	Efcab5	exonic	1676
chr11:77393050-77398269+	0	0	0	0	0	0	0	0	0	6.58545	6.58545	6.58545	6.58545	6.58545	6.58545	6.58545	6.58545	6.58545	chr11	77393049	77398269	+	11_77211771_77206552_-5219|18.85|5|6	youxintian_mouse28026	NM_177710	Ssh2	exonic	169
chr11:77553673-77565839-	0	0	0	0	0	0	0	0	2	6.58545	6.58545	6.58545	6.58545	6.58545	6.58545	6.58545	6.58545	9.80143	chr11	77553672	77565839	-		novel	NM_144825	Taok1	exonic	920
chr11:77563664-77579845-	0	0	0	0	0	0	0	0	1	6.58545	6.58545	6.58545	6.58545	6.58545	6.58545	6.58545	6.58545	8.94889	chr11	77563663	77579845	-	11_77393347_77377166_-16181|19.31|9|10	youxintian_mouse28026	NM_144825	Taok1	exonic	699
chr11:77571607-77578827-	2	0	0	0	2	0	0	0	0	9.98053	6.58545	6.58545	6.58545	9.84625	6.58545	6.58545	6.58545	6.58545	chr11	77571606	77578827	-	11_77392329_77385109_-7220|17.69|2|2	youxintian_mouse28026	NM_144825	Taok1	exonic	451
chr11:77571607-77585494-	4	0	0	3	2	3	3	2	1	10.9103	6.58545	6.58545	10.4767	9.84625	10.1502	10.2758	9.73278	8.94889	chr11	77571606	77585494	-	mm9_circ_000973	circBase	NM_144825	Taok1	exonic	745
chr11:78319986-78321766+	0	1	1	1	0	1	0	2	1	6.58545	8.73056	9.44345	9.07415	6.58545	8.79054	6.58545	9.73278	8.94889	chr11	78319985	78321766	+	11_78135268_78133488_-1780|15.21|8|17	youxintian_mouse28026	NM_017407	Spag5	exonic	713
chr11:79384175-79395961+	0	0	0	0	0	0	0	1	0	6.58545	6.58545	6.58545	6.58545	6.58545	6.58545	6.58545	8.88706	6.58545	chr11	79384174	79395961	+	11_79209463_79197677_-11786|19.68|11|21	youxintian_mouse28026	NM_010897	Nf1	exonic	526
chr11:79546971-79556834+	0	0	0	2	0	0	0	0	0	6.58545	6.58545	6.58545	9.93954	6.58545	6.58545	6.58545	6.58545	6.58545	chr11	79546970	79556834	+		novel	NM_010897	Nf1	exonic	1310
chr11:79549408-79553997+	0	1	1	1	0	1	1	0	0	6.58545	8.73056	9.44345	9.07415	6.58545	8.79054	8.8986	6.58545	6.58545	chr11	79549407	79553997	+	11_79367499_79362910_-4589|16.24|11|16	youxintian_mouse28026	NM_010897	Nf1	exonic	370
chr11:80019679-80022269+	0	2	0	0	0	0	0	0	0	6.58545	9.5575	6.58545	6.58545	6.58545	6.58545	6.58545	6.58545	6.58545	chr11	80019678	80022269	+		novel	NM_199196	Suz12	exonic	284
chr11:80019679-80025954+	0	0	0	3	0	0	0	0	0	6.58545	6.58545	6.58545	10.4767	6.58545	6.58545	6.58545	6.58545	6.58545	chr11	80019678	80025954	+	11_79839456_79833181_-6275|16.43|7|11	youxintian_mouse28026	NM_199196	Suz12	exonic	678
chr11:80223903-80227332+	0	0	0	0	0	0	1	0	0	6.58545	6.58545	6.58545	6.58545	6.58545	6.58545	8.8986	6.58545	6.58545	chr11	80223902	80227332	+	11_80040834_80037405_-3429|13.33|18|72	youxintian_mouse28026	NM_021536	Rhot1	exonic	233
chr11:80242573-80251126+	0	0	0	0	0	0	0	2	0	6.58545	6.58545	6.58545	6.58545	6.58545	6.58545	6.58545	9.73278	6.58545	chr11	80242572	80251126	+		novel	NM_021536	Rhot1	exonic	777
chr11:80248438-80254862+	0	1	0	0	0	2	0	0	0	6.58545	8.73056	6.58545	6.58545	6.58545	9.62495	6.58545	6.58545	6.58545	chr11	80248437	80254862	+		novel	NM_021536	Rhot1	exonic	639
chr11:80395792-80403662+	0	0	0	0	0	0	0	3	0	6.58545	6.58545	6.58545	6.58545	6.58545	6.58545	6.58545	10.2624	6.58545	chr11	80395791	80403662	+	11_80217164_80209294_-7870|19.69|3|3	youxintian_mouse28026	NR_045038	Zfp207	exonic	311
chr11:80557434-80586960-	0	0	0	3	0	0	0	0	0	6.58545	6.58545	6.58545	10.4767	6.58545	6.58545	6.58545	6.58545	6.58545	chr11	80557433	80586960	-	11_80400462_80370936_-29526|16.36|3|3	youxintian_mouse28026	NM_177390	Myo1d	exonic	269
chr11:80637874-80671019-	0	2	1	0	4	1	1	1	0	6.58545	9.5575	9.44345	6.58545	10.769	8.79054	8.8986	8.88706	6.58545	chr11	80637873	80671019	-	11_80484521_80451376_-33145|21.50|7|8	youxintian_mouse28026	NM_177390	Myo1d	exonic	825
chr11:83948445-83949694+	0	0	2	0	1	3	0	1	0	6.58545	6.58545	10.3404	6.58545	8.98942	10.1502	6.58545	8.88706	6.58545	chr11	83948444	83949694	+	11_83763196_83761947_-1249|16.38|14|38	youxintian_mouse28026	NM_030096	Ddx52	exonic	256
chr11:84193079-84195687+	0	0	0	0	4	1	0	2	0	6.58545	6.58545	6.58545	6.58545	10.769	8.79054	6.58545	9.73278	6.58545	chr11	84193078	84195687	+	mm9_circ_010321	circBase	uc007kqg.1	Acaca	exonic	297
chr11:84442566-84449187-	0	0	0	2	0	0	0	0	0	6.58545	6.58545	6.58545	9.93954	6.58545	6.58545	6.58545	6.58545	6.58545	chr11	84442565	84449187	-	11_84262689_84256068_-6621|20.18|8|11	youxintian_mouse28026	NM_019816	Aatf	exonic	221
chr11:84467461-84473166-	0	1	0	2	0	0	0	1	0	6.58545	8.73056	6.58545	9.93954	6.58545	6.58545	6.58545	8.88706	6.58545	chr11	84467460	84473166	-	11_84286668_84280963_-5705|22.11|8|11	youxintian_mouse28026	NM_019816	Aatf	exonic	563
chr11:84959151-84959336+	0	0	0	2	0	0	0	0	0	6.58545	6.58545	6.58545	9.93954	6.58545	6.58545	6.58545	6.58545	6.58545	chr11	84959150	84959336	+		novel	ENSMUST00000103194	Car4	intronic	186
chr11:85326864-85332375+	0	1	0	0	0	0	2	0	0	6.58545	8.73056	6.58545	6.58545	6.58545	6.58545	9.74562	6.58545	6.58545	chr11	85326863	85332375	+	11_85145877_85140366_-5511|17.30|6|8	youxintian_mouse28026	NM_016910	Ppm1d	exonic	354
chr11:85326864-85339796+	0	1	3	0	0	0	0	0	0	6.58545	8.73056	10.8892	6.58545	6.58545	6.58545	6.58545	6.58545	6.58545	chr11	85326863	85339796	+	11_85153298_85140366_-12932|15.27|15|24	youxintian_mouse28026	NM_016910	Ppm1d	exonic	788
chr11:86135259-86148557-	1	0	0	0	0	0	0	3	0	9.11153	6.58545	6.58545	6.58545	6.58545	6.58545	6.58545	10.2624	6.58545	chr11	86135258	86148557	-	11_85962059_85948761_-13298|20.05|3|4	youxintian_mouse28026	NM_178309	Brip1	exonic	957
chr11:86303534-86308912-	0	0	0	0	0	1	2	0	0	6.58545	6.58545	6.58545	6.58545	6.58545	8.79054	9.74562	6.58545	6.58545	chr11	86303533	86308912	-		novel	NM_001080931	Med13	exonic	415
chr11:86345860-86346028-	0	0	1	0	0	0	0	0	0	6.58545	6.58545	9.44345	6.58545	6.58545	6.58545	6.58545	6.58545	6.58545	chr11	86345859	86346028	-	11_86159530_86159362_-168|17.52|5|6	youxintian_mouse28026	NM_001080931	Med13	exonic	169
chr11:86532612-86537309-	0	0	0	0	0	0	0	0	3	6.58545	6.58545	6.58545	6.58545	6.58545	6.58545	6.58545	6.58545	10.3337	chr11	86532611	86537309	-		novel	NM_028259	Rps6kb1	sense overlapping	4698
chr11:86532772-86534146-	0	0	0	0	0	0	0	3	0	6.58545	6.58545	6.58545	6.58545	6.58545	6.58545	6.58545	10.2624	6.58545	chr11	86532771	86534146	-	11_86347648_86346274_-1374|14.06|6|6	youxintian_mouse28026	NM_028259	Rps6kb1	exonic	190
chr11:86532772-86535460-	1	1	1	0	2	2	3	1	0	9.11153	8.73056	9.44345	6.58545	9.84625	9.62495	10.2758	8.88706	6.58545	chr11	86532771	86535460	-	11_86348962_86346274_-2688|13.28|26|142	youxintian_mouse28026	NM_028259	Rps6kb1	exonic	240
chr11:86661123-86665878-	0	0	0	0	0	0	0	0	0	6.58545	6.58545	6.58545	6.58545	6.58545	6.58545	6.58545	6.58545	6.58545	chr11	86661122	86665878	-	11_86479380_86474625_-4755|14.90|17|42	youxintian_mouse28026	NM_029478	Vmp1	exonic	440
chr11:86721575-86737278-	0	2	0	0	0	0	0	0	0	6.58545	9.5575	6.58545	6.58545	6.58545	6.58545	6.58545	6.58545	6.58545	chr11	86721574	86737278	-		novel	NM_001003908	Cltc	exonic	1602
chr11:87041788-87059560-	0	0	0	0	0	1	1	3	0	6.58545	6.58545	6.58545	6.58545	6.58545	8.79054	8.8986	10.2624	6.58545	chr11	87041787	87059560	-	11_86873062_86855290_-17772|19.96|14|29	youxintian_mouse28026	NM_025638	Gdpd1	exonic	525
chr11:87159821-87163869+	0	0	0	0	0	0	0	0	0	6.58545	6.58545	6.58545	6.58545	6.58545	6.58545	6.58545	6.58545	6.58545	chr11	87159820	87163869	+		novel	NM_197987	Trim37	exonic	176
chr11:87190074-87206953+	0	0	0	0	0	2	0	0	0	6.58545	6.58545	6.58545	6.58545	6.58545	9.62495	6.58545	6.58545	6.58545	chr11	87190073	87206953	+	11_87020455_87003576_-16879|14.37|2|2	youxintian_mouse28026	NM_197987	Trim37	exonic	903
chr11:88049977-88051332+	1	0	0	0	0	0	0	0	0	9.11153	6.58545	6.58545	6.58545	6.58545	6.58545	6.58545	6.58545	6.58545	chr11	88049976	88051332	+	11_87864834_87863479_-1355|14.50|19|33	youxintian_mouse28026	NM_173374	Srsf1	sense overlapping	1356
chr11:88073057-88076374+	0	1	1	0	0	0	0	0	0	6.58545	8.73056	9.44345	6.58545	6.58545	6.58545	6.58545	6.58545	6.58545	chr11	88073056	88076374	+	11_87889876_87886559_-3317|15.44|5|7	youxintian_mouse28026	NM_016686	Vezf1	exonic	943
chr11:88560355-88561395-	0	0	0	0	0	0	0	0	0	6.58545	6.58545	6.58545	6.58545	6.58545	6.58545	6.58545	6.58545	6.58545	chr11	88560354	88561395	-		novel	ENSMUST00000092794	Msi2	intronic	1041
chr11:89004729-89016794+	0	3	0	0	0	1	0	0	0	6.58545	10.0798	6.58545	6.58545	6.58545	8.79054	6.58545	6.58545	6.58545	chr11	89004728	89016794	+	11_88878108_88866043_-12065|16.13|2|4	youxintian_mouse28026	NM_009546	Trim25	sense overlapping	12066
chr11:89041448-89049900-	1	0	0	0	0	0	0	0	0	9.11153	6.58545	6.58545	6.58545	6.58545	6.58545	6.58545	6.58545	6.58545	chr11	89041447	89049900	-	11_88911214_88902762_-8452|18.26|16|43	youxintian_mouse28026	NM_019505	Dgke	exonic	478
chr11:89042162-89049900-	0	0	0	0	0	2	0	0	0	6.58545	6.58545	6.58545	6.58545	6.58545	9.62495	6.58545	6.58545	6.58545	chr11	89042161	89049900	-	11_88911214_88903476_-7738|19.53|22|76	youxintian_mouse28026	NM_019505	Dgke	exonic	366
chr11:89048889-89052546-	0	0	0	0	0	0	0	0	0	6.58545	6.58545	6.58545	6.58545	6.58545	6.58545	6.58545	6.58545	6.58545	chr11	89048888	89052546	-	11_88913860_88910203_-3657|15.86|4|5	youxintian_mouse28026	NM_019505	Dgke	exonic	588
chr11:93905159-93912458+	0	1	0	0	2	0	0	0	1	6.58545	8.73056	6.58545	6.58545	9.84625	6.58545	6.58545	6.58545	8.94889	chr11	93905158	93912458	+	mm9_circ_012849	circBase	NM_134012	Mbtd1	exonic	541
chr11:93905163-93912458+	0	0	0	0	0	0	0	2	1	6.58545	6.58545	6.58545	6.58545	6.58545	6.58545	6.58545	9.73278	8.94889	chr11	93905162	93912458	+		novel	NM_134012	Mbtd1	sense overlapping	7296
chr11:93931813-93932303+	0	0	0	0	2	0	0	0	0	6.58545	6.58545	6.58545	6.58545	9.84625	6.58545	6.58545	6.58545	6.58545	chr11	93931812	93932303	+		novel	uc007kxr.2	Mbtd1	intronic	491
chr11:94036600-94048558+	0	1	0	1	0	0	1	2	0	6.58545	8.73056	6.58545	9.07415	6.58545	6.58545	8.8986	9.73278	6.58545	chr11	94036599	94048558	+	11_93909872_93897914_-11958|15.42|21|60	youxintian_mouse28026	NM_027569	Spag9	exonic	317
chr11:94303842-94309691-	0	0	0	2	0	0	0	0	0	6.58545	6.58545	6.58545	9.93954	6.58545	6.58545	6.58545	6.58545	6.58545	chr11	94303841	94309691	-	11_94171005_94165156_-5849|19.47|6|6	youxintian_mouse28026	NM_026313	Luc7l3	exonic	252
chr11:95289772-95294645-	0	0	2	0	0	1	0	0	0	6.58545	6.58545	10.3404	6.58545	6.58545	8.79054	6.58545	6.58545	6.58545	chr11	95289771	95294645	-	11_95155959_95151086_-4873|19.84|3|3	youxintian_mouse28026	NM_177619	Kat7	exonic	182
chr11:95888807-95891973-	0	0	0	0	2	0	0	0	0	6.58545	6.58545	6.58545	6.58545	9.84625	6.58545	6.58545	6.58545	6.58545	chr11	95888806	95891973	-		novel	NM_008081	B4galnt2	exonic	461
chr11:95904922-95906486-	0	0	0	0	0	0	0	2	0	6.58545	6.58545	6.58545	6.58545	6.58545	6.58545	6.58545	9.73278	6.58545	chr11	95904921	95906486	-		novel	ENSMUST00000038343	B4galnt2	intronic	1565
chr11:96073108-96075581-	0	0	0	0	0	0	2	0	0	6.58545	6.58545	6.58545	6.58545	6.58545	6.58545	9.74562	6.58545	6.58545	chr11	96073107	96075581	-		novel	NM_007506	Atp5g1	sense overlapping	2474
chr11:96262812-96264845+	1	0	1	2	0	0	0	0	0	9.11153	6.58545	9.44345	9.93954	6.58545	6.58545	6.58545	6.58545	6.58545	chr11	96262811	96264845	+		novel	NR_037977	Gm53	sense overlapping	2034
chr11:96264174-96264845+	1	0	0	1	4	1	0	1	0	9.11153	6.58545	6.58545	9.07415	10.769	8.79054	6.58545	8.88706	6.58545	chr11	96264173	96264845	+		novel	AK085288		intronic	672
chr11:96322111-96323445+	2	0	1	0	0	0	0	0	0	9.98053	6.58545	9.44345	6.58545	6.58545	6.58545	6.58545	6.58545	6.58545	chr11	96322110	96323445	+		novel	NM_001079869	Hoxb3	sense overlapping	1335
chr11:97212280-97213187-	0	1	0	0	0	0	0	0	2	6.58545	8.73056	6.58545	6.58545	6.58545	6.58545	6.58545	6.58545	9.80143	chr11	97212279	97213187	-		novel	NM_008942	Npepps	exonic	204
chr11:97226729-97238258-	1	2	0	0	0	0	0	0	0	9.11153	9.5575	6.58545	6.58545	6.58545	6.58545	6.58545	6.58545	6.58545	chr11	97226728	97238258	-	11_97099572_97088043_-11529|24.60|8|15	youxintian_mouse28026	NM_008942	Npepps	exonic	645
chr11:97377936-97378711+	1	0	1	0	1	0	1	0	0	9.11153	6.58545	9.44345	6.58545	8.98942	6.58545	8.8986	6.58545	6.58545	chr11	97377935	97378711	+	11_97240025_97239250_-775|21.88|5|5	youxintian_mouse28026	NM_138657	Socs7	exonic	300
chr11:97877957-97879588-	0	0	0	0	0	2	0	0	0	6.58545	6.58545	6.58545	6.58545	6.58545	9.62495	6.58545	6.58545	6.58545	chr11	97877956	97879588	-	11_97740902_97739271_-1631|16.83|9|27	youxintian_mouse28026	NM_001081435	Fbxo47	exonic	376
chr11:97938530-97956566-	0	0	0	0	0	0	0	0	0	6.58545	6.58545	6.58545	6.58545	6.58545	6.58545	6.58545	6.58545	6.58545	chr11	97938529	97956566	-	11_97817880_97799844_-18036|19.30|2|3	youxintian_mouse28026	NM_028199	Plxdc1	exonic	734
chr11:98163800-98169452-	0	0	0	0	0	0	0	0	0	6.58545	6.58545	6.58545	6.58545	6.58545	6.58545	6.58545	6.58545	6.58545	chr11	98163799	98169452	-	11_98030766_98025114_-5652|13.79|2|2	youxintian_mouse28026	NM_013634	Med1	exonic	648
chr11:98263470-98267858+	0	0	1	0	2	3	0	1	0	6.58545	6.58545	9.44345	6.58545	9.84625	10.1502	6.58545	8.88706	6.58545	chr11	98263469	98267858	+	mm9_circ_006636	circBase	uc007lfv.1	Cdk12	exonic	322
chr11:98263470-98278112+	0	0	0	0	0	0	0	0	0	6.58545	6.58545	6.58545	6.58545	6.58545	6.58545	6.58545	6.58545	6.58545	chr11	98263469	98278112	+	11_98139426_98124784_-14642|16.09|2|2	youxintian_mouse28026	uc007lfv.1	Cdk12	sense overlapping	14643
chr11:98372070-98373570+	0	0	0	0	0	1	0	0	0	6.58545	6.58545	6.58545	6.58545	6.58545	8.79054	6.58545	6.58545	6.58545	chr11	98372069	98373570	+	11_98234884_98233384_-1500|17.72|7|12	youxintian_mouse28026	uc007lgd.2	Stard3	exonic	436
chr11:98693383-98694293+	0	0	0	0	2	0	0	0	0	6.58545	6.58545	6.58545	6.58545	9.84625	6.58545	6.58545	6.58545	6.58545	chr11	98693382	98694293	+	11_98555607_98554697_-910|17.53|2|3	youxintian_mouse28026	NM_009439	Psmd3	exonic	495
chr11:98847076-98847409+	0	3	0	0	1	1	0	0	2	6.58545	10.0798	6.58545	6.58545	8.98942	8.79054	6.58545	6.58545	9.80143	chr11	98847075	98847409	+		novel	NM_001080925	Rapgefl1	exonic	221
chr11:98884974-98899855+	1	0	0	0	0	0	0	0	2	9.11153	6.58545	6.58545	6.58545	6.58545	6.58545	6.58545	6.58545	9.80143	chr11	98884973	98899855	+		novel	NM_197940	Wipf2	sense overlapping	14882
chr11:98996729-99001441-	0	0	0	0	0	0	0	0	0	6.58545	6.58545	6.58545	6.58545	6.58545	6.58545	6.58545	6.58545	6.58545	chr11	98996728	99001441	-		novel	NM_011623	Top2a	exonic	759
chr11:99012021-99018941-	0	0	0	0	2	0	0	0	0	6.58545	6.58545	6.58545	6.58545	9.84625	6.58545	6.58545	6.58545	6.58545	chr11	99012020	99018941	-		novel	NM_011623	Top2a	exonic	1010
chr11:100141661-100142121-	1	0	0	1	3	1	1	3	3	9.11153	6.58545	6.58545	9.07415	10.3801	8.79054	8.8986	10.2624	10.3337	chr11	100141660	100142121	-		novel	NM_008471	Krt19	sense overlapping	461
chr11:100462788-100464445-	0	2	0	0	0	0	0	0	0	6.58545	9.5575	6.58545	6.58545	6.58545	6.58545	6.58545	6.58545	6.58545	chr11	100462787	100464445	-	11_100325759_100324102_-1657|16.57|10|13	youxintian_mouse28026	NM_172565	Klhl11	sense overlapping	1658
chr11:100496338-100496492-	0	0	0	0	0	0	0	0	0	6.58545	6.58545	6.58545	6.58545	6.58545	6.58545	6.58545	6.58545	6.58545	chr11	100496337	100496492	-		novel	ENSMUST00000007131	Acly	intronic	155
chr11:100592855-100596240-	0	0	0	0	2	0	0	0	0	6.58545	6.58545	6.58545	6.58545	9.84625	6.58545	6.58545	6.58545	6.58545	chr11	100592854	100596240	-		novel	NM_019795	Dnajc7	exonic	194
chr11:100596166-100601816-	1	0	0	0	0	0	0	0	0	9.11153	6.58545	6.58545	6.58545	6.58545	6.58545	6.58545	6.58545	6.58545	chr11	100596165	100601816	-	11_100463130_100457480_-5650|22.37|2|3	youxintian_mouse28026	NM_019795	Dnajc7	exonic	403
chr11:100876777-100877064+	0	0	0	0	0	0	0	0	2	6.58545	6.58545	6.58545	6.58545	6.58545	6.58545	6.58545	6.58545	9.80143	chr11	100876776	100877064	+		novel	NM_011488	Stat5a	exonic	211
chr11:101207338-101208285-	0	0	0	0	2	0	0	0	0	6.58545	6.58545	6.58545	6.58545	9.84625	6.58545	6.58545	6.58545	6.58545	chr11	101207337	101208285	-		novel	NM_007970	Ezh1	exonic	256
chr11:101294970-101299076-	0	0	0	0	0	2	0	1	0	6.58545	6.58545	6.58545	6.58545	6.58545	9.62495	6.58545	8.88706	6.58545	chr11	101294969	101299076	-	mm9_circ_013854	circBase	NM_019584	Becn1	exonic	550
chr11:102165360-102167196-	0	0	0	0	0	0	0	0	0	6.58545	6.58545	6.58545	6.58545	6.58545	6.58545	6.58545	6.58545	6.58545	chr11	102165359	102167196	-		novel	NM_172947	Lsm12	exonic	237
chr11:102487500-102521071-	0	0	0	0	0	1	2	0	0	6.58545	6.58545	6.58545	6.58545	6.58545	8.79054	9.74562	6.58545	6.58545	chr11	102487499	102521071	-		novel	NM_001159492	Gpatch8	sense overlapping	33572
chr11:102500803-102528166-	1	0	0	0	0	1	0	0	0	9.11153	6.58545	6.58545	6.58545	6.58545	8.79054	6.58545	6.58545	6.58545	chr11	102500802	102528166	-	11_102389480_102362117_-27363|21.65|2|2	youxintian_mouse28026	NM_001159492	Gpatch8	exonic	372
chr11:102851757-102869170-	0	0	0	0	2	0	0	0	0	6.58545	6.58545	6.58545	6.58545	9.84625	6.58545	6.58545	6.58545	6.58545	chr11	102851756	102869170	-		novel	NM_011431	Eftud2	exonic	935
chr11:102864708-102865660-	0	0	0	0	0	0	2	0	0	6.58545	6.58545	6.58545	6.58545	6.58545	6.58545	9.74562	6.58545	6.58545	chr11	102864707	102865660	-		novel	NM_011431	Eftud2	exonic	174
chr11:103046379-103055289+	0	2	2	1	0	1	1	1	2	6.58545	9.5575	10.3404	9.07415	6.58545	8.79054	8.8986	8.88706	9.80143	chr11	103046378	103055289	+	mm9_circ_017115	circBase	NM_008707	Nmt1	exonic	356
chr11:104336549-104342511-	0	0	0	0	0	0	0	0	0	6.58545	6.58545	6.58545	6.58545	6.58545	6.58545	6.58545	6.58545	6.58545	chr11	104336548	104342511	-		novel	NM_001081045	Kansl1	exonic	329
chr11:104368680-104369563-	0	0	0	0	0	0	0	2	0	6.58545	6.58545	6.58545	6.58545	6.58545	6.58545	6.58545	9.73278	6.58545	chr11	104368679	104369563	-		novel	uc007lwm.1	Kansl1	intronic	884
chr11:104368680-104378826-	0	0	0	3	0	0	1	1	0	6.58545	6.58545	6.58545	10.4767	6.58545	6.58545	8.8986	8.88706	6.58545	chr11	104368679	104378826	-	mm9_circ_006502	circBase	NM_001081045	Kansl1	exonic	241
chr11:104423922-104425293-	0	0	0	2	2	0	0	0	0	6.58545	6.58545	6.58545	9.93954	9.84625	6.58545	6.58545	6.58545	6.58545	chr11	104423921	104425293	-	mm9_circ_017136	circBase	NM_001081045	Kansl1	exonic	1372
chr11:104423922-104426468-	3	2	2	2	4	1	1	4	4	10.519	9.5575	10.3404	9.93954	10.769	8.79054	8.8986	10.649	10.7216	chr11	104423921	104426468	-	11_104287782_104285236_-2546|15.39|23|90	youxintian_mouse28026	NM_001081045	Kansl1	sense overlapping	2547
chr11:104515372-104528732-	2	0	0	0	0	0	0	0	1	9.98053	6.58545	6.58545	6.58545	6.58545	6.58545	6.58545	6.58545	8.94889	chr11	104515371	104528732	-	11_104390046_104376686_-13360|23.05|2|2	youxintian_mouse28026	NM_145436	Cdc27	exonic	1441
chr11:105206310-105221353+	0	0	0	0	0	0	0	0	0	6.58545	6.58545	6.58545	6.58545	6.58545	6.58545	6.58545	6.58545	6.58545	chr11	105206309	105221353	+		novel	NM_001112705	Tlk2	sense overlapping	15044
chr11:105240361-105241661+	4	0	0	0	0	0	0	0	0	10.9103	6.58545	6.58545	6.58545	6.58545	6.58545	6.58545	6.58545	6.58545	chr11	105240360	105241661	+	11_105102975_105101675_-1300|16.25|2|2	youxintian_mouse28026	NM_001112705	Tlk2	exonic	189
chr11:105240361-105247595+	1	0	0	0	1	0	0	0	2	9.11153	6.58545	6.58545	6.58545	8.98942	6.58545	6.58545	6.58545	9.80143	chr11	105240360	105247595	+	11_105108909_105101675_-7234|16.98|9|15	youxintian_mouse28026	NM_001112705	Tlk2	exonic	437
chr11:105256870-105271237+	0	0	0	0	0	0	2	0	0	6.58545	6.58545	6.58545	6.58545	6.58545	6.58545	9.74562	6.58545	6.58545	chr11	105256869	105271237	+	11_105132551_105118184_-14367|17.25|3|3	youxintian_mouse28026	NM_001112705	Tlk2	exonic	573
chr11:106096991-106114283+	0	0	0	0	2	0	0	0	0	6.58545	6.58545	6.58545	6.58545	9.84625	6.58545	6.58545	6.58545	6.58545	chr11	106096990	106114283	+	11_105975597_105958305_-17292|19.45|5|5	youxintian_mouse28026	NM_011947	Map3k3	exonic	263
chr11:106096991-106123906+	0	0	0	1	0	0	0	1	0	6.58545	6.58545	6.58545	9.07415	6.58545	6.58545	6.58545	8.88706	6.58545	chr11	106096990	106123906	+	11_105985220_105958305_-26915|18.53|16|31	youxintian_mouse28026	NM_011947	Map3k3	exonic	498
chr11:106114184-106117603+	0	2	0	0	0	2	0	0	0	6.58545	9.5575	6.58545	6.58545	6.58545	9.62495	6.58545	6.58545	6.58545	chr11	106114183	106117603	+	11_105978917_105975498_-3419|19.84|2|5	youxintian_mouse28026	NM_011947	Map3k3	exonic	214
chr11:106208006-106213361-	0	0	0	0	2	0	0	0	0	6.58545	6.58545	6.58545	6.58545	9.84625	6.58545	6.58545	6.58545	6.58545	chr11	106208005	106213361	-		novel	NM_026009	Ccdc47	exonic	752
chr11:106421706-106423488-	0	0	0	0	0	0	0	0	0	6.58545	6.58545	6.58545	6.58545	6.58545	6.58545	6.58545	6.58545	6.58545	chr11	106421705	106423488	-		novel	NM_023913	Ern1	exonic	364
chr11:106754782-106755051+	0	1	0	0	0	0	0	3	0	6.58545	8.73056	6.58545	6.58545	6.58545	6.58545	6.58545	10.2624	6.58545	chr11	106754781	106755051	+		novel	NR_073165	Milr1	exonic	270
chr11:106768310-106775600-	0	0	0	0	2	0	0	0	0	6.58545	6.58545	6.58545	6.58545	9.84625	6.58545	6.58545	6.58545	6.58545	chr11	106768309	106775600	-		novel	NM_015810	Polg2	sense overlapping	7291
chr11:106785136-106786132-	0	0	0	0	0	2	0	0	0	6.58545	6.58545	6.58545	6.58545	6.58545	9.62495	6.58545	6.58545	6.58545	chr11	106785135	106786132	-		novel	NM_007840	Ddx5	exonic	369
chr11:106845983-106856264-	2	0	0	0	0	0	0	0	0	9.98053	6.58545	6.58545	6.58545	6.58545	6.58545	6.58545	6.58545	6.58545	chr11	106845982	106856264	-	11_106717578_106707297_-10281|15.88|4|4	youxintian_mouse28026	NM_025481	Smurf2	exonic	531
chr11:106864712-106871610-	0	0	0	0	0	0	0	0	2	6.58545	6.58545	6.58545	6.58545	6.58545	6.58545	6.58545	6.58545	9.80143	chr11	106864711	106871610	-		novel	NM_025481	Smurf2	exonic	309
chr11:107060472-107062782-	0	0	0	0	0	0	0	0	0	6.58545	6.58545	6.58545	6.58545	6.58545	6.58545	6.58545	6.58545	6.58545	chr11	107060471	107062782	-	11_106924096_106921786_-2310|16.61|3|4	youxintian_mouse28026	NM_176850	Bptf	exonic	508
chr11:107095002-107099789-	0	0	0	0	0	0	0	0	0	6.58545	6.58545	6.58545	6.58545	6.58545	6.58545	6.58545	6.58545	6.58545	chr11	107095001	107099789	-	11_106961103_106956316_-4787|15.26|3|3	youxintian_mouse28026	uc007mag.1	Bptf	exonic	623
chr11:107110813-107111635-	2	2	0	0	1	0	1	0	2	9.98053	9.5575	6.58545	6.58545	8.98942	6.58545	8.8986	6.58545	9.80143	chr11	107110812	107111635	-	11_106972949_106972127_-822|16.60|14|44	youxintian_mouse28026	NM_176850	Bptf	exonic	823
chr11:107592706-107595195+	1	0	2	0	0	0	0	0	0	9.11153	6.58545	10.3404	6.58545	6.58545	6.58545	6.58545	6.58545	6.58545	chr11	107592705	107595195	+	11_107456509_107454020_-2489|18.59|5|5	youxintian_mouse28026	NM_198298	Helz	exonic	182
chr11:107592706-107602508+	0	0	0	0	0	0	2	0	0	6.58545	6.58545	6.58545	6.58545	6.58545	6.58545	9.74562	6.58545	6.58545	chr11	107592705	107602508	+		novel	NM_198298	Helz	exonic	509
chr11:107592706-107604363+	1	0	0	0	0	0	0	0	0	9.11153	6.58545	6.58545	6.58545	6.58545	6.58545	6.58545	6.58545	6.58545	chr11	107592705	107604363	+	11_107465677_107454020_-11657|18.75|13|33	youxintian_mouse28026	NM_198298	Helz	exonic	915
chr11:107632172-107637927+	0	0	0	0	0	0	2	0	0	6.58545	6.58545	6.58545	6.58545	6.58545	6.58545	9.74562	6.58545	6.58545	chr11	107632171	107637927	+		novel	NM_198298	Helz	exonic	592
chr11:107634980-107673045+	0	0	0	0	0	0	0	0	0	6.58545	6.58545	6.58545	6.58545	6.58545	6.58545	6.58545	6.58545	6.58545	chr11	107634979	107673045	+		novel	NM_198298	Helz	exonic	2951
chr11:107661842-107663815+	0	0	0	0	1	0	0	0	2	6.58545	6.58545	6.58545	6.58545	8.98942	6.58545	6.58545	6.58545	9.80143	chr11	107661841	107663815	+		novel	NM_198298	Helz	exonic	399
chr11:107685291-107686890+	0	0	0	0	0	0	0	2	0	6.58545	6.58545	6.58545	6.58545	6.58545	6.58545	6.58545	9.73278	6.58545	chr11	107685290	107686890	+	11_107548204_107546605_-1599|14.76|2|2	youxintian_mouse28026	NM_198298	Helz	sense overlapping	1600
chr11:108012627-108014381-	0	0	0	0	0	0	2	0	0	6.58545	6.58545	6.58545	6.58545	6.58545	6.58545	9.74562	6.58545	6.58545	chr11	108012626	108014381	-		novel	NM_011101	Prkca	exonic	389
chr11:108434126-108440596+	1	8	0	1	1	2	1	2	4	9.11153	11.4126	6.58545	9.07415	8.98942	9.62495	8.8986	9.73278	10.7216	chr11	108434125	108440596	+	11_108301910_108295440_-6470|16.49|11|15	youxintian_mouse28026	NM_029606	Cep112	exonic	478
chr11:108434126-108472094+	0	0	0	0	0	2	0	0	0	6.58545	6.58545	6.58545	6.58545	6.58545	9.62495	6.58545	6.58545	6.58545	chr11	108434125	108472094	+		novel	NM_029606	Cep112	exonic	647
chr11:108434126-108531465+	0	0	0	0	2	1	0	0	0	6.58545	6.58545	6.58545	6.58545	9.84625	8.79054	6.58545	6.58545	6.58545	chr11	108434125	108531465	+		novel	NM_029606	Cep112	exonic	1741
chr11:108518679-108531465+	1	2	1	0	1	0	0	0	0	9.11153	9.5575	9.44345	6.58545	8.98942	6.58545	6.58545	6.58545	6.58545	chr11	108518678	108531465	+	11_108392779_108379993_-12786|16.65|19|93	Guojunjie2014_mouse635	NM_029606	Cep112	exonic	518
chr11:108518679-108591111+	0	0	0	0	0	0	0	0	0	6.58545	6.58545	6.58545	6.58545	6.58545	6.58545	6.58545	6.58545	6.58545	chr11	108518678	108591111	+	11_108452425_108379993_-72432|14.20|3|3	youxintian_mouse28026	NM_029606	Cep112	exonic	762
chr11:108923152-108931579+	0	1	0	0	1	0	0	0	3	6.58545	8.73056	6.58545	6.58545	8.98942	6.58545	6.58545	6.58545	10.3337	chr11	108923151	108931579	+	mm9_circ_010014	circBase	NM_015732	Axin2	exonic	1092
chr11:109971685-109977873-	0	0	0	0	0	0	0	0	0	6.58545	6.58545	6.58545	6.58545	6.58545	6.58545	6.58545	6.58545	6.58545	chr11	109971684	109977873	-	mm9_circ_012245	circBase	NM_013851	Abca8b	exonic	976
chr11:113133149-113133314-	0	2	0	0	0	0	0	0	0	6.58545	9.5575	6.58545	6.58545	6.58545	6.58545	6.58545	6.58545	6.58545	chr11	113133148	113133314	-		novel	uc011ygz.1	2610035D17Rik	intronic	166
chr11:115815698-115817105+	0	0	0	0	0	0	0	0	0	6.58545	6.58545	6.58545	6.58545	6.58545	6.58545	6.58545	6.58545	6.58545	chr11	115815697	115817105	+		novel	NM_029557	Tsen54	exonic	152
chr11:115882877-115891207+	0	0	0	0	0	0	0	2	0	6.58545	6.58545	6.58545	6.58545	6.58545	6.58545	6.58545	9.73278	6.58545	chr11	115882876	115891207	+		novel	uc007miu.1	Myo15b	sense overlapping	8331
chr11:116160062-116163359-	0	0	0	0	0	0	0	0	0	6.58545	6.58545	6.58545	6.58545	6.58545	6.58545	6.58545	6.58545	6.58545	chr11	116160061	116163359	-		novel	NM_172571	Fbf1	exonic	176
chr11:116180943-116182020-	0	2	0	0	0	0	1	0	0	6.58545	9.5575	6.58545	6.58545	6.58545	6.58545	8.8986	6.58545	6.58545	chr11	116180942	116182020	-		novel	NM_015729	Acox1	exonic	228
chr11:116233386-116234523-	0	0	0	0	4	0	0	1	1	6.58545	6.58545	6.58545	6.58545	10.769	6.58545	6.58545	8.88706	8.94889	chr11	116233385	116234523	-	11_116095837_116094700_-1137|15.75|4|7	youxintian_mouse28026	NM_025276	Evpl	exonic	408
chr11:116262860-116263297-	0	0	0	0	1	0	0	0	0	6.58545	6.58545	6.58545	6.58545	8.98942	6.58545	6.58545	6.58545	6.58545	chr11	116262859	116263297	-	mm9_circ_011501	circBase	NM_146032	Srp68	exonic	193
chr11:116850908-116852098-	0	0	0	0	0	0	0	0	2	6.58545	6.58545	6.58545	6.58545	6.58545	6.58545	6.58545	6.58545	9.80143	chr11	116850907	116852098	-		novel	NM_011358	Srsf2	sense overlapping	1191
chr11:117290398-117291036+	0	0	0	0	0	0	0	1	1	6.58545	6.58545	6.58545	6.58545	6.58545	6.58545	6.58545	8.88706	8.94889	chr11	117290397	117291036	+	11_117152350_117151712_-638|21.88|9|19	youxintian_mouse28026	NM_001113486	Sept9	exonic	639
chr11:117752977-117756106+	0	0	2	0	0	0	0	0	0	6.58545	6.58545	10.3404	6.58545	6.58545	6.58545	6.58545	6.58545	6.58545	chr11	117752976	117756106	+	11_117617420_117614291_-3129|17.45|3|3	youxintian_mouse28026	NM_198022	Tnrc6c	exonic	504
chr11:121602988-121611748+	0	0	0	0	0	0	0	0	0	6.58545	6.58545	6.58545	6.58545	6.58545	6.58545	6.58545	6.58545	6.58545	chr11	121602987	121611748	+	11_121473062_121464302_-8760|20.55|2|2	youxintian_mouse28026	NM_029878	Tbcd	exonic	871
chr12:3442474-3457209+	0	2	0	1	2	1	0	1	2	6.58545	9.5575	6.58545	9.07415	9.84625	8.79054	6.58545	8.88706	9.80143	chr12	3442473	3457209	+	mm9_circ_007078	circBase	NM_172421	Asxl2	exonic	343
chr12:3442474-3469593+	0	0	0	0	0	2	0	0	0	6.58545	6.58545	6.58545	6.58545	6.58545	9.62495	6.58545	6.58545	6.58545	chr12	3442473	3469593	+	12_3469593_3442474_-27119|22.14|7|10	youxintian_mouse28026	NM_172421	Asxl2	exonic	459
chr12:3442474-3496936+	0	0	0	0	0	0	0	0	2	6.58545	6.58545	6.58545	6.58545	6.58545	6.58545	6.58545	6.58545	9.80143	chr12	3442473	3496936	+	12_3496936_3442474_-54462|20.05|10|14	youxintian_mouse28026	NM_172421	Asxl2	exonic	1662
chr12:3442474-3507159+	0	0	0	0	0	0	0	0	0	6.58545	6.58545	6.58545	6.58545	6.58545	6.58545	6.58545	6.58545	6.58545	chr12	3442473	3507159	+		novel	NM_172421	Asxl2	sense overlapping	64686
chr12:3469478-3484608+	0	0	0	0	0	0	0	2	0	6.58545	6.58545	6.58545	6.58545	6.58545	6.58545	6.58545	9.73278	6.58545	chr12	3469477	3484608	+		novel	NM_172421	Asxl2	exonic	404
chr12:3617606-3648389+	0	0	0	1	1	3	1	1	0	6.58545	6.58545	6.58545	9.07415	8.98942	10.1502	8.8986	8.88706	6.58545	chr12	3617605	3648389	+	mm9_circ_018538	circBase	NM_007886	Dtnb	exonic	514
chr12:3748425-3751907+	0	0	0	0	0	0	0	2	0	6.58545	6.58545	6.58545	6.58545	6.58545	6.58545	6.58545	9.73278	6.58545	chr12	3748424	3751907	+	12_3751907_3748425_-3482|15.60|4|4	youxintian_mouse28026	NM_007886	Dtnb	exonic	297
chr12:3835027-3873428+	0	0	0	0	0	0	2	0	0	6.58545	6.58545	6.58545	6.58545	6.58545	6.58545	9.74562	6.58545	6.58545	chr12	3835026	3873428	+	12_3873428_3835027_-38401|19.42|16|70	youxintian_mouse28026	NM_007872	Dnmt3a	exonic	798
chr12:3835027-3904225+	0	0	0	0	0	0	0	3	0	6.58545	6.58545	6.58545	6.58545	6.58545	6.58545	6.58545	10.2624	6.58545	chr12	3835026	3904225	+		novel	NM_007872	Dnmt3a	exonic	2567
chr12:4322868-4344502-	0	2	0	0	0	0	0	0	0	6.58545	9.5575	6.58545	6.58545	6.58545	6.58545	6.58545	6.58545	6.58545	chr12	4322867	4344502	-	12_4344502_4322868_-21634|14.34|2|2	youxintian_mouse28026	NM_010881	Ncoa1	exonic	549
chr12:4630637-4633562+	0	0	0	0	2	0	0	0	0	6.58545	6.58545	6.58545	6.58545	9.84625	6.58545	6.58545	6.58545	6.58545	chr12	4630636	4633562	+	12_4640368_4637443_-2925|14.19|12|27	youxintian_mouse28026	NM_011365	Itsn2	exonic	428
chr12:4637739-4664622+	0	0	2	0	0	0	1	0	0	6.58545	6.58545	10.3404	6.58545	6.58545	6.58545	8.8986	6.58545	6.58545	chr12	4637738	4664622	+	12_4671428_4644545_-26883|16.61|4|5	youxintian_mouse28026	NM_011365	Itsn2	exonic	1198
chr12:4762327-4764147-	0	2	0	0	0	0	0	0	0	6.58545	9.5575	6.58545	6.58545	6.58545	6.58545	6.58545	6.58545	6.58545	chr12	4762326	4764147	-	12_4770953_4769133_-1820|19.28|20|635	youxintian_mouse28026	NM_175431	Fam228b	exonic	342
chr12:4891315-4894679-	0	0	0	0	2	0	0	0	0	6.58545	6.58545	6.58545	6.58545	9.84625	6.58545	6.58545	6.58545	6.58545	chr12	4891314	4894679	-		novel	NM_145441	Ubxn2a	exonic	249
chr12:4941972-4954657+	1	0	0	0	0	0	0	0	0	9.11153	6.58545	6.58545	6.58545	6.58545	6.58545	6.58545	6.58545	6.58545	chr12	4941971	4954657	+	12_4961463_4948778_-12685|13.17|3|5	youxintian_mouse28026	NM_001099628	Atad2b	exonic	616
chr12:4961218-4978588+	0	0	0	0	1	0	0	1	0	6.58545	6.58545	6.58545	6.58545	8.98942	6.58545	6.58545	8.88706	6.58545	chr12	4961217	4978588	+	12_4985394_4968024_-17370|17.79|13|28	youxintian_mouse28026	NM_001099628	Atad2b	sense overlapping	17371
chr12:4961218-5006791+	1	2	0	0	0	0	0	0	1	9.11153	9.5575	6.58545	6.58545	6.58545	6.58545	6.58545	6.58545	8.94889	chr12	4961217	5006791	+	mm9_circ_015239	circBase	NM_001099628	Atad2b	exonic	1170
chr12:8227220-8238615+	1	0	0	0	0	0	0	0	2	9.11153	6.58545	6.58545	6.58545	6.58545	6.58545	6.58545	6.58545	9.80143	chr12	8227219	8238615	+	12_8245421_8234026_-11395|18.78|4|4	youxintian_mouse28026	NM_172401	1110057K04Rik	exonic	317
chr12:8268364-8275890+	0	2	0	0	0	0	0	3	0	6.58545	9.5575	6.58545	6.58545	6.58545	6.58545	6.58545	10.2624	6.58545	chr12	8268363	8275890	+	12_8282696_8275170_-7526|17.04|11|31	youxintian_mouse28026	NM_172401	1110057K04Rik	exonic	318
chr12:13469841-13484044+	0	0	0	4	0	0	0	0	1	6.58545	6.58545	6.58545	10.8672	6.58545	6.58545	6.58545	6.58545	8.94889	chr12	13469840	13484044	+	12_13490850_13476647_-14203|16.21|14|27	youxintian_mouse28026	NM_027706	Nbas	exonic	927
chr12:13482386-13484044+	1	3	0	0	0	4	3	0	4	9.11153	10.0798	6.58545	6.58545	6.58545	10.5344	10.2758	6.58545	10.7216	chr12	13482385	13484044	+	12_13490850_13489192_-1658|16.13|23|94	youxintian_mouse28026	NM_027706	Nbas	exonic	586
chr12:16959402-16966693+	0	0	0	0	0	0	0	4	0	6.58545	6.58545	6.58545	6.58545	6.58545	6.58545	6.58545	10.649	6.58545	chr12	16959401	16966693	+		novel	NM_009072	Rock2	exonic	683
chr12:17402073-17406896+	0	0	0	2	0	0	0	0	0	6.58545	6.58545	6.58545	9.93954	6.58545	6.58545	6.58545	6.58545	6.58545	chr12	17402072	17406896	+	12_17413702_17408879_-4823|21.30|12|21	youxintian_mouse28026	NM_001008421	Nol10	exonic	396
chr12:21203960-21206388+	0	0	0	0	0	0	0	0	0	6.58545	6.58545	6.58545	6.58545	6.58545	6.58545	6.58545	6.58545	6.58545	chr12	21203959	21206388	+	12_21212249_21209821_-2428|17.55|5|7	youxintian_mouse28026	NM_001004364	Asap2	exonic	216
chr12:21224305-21230956+	0	0	2	0	0	0	0	0	0	6.58545	6.58545	10.3404	6.58545	6.58545	6.58545	6.58545	6.58545	6.58545	chr12	21224304	21230956	+	12_21236817_21230166_-6651|16.19|11|20	youxintian_mouse28026	NM_001004364	Asap2	exonic	438
chr12:24878191-24882794+	0	1	0	0	1	2	0	1	0	6.58545	8.73056	6.58545	6.58545	8.98942	9.62495	6.58545	8.88706	6.58545	chr12	24878190	24882794	+	mm9_circ_018655	circBase	NM_026037	Mboat2	exonic	224
chr12:24878191-24924294+	2	4	1	0	0	1	0	3	0	9.98053	10.4625	9.44345	6.58545	6.58545	8.79054	6.58545	10.2624	6.58545	chr12	24878190	24924294	+	mm9_circ_013240	circBase	NM_026037	Mboat2	exonic	320
chr12:24994812-24997330+	0	0	0	0	1	0	2	0	1	6.58545	6.58545	6.58545	6.58545	8.98942	6.58545	9.74562	6.58545	8.94889	chr12	24994811	24997330	+		novel	NM_001081378	Kidins220	exonic	297
chr12:28859252-28867153+	0	1	0	0	2	0	1	2	0	6.58545	8.73056	6.58545	6.58545	9.84625	6.58545	8.8986	9.73278	6.58545	chr12	28859251	28867153	+	12_29552018_29544117_-7901|13.83|17|95	youxintian_mouse28026	NM_201357	Tssc1	sense overlapping	7902
chr12:31624115-31630893-	0	0	0	0	3	0	0	1	0	6.58545	6.58545	6.58545	6.58545	10.3801	6.58545	6.58545	8.88706	6.58545	chr12	31624114	31630893	-	12_32315758_32308980_-6778|11.79|14|25	youxintian_mouse28026	NM_007530	Bcap29	exonic	388
chr12:31797185-31839854+	0	3	0	0	0	0	0	0	0	6.58545	10.0798	6.58545	6.58545	6.58545	6.58545	6.58545	6.58545	6.58545	chr12	31797184	31839854	+		novel	NM_001163126	Cog5	sense overlapping	42670
chr12:31833182-31839854+	0	0	2	1	1	0	1	1	0	6.58545	6.58545	10.3404	9.07415	8.98942	6.58545	8.8986	8.88706	6.58545	chr12	31833181	31839854	+	12_32524719_32518047_-6672|15.10|16|31	youxintian_mouse28026	NM_001163126	Cog5	exonic	467
chr12:35078900-35082971+	0	0	0	1	0	0	0	0	0	6.58545	6.58545	6.58545	9.07415	6.58545	6.58545	6.58545	6.58545	6.58545	chr12	35078899	35082971	+	12_35767643_35763572_-4071|20.19|10|16	youxintian_mouse28026	NM_001014973	Snx13	exonic	216
chr12:35078900-35098313+	0	2	1	0	0	0	0	0	1	6.58545	9.5575	9.44345	6.58545	6.58545	6.58545	6.58545	6.58545	8.94889	chr12	35078899	35098313	+	12_35782985_35763572_-19413|20.91|6|6	youxintian_mouse28026	NM_001014973	Snx13	exonic	825
chr12:35078900-35112504+	0	0	0	0	0	2	0	0	0	6.58545	6.58545	6.58545	6.58545	6.58545	9.62495	6.58545	6.58545	6.58545	chr12	35078899	35112504	+	12_35797176_35763572_-33604|19.35|11|15	youxintian_mouse28026	NM_001014973	Snx13	exonic	1693
chr12:35085939-35107556+	1	0	0	1	0	0	0	0	1	9.11153	6.58545	6.58545	9.07415	6.58545	6.58545	6.58545	6.58545	8.94889	chr12	35085938	35107556	+	12_35792228_35770611_-21617|12.12|3|4	youxintian_mouse28026	NM_001014973	Snx13	exonic	1369
chr12:35100539-35112504+	0	0	0	0	0	0	0	0	0	6.58545	6.58545	6.58545	6.58545	6.58545	6.58545	6.58545	6.58545	6.58545	chr12	35100538	35112504	+	12_35797176_35785211_-11965|17.94|1|2	youxintian_mouse28026	NM_001014973	Snx13	exonic	868
chr12:36473102-36522051+	0	0	0	0	0	0	0	0	0	6.58545	6.58545	6.58545	6.58545	6.58545	6.58545	6.58545	6.58545	6.58545	chr12	36473101	36522051	+	12_37248638_37199689_-48949|19.19|1|2	youxintian_mouse28026	NM_178629	Ispd	exonic	429
chr12:38147503-38216108+	0	0	0	0	2	0	0	0	0	6.58545	6.58545	6.58545	6.58545	9.84625	6.58545	6.58545	6.58545	6.58545	chr12	38147502	38216108	+	12_38942695_38874090_-68605|20.46|2|2	youxintian_mouse28026	NM_178681	Dgkb	exonic	574
chr12:40363134-40410953-	0	0	0	0	2	0	0	0	0	6.58545	6.58545	6.58545	6.58545	9.84625	6.58545	6.58545	6.58545	6.58545	chr12	40363133	40410953	-		novel	NM_172575	Zfp277	exonic	752
chr12:51363417-51365559+	0	0	0	0	0	0	0	0	0	6.58545	6.58545	6.58545	6.58545	6.58545	6.58545	6.58545	6.58545	6.58545	chr12	51363416	51365559	+		novel	NM_001015099	G2e3	exonic	435
chr12:51619814-51661713-	3	3	0	1	3	0	0	0	0	10.519	10.0798	6.58545	9.07415	10.3801	6.58545	6.58545	6.58545	6.58545	chr12	51619813	51661713	-	mm9_circ_006696	circBase	NM_052973	Strn3	exonic	1852
chr12:51621780-51661713-	0	0	1	0	1	3	2	1	0	6.58545	6.58545	9.44345	6.58545	8.98942	10.1502	9.74562	8.88706	6.58545	chr12	51621779	51661713	-	mm9_circ_011824	circBase	NM_052973	Strn3	exonic	1744
chr12:51623176-51661713-	1	0	0	1	0	0	0	0	0	9.11153	6.58545	6.58545	9.07415	6.58545	6.58545	6.58545	6.58545	6.58545	chr12	51623175	51661713	-	12_52762700_52724163_-38537|15.77|6|13	youxintian_mouse28026	NM_052973	Strn3	exonic	1603
chr12:51633579-51661713-	0	1	0	0	0	0	0	0	0	6.58545	8.73056	6.58545	6.58545	6.58545	6.58545	6.58545	6.58545	6.58545	chr12	51633578	51661713	-	12_52762700_52734566_-28134|13.55|1|2	youxintian_mouse28026	NM_052973	Strn3	exonic	955
chr12:51643104-51661713-	0	3	1	0	1	0	0	3	1	6.58545	10.0798	9.44345	6.58545	8.98942	6.58545	6.58545	10.2624	8.94889	chr12	51643103	51661713	-	12_52762700_52744091_-18609|16.08|18|70	youxintian_mouse28026	NM_052973	Strn3	exonic	814
chr12:51647687-51661713-	0	0	0	0	0	0	0	0	3	6.58545	6.58545	6.58545	6.58545	6.58545	6.58545	6.58545	6.58545	10.3337	chr12	51647686	51661713	-	12_52762700_52748674_-14026|12.64|17|42	youxintian_mouse28026	NM_052973	Strn3	sense overlapping	14027
chr12:51647994-51661713-	1	15	4	2	5	12	10	12	5	9.11153	12.2955	11.2859	9.93954	11.0749	12.0557	11.9323	12.1752	11.0271	chr12	51647993	51661713	-	mm9_circ_016984	circBase	NM_052973	Strn3	exonic	703
chr12:51655402-51661713-	1	1	0	0	2	2	1	3	0	9.11153	8.73056	6.58545	6.58545	9.84625	9.62495	8.8986	10.2624	6.58545	chr12	51655401	51661713	-	mm9_circ_004275	circBase	NM_052973	Strn3	exonic	260
chr12:51716942-51723048+	0	1	0	0	0	1	0	2	0	6.58545	8.73056	6.58545	6.58545	6.58545	8.79054	6.58545	9.73278	6.58545	chr12	51716941	51723048	+	mm9_circ_001580	circBase	NM_021710	Ap4s1	exonic	365
chr12:51759219-51761170-	2	6	0	2	1	1	0	5	2	9.98053	11.0144	6.58545	9.93954	8.98942	8.79054	6.58545	10.9535	9.80143	chr12	51759218	51761170	-	mm9_circ_002888	circBase	NM_144788	Hectd1	exonic	380
chr12:51772274-51772705-	0	3	0	0	0	0	0	0	0	6.58545	10.0798	6.58545	6.58545	6.58545	6.58545	6.58545	6.58545	6.58545	chr12	51772273	51772705	-	mm9_circ_008488	circBase	NM_144788	Hectd1	exonic	344
chr12:51774651-51776630-	0	0	0	0	1	1	0	0	0	6.58545	6.58545	6.58545	6.58545	8.98942	8.79054	6.58545	6.58545	6.58545	chr12	51774650	51776630	-	12_52877617_52875638_-1979|13.09|10|11	youxintian_mouse28026	NM_144788	Hectd1	exonic	275
chr12:51785809-51802816-	0	0	0	0	0	0	0	0	0	6.58545	6.58545	6.58545	6.58545	6.58545	6.58545	6.58545	6.58545	6.58545	chr12	51785808	51802816	-	12_52903803_52886796_-17007|14.00|3|3	youxintian_mouse28026	NM_144788	Hectd1	exonic	2175
chr12:51920390-51925173-	0	0	0	0	0	0	2	0	0	6.58545	6.58545	6.58545	6.58545	6.58545	6.58545	9.74562	6.58545	6.58545	chr12	51920389	51925173	-		novel	NM_177171	Heatr5a	exonic	470
chr12:52516079-52519967+	8	24	13	13	13	27	21	33	18	11.8738	12.9632	12.9474	12.5154	12.4134	13.2075	12.984	13.6155	12.8263	chr12	52516078	52519967	+	mm9_circ_011007	circBase	uc007nni.1	Arhgap5	exonic	3889
chr12:52516079-52542636+	1	5	2	0	1	6	2	8	2	9.11153	10.7647	10.3404	6.58545	8.98942	11.0879	9.74562	11.6052	9.80143	chr12	52516078	52542636	+	12_53643623_53617066_-26557|22.70|25|356	youxintian_mouse28026	uc007nnk.1	Arhgap5	exonic	4037
chr12:53139381-53142768+	0	1	0	0	0	0	2	1	1	6.58545	8.73056	6.58545	6.58545	6.58545	6.58545	9.74562	8.88706	8.94889	chr12	53139380	53142768	+	mm9_circ_007720	circBase	NM_198111	Akap6	exonic	3388
chr12:54673571-54685971-	0	0	1	0	0	1	2	0	0	6.58545	6.58545	9.44345	6.58545	6.58545	8.79054	9.74562	6.58545	6.58545	chr12	54673570	54685971	-		novel	NM_025456	Eapp	sense overlapping	12401
chr12:55407469-55414498+	1	1	0	1	0	1	0	0	4	9.11153	8.73056	6.58545	9.07415	6.58545	8.79054	6.58545	6.58545	10.7216	chr12	55407468	55414498	+	12_56515485_56508456_-7029|19.65|15|37	youxintian_mouse28026	NM_011968	Psma6	exonic	607
chr12:55673453-55677265-	0	0	0	0	0	0	0	0	2	6.58545	6.58545	6.58545	6.58545	6.58545	6.58545	6.58545	6.58545	9.80143	chr12	55673452	55677265	-	12_56778252_56774440_-3812|17.90|16|34	youxintian_mouse28026	NM_019994	Ralgapa1	exonic	934
chr12:55738211-55739569-	0	0	0	0	0	3	0	0	0	6.58545	6.58545	6.58545	6.58545	6.58545	10.1502	6.58545	6.58545	6.58545	chr12	55738210	55739569	-	12_56840556_56839198_-1358|15.52|8|19	youxintian_mouse28026	NM_019994	Ralgapa1	exonic	400
chr12:55776019-55795776-	0	1	0	0	1	0	0	2	1	6.58545	8.73056	6.58545	6.58545	8.98942	6.58545	6.58545	9.73278	8.94889	chr12	55776018	55795776	-	12_56896763_56877006_-19757|19.75|16|46	youxintian_mouse28026	NM_019994	Ralgapa1	exonic	905
chr12:56337764-56340603-	0	0	0	0	0	0	0	0	0	6.58545	6.58545	6.58545	6.58545	6.58545	6.58545	6.58545	6.58545	6.58545	chr12	56337763	56340603	-		novel	NM_145442	Mbip	exonic	382
chr12:57325524-57332459+	1	0	0	0	0	0	0	0	0	9.11153	6.58545	6.58545	6.58545	6.58545	6.58545	6.58545	6.58545	6.58545	chr12	57325523	57332459	+	mm9_circ_017659	circBase	NM_001164370	Mipol1	exonic	335
chr12:57325524-57364234+	0	0	0	0	0	0	0	0	0	6.58545	6.58545	6.58545	6.58545	6.58545	6.58545	6.58545	6.58545	6.58545	chr12	57325523	57364234	+	12_58465221_58426511_-38710|16.79|12|24	youxintian_mouse28026	NM_001164370	Mipol1	exonic	443
chr12:57616290-57626762+	0	2	0	0	1	1	0	0	0	6.58545	9.5575	6.58545	6.58545	8.98942	8.79054	6.58545	6.58545	6.58545	chr12	57616289	57626762	+	12_58727749_58717277_-10472|19.48|4|11	youxintian_mouse28026	ENSMUST00000172939	Ttc6	exonic	644
chr12:57616290-57677266+	0	0	0	0	0	0	0	3	0	6.58545	6.58545	6.58545	6.58545	6.58545	6.58545	6.58545	10.2624	6.58545	chr12	57616289	57677266	+		novel	ENSMUST00000172939	Ttc6	exonic	2309
chr12:59016866-59018125+	0	2	0	0	0	0	2	0	0	6.58545	9.5575	6.58545	6.58545	6.58545	6.58545	9.74562	6.58545	6.58545	chr12	59016865	59018125	+	12_60119112_60117853_-1259|12.58|5|8	youxintian_mouse28026	NM_025656	Gemin2	exonic	264
chr12:59050268-59051708-	0	1	3	0	0	1	2	1	0	6.58545	8.73056	10.8892	6.58545	6.58545	8.79054	9.74562	8.88706	6.58545	chr12	59050267	59051708	-	12_60152695_60151255_-1440|16.65|13|32	youxintian_mouse28026	NM_030057	Trappc6b	exonic	186
chr12:64976695-64997045+	0	1	0	0	0	2	2	0	0	6.58545	8.73056	6.58545	6.58545	6.58545	9.62495	9.74562	6.58545	6.58545	chr12	64976694	64997045	+	12_66098032_66077682_-20350|17.81|14|21	youxintian_mouse28026	NM_177805	Fam179b	exonic	1615
chr12:65065737-65070052-	0	0	0	0	0	1	0	0	0	6.58545	6.58545	6.58545	6.58545	6.58545	8.79054	6.58545	6.58545	6.58545	chr12	65065736	65070052	-	12_66171039_66166724_-4315|14.08|5|5	youxintian_mouse28026	NM_013902	Fkbp3	exonic	414
chr12:65156992-65158861-	0	0	0	0	0	0	0	0	0	6.58545	6.58545	6.58545	6.58545	6.58545	6.58545	6.58545	6.58545	6.58545	chr12	65156991	65158861	-	12_66259848_66257979_-1869|17.96|3|3	youxintian_mouse28026	NM_172578	Mis18bp1	exonic	541
chr12:69320373-69322350-	2	0	0	0	2	0	0	3	0	9.98053	6.58545	6.58545	6.58545	9.84625	6.58545	6.58545	10.2624	6.58545	chr12	69320372	69322350	-	mm9_circ_016657	circBase	NM_025441	Nemf	exonic	343
chr12:69324232-69324976-	0	0	0	0	0	0	2	0	0	6.58545	6.58545	6.58545	6.58545	6.58545	6.58545	9.74562	6.58545	6.58545	chr12	69324231	69324976	-		novel	NM_025441	Nemf	exonic	238
chr12:69603476-69607412-	2	1	0	0	0	0	0	0	1	9.98053	8.73056	6.58545	6.58545	6.58545	6.58545	6.58545	6.58545	8.94889	chr12	69603475	69607412	-	12_70708399_70704463_-3936|21.62|6|7	youxintian_mouse28026	NM_001135559	Sos2	exonic	506
chr12:69823422-69825783-	0	2	0	0	0	3	0	0	0	6.58545	9.5575	6.58545	6.58545	6.58545	10.1502	6.58545	6.58545	6.58545	chr12	69823421	69825783	-	12_70926770_70924409_-2361|18.80|6|7	youxintian_mouse28026	NM_201519	Map4k5	abparts	2362
chr12:70983319-70993080+	0	0	0	0	0	0	0	0	0	6.58545	6.58545	6.58545	6.58545	6.58545	6.58545	6.58545	6.58545	6.58545	chr12	70983318	70993080	+		novel	NM_011184	Psma3	exonic	554
chr12:70990485-70993080+	0	0	0	0	1	0	0	0	0	6.58545	6.58545	6.58545	6.58545	8.98942	6.58545	6.58545	6.58545	6.58545	chr12	70990484	70993080	+		novel	NM_011184	Psma3	exonic	115
chr12:71060062-71061628+	2	0	0	0	0	0	0	0	0	9.98053	6.58545	6.58545	6.58545	6.58545	6.58545	6.58545	6.58545	6.58545	chr12	71060061	71061628	+	12_72162615_72161049_-1566|18.69|2|3	youxintian_mouse28026	NM_001081195	Arid4a	exonic	266
chr12:71074936-71076069+	0	0	2	0	0	2	0	1	0	6.58545	6.58545	10.3404	6.58545	6.58545	9.62495	6.58545	8.88706	6.58545	chr12	71074935	71076069	+	12_72177056_72175923_-1133|18.65|15|39	youxintian_mouse28026	NM_001081195	Arid4a	exonic	1134
chr12:71895727-71915788+	1	2	1	0	1	3	0	0	0	9.11153	9.5575	9.44345	6.58545	8.98942	10.1502	6.58545	6.58545	6.58545	chr12	71895726	71915788	+	12_73016775_72996714_-20061|19.72|3|3	youxintian_mouse28026	NM_026102	Daam1	exonic	310
chr12:71951194-71959912+	0	0	0	0	0	0	0	0	0	6.58545	6.58545	6.58545	6.58545	6.58545	6.58545	6.58545	6.58545	6.58545	chr12	71951193	71959912	+		novel	NM_026102	Daam1	exonic	730
chr12:72783683-72793849+	2	1	0	0	0	0	0	1	0	9.98053	8.73056	6.58545	6.58545	6.58545	6.58545	6.58545	8.88706	6.58545	chr12	72783682	72793849	+	12_73894836_73884670_-10166|20.64|7|9	youxintian_mouse28026	NM_008910	Ppm1a	sense overlapping	10167
chr12:73318977-73352173+	0	0	0	3	0	0	0	0	0	6.58545	6.58545	6.58545	10.4767	6.58545	6.58545	6.58545	6.58545	6.58545	chr12	73318976	73352173	+		novel	NM_001037717	Slc38a6	exonic	927
chr12:73545109-73545322-	0	0	0	0	0	0	2	0	0	6.58545	6.58545	6.58545	6.58545	6.58545	6.58545	9.74562	6.58545	6.58545	chr12	73545108	73545322	-		novel	NM_178715	Tmem30b	sense overlapping	214
chr12:73697917-73702912+	0	2	0	0	0	0	0	0	0	6.58545	9.5575	6.58545	6.58545	6.58545	6.58545	6.58545	6.58545	6.58545	chr12	73697916	73702912	+		novel	NM_008856	Prkch	exonic	576
chr12:73926557-73928298+	0	1	0	0	0	0	0	4	0	6.58545	8.73056	6.58545	6.58545	6.58545	6.58545	6.58545	10.649	6.58545	chr12	73926556	73928298	+	12_75029285_75027544_-1741|13.70|14|32	youxintian_mouse28026	NM_010431	Hif1a	exonic	422
chr12:73940348-73940631+	0	0	0	0	0	0	0	0	0	6.58545	6.58545	6.58545	6.58545	6.58545	6.58545	6.58545	6.58545	6.58545	chr12	73940347	73940631	+		novel	NM_010431	Hif1a	exonic	284
chr12:75485132-75515798-	0	3	0	0	0	0	0	0	0	6.58545	10.0798	6.58545	6.58545	6.58545	6.58545	6.58545	6.58545	6.58545	chr12	75485131	75515798	-	12_76616785_76586119_-30666|19.84|10|18	youxintian_mouse28026	NM_012024	Ppp2r5e	exonic	392
chr12:75493414-75515798-	0	0	0	0	0	0	0	2	0	6.58545	6.58545	6.58545	6.58545	6.58545	6.58545	6.58545	9.73278	6.58545	chr12	75493413	75515798	-		novel	NM_012024	Ppp2r5e	exonic	299
chr12:76031276-76039085+	0	1	0	4	2	2	0	0	11	6.58545	8.73056	6.58545	10.8672	9.84625	9.62495	6.58545	6.58545	12.1279	chr12	76031275	76039085	+	12_77140072_77132263_-7809|16.64|14|29	youxintian_mouse28026	NM_001005510	Syne2	exonic	821
chr12:77277361-77279032+	0	0	0	2	0	0	0	2	0	6.58545	6.58545	6.58545	9.93954	6.58545	6.58545	6.58545	9.73278	6.58545	chr12	77277360	77279032	+	12_78380019_78378348_-1671|24.99|4|6	youxintian_mouse28026	NM_001252614	Fut8	exonic	184
chr12:77277361-77332329+	1	0	0	3	2	1	2	0	1	9.11153	6.58545	6.58545	10.4767	9.84625	8.79054	9.74562	6.58545	8.94889	chr12	77277360	77332329	+	12_78433316_78378348_-54968|22.57|13|29	youxintian_mouse28026	NM_016893	Fut8	exonic	622
chr12:77277361-77365359+	0	0	0	0	0	0	0	1	1	6.58545	6.58545	6.58545	6.58545	6.58545	6.58545	6.58545	8.88706	8.94889	chr12	77277360	77365359	+	12_78466346_78378348_-87998|18.87|8|15	youxintian_mouse28026	NM_016893	Fut8	exonic	901
chr12:77323845-77332329+	3	1	3	2	0	0	0	0	1	10.519	8.73056	10.8892	9.93954	6.58545	6.58545	6.58545	6.58545	8.94889	chr12	77323844	77332329	+	12_78433316_78424832_-8484|16.35|20|179	youxintian_mouse28026	NM_016893	Fut8	exonic	527
chr12:77323845-77365359+	0	0	1	0	0	1	3	0	0	6.58545	6.58545	9.44345	6.58545	6.58545	8.79054	10.2758	6.58545	6.58545	chr12	77323844	77365359	+	12_78466346_78424832_-41514|12.65|9|21	youxintian_mouse28026	NM_016893	Fut8	exonic	806
chr12:77364969-77365359+	0	0	0	0	0	0	0	0	0	6.58545	6.58545	6.58545	6.58545	6.58545	6.58545	6.58545	6.58545	6.58545	chr12	77364968	77365359	+	12_78466346_78465956_-390|11.76|9|11	youxintian_mouse28026	NM_016893	Fut8	exonic	279
chr12:77364969-77412949+	0	0	2	0	0	0	0	0	0	6.58545	6.58545	10.3404	6.58545	6.58545	6.58545	6.58545	6.58545	6.58545	chr12	77364968	77412949	+		novel	NM_016893	Fut8	exonic	632
chr12:78504617-78590671+	0	1	2	3	0	0	0	0	0	6.58545	8.73056	10.3404	10.4767	6.58545	6.58545	6.58545	6.58545	6.58545	chr12	78504616	78590671	+	12_79691658_79605604_-86054|12.05|6|8	youxintian_mouse28026	NM_145965	Gphn	exonic	316
chr12:78562856-78637579+	0	0	0	0	2	0	0	0	0	6.58545	6.58545	6.58545	6.58545	9.84625	6.58545	6.58545	6.58545	6.58545	chr12	78562855	78637579	+	12_79738566_79663843_-74723|20.28|14|23	youxintian_mouse28026	NM_145965	Gphn	exonic	785
chr12:78794245-78797390+	2	0	0	0	0	1	0	0	0	9.98053	6.58545	6.58545	6.58545	6.58545	8.79054	6.58545	6.58545	6.58545	chr12	78794244	78797390	+	12_79898377_79895232_-3145|20.45|11|19	youxintian_mouse28026	NM_019579	Mpp5	exonic	614
chr12:78829653-78832475+	0	0	0	0	0	0	0	0	0	6.58545	6.58545	6.58545	6.58545	6.58545	6.58545	6.58545	6.58545	6.58545	chr12	78829652	78832475	+		novel	NM_019579	Mpp5	exonic	482
chr12:79263773-79264433-	0	0	0	0	0	0	0	0	2	6.58545	6.58545	6.58545	6.58545	6.58545	6.58545	6.58545	6.58545	9.80143	chr12	79263772	79264433	-	12_80365420_80364760_-660|18.25|6|8	youxintian_mouse28026	NM_001008550	Zfyve26	exonic	300
chr12:79475630-79476434+	0	0	0	0	0	0	0	0	0	6.58545	6.58545	6.58545	6.58545	6.58545	6.58545	6.58545	6.58545	6.58545	chr12	79475629	79476434	+		novel	NM_009014	Rad51b	intronic	805
chr12:79695941-79699078+	0	0	0	0	0	0	0	3	0	6.58545	6.58545	6.58545	6.58545	6.58545	6.58545	6.58545	10.2624	6.58545	chr12	79695940	79699078	+		novel	NM_009014	Rad51b	intronic	3138
chr12:80178302-80181508-	0	3	0	0	0	0	0	2	0	6.58545	10.0798	6.58545	6.58545	6.58545	6.58545	6.58545	9.73278	6.58545	chr12	80178301	80181508	-		novel	NM_134156	Actn1	exonic	299
chr12:80181361-80184899-	1	0	0	0	0	0	0	0	0	9.11153	6.58545	6.58545	6.58545	6.58545	6.58545	6.58545	6.58545	6.58545	chr12	80181360	80184899	-		novel	NM_134156	Actn1	exonic	472
chr12:80364004-80404698-	0	0	0	0	0	0	0	0	0	6.58545	6.58545	6.58545	6.58545	6.58545	6.58545	6.58545	6.58545	6.58545	chr12	80364003	80404698	-	12_81505685_81464991_-40694|13.61|4|10	youxintian_mouse28026	NM_177267	Dcaf5	exonic	732
chr12:80397653-80404698-	0	1	1	0	0	0	1	1	2	6.58545	8.73056	9.44345	6.58545	6.58545	6.58545	8.8986	8.88706	9.80143	chr12	80397652	80404698	-	12_81505685_81498640_-7045|15.33|10|28	youxintian_mouse28026	NM_177267	Dcaf5	exonic	451
chr12:81314260-81316104-	0	0	0	0	0	0	0	0	0	6.58545	6.58545	6.58545	6.58545	6.58545	6.58545	6.58545	6.58545	6.58545	chr12	81314259	81316104	-	mm9_circ_010639	circBase	NM_080440	Slc8a3	exonic	1845
chr12:81894983-81919380+	0	0	0	0	0	0	0	0	0	6.58545	6.58545	6.58545	6.58545	6.58545	6.58545	6.58545	6.58545	6.58545	chr12	81894982	81919380	+	12_83020367_82995970_-24397|20.41|2|3	youxintian_mouse28026	NM_018814	Pcnx	exonic	2167
chr12:82234463-82240860+	0	0	1	0	1	0	1	0	0	6.58545	6.58545	9.44345	6.58545	8.98942	6.58545	8.8986	6.58545	6.58545	chr12	82234462	82240860	+	mm9_circ_008255	circBase	NM_001167983	Sipa1l1	sense overlapping	6398
chr12:82234463-82288725+	0	0	0	0	0	0	0	0	0	6.58545	6.58545	6.58545	6.58545	6.58545	6.58545	6.58545	6.58545	6.58545	chr12	82234462	82288725	+		novel	NM_001167983	Sipa1l1	sense overlapping	54263
chr12:82340662-82342499+	6	8	2	5	2	12	7	5	2	11.471	11.4126	10.3404	11.1742	9.84625	12.0557	11.4328	10.9535	9.80143	chr12	82340661	82342499	+	mm9_circ_007155	circBase	NM_172579	Sipa1l1	exonic	1838
chr12:82357233-82372542+	2	0	1	0	0	3	0	0	0	9.98053	6.58545	9.44345	6.58545	6.58545	10.1502	6.58545	6.58545	6.58545	chr12	82357232	82372542	+	12_83473529_83458220_-15309|11.72|19|87	youxintian_mouse28026	NM_172579	Sipa1l1	exonic	495
chr12:82357233-82387712+	0	0	1	0	0	0	1	0	0	6.58545	6.58545	9.44345	6.58545	6.58545	6.58545	8.8986	6.58545	6.58545	chr12	82357232	82387712	+	12_83488699_83458220_-30479|14.69|11|25	youxintian_mouse28026	NM_172579	Sipa1l1	exonic	757
chr12:83574632-83575136-	4	3	1	0	1	1	1	0	0	10.9103	10.0798	9.44345	6.58545	8.98942	8.79054	8.8986	6.58545	6.58545	chr12	83574631	83575136	-	12_84916086_84915582_-504|19.27|16|35	youxintian_mouse28026	NM_183154	Zfyve1	exonic	505
chr12:83712304-83730712+	0	0	0	0	0	0	0	0	0	6.58545	6.58545	6.58545	6.58545	6.58545	6.58545	6.58545	6.58545	6.58545	chr12	83712303	83730712	+		novel	NM_008943	Psen1	exonic	1042
chr12:83831922-83876812-	3	0	0	0	0	0	0	0	0	10.519	6.58545	6.58545	6.58545	6.58545	6.58545	6.58545	6.58545	6.58545	chr12	83831921	83876812	-	12_85217762_85172872_-44890|15.77|2|2	youxintian_mouse28026	NR_073563	Numb	exonic	446
chr12:84124475-84136637+	0	0	0	0	0	1	0	1	0	6.58545	6.58545	6.58545	6.58545	6.58545	8.79054	6.58545	8.88706	6.58545	chr12	84124474	84136637	+	12_85477587_85465425_-12162|19.61|15|38	youxintian_mouse28026	NM_028821	Dnal1	exonic	490
chr12:84171460-84174423-	3	1	1	0	0	0	0	1	0	10.519	8.73056	9.44345	6.58545	6.58545	6.58545	6.58545	8.88706	6.58545	chr12	85863563	85879475	+	12_87220425_87204514_-15911|16.91|22|114	youxintian_mouse28026	NM_001081423	Ttll5	exonic	457
chr12:84296228-84308432+	0	0	1	0	1	1	2	1	0	6.58545	6.58545	9.44345	6.58545	8.98942	8.79054	9.74562	8.88706	6.58545	chr12	84296227	84308432	+	12_85649382_85637178_-12204|18.54|1|2	youxintian_mouse28026	NM_001252626	Ptgr2	exonic	912
chr12:84305926-84308432+	0	0	1	0	0	1	3	0	0	6.58545	6.58545	9.44345	6.58545	6.58545	8.79054	10.2758	6.58545	6.58545	chr12	84305925	84308432	+	12_85649382_85646876_-2506|15.62|8|8	youxintian_mouse28026	NM_029880	Ptgr2	exonic	420
chr12:84934152-84951381-	0	0	0	0	0	0	3	0	0	6.58545	6.58545	6.58545	6.58545	6.58545	6.58545	10.2758	6.58545	6.58545	chr12	84934151	84951381	-	12_86292331_86275102_-17229|17.86|16|39	youxintian_mouse28026	NM_178065	Arel1	exonic	1454
chr12:85028770-85044524+	0	0	0	0	0	0	1	0	0	6.58545	6.58545	6.58545	6.58545	6.58545	6.58545	8.8986	6.58545	6.58545	chr12	85028769	85044524	+	12_86385474_86369720_-15754|16.73|4|5	youxintian_mouse28026	NM_178363	Ylpm1	exonic	3214
chr12:85033917-85057302+	0	2	0	0	0	0	0	0	0	6.58545	9.5575	6.58545	6.58545	6.58545	6.58545	6.58545	6.58545	6.58545	chr12	85033916	85057302	+	12_86398252_86374867_-23385|13.73|1|2	youxintian_mouse28026	NM_178363	Ylpm1	exonic	1705
chr12:85049692-85050372+	0	0	0	0	0	0	0	2	0	6.58545	6.58545	6.58545	6.58545	6.58545	6.58545	6.58545	9.73278	6.58545	chr12	85049691	85050372	+	mm9_circ_017717	circBase	NM_178363	Ylpm1	exonic	345
chr12:85057222-85065101+	0	0	0	0	0	0	0	0	0	6.58545	6.58545	6.58545	6.58545	6.58545	6.58545	6.58545	6.58545	6.58545	chr12	85057221	85065101	+		novel	NM_178363	Ylpm1	exonic	264
chr12:85121987-85123871+	0	2	0	0	0	0	0	0	1	6.58545	9.5575	6.58545	6.58545	6.58545	6.58545	6.58545	6.58545	8.94889	chr12	85121986	85123871	+	12_86464821_86462937_-1884|17.43|8|9	youxintian_mouse28026	NM_030225	Dlst	exonic	328
chr12:85320714-85327499-	0	0	0	0	0	0	0	0	0	6.58545	6.58545	6.58545	6.58545	6.58545	6.58545	6.58545	6.58545	6.58545	chr12	85320713	85327499	-		novel	NM_145138	Nek9	exonic	420
chr12:85857380-85864609+	0	0	0	2	0	1	0	0	0	6.58545	6.58545	6.58545	9.93954	6.58545	8.79054	6.58545	6.58545	6.58545	chr12	85857379	85864609	+	12_87205559_87198330_-7229|12.46|2|2	youxintian_mouse28026	NM_001081423	Ttll5	exonic	238
chr12:85040573-85050372+	0	2	0	0	0	0	0	0	0	6.58545	9.5575	6.58545	6.58545	6.58545	6.58545	6.58545	6.58545	6.58545	chr12	85040572	85050372	+	12_86391322_86381523_-9799|16.43|5|5	youxintian_mouse28026	NM_178363	Ylpm1	exonic	1506
chr12:85863564-85879475+	1	2	1	0	0	0	0	0	0	9.11153	9.5575	9.44345	6.58545	6.58545	6.58545	6.58545	6.58545	6.58545	chr12	84171459	84174423	-	12_85515373_85512410_-2963|19.58|6|11	youxintian_mouse28026	NM_001163501	Elmsan1	exonic	1970
chr12:86256868-86269061+	1	0	1	0	1	0	2	0	0	9.11153	6.58545	9.44345	6.58545	8.98942	6.58545	9.74562	6.58545	6.58545	chr12	86256867	86269061	+	mm9_circ_016628	circBase	NM_027405	Gpatch2l	exonic	516
chr12:87246129-87251818-	0	0	2	0	0	0	0	0	0	6.58545	6.58545	10.3404	6.58545	6.58545	6.58545	6.58545	6.58545	6.58545	chr12	87246128	87251818	-		novel	NM_134044	Vipas39	exonic	416
chr12:87336032-87346801-	0	1	3	0	1	1	0	1	2	6.58545	8.73056	10.8892	6.58545	8.98942	8.79054	6.58545	8.88706	9.80143	chr12	87336031	87346801	-	12_88687751_88676982_-10769|19.49|4|6	youxintian_mouse28026	NM_011479	Sptlc2	exonic	547
chr12:87336032-87350385-	0	0	0	0	1	2	1	1	0	6.58545	6.58545	6.58545	6.58545	8.98942	9.62495	8.8986	8.88706	6.58545	chr12	87336031	87350385	-	12_88691335_88676982_-14353|18.20|5|6	youxintian_mouse28026	NM_011479	Sptlc2	exonic	672
chr12:87346708-87369125-	0	0	0	0	0	0	0	2	0	6.58545	6.58545	6.58545	6.58545	6.58545	6.58545	6.58545	9.73278	6.58545	chr12	87346707	87369125	-		novel	NM_011479	Sptlc2	exonic	718
chr12:91230795-91255739-	0	3	0	0	0	0	0	0	0	6.58545	10.0798	6.58545	6.58545	6.58545	6.58545	6.58545	6.58545	6.58545	chr12	91230794	91255739	-		novel	NM_181815	Cep128	exonic	402
chr12:91289489-91299077-	0	0	0	0	2	0	0	0	0	6.58545	6.58545	6.58545	6.58545	9.84625	6.58545	6.58545	6.58545	6.58545	chr12	91289488	91299077	-	12_92537517_92527929_-9588|12.77|4|6	youxintian_mouse28026	NM_181815	Cep128	exonic	447
chr12:91333251-91366504-	0	2	0	0	0	0	0	0	0	6.58545	9.5575	6.58545	6.58545	6.58545	6.58545	6.58545	6.58545	6.58545	chr12	91333250	91366504	-		novel	NM_181815	Cep128	exonic	657
chr12:98648349-98664305+	0	0	0	0	0	2	0	0	0	6.58545	6.58545	6.58545	6.58545	6.58545	9.62495	6.58545	6.58545	6.58545	chr12	98648348	98664305	+	12_99902515_99886559_-15956|15.21|2|2	youxintian_mouse28026	NM_178914	Spata7	exonic	883
chr12:98658213-98664305+	0	0	0	0	0	3	1	0	0	6.58545	6.58545	6.58545	6.58545	6.58545	10.1502	8.8986	6.58545	6.58545	chr12	98658212	98664305	+		novel	NM_178914	Spata7	exonic	749
chr12:98682519-98689628-	3	0	0	0	0	0	0	0	0	10.519	6.58545	6.58545	6.58545	6.58545	6.58545	6.58545	6.58545	6.58545	chr12	98682518	98689628	-		novel	NM_011877	Ptpn21	exonic	1799
chr12:98752778-98763978+	0	0	0	0	0	0	0	1	2	6.58545	6.58545	6.58545	6.58545	6.58545	6.58545	6.58545	8.88706	9.80143	chr12	98752777	98763978	+	12_100002188_99990988_-11200|18.46|20|35	youxintian_mouse28026	NM_029334	Zc3h14	exonic	1200
chr12:98756185-98763978+	0	0	0	0	0	0	0	0	2	6.58545	6.58545	6.58545	6.58545	6.58545	6.58545	6.58545	6.58545	9.80143	chr12	98756184	98763978	+		novel	NM_029334	Zc3h14	exonic	1085
chr12:98757009-98759879+	0	0	0	0	0	0	0	0	0	6.58545	6.58545	6.58545	6.58545	6.58545	6.58545	6.58545	6.58545	6.58545	chr12	98757008	98759879	+		novel	NM_029334	Zc3h14	exonic	787
chr12:99291237-99388917-	1	3	0	0	0	2	0	0	0	9.11153	10.0798	6.58545	6.58545	6.58545	9.62495	6.58545	6.58545	6.58545	chr12	99291236	99388917	-		novel	NM_183186	Foxn3	exonic	735
chr12:99854610-99855639-	0	2	0	0	0	1	0	0	0	6.58545	9.5575	6.58545	6.58545	6.58545	8.79054	6.58545	6.58545	6.58545	chr12	99854609	99855639	-	12_101093849_101092820_-1029|19.05|5|17	youxintian_mouse28026	NM_030172	Efcab11	exonic	193
chr12:99909679-99945348+	0	0	0	0	0	2	0	0	0	6.58545	6.58545	6.58545	6.58545	6.58545	9.62495	6.58545	6.58545	6.58545	chr12	99909678	99945348	+		novel	NM_028354	Tdp1	exonic	869
chr12:101646580-101694673-	1	1	1	3	1	2	1	0	1	9.11153	8.73056	9.44345	10.4767	8.98942	9.62495	8.8986	6.58545	8.94889	chr12	101646579	101694673	-	12_102932883_102884790_-48093|10.44|5|10	youxintian_mouse28026	NM_028924	Tc2n	sense overlapping	48094
chr12:101649131-101694673-	0	0	1	0	0	2	0	0	0	6.58545	6.58545	9.44345	6.58545	6.58545	9.62495	6.58545	6.58545	6.58545	chr12	101649130	101694673	-		novel	NM_028924	Tc2n	sense overlapping	45543
chr12:101665553-101694673-	1	2	5	4	3	1	6	2	9	9.11153	9.5575	11.5967	10.8672	10.3801	8.79054	11.2188	9.73278	11.8452	chr12	101665552	101694673	-	12_102932883_102903763_-29120|11.14|6|21	youxintian_mouse28026	NM_028924	Tc2n	exonic	746
chr12:101678514-101693206-	0	0	0	0	0	2	0	0	0	6.58545	6.58545	6.58545	6.58545	6.58545	9.62495	6.58545	6.58545	6.58545	chr12	101678513	101693206	-		novel	NM_028924	Tc2n	exonic	386
chr12:101678514-101694673-	0	1	2	3	2	3	2	0	0	6.58545	8.73056	10.3404	10.4767	9.84625	10.1502	9.74562	6.58545	6.58545	chr12	101678513	101694673	-	12_102932883_102916724_-16159|11.80|6|11	youxintian_mouse28026	NM_028924	Tc2n	exonic	554
chr12:101688960-101694673-	1	2	1	3	4	0	0	0	0	9.11153	9.5575	9.44345	10.4767	10.769	6.58545	6.58545	6.58545	6.58545	chr12	101688959	101694673	-	12_102932883_102927170_-5713|11.94|5|7	youxintian_mouse28026	NM_028924	Tc2n	exonic	437
chr12:101693115-101694673-	0	0	0	0	0	0	0	1	3	6.58545	6.58545	6.58545	6.58545	6.58545	6.58545	6.58545	8.88706	10.3337	chr12	101693114	101694673	-	12_102932883_102931325_-1558|10.64|4|20	youxintian_mouse28026	NM_028924	Tc2n	exonic	260
chr12:101862593-101890618-	0	0	0	0	0	0	0	2	0	6.58545	6.58545	6.58545	6.58545	6.58545	6.58545	6.58545	9.73278	6.58545	chr12	101862592	101890618	-	12_103128828_103100803_-28025|16.47|7|8	youxintian_mouse28026	NM_028446	Trip11	exonic	4065
chr12:101883256-101890618-	1	2	0	0	2	1	1	2	0	9.11153	9.5575	6.58545	6.58545	9.84625	8.79054	8.8986	9.73278	6.58545	chr12	101883255	101890618	-	12_103128828_103121466_-7362|19.43|16|47	youxintian_mouse28026	NM_028446	Trip11	exonic	3362
chr12:101932968-101948439-	0	0	0	0	0	0	0	0	0	6.58545	6.58545	6.58545	6.58545	6.58545	6.58545	6.58545	6.58545	6.58545	chr12	101932967	101948439	-		novel	NM_029705	Atxn3	exonic	848
chr12:101937337-101948439-	0	2	0	0	0	1	0	0	0	6.58545	9.5575	6.58545	6.58545	6.58545	8.79054	6.58545	6.58545	6.58545	chr12	101937336	101948439	-		novel	NM_029705	Atxn3	exonic	584
chr12:101945400-101948439-	0	3	0	0	0	0	0	0	0	6.58545	10.0798	6.58545	6.58545	6.58545	6.58545	6.58545	6.58545	6.58545	chr12	101945399	101948439	-		novel	NM_029705	Atxn3	exonic	363
chr12:102471998-102474773+	1	0	0	0	1	0	0	1	0	9.11153	6.58545	6.58545	6.58545	8.98942	6.58545	6.58545	8.88706	6.58545	chr12	102471997	102474773	+	12_103712983_103710208_-2775|21.20|5|5	youxintian_mouse28026	NM_013747	Golga5	exonic	796
chr12:102471998-102484574+	0	0	0	0	0	0	0	0	0	6.58545	6.58545	6.58545	6.58545	6.58545	6.58545	6.58545	6.58545	6.58545	chr12	102471997	102484574	+	12_103722784_103710208_-12576|22.27|3|6	youxintian_mouse28026	NM_013747	Golga5	exonic	1515
chr12:102584287-102606206-	0	0	0	0	0	0	0	0	0	6.58545	6.58545	6.58545	6.58545	6.58545	6.58545	6.58545	6.58545	6.58545	chr12	102584286	102606206	-		novel	NM_172584	Itpk1	exonic	424
chr12:102606089-102623425-	0	0	0	0	0	0	0	0	0	6.58545	6.58545	6.58545	6.58545	6.58545	6.58545	6.58545	6.58545	6.58545	chr12	102606088	102623425	-	12_103861635_103844299_-17336|20.71|2|2	youxintian_mouse28026	NM_172584	Itpk1	exonic	244
chr12:102807900-102812843-	0	3	0	0	0	0	1	1	0	6.58545	10.0798	6.58545	6.58545	6.58545	6.58545	8.8986	8.88706	6.58545	chr12	102807899	102812843	-	12_104051053_104046110_-4943|18.78|13|34	youxintian_mouse28026	NM_172806	Btbd7	exonic	446
chr12:102831859-102832058-	0	0	0	0	2	0	0	0	0	6.58545	6.58545	6.58545	6.58545	9.84625	6.58545	6.58545	6.58545	6.58545	chr12	102831858	102832058	-		novel	ENSMUST00000045652	Btbd7	intronic	200
chr12:104721971-104724125-	0	0	0	0	0	0	0	0	2	6.58545	6.58545	6.58545	6.58545	6.58545	6.58545	6.58545	6.58545	9.80143	chr12	104721970	104724125	-		novel	NM_148948	Dicer1	sense overlapping	2155
chr12:105648313-105651523-	0	1	0	0	2	0	0	0	0	6.58545	8.73056	6.58545	6.58545	9.84625	6.58545	6.58545	6.58545	6.58545	chr12	105648312	105651523	-	12_106889733_106886523_-3210|17.73|10|17	youxintian_mouse28026	NM_029654	Atg2b	exonic	625
chr12:105799651-105820450+	0	1	0	0	0	1	0	1	0	6.58545	8.73056	6.58545	6.58545	6.58545	8.79054	6.58545	8.88706	6.58545	chr12	105799650	105820450	+	12_107058660_107037861_-20799|17.68|8|9	youxintian_mouse28026	NM_011112	Papola	exonic	1391
chr12:105799651-105823677+	0	0	1	0	0	0	0	0	3	6.58545	6.58545	9.44345	6.58545	6.58545	6.58545	6.58545	6.58545	10.3337	chr12	105799650	105823677	+	12_107061887_107037861_-24026|18.10|4|4	youxintian_mouse28026	NM_011112	Papola	exonic	1513
chr12:105799651-105837049+	0	0	0	0	3	0	0	0	0	6.58545	6.58545	6.58545	6.58545	10.3801	6.58545	6.58545	6.58545	6.58545	chr12	105799650	105837049	+	12_107075259_107037861_-37398|15.90|2|2	youxintian_mouse28026	ENSMUST00000021535	Papola	exonic	2401
chr12:107989465-107989827-	0	0	0	0	0	2	0	0	0	6.58545	6.58545	6.58545	6.58545	6.58545	9.62495	6.58545	6.58545	6.58545	chr12	107989464	107989827	-		novel	ENSMUST00000109887	Bcl11b	intronic	363
chr12:108157754-108165172-	0	8	0	1	6	8	1	6	3	6.58545	11.4126	6.58545	9.07415	11.3272	11.487	8.8986	11.2049	10.3337	chr12	108157753	108165172	-		novel	NM_028262	Setd3	exonic	682
chr12:109718114-109718499+	0	1	0	0	0	0	2	0	0	6.58545	8.73056	6.58545	6.58545	6.58545	6.58545	9.74562	6.58545	6.58545	chr12	109718113	109718499	+	mm9_circ_016120	circBase			intergenic	386
chr12:109734563-109742290+	0	0	0	0	0	1	0	2	0	6.58545	6.58545	6.58545	6.58545	6.58545	8.79054	6.58545	9.73278	6.58545	chr12	109734562	109742290	+	mm9_circ_017546	circBase	uc007pbd.2	Mirg	exonic	849
chr12:110544075-110554896+	0	0	0	0	5	0	0	1	0	6.58545	6.58545	6.58545	6.58545	11.0749	6.58545	6.58545	8.88706	6.58545	chr12	110544074	110554896	+	12_111793106_111782285_-10821|11.75|11|18	youxintian_mouse28026	NM_012023	Ppp2r5c	exonic	558
chr12:110545595-110561468+	0	0	0	0	0	0	0	0	2	6.58545	6.58545	6.58545	6.58545	6.58545	6.58545	6.58545	6.58545	9.80143	chr12	110545594	110561468	+	12_111799678_111783805_-15873|17.81|8|11	youxintian_mouse28026	NM_012023	Ppp2r5c	exonic	618
chr12:110651491-110652194+	0	1	0	0	0	1	1	0	0	6.58545	8.73056	6.58545	6.58545	6.58545	8.79054	8.8986	6.58545	6.58545	chr12	110651490	110652194	+	12_111890404_111889701_-703|17.49|10|13	youxintian_mouse28026	NM_030238	Dync1h1	exonic	415
chr12:110655560-110665205+	0	0	0	2	0	0	0	0	0	6.58545	6.58545	6.58545	9.93954	6.58545	6.58545	6.58545	6.58545	6.58545	chr12	110655559	110665205	+		novel	NM_030238	Dync1h1	sense overlapping	9646
chr12:110932617-110938364+	0	2	0	0	0	0	0	0	0	6.58545	9.5575	6.58545	6.58545	6.58545	6.58545	6.58545	6.58545	6.58545	chr12	110932616	110938364	+		novel	NM_175336	Tecpr2	exonic	1374
chr12:110970419-110971062+	0	0	0	0	2	0	0	0	0	6.58545	6.58545	6.58545	6.58545	9.84625	6.58545	6.58545	6.58545	6.58545	chr12	110970418	110971062	+		novel	NM_175336	Tecpr2	sense overlapping	644
chr12:111219811-111222397+	0	0	0	1	0	0	0	1	0	6.58545	6.58545	6.58545	9.07415	6.58545	6.58545	6.58545	8.88706	6.58545	chr12	111219810	111222397	+	12_112460608_112458022_-2586|15.04|5|6	youxintian_mouse28026	ENSMUST00000117269	Traf3	intronic	2587
chr12:111219811-111243538+	0	0	0	0	0	0	2	0	0	6.58545	6.58545	6.58545	6.58545	6.58545	6.58545	9.74562	6.58545	6.58545	chr12	111219810	111243538	+	12_112481749_112458022_-23727|17.44|12|23	youxintian_mouse28026	NM_011632	Traf3	exonic	695
chr12:111592577-111604564+	3	0	0	0	0	1	0	0	2	10.519	6.58545	6.58545	6.58545	6.58545	8.79054	6.58545	6.58545	9.80143	chr12	111592576	111604564	+	mm9_circ_000427	circBase	NM_021516	Mark3	exonic	246
chr12:111592577-111618383+	0	1	0	0	0	1	3	1	0	6.58545	8.73056	6.58545	6.58545	6.58545	8.79054	10.2758	8.88706	6.58545	chr12	111592576	111618383	+	mm9_circ_011801	circBase	NM_021516	Mark3	exonic	361
chr12:111633617-111640040+	2	0	0	0	0	0	1	0	0	9.98053	6.58545	6.58545	6.58545	6.58545	6.58545	8.8986	6.58545	6.58545	chr12	111633616	111640040	+	12_112878251_112871828_-6423|10.29|13|18	youxintian_mouse28026	NM_021516	Mark3	exonic	322
chr12:111775924-111778700+	1	0	0	0	0	0	0	0	2	9.11153	6.58545	6.58545	6.58545	6.58545	6.58545	6.58545	6.58545	9.80143	chr12	111775923	111778700	+		novel	NM_008450	Klc1	exonic	495
chr12:111778020-111789459+	3	0	0	0	0	2	0	0	0	10.519	6.58545	6.58545	6.58545	6.58545	9.62495	6.58545	6.58545	6.58545	chr12	111778019	111789459	+	12_113027670_113016231_-11439|17.74|15|38	youxintian_mouse28026	NM_008450	Klc1	exonic	826
chr12:111778020-111789486+	0	1	0	0	0	0	0	0	0	6.58545	8.73056	6.58545	6.58545	6.58545	6.58545	6.58545	6.58545	6.58545	chr12	111778019	111789486	+	12_113027697_113016231_-11466|19.42|6|10	youxintian_mouse28026	NM_001025359	Klc1	exonic	853
chr12:111858210-111872433-	0	1	0	0	0	2	1	3	0	6.58545	8.73056	6.58545	6.58545	6.58545	9.62495	8.8986	10.2624	6.58545	chr12	111858209	111872433	-	mm9_circ_012091	circBase	NM_011625	Ppp1r13b	exonic	345
chr12:113044226-113056967+	0	0	0	0	0	0	0	0	0	6.58545	6.58545	6.58545	6.58545	6.58545	6.58545	6.58545	6.58545	6.58545	chr12	113044225	113056967	+		novel	NM_001081170	Pacs2	exonic	840
chr12:116317830-116324210+	3	3	0	4	4	3	1	2	5	10.519	10.0798	6.58545	10.8672	10.769	10.1502	8.8986	9.73278	11.0271	chr12	116317829	116324210	+	mm9_circ_015704	circBase	NM_028731	Esyt2	exonic	417
chr12:116346504-116357934+	0	0	0	2	0	0	0	0	0	6.58545	6.58545	6.58545	9.93954	6.58545	6.58545	6.58545	6.58545	6.58545	chr12	116346503	116357934	+	12_117596407_117584977_-11430|16.43|16|62	youxintian_mouse28026	NM_028731	Esyt2	exonic	397
chr13:3556314-3557057+	0	0	0	0	2	1	0	1	1	6.58545	6.58545	6.58545	6.58545	9.84625	8.79054	6.58545	8.88706	8.94889	chr13	3556313	3557057	+	13_3556303_3555560_-743|13.83|20|62	youxintian_mouse28026	NM_008112	Gdi2	exonic	331
chr13:3573487-3600334-	0	0	0	2	0	0	0	0	0	6.58545	6.58545	6.58545	9.93954	6.58545	6.58545	6.58545	6.58545	6.58545	chr13	3573486	3600334	-		novel	NM_134063	Fam208b	exonic	6703
chr13:3598396-3598575-	0	2	0	0	0	0	0	0	0	6.58545	9.5575	6.58545	6.58545	6.58545	6.58545	6.58545	6.58545	6.58545	chr13	3598395	3598575	-		novel	ENSMUST00000096069	BC016423	intronic	180
chr13:8835297-8849669-	0	0	0	0	0	2	0	0	0	6.58545	6.58545	6.58545	6.58545	6.58545	9.62495	6.58545	6.58545	6.58545	chr13	8835296	8849669	-	13_8848915_8834543_-14372|16.36|15|18	youxintian_mouse28026	NM_172445	Wdr37	exonic	713
chr13:8835297-8861265-	0	0	0	0	0	2	0	0	0	6.58545	6.58545	6.58545	6.58545	6.58545	9.62495	6.58545	6.58545	6.58545	chr13	8835296	8861265	-	13_8860511_8834543_-25968|12.70|12|17	youxintian_mouse28026	NM_172445	Wdr37	exonic	1149
chr13:8836783-8861265-	0	0	2	0	0	0	1	0	0	6.58545	6.58545	10.3404	6.58545	6.58545	6.58545	8.8986	6.58545	6.58545	chr13	8836782	8861265	-	13_8860511_8836029_-24482|13.98|4|4	youxintian_mouse28026	NM_172445	Wdr37	exonic	1007
chr13:9122108-9137301+	0	0	0	0	0	0	0	0	0	6.58545	6.58545	6.58545	6.58545	6.58545	6.58545	6.58545	6.58545	6.58545	chr13	9122107	9137301	+	13_9136547_9121354_-15193|19.45|11|15	youxintian_mouse28026	NM_172585	Larp4b	exonic	474
chr13:9122108-9147504+	0	0	0	0	3	0	0	0	0	6.58545	6.58545	6.58545	6.58545	10.3801	6.58545	6.58545	6.58545	6.58545	chr13	9122107	9147504	+	13_9146750_9121354_-25396|20.13|2|2	youxintian_mouse28026	NM_172585	Larp4b	exonic	794
chr13:9122108-9151224+	0	0	0	0	0	0	2	0	0	6.58545	6.58545	6.58545	6.58545	6.58545	6.58545	9.74562	6.58545	6.58545	chr13	9122107	9151224	+	13_9150470_9121354_-29116|19.03|14|29	youxintian_mouse28026	NM_172585	Larp4b	exonic	1169
chr13:9136779-9151224+	0	0	0	0	0	0	2	0	0	6.58545	6.58545	6.58545	6.58545	6.58545	6.58545	9.74562	6.58545	6.58545	chr13	9136778	9151224	+	13_9150470_9136025_-14445|19.28|8|16	youxintian_mouse28026	NM_172585	Larp4b	exonic	990
chr13:9710146-9735466-	0	0	0	0	2	0	0	0	1	6.58545	6.58545	6.58545	6.58545	9.84625	6.58545	6.58545	6.58545	8.94889	chr13	9710145	9735466	-	13_9734712_9709392_-25320|15.96|22|136	youxintian_mouse28026	NM_001199141	Zmynd11	exonic	457
chr13:9720773-9735466-	1	0	0	0	1	2	0	0	1	9.11153	6.58545	6.58545	6.58545	8.98942	9.62495	6.58545	6.58545	8.94889	chr13	9720772	9735466	-	mm9_circ_001794	circBase	NM_144516	Zmynd11	exonic	295
chr13:12408654-12418229+	0	0	0	0	0	0	0	0	0	6.58545	6.58545	6.58545	6.58545	6.58545	6.58545	6.58545	6.58545	6.58545	chr13	12408653	12418229	+		novel	NM_144835	Heatr1	exonic	1929
chr13:12454735-12459316-	0	4	1	0	0	1	2	2	0	6.58545	10.4625	9.44345	6.58545	6.58545	8.79054	9.74562	9.73278	6.58545	chr13	12454734	12459316	-	13_12551583_12547002_-4581|15.88|14|16	youxintian_mouse28026	NM_018886	Lgals8	exonic	443
chr13:14019702-14040323-	0	2	0	0	0	0	0	0	0	6.58545	9.5575	6.58545	6.58545	6.58545	6.58545	6.58545	6.58545	6.58545	chr13	14019701	14040323	-		novel	NM_178337	Tbce	sense overlapping	20622
chr13:14076785-14079684+	0	0	0	0	0	0	0	2	0	6.58545	6.58545	6.58545	6.58545	6.58545	6.58545	6.58545	9.73278	6.58545	chr13	14076784	14079684	+		novel	ENSMUST00000039538	Arid4b	intronic	2900
chr13:14126451-14132515+	0	1	0	0	0	2	0	0	0	6.58545	8.73056	6.58545	6.58545	6.58545	9.62495	6.58545	6.58545	6.58545	chr13	14126450	14132515	+	13_14224782_14218718_-6064|18.05|9|12	youxintian_mouse28026	NM_194262	Arid4b	exonic	237
chr13:17738917-17772957-	0	0	1	0	0	1	1	0	0	6.58545	6.58545	9.44345	6.58545	6.58545	8.79054	8.8986	6.58545	6.58545	chr13	17738916	17772957	-	mm9_circ_008656	circBase	NM_027118	Cdk13	exonic	1566
chr13:17750257-17765093-	0	0	0	0	0	0	0	0	1	6.58545	6.58545	6.58545	6.58545	6.58545	6.58545	6.58545	6.58545	8.94889	chr13	17750256	17765093	-	13_17856927_17842091_-14836|12.37|9|22	youxintian_mouse28026	NM_027118	Cdk13	exonic	558
chr13:17750257-17772957-	0	0	0	0	0	4	1	1	0	6.58545	6.58545	6.58545	6.58545	6.58545	10.5344	8.8986	8.88706	6.58545	chr13	17750256	17772957	-	mm9_circ_005864	circBase	NM_027118	Cdk13	exonic	1386
chr13:17763104-17772957-	2	3	0	2	0	4	2	2	6	9.98053	10.0798	6.58545	9.93954	6.58545	10.5344	9.74562	9.73278	11.279	chr13	17763103	17772957	-	mm9_circ_016768	circBase	NM_027118	Cdk13	exonic	1139
chr13:18782647-18814293+	2	0	0	0	0	0	0	0	0	9.98053	6.58545	6.58545	6.58545	6.58545	6.58545	6.58545	6.58545	6.58545	chr13	18782646	18814293	+	mm9_circ_010099	circBase	NM_172120	Vps41	exonic	538
chr13:18810432-18814293+	2	1	0	0	1	2	2	0	0	9.98053	8.73056	6.58545	6.58545	8.98942	9.62495	9.74562	6.58545	6.58545	chr13	18810431	18814293	+	mm9_circ_008691	circBase	NM_172120	Vps41	exonic	334
chr13:24064577-24094570-	0	1	0	0	0	1	0	0	0	6.58545	8.73056	6.58545	6.58545	6.58545	8.79054	6.58545	6.58545	6.58545	chr13	24064576	24094570	-	13_24186439_24156446_-29993|15.10|4|4	youxintian_mouse28026	NM_026825	Lrrc16a	exonic	1110
chr13:24106309-24141731-	0	0	0	0	0	0	0	0	2	6.58545	6.58545	6.58545	6.58545	6.58545	6.58545	6.58545	6.58545	9.80143	chr13	24106308	24141731	-		novel	NM_026825	Lrrc16a	exonic	781
chr13:24673032-24677873+	0	0	0	0	0	0	0	0	0	6.58545	6.58545	6.58545	6.58545	6.58545	6.58545	6.58545	6.58545	6.58545	chr13	24673031	24677873	+		novel	NM_029679	Fam65b	exonic	307
chr13:29424143-29424439-	0	0	2	0	0	0	0	0	0	6.58545	6.58545	10.3404	6.58545	6.58545	6.58545	6.58545	6.58545	6.58545	chr13	29424142	29424439	-		novel	ENSMUST00000006353	Cdkal1	intronic	297
chr13:29517413-29552395-	0	0	0	0	1	0	0	0	3	6.58545	6.58545	6.58545	6.58545	8.98942	6.58545	6.58545	6.58545	10.3337	chr13	29517412	29552395	-	13_29644264_29609282_-34982|19.77|7|14	youxintian_mouse28026	NM_144536	Cdkal1	exonic	313
chr13:29846228-29850108-	0	0	0	0	1	0	0	0	0	6.58545	6.58545	6.58545	6.58545	8.98942	6.58545	6.58545	6.58545	6.58545	chr13	29846227	29850108	-	13_29941977_29938097_-3880|13.81|6|8	youxintian_mouse28026	NM_144536	Cdkal1	exonic	283
chr13:30194536-30202420+	0	0	0	0	1	0	0	0	3	6.58545	6.58545	6.58545	6.58545	8.98942	6.58545	6.58545	6.58545	10.3337	chr13	30194535	30202420	+	13_30294289_30286405_-7884|21.74|2|2	youxintian_mouse28026	NM_153546	Mboat1	exonic	320
chr13:30194536-30238095+	0	0	0	0	2	0	0	0	0	6.58545	6.58545	6.58545	6.58545	9.84625	6.58545	6.58545	6.58545	6.58545	chr13	30194535	30238095	+		novel	NM_153546	Mboat1	exonic	1110
chr13:30856654-30911250-	0	0	0	0	2	0	0	0	0	6.58545	6.58545	6.58545	6.58545	9.84625	6.58545	6.58545	6.58545	6.58545	chr13	30856653	30911250	-	13_31003119_30948523_-54596|17.41|2|3	youxintian_mouse28026	NM_025588	Exoc2	exonic	1719
chr13:31971105-31993376-	0	0	0	0	0	2	0	0	0	6.58545	6.58545	6.58545	6.58545	6.58545	9.62495	6.58545	6.58545	6.58545	chr13	31971104	31993376	-		novel	ENSMUST00000041859	Gmds	intronic	22272
chr13:32100357-32145159-	0	0	2	0	0	0	0	0	0	6.58545	6.58545	10.3404	6.58545	6.58545	6.58545	6.58545	6.58545	6.58545	chr13	32100356	32145159	-		novel	NM_146041	Gmds	sense overlapping	44803
chr13:32225135-32227302-	2	3	0	1	0	5	5	3	0	9.98053	10.0798	6.58545	9.07415	6.58545	10.8376	10.9673	10.2624	6.58545	chr13	32225134	32227302	-	13_32319171_32317004_-2167|14.63|13|18	youxintian_mouse28026	NM_146041	Gmds	exonic	198
chr13:32225135-32234397-	7	5	1	1	4	9	2	5	9	11.6864	10.7647	9.44345	9.07415	10.769	11.6515	9.74562	10.9535	11.8452	chr13	32225134	32234397	-	13_32326266_32317004_-9262|20.55|16|75	youxintian_mouse28026	NM_146041	Gmds	exonic	243
chr13:32225135-32276872-	3	0	0	0	0	0	0	0	2	10.519	6.58545	6.58545	6.58545	6.58545	6.58545	6.58545	6.58545	9.80143	chr13	32225134	32276872	-	13_32368741_32317004_-51737|17.53|2|2	youxintian_mouse28026	NM_146041	Gmds	sense overlapping	51738
chr13:34215831-34216017-	0	0	0	0	0	2	0	0	0	6.58545	6.58545	6.58545	6.58545	6.58545	9.62495	6.58545	6.58545	6.58545	chr13	34215830	34216017	-		novel	ENSMUST00000040336	Slc22a23	intronic	187
chr13:35815909-35816575+	4	3	1	0	0	0	5	2	2	10.9103	10.0798	9.44345	6.58545	6.58545	6.58545	10.9673	9.73278	9.80143	chr13	35815908	35816575	+	mm9_circ_003780	circBase	NM_009881	Cdyl	exonic	667
chr13:36877743-36918635-	0	0	0	0	0	0	0	0	0	6.58545	6.58545	6.58545	6.58545	6.58545	6.58545	6.58545	6.58545	6.58545	chr13	36877742	36918635	-	13_37010504_36969612_-40892|15.86|5|5	youxintian_mouse28026	NM_028784	F13a1	exonic	933
chr13:37888871-37899787+	2	6	2	1	1	3	1	6	4	9.98053	11.0144	10.3404	9.07415	8.98942	10.1502	8.8986	11.2049	10.7216	chr13	37888870	37899787	+	mm9_circ_011756	circBase	NM_026830	Rreb1	exonic	676
chr13:37888871-37916595+	0	3	0	0	0	0	0	0	0	6.58545	10.0798	6.58545	6.58545	6.58545	6.58545	6.58545	6.58545	6.58545	chr13	37888870	37916595	+	13_38008464_37980740_-27724|20.42|3|3	youxintian_mouse28026	NM_026830	Rreb1	exonic	952
chr13:37928123-37932489+	0	2	0	0	0	0	0	0	0	6.58545	9.5575	6.58545	6.58545	6.58545	6.58545	6.58545	6.58545	6.58545	chr13	37928122	37932489	+		novel	NR_033218	Rreb1	exonic	3122
chr13:38045273-38050310+	0	0	0	0	1	0	0	2	0	6.58545	6.58545	6.58545	6.58545	8.98942	6.58545	6.58545	9.73278	6.58545	chr13	38045272	38050310	+		novel	NM_024242	Riok1	exonic	417
chr13:38220688-38221393+	0	0	0	0	0	0	0	2	0	6.58545	6.58545	6.58545	6.58545	6.58545	6.58545	6.58545	9.73278	6.58545	chr13	38220687	38221393	+	13_38313262_38312557_-705|18.78|4|4	youxintian_mouse28026	NM_026382	Snrnp48	exonic	248
chr13:38954109-38955936-	0	2	0	0	0	0	0	0	1	6.58545	9.5575	6.58545	6.58545	6.58545	6.58545	6.58545	6.58545	8.94889	chr13	38954108	38955936	-	13_39047805_39045978_-1827|19.81|8|13	youxintian_mouse28026	NM_134060	Slc35b3	exonic	410
chr13:38997560-39006828+	0	0	0	0	0	0	3	0	0	6.58545	6.58545	6.58545	6.58545	6.58545	6.58545	10.2758	6.58545	6.58545	chr13	38997559	39006828	+		novel			intergenic	9269
chr13:40917303-40918801+	0	0	0	0	0	0	0	0	0	6.58545	6.58545	6.58545	6.58545	6.58545	6.58545	6.58545	6.58545	6.58545	chr13	40917302	40918801	+		novel	ENSMUST00000069958	Gcnt2	intronic	1499
chr13:41322511-41322695-	0	0	0	0	0	0	0	2	0	6.58545	6.58545	6.58545	6.58545	6.58545	6.58545	6.58545	9.73278	6.58545	chr13	41322510	41322695	-		novel	ENSMUST00000021794	Nedd9	intronic	185
chr13:43412411-43425214-	0	0	0	1	0	0	1	0	0	6.58545	6.58545	6.58545	9.07415	6.58545	6.58545	8.8986	6.58545	6.58545	chr13	43412410	43425214	-	13_43520583_43507780_-12803|16.22|12|19	youxintian_mouse28026	NM_019930	Ranbp9	exonic	1017
chr13:44823380-44874452+	0	0	0	0	0	0	0	0	0	6.58545	6.58545	6.58545	6.58545	6.58545	6.58545	6.58545	6.58545	6.58545	chr13	44823379	44874452	+	13_44969821_44918749_-51072|17.54|3|3	youxintian_mouse28026	NM_021878	Jarid2	exonic	448
chr13:45697821-45795637-	0	0	0	0	0	0	2	0	0	6.58545	6.58545	6.58545	6.58545	6.58545	6.58545	9.74562	6.58545	6.58545	chr13	45697820	45795637	-	13_45891006_45793190_-97816|14.96|13|60	youxintian_mouse28026	NM_009124	Atxn1	exonic	318
chr13:45795509-45852456-	0	1	0	0	0	0	0	3	0	6.58545	8.73056	6.58545	6.58545	6.58545	6.58545	6.58545	10.2624	6.58545	chr13	45795508	45852456	-	13_45947825_45890878_-56947|17.00|10|28	youxintian_mouse28026	NM_009124	Atxn1	exonic	258
chr13:45918888-45956575-	0	1	0	0	0	0	0	0	0	6.58545	8.73056	6.58545	6.58545	6.58545	6.58545	6.58545	6.58545	6.58545	chr13	45918887	45956575	-		novel	NM_009124	Atxn1	sense overlapping	37688
chr13:46699649-46701738-	0	0	0	0	0	0	0	0	0	6.58545	6.58545	6.58545	6.58545	6.58545	6.58545	6.58545	6.58545	6.58545	chr13	46699648	46701738	-		novel	NM_175749	Nup153	exonic	319
chr13:48885273-48885878-	0	2	0	1	2	3	0	0	0	6.58545	9.5575	6.58545	9.07415	9.84625	10.1502	6.58545	6.58545	6.58545	chr13	48885272	48885878	-	13_48981247_48980642_-605|18.30|12|20	youxintian_mouse28026	NM_001033268	Fam120a	exonic	239
chr13:48889124-48914949-	0	2	0	0	0	0	0	0	0	6.58545	9.5575	6.58545	6.58545	6.58545	6.58545	6.58545	6.58545	6.58545	chr13	48889123	48914949	-		novel	NM_001033268	Fam120a	exonic	1388
chr13:48921682-48934078-	0	0	0	0	2	0	0	0	0	6.58545	6.58545	6.58545	6.58545	9.84625	6.58545	6.58545	6.58545	6.58545	chr13	48921681	48934078	-	13_49029447_49017051_-12396|18.66|5|9	youxintian_mouse28026	NM_001033268	Fam120a	exonic	608
chr13:48932297-48934078-	0	0	1	1	0	4	1	1	2	6.58545	6.58545	9.44345	9.07415	6.58545	10.5344	8.8986	8.88706	9.80143	chr13	48932296	48934078	-	mm9_circ_017352	circBase	NM_001033268	Fam120a	exonic	226
chr13:49094749-49094915-	0	0	0	0	0	0	0	0	0	6.58545	6.58545	6.58545	6.58545	6.58545	6.58545	6.58545	6.58545	6.58545	chr13	49094748	49094915	-		novel	ENSMUST00000035538	Wnk2	intronic	167
chr13:49094756-49094922-	0	0	0	0	0	0	0	0	0	6.58545	6.58545	6.58545	6.58545	6.58545	6.58545	6.58545	6.58545	6.58545	chr13	49094755	49094922	-		novel	ENSMUST00000035538	Wnk2	intronic	167
chr13:52610796-52612455+	0	0	0	0	0	1	0	0	0	6.58545	6.58545	6.58545	6.58545	6.58545	8.79054	6.58545	6.58545	6.58545	chr13	52610795	52612455	+		novel	NM_011518	Syk	exonic	618
chr13:52887241-52898736-	0	0	0	1	0	0	0	0	0	6.58545	6.58545	6.58545	9.07415	6.58545	6.58545	6.58545	6.58545	6.58545	chr13	52887240	52898736	-	13_52994105_52982610_-11495|13.71|10|21	youxintian_mouse28026	NM_016709	Auh	exonic	237
chr13:54598748-54599111-	0	0	0	0	2	0	0	0	0	6.58545	6.58545	6.58545	6.58545	9.84625	6.58545	6.58545	6.58545	6.58545	chr13	54598747	54599111	-		novel	NM_028870	Cltb	sense overlapping	364
chr13:54727910-54731452+	5	7	1	0	0	4	1	2	2	11.2177	11.2272	9.44345	6.58545	6.58545	10.5344	8.8986	9.73278	9.80143	chr13	54727909	54731452	+		novel	NM_001033364	Cdhr2	exonic	380
chr13:55034889-55069807-	2	1	0	1	0	2	0	0	0	9.98053	8.73056	6.58545	9.07415	6.58545	9.62495	6.58545	6.58545	6.58545	chr13	55034888	55069807	-	13_55171168_55136250_-34918|20.05|13|44	youxintian_mouse28026	NM_011307	Uimc1	exonic	678
chr13:55055975-55069807-	1	1	0	3	2	1	0	1	1	9.11153	8.73056	6.58545	10.4767	9.84625	8.79054	6.58545	8.88706	8.94889	chr13	55055974	55069807	-	mm9_circ_013780	circBase	NM_011307	Uimc1	exonic	267
chr13:55055975-55093281-	0	0	0	0	0	0	2	0	0	6.58545	6.58545	6.58545	6.58545	6.58545	6.58545	9.74562	6.58545	6.58545	chr13	55055974	55093281	-		novel	NM_011307	Uimc1	exonic	1475
chr13:55233895-55248077+	0	0	0	0	4	7	2	2	1	6.58545	6.58545	6.58545	6.58545	10.769	11.3012	9.74562	9.73278	8.94889	chr13	103319021	103331379	+		youxintian_mouse28026	NM_025909	Oma1	exonic	1222
chr13:55233895-55282782+	1	0	0	0	0	0	0	0	0	9.11153	6.58545	6.58545	6.58545	6.58545	6.58545	6.58545	6.58545	6.58545	chr13	55233894	55282782	+	13_55384143_55335256_-48887|16.22|10|20	youxintian_mouse28026	NM_008739	Nsd1	exonic	3838
chr13:55245518-55248077+	0	1	0	0	0	0	1	0	0	6.58545	8.73056	6.58545	6.58545	6.58545	6.58545	8.8986	6.58545	6.58545	chr13	55245517	55248077	+	13_55349438_55346879_-2559|17.18|15|32	youxintian_mouse28026	NM_008739	Nsd1	exonic	2560
chr13:55291131-55298676+	0	0	0	0	0	0	2	0	1	6.58545	6.58545	6.58545	6.58545	6.58545	6.58545	9.74562	6.58545	8.94889	chr13	55291130	55298676	+	13_55400037_55392492_-7545|16.11|4|5	youxintian_mouse28026	NM_008739	Nsd1	exonic	656
chr13:55652044-55663941+	0	0	0	0	0	0	0	0	0	6.58545	6.58545	6.58545	6.58545	6.58545	6.58545	6.58545	6.58545	6.58545	chr13	55652043	55663941	+		novel	NM_001282055	Ddx46	exonic	1189
chr13:56083120-56084285-	0	0	2	0	0	0	0	0	0	6.58545	6.58545	10.3404	6.58545	6.58545	6.58545	6.58545	6.58545	6.58545	chr13	56083119	56084285	-		novel	NM_012015	H2afy	exonic	265
chr13:58177851-58199070-	0	2	0	0	0	0	1	0	0	6.58545	9.5575	6.58545	6.58545	6.58545	6.58545	8.8986	6.58545	6.58545	chr13	58177850	58199070	-		novel	NM_026842	Ubqln1	sense overlapping	21220
chr13:58191722-58199070-	0	1	1	0	1	1	4	0	1	6.58545	8.73056	9.44345	6.58545	8.98942	8.79054	10.6626	6.58545	8.94889	chr13	58191721	58199070	-	13_58300431_58293083_-7348|15.89|23|172	youxintian_mouse28026	NM_026842	Ubqln1	exonic	934
chr13:59473688-59504310-	0	0	0	0	2	0	0	0	0	6.58545	6.58545	6.58545	6.58545	9.84625	6.58545	6.58545	6.58545	6.58545	chr13	59473687	59504310	-		novel	NM_023328	Agtpbp1	exonic	1824
chr13:59495333-59508056-	0	0	0	0	0	0	0	1	0	6.58545	6.58545	6.58545	6.58545	6.58545	6.58545	6.58545	8.88706	6.58545	chr13	59495332	59508056	-	13_59609417_59596694_-12723|15.15|12|22	youxintian_mouse28026	NM_023328	Agtpbp1	exonic	1224
chr13:59607246-59618026+	2	0	0	0	0	0	1	0	0	9.98053	6.58545	6.58545	6.58545	6.58545	6.58545	8.8986	6.58545	6.58545	chr13	59607245	59618026	+	13_59719387_59708607_-10780|18.50|6|8	youxintian_mouse28026	NM_030153	Naa35	exonic	707
chr13:59640120-59642387-	0	0	0	0	2	0	0	0	0	6.58545	6.58545	6.58545	6.58545	9.84625	6.58545	6.58545	6.58545	6.58545	chr13	59640119	59642387	-		novel	NM_027307	Golm1	exonic	367
chr13:59798998-59800716-	0	0	0	0	2	0	0	0	0	6.58545	6.58545	6.58545	6.58545	9.84625	6.58545	6.58545	6.58545	6.58545	chr13	59798997	59800716	-		novel	NM_153538	Zcchc6	exonic	1227
chr13:63015026-63015963+	0	0	0	0	0	1	0	2	0	6.58545	6.58545	6.58545	6.58545	6.58545	8.79054	6.58545	9.73278	6.58545	chr13	63015025	63015963	+	13_63117323_63116386_-937|19.01|5|7	youxintian_mouse28026	NM_001289924	2010111I01Rik	exonic	938
chr13:63061035-63068285+	2	1	0	1	0	0	0	0	0	9.98053	8.73056	6.58545	9.07415	6.58545	6.58545	6.58545	6.58545	6.58545	chr13	63061034	63068285	+	mm9_circ_008943	circBase	NM_001289924	2010111I01Rik	exonic	406
chr13:63282142-63298856+	0	0	0	0	0	0	0	0	3	6.58545	6.58545	6.58545	6.58545	6.58545	6.58545	6.58545	6.58545	10.3337	chr13	63282141	63298856	+	13_63400164_63383450_-16714|17.57|2|3	youxintian_mouse28026	NR_110520	2010111I01Rik	exonic	349
chr13:63398083-63403038-	0	0	1	1	0	2	0	0	0	6.58545	6.58545	9.44345	9.07415	6.58545	9.62495	6.58545	6.58545	6.58545	chr13	63398082	63403038	-	13_63504346_63499391_-4955|18.15|3|3	youxintian_mouse28026	NM_007985	Fancc	exonic	377
chr13:64243634-64248466-	0	0	0	2	0	0	1	0	0	6.58545	6.58545	6.58545	9.93954	6.58545	6.58545	8.8986	6.58545	6.58545	chr13	64243633	64248466	-	mm9_circ_007835	circBase	NM_172587	Cdc14b	sense overlapping	4833
chr13:64243634-64248499-	1	0	0	3	1	2	2	1	0	9.11153	6.58545	6.58545	10.4767	8.98942	9.62495	9.74562	8.88706	6.58545	chr13	64243633	64248499	-	mm9_circ_004941	circBase	NM_172587	Cdc14b	sense overlapping	4866
chr13:68982347-68982544-	0	3	0	0	0	0	0	0	0	6.58545	10.0798	6.58545	6.58545	6.58545	6.58545	6.58545	6.58545	6.58545	chr13	68982346	68982544	-	mm9_circ_018195	circBase	NM_153534	Adcy2	exonic	198
chr13:69512890-69515903-	3	3	0	3	0	2	2	2	3	10.519	10.0798	6.58545	10.4767	6.58545	9.62495	9.74562	9.73278	10.3337	chr13	69512889	69515903	-	mm9_circ_006518	circBase	NM_198600	Papd7	exonic	292
chr13:73809973-73810140+	0	1	0	0	0	2	0	0	0	6.58545	8.73056	6.58545	6.58545	6.58545	9.62495	6.58545	6.58545	6.58545	chr13	73809972	73810140	+		novel	NM_011390	Slc12a7	sense overlapping	168
chr13:74158675-74160497+	0	1	0	0	0	2	1	0	0	6.58545	8.73056	6.58545	6.58545	6.58545	9.62495	8.8986	6.58545	6.58545	chr13	74158674	74160497	+		novel	NM_001081060	Slc9a3	exonic	585
chr13:74671308-74675906+	0	1	3	0	1	0	0	0	0	6.58545	8.73056	10.8892	6.58545	8.98942	6.58545	6.58545	6.58545	6.58545	chr13	74671307	74675906	+	13_74813354_74808756_-4598|14.79|5|6	youxintian_mouse28026	NM_030711	Erap1	exonic	911
chr13:75746292-75770758+	0	0	0	0	0	0	0	0	4	6.58545	6.58545	6.58545	6.58545	6.58545	6.58545	6.58545	6.58545	10.7216	chr13	75746291	75770758	+		novel	NM_138953	Ell2	sense overlapping	24467
chr13:75902178-75917847-	0	0	0	0	3	1	1	0	0	6.58545	6.58545	6.58545	6.58545	10.3801	8.79054	8.8986	6.58545	6.58545	chr13	75902177	75917847	-	13_76055295_76039626_-15669|17.49|6|12	youxintian_mouse28026	NM_028493	Rhobtb3	exonic	746
chr13:76731771-76759820+	0	0	0	0	2	0	1	0	0	6.58545	6.58545	6.58545	6.58545	9.84625	6.58545	8.8986	6.58545	6.58545	chr13	76731770	76759820	+	13_76899081_76871032_-28049|16.26|1|2	youxintian_mouse28026	NM_030174	Mctp1	exonic	341
chr13:76741294-76827801+	0	1	0	0	0	0	0	0	0	6.58545	8.73056	6.58545	6.58545	6.58545	6.58545	6.58545	6.58545	6.58545	chr13	76741293	76827801	+	13_76967062_76880555_-86507|14.62|4|5	youxintian_mouse28026	NM_030174	Mctp1	sense overlapping	86508
chr13:76756986-76806262+	0	0	0	0	0	0	0	0	0	6.58545	6.58545	6.58545	6.58545	6.58545	6.58545	6.58545	6.58545	6.58545	chr13	76756985	76806262	+	13_76945523_76896247_-49276|11.34|14|48	youxintian_mouse28026	NM_030174	Mctp1	exonic	583
chr13:77066600-77126714-	0	1	0	1	0	0	0	0	0	6.58545	8.73056	6.58545	9.07415	6.58545	6.58545	6.58545	6.58545	6.58545	chr13	77066599	77126714	-	13_77265975_77205861_-60114|19.07|19|71	youxintian_mouse28026	NM_134071	Ankrd32	exonic	1966
chr13:77083441-77092411-	0	1	0	1	2	1	0	1	0	6.58545	8.73056	6.58545	9.07415	9.84625	8.79054	6.58545	8.88706	6.58545	chr13	77083440	77092411	-	13_77231672_77222702_-8970|16.12|9|22	youxintian_mouse28026	NM_134071	Ankrd32	exonic	672
chr13:77083441-77126714-	0	0	0	2	0	0	0	0	0	6.58545	6.58545	6.58545	9.93954	6.58545	6.58545	6.58545	6.58545	6.58545	chr13	77083440	77126714	-	13_77265975_77222702_-43273|17.17|4|6	youxintian_mouse28026	NM_134071	Ankrd32	exonic	1818
chr13:77090305-77126714-	2	0	0	0	0	0	0	0	0	9.98053	6.58545	6.58545	6.58545	6.58545	6.58545	6.58545	6.58545	6.58545	chr13	77090304	77126714	-		novel	NM_134071	Ankrd32	exonic	1523
chr13:77192554-77193223+	0	2	0	0	0	0	0	0	0	6.58545	9.5575	6.58545	6.58545	6.58545	6.58545	6.58545	6.58545	6.58545	chr13	77192553	77193223	+		novel	NM_001145676	2210408I21Rik	exonic	670
chr13:77999586-78006472+	0	0	0	0	0	0	0	0	2	6.58545	6.58545	6.58545	6.58545	6.58545	6.58545	6.58545	6.58545	9.80143	chr13	77999585	78006472	+	13_78145733_78138847_-6886|18.12|8|12	youxintian_mouse28026	NM_138312	Fam172a	exonic	202
chr13:84251230-84260240+	0	0	0	0	2	0	1	1	0	6.58545	6.58545	6.58545	6.58545	9.84625	6.58545	8.8986	8.88706	6.58545	chr13	84251229	84260240	+	mm9_circ_007721	circBase	NM_175187	Tmem161b	exonic	286
chr13:89678075-89693501-	0	0	0	0	0	0	0	0	2	6.58545	6.58545	6.58545	6.58545	6.58545	6.58545	6.58545	6.58545	9.80143	chr13	89678074	89693501	-		novel	NM_019389	Vcan	exonic	5687
chr13:91524585-91564694+	2	2	1	2	2	1	0	1	1	9.98053	9.5575	9.44345	9.93954	9.84625	8.79054	6.58545	8.88706	8.94889	chr13	91524584	91564694	+	mm9_circ_009672	circBase	NM_024186	Ssbp2	exonic	220
chr13:92682755-92683438+	0	0	0	0	2	0	0	0	0	6.58545	6.58545	6.58545	6.58545	9.84625	6.58545	6.58545	6.58545	6.58545	chr13	92682754	92683438	+		novel	NM_172588	Serinc5	exonic	265
chr13:93184079-93186476-	0	2	0	0	0	0	0	0	0	6.58545	9.5575	6.58545	6.58545	6.58545	6.58545	6.58545	6.58545	6.58545	chr13	93184078	93186476	-		novel	NM_133905	Papd4	exonic	502
chr13:93341756-93349297+	0	0	0	0	2	0	0	1	0	6.58545	6.58545	6.58545	6.58545	9.84625	6.58545	6.58545	8.88706	6.58545	chr13	93341755	93349297	+	13_94119252_94111711_-7541|18.84|15|46	youxintian_mouse28026	NM_011982	Homer1	exonic	382
chr13:93341756-93356079+	1	10	2	2	5	2	0	1	2	9.11153	11.7243	10.3404	9.93954	11.0749	9.62495	6.58545	8.88706	9.80143	chr13	93341755	93356079	+	mm9_circ_010239	circBase	NM_147176	Homer1	exonic	522
chr13:93387524-93393108+	0	0	0	0	2	0	0	0	0	6.58545	6.58545	6.58545	6.58545	9.84625	6.58545	6.58545	6.58545	6.58545	chr13	93387523	93393108	+	13_94163063_94157479_-5584|18.95|3|3	youxintian_mouse28026	NM_147176	Homer1	exonic	349
chr13:94208136-94233180-	0	0	0	0	0	0	2	0	0	6.58545	6.58545	6.58545	6.58545	6.58545	6.58545	9.74562	6.58545	6.58545	chr13	94208135	94233180	-	13_95003135_94978091_-25044|16.59|5|5	youxintian_mouse28026	NM_029153	Scamp1	exonic	717
chr13:94224895-94233180-	2	1	0	0	1	0	3	2	0	9.98053	8.73056	6.58545	6.58545	8.98942	6.58545	10.2758	9.73278	6.58545	chr13	94224894	94233180	-	13_95003135_94994850_-8285|17.39|16|50	youxintian_mouse28026	NM_029153	Scamp1	exonic	497
chr13:94224895-94253070-	0	0	0	0	2	0	0	0	0	6.58545	6.58545	6.58545	6.58545	9.84625	6.58545	6.58545	6.58545	6.58545	chr13	94224894	94253070	-		novel	NM_029153	Scamp1	exonic	575
chr13:94390792-94408843+	0	0	1	0	0	0	0	0	0	6.58545	6.58545	9.44345	6.58545	6.58545	6.58545	6.58545	6.58545	6.58545	chr13	94390791	94408843	+	13_95178798_95160747_-18051|19.12|7|9	youxintian_mouse28026	NM_009680	Ap3b1	exonic	475
chr13:94479727-94493741+	0	0	0	0	0	0	0	0	0	6.58545	6.58545	6.58545	6.58545	6.58545	6.58545	6.58545	6.58545	6.58545	chr13	94479726	94493741	+	13_95263696_95249682_-14014|17.04|4|4	youxintian_mouse28026	NM_009680	Ap3b1	exonic	369
chr13:94479727-94502024+	0	1	0	0	0	3	1	0	0	6.58545	8.73056	6.58545	6.58545	6.58545	10.1502	8.8986	6.58545	6.58545	chr13	94479726	94502024	+	13_95271979_95249682_-22297|19.19|10|16	youxintian_mouse28026	NM_009680	Ap3b1	exonic	476
chr13:94493669-94542876+	0	0	0	0	0	0	2	0	0	6.58545	6.58545	6.58545	6.58545	6.58545	6.58545	9.74562	6.58545	6.58545	chr13	94493668	94542876	+		novel	NM_009680	Ap3b1	exonic	595
chr13:95362837-95364794-	0	0	0	0	0	0	2	0	0	6.58545	6.58545	6.58545	6.58545	6.58545	6.58545	9.74562	6.58545	6.58545	chr13	95362836	95364794	-		novel	NM_025630	Aggf1	sense overlapping	1958
chr13:95661587-95673756-	0	0	0	2	0	0	0	0	0	6.58545	6.58545	6.58545	9.93954	6.58545	6.58545	6.58545	6.58545	6.58545	chr13	95661586	95673756	-	13_96443711_96431542_-12169|17.73|6|12	youxintian_mouse28026	NM_027711	Iqgap2	exonic	1031
chr13:95707878-95733951-	1	0	0	0	1	0	1	7	0	9.11153	6.58545	6.58545	6.58545	8.98942	6.58545	8.8986	11.4189	6.58545	chr13	95707877	95733951	-	13_96503906_96477833_-26073|17.26|9|21	youxintian_mouse28026	NM_027711	Iqgap2	exonic	1063
chr13:95746438-95837923-	0	0	0	0	0	1	0	0	0	6.58545	6.58545	6.58545	6.58545	6.58545	8.79054	6.58545	6.58545	6.58545	chr13	95746437	95837923	-	13_96607878_96516393_-91485|14.30|11|63	youxintian_mouse28026	NM_027711	Iqgap2	exonic	412
chr13:96598205-96616549+	0	0	0	0	0	0	0	0	0	6.58545	6.58545	6.58545	6.58545	6.58545	6.58545	6.58545	6.58545	6.58545	chr13	96598204	96616549	+		novel	NM_023420	Col4a3bp	exonic	762
chr13:97141927-97150413+	1	1	0	0	0	2	0	0	0	9.11153	8.73056	6.58545	6.58545	6.58545	9.62495	6.58545	6.58545	6.58545	chr13	97141926	97150413	+	mm9_circ_009616	circBase	NM_177266	Gfm2	exonic	540
chr13:97153228-97163174+	0	0	0	0	0	0	0	2	0	6.58545	6.58545	6.58545	6.58545	6.58545	6.58545	6.58545	9.73278	6.58545	chr13	97153227	97163174	+		novel	NM_177266	Gfm2	exonic	801
chr13:97929411-97931263-	0	0	0	0	2	0	0	0	0	6.58545	6.58545	6.58545	6.58545	9.84625	6.58545	6.58545	6.58545	6.58545	chr13	97929410	97931263	-	13_98701218_98699366_-1852|16.33|5|6	youxintian_mouse28026	NM_012026	Arhgef28	exonic	781
chr13:97929411-97936861-	0	3	1	2	2	11	3	5	0	6.58545	10.0798	9.44345	9.93954	9.84625	11.9332	10.2758	10.9535	6.58545	chr13	97929410	97936861	-	13_98706816_98699366_-7450|18.06|14|48	youxintian_mouse28026	NM_012026	Arhgef28	exonic	868
chr13:97978031-97978553-	0	0	0	0	0	0	0	2	0	6.58545	6.58545	6.58545	6.58545	6.58545	6.58545	6.58545	9.73278	6.58545	chr13	97978030	97978553	-		novel	NM_012026	Arhgef28	exonic	257
chr13:97985311-98077320-	2	0	0	0	0	0	0	0	0	9.98053	6.58545	6.58545	6.58545	6.58545	6.58545	6.58545	6.58545	6.58545	chr13	97985310	98077320	-		novel	NM_012026	Arhgef28	exonic	1711
chr13:98029377-98053974-	0	2	0	2	1	2	0	3	3	6.58545	9.5575	6.58545	9.93954	8.98942	9.62495	6.58545	10.2624	10.3337	chr13	98029376	98053974	-	13_98823929_98799332_-24597|15.75|12|44	youxintian_mouse28026	NM_012026	Arhgef28	exonic	549
chr13:98043800-98053974-	0	3	0	0	0	2	6	0	0	6.58545	10.0798	6.58545	6.58545	6.58545	9.62495	11.2188	6.58545	6.58545	chr13	98043799	98053974	-	13_98823929_98813755_-10174|17.87|9|25	youxintian_mouse28026	NM_012026	Arhgef28	exonic	432
chr13:98074999-98077320-	0	1	0	0	2	0	0	0	0	6.58545	8.73056	6.58545	6.58545	9.84625	6.58545	6.58545	6.58545	6.58545	chr13	98074998	98077320	-	13_98847275_98844954_-2321|18.51|14|102	youxintian_mouse28026	NM_012026	Arhgef28	exonic	442
chr13:98755080-98764549-	0	0	0	0	0	0	0	0	0	6.58545	6.58545	6.58545	6.58545	6.58545	6.58545	6.58545	6.58545	6.58545	chr13	98755079	98764549	-		novel	NM_172591	Fcho2	exonic	377
chr13:100075505-100093545-	0	0	0	0	0	0	0	0	0	6.58545	6.58545	6.58545	6.58545	6.58545	6.58545	6.58545	6.58545	6.58545	chr13	100075504	100093545	-	13_100863500_100845460_-18040|13.53|2|3	youxintian_mouse28026	NM_001081061	Bdp1	exonic	978
chr13:100084141-100099229-	0	2	0	0	0	0	0	0	0	6.58545	9.5575	6.58545	6.58545	6.58545	6.58545	6.58545	6.58545	6.58545	chr13	100084140	100099229	-		novel	NM_001081061	Bdp1	exonic	863
chr13:100178247-100189402-	0	0	0	0	0	0	0	0	2	6.58545	6.58545	6.58545	6.58545	6.58545	6.58545	6.58545	6.58545	9.80143	chr13	100178246	100189402	-		novel	NM_010872	Naip2	exonic	1026
chr13:100433203-100433406-	0	2	0	0	0	0	0	0	0	6.58545	9.5575	6.58545	6.58545	6.58545	6.58545	6.58545	6.58545	6.58545	chr13	100433202	100433406	-		novel	NM_008670	Naip1	sense overlapping	204
chr13:100528417-100528698-	0	1	0	0	0	3	0	0	0	6.58545	8.73056	6.58545	6.58545	6.58545	10.1502	6.58545	6.58545	6.58545	chr13	100528416	100528698	-		novel	ENSMUST00000022140	Ocln	intronic	282
chr13:100611433-100612584-	0	0	0	0	0	0	2	0	0	6.58545	6.58545	6.58545	6.58545	6.58545	6.58545	9.74562	6.58545	6.58545	chr13	100611432	100612584	-		novel	NM_001038602	Marveld2	exonic	1152
chr13:100643520-100645245-	0	1	0	0	0	2	0	0	0	6.58545	8.73056	6.58545	6.58545	6.58545	9.62495	6.58545	6.58545	6.58545	chr13	100643519	100645245	-		novel	NM_011233	Rad17	exonic	339
chr13:100653532-100653767+	0	0	0	0	0	0	0	0	0	6.58545	6.58545	6.58545	6.58545	6.58545	6.58545	6.58545	6.58545	6.58545	chr13	100653531	100653767	+		novel	ENSMUST00000022135	Taf9	intronic	236
chr13:100682767-100693708+	2	0	0	0	0	0	0	0	0	9.98053	6.58545	6.58545	6.58545	6.58545	6.58545	6.58545	6.58545	6.58545	chr13	100682766	100693708	+		novel	NM_183115	Ccdc125	exonic	628
chr13:101689399-101709742-	0	0	2	0	0	0	0	0	0	6.58545	6.58545	10.3404	6.58545	6.58545	6.58545	6.58545	6.58545	6.58545	chr13	101689398	101709742	-		novel	NM_001077495	Pik3r1	exonic	784
chr13:101701447-101709742-	1	0	0	0	0	3	0	1	0	9.11153	6.58545	6.58545	6.58545	6.58545	10.1502	6.58545	8.88706	6.58545	chr13	101701446	101709742	-	13_102479697_102471402_-8295|20.65|5|9	youxintian_mouse28026	NM_001077495	Pik3r1	exonic	582
chr13:101708920-101758039-	0	0	0	0	0	2	0	0	0	6.58545	6.58545	6.58545	6.58545	6.58545	9.62495	6.58545	6.58545	6.58545	chr13	101708919	101758039	-		novel	NM_001077495	Pik3r1	exonic	882
chr13:101715624-101729949-	0	0	0	0	0	0	0	0	0	6.58545	6.58545	6.58545	6.58545	6.58545	6.58545	6.58545	6.58545	6.58545	chr13	101715623	101729949	-		novel	ENSMUST00000055518	Pik3r1	intronic	14326
chr13:101757326-101758039-	0	1	3	1	2	0	3	3	1	6.58545	8.73056	10.8892	9.07415	9.84625	6.58545	10.2758	10.2624	8.94889	chr13	101757325	101758039	-	13_102527994_102527281_-713|18.42|12|50	youxintian_mouse28026	NM_001077495	Pik3r1	exonic	714
chr13:102750514-102781245-	0	0	0	0	2	0	0	0	0	6.58545	6.58545	6.58545	6.58545	9.84625	6.58545	6.58545	6.58545	6.58545	chr13	102750513	102781245	-		novel	NM_175171	Mast4	exonic	1989
chr13:103833498-103835028-	0	0	0	1	0	0	0	1	0	6.58545	6.58545	6.58545	9.07415	6.58545	6.58545	6.58545	8.88706	6.58545	chr13	103833497	103835028	-	13_104625108_104623578_-1530|16.04|10|15	youxintian_mouse28026	NM_001005868	Erbb2ip	exonic	1531
chr13:103833498-103841268-	0	0	0	2	0	0	0	0	0	6.58545	6.58545	6.58545	9.93954	6.58545	6.58545	6.58545	6.58545	6.58545	chr13	103833497	103841268	-		novel	NM_001005868	Erbb2ip	exonic	1830
chr13:103833498-103868898-	0	0	0	0	0	0	0	0	0	6.58545	6.58545	6.58545	6.58545	6.58545	6.58545	6.58545	6.58545	6.58545	chr13	103833497	103868898	-		novel	NM_001005868	Erbb2ip	exonic	3302
chr13:103844814-103845625-	0	2	0	0	0	0	0	0	0	6.58545	9.5575	6.58545	6.58545	6.58545	6.58545	6.58545	6.58545	6.58545	chr13	103844813	103845625	-		novel	NM_001005868	Erbb2ip	exonic	296
chr13:103884143-103889285-	16	14	3	14	14	33	17	13	15	12.8552	12.198	10.8892	12.6206	12.5185	13.4943	12.6832	12.2884	12.5671	chr13	103884142	103889285	-	mm9_circ_013774	circBase	NM_001005868	Erbb2ip	exonic	364
chr13:103884143-103897928-	1	3	0	1	0	2	1	4	0	9.11153	10.0798	6.58545	9.07415	6.58545	9.62495	8.8986	10.649	6.58545	chr13	103884142	103897928	-	13_104688008_104674223_-13785|17.98|20|70	youxintian_mouse28026	NM_001005868	Erbb2ip	sense overlapping	13786
chr13:104035587-104052639-	0	0	0	0	0	0	0	0	0	6.58545	6.58545	6.58545	6.58545	6.58545	6.58545	6.58545	6.58545	6.58545	chr13	104035586	104052639	-		novel	NM_029447	Nln	exonic	1158
chr13:104046189-104052639-	0	1	0	0	0	0	0	0	2	6.58545	8.73056	6.58545	6.58545	6.58545	6.58545	6.58545	6.58545	9.80143	chr13	104046188	104052639	-	mm9_circ_018245	circBase	NM_029447	Nln	exonic	705
chr13:104307221-104314383+	0	0	0	0	0	0	0	0	0	6.58545	6.58545	6.58545	6.58545	6.58545	6.58545	6.58545	6.58545	6.58545	chr13	104307220	104314383	+	13_105104463_105097301_-7162|17.23|4|4	youxintian_mouse28026	NM_001081020	Adamts6	exonic	611
chr13:104792499-104797343-	0	0	0	0	0	2	0	1	0	6.58545	6.58545	6.58545	6.58545	6.58545	9.62495	6.58545	8.88706	6.58545	chr13	104792498	104797343	-	13_105587423_105582579_-4844|19.51|11|17	youxintian_mouse28026	NM_026072	Cwc27	exonic	266
chr13:104792499-104806780-	0	0	0	0	0	0	0	0	2	6.58545	6.58545	6.58545	6.58545	6.58545	6.58545	6.58545	6.58545	9.80143	chr13	104792498	104806780	-		novel	NM_026072	Cwc27	exonic	683
chr13:106812208-106842210-	0	2	0	0	0	0	0	0	0	6.58545	9.5575	6.58545	6.58545	6.58545	6.58545	6.58545	6.58545	6.58545	chr13	106812207	106842210	-		novel	NM_029665	Ipo11	exonic	303
chr13:106822956-106848336-	0	0	0	0	0	0	0	0	0	6.58545	6.58545	6.58545	6.58545	6.58545	6.58545	6.58545	6.58545	6.58545	chr13	106822955	106848336	-	13_107638416_107613036_-25380|14.04|5|6	youxintian_mouse28026	NM_029665	Ipo11	exonic	428
chr13:106982524-106988075-	0	0	0	0	1	1	0	0	0	6.58545	6.58545	6.58545	6.58545	8.98942	8.79054	6.58545	6.58545	6.58545	chr13	106982523	106988075	-	13_107778155_107772604_-5551|17.31|19|43	youxintian_mouse28026	NM_008442	Kif2a	exonic	538
chr13:106990038-106993942-	0	0	0	0	0	2	0	0	0	6.58545	6.58545	6.58545	6.58545	6.58545	9.62495	6.58545	6.58545	6.58545	chr13	106990037	106993942	-	13_107784022_107780118_-3904|17.60|4|5	youxintian_mouse28026	NM_008442	Kif2a	exonic	267
chr13:107738372-107748363-	4	8	0	0	0	5	4	2	0	10.9103	11.4126	6.58545	6.58545	6.58545	10.8376	10.6626	9.73278	6.58545	chr13	107738371	107748363	-	mm9_circ_010567	circBase	NM_145456	Zswim6	exonic	912
chr13:107787653-107788009-	2	0	0	0	0	0	0	0	0	9.98053	6.58545	6.58545	6.58545	6.58545	6.58545	6.58545	6.58545	6.58545	chr13	107787652	107788009	-	13_108578203_108577847_-356|19.18|3|7	youxintian_mouse28026	NM_145456	Zswim6	exonic	357
chr13:107840504-107840946-	0	0	0	0	0	0	2	0	0	6.58545	6.58545	6.58545	6.58545	6.58545	6.58545	9.74562	6.58545	6.58545	chr13	107840503	107840946	-	13_108631140_108630698_-442|18.42|3|3	youxintian_mouse28026	ENSMUST00000105097	Zswim6	intronic	443
chr13:108653444-108654265+	0	0	0	0	0	0	0	0	0	6.58545	6.58545	6.58545	6.58545	6.58545	6.58545	6.58545	6.58545	6.58545	chr13	108653443	108654265	+	13_109444459_109443638_-821|16.20|8|13	youxintian_mouse28026	NM_011056	Pde4d	sense overlapping	822
chr13:108654105-108654265+	0	4	0	0	0	2	0	0	0	6.58545	10.4625	6.58545	6.58545	6.58545	9.62495	6.58545	6.58545	6.58545	chr13	108654104	108654265	+	13_109444459_109444299_-160|20.15|4|7	youxintian_mouse28026	uc007rvg.2	Pde4d	exonic	161
chr13:109740387-109769607+	0	0	0	0	3	0	0	0	0	6.58545	6.58545	6.58545	6.58545	10.3801	6.58545	6.58545	6.58545	6.58545	chr13	109740386	109769607	+		novel	NM_011056	Pde4d	exonic	303
chr13:109740387-109772680+	0	0	1	0	0	1	0	0	0	6.58545	6.58545	9.44345	6.58545	6.58545	8.79054	6.58545	6.58545	6.58545	chr13	109740386	109772680	+	13_110562888_110530595_-32293|20.28|12|38	youxintian_mouse28026	NM_011056	Pde4d	exonic	353
chr13:112487709-112490642+	0	1	0	0	0	2	0	0	1	6.58545	8.73056	6.58545	6.58545	6.58545	9.62495	6.58545	6.58545	8.94889	chr13	112487708	112490642	+	13_113280850_113277917_-2933|15.77|3|3	youxintian_mouse28026	NM_010560	Il6st	exonic	476
chr13:113922247-113967790+	0	0	0	0	1	0	0	0	0	6.58545	6.58545	6.58545	6.58545	8.98942	6.58545	6.58545	6.58545	6.58545	chr13	113922246	113967790	+	13_114757998_114712455_-45543|18.35|13|23	youxintian_mouse28026	NM_172595	Arl15	exonic	414
chr13:115030036-115035385-	0	0	1	0	0	1	2	0	0	6.58545	6.58545	9.44345	6.58545	6.58545	8.79054	9.74562	6.58545	6.58545	chr13	115030035	115035385	-	13_115825593_115820244_-5349|17.84|2|2	youxintian_mouse28026	NM_001033228	Itga1	exonic	442
chr13:119464806-119491513+	0	0	0	0	0	0	0	0	3	6.58545	6.58545	6.58545	6.58545	6.58545	6.58545	6.58545	6.58545	10.3337	chr13	119464805	119491513	+		novel	NM_026127	4833420G17Rik	sense overlapping	26708
chr14:7738105-7751583-	0	0	0	0	0	0	0	0	2	6.58545	6.58545	6.58545	6.58545	6.58545	6.58545	6.58545	6.58545	9.80143	chr14	7738104	7751583	-		novel	uc007sei.1	AK041589	sense overlapping	13479
chr14:7739459-7744983-	0	0	0	0	1	5	2	2	0	6.58545	6.58545	6.58545	6.58545	8.98942	10.8376	9.74562	9.73278	6.58545	chr14	7739458	7744983	-	14_8577497_8571973_-5524|14.02|3|4	youxintian_mouse28026	uc007sei.1	AK041589	sense overlapping	5525
chr14:7739459-7751583-	1	5	1	0	1	4	0	1	1	9.11153	10.7647	9.44345	6.58545	8.98942	10.5344	6.58545	8.88706	8.94889	chr14	7739458	7751583	-		novel	uc007sei.1	AK041589	sense overlapping	12125
chr14:7756669-7766248-	3	0	1	0	0	0	0	0	0	10.519	6.58545	9.44345	6.58545	6.58545	6.58545	6.58545	6.58545	6.58545	chr14	7756668	7766248	-	14_8598762_8589183_-9579|12.65|5|18	youxintian_mouse28026	uc007sei.1	AK041589	sense overlapping	9580
chr14:13995007-14013655+	0	0	0	0	1	1	0	0	0	6.58545	6.58545	6.58545	6.58545	8.98942	8.79054	6.58545	6.58545	6.58545	chr14	13995006	14013655	+	mm9_circ_011301	circBase	NM_139227	Atxn7	sense overlapping	18649
chr14:14013073-14013655+	4	3	0	0	1	0	1	1	0	10.9103	10.0798	6.58545	6.58545	8.98942	6.58545	8.8986	8.88706	6.58545	chr14	14013072	14013655	+	14_14846169_14845587_-582|20.07|23|73	youxintian_mouse28026	NM_139227	Atxn7	exonic	366
chr14:14013073-14055882+	0	0	0	0	0	0	0	0	0	6.58545	6.58545	6.58545	6.58545	6.58545	6.58545	6.58545	6.58545	6.58545	chr14	14013072	14055882	+		novel	NM_139227	Atxn7	sense overlapping	42810
chr14:14087283-14090109+	0	1	0	0	3	0	0	3	0	6.58545	8.73056	6.58545	6.58545	10.3801	6.58545	6.58545	10.2624	6.58545	chr14	14087282	14090109	+	14_14922623_14919797_-2826|22.94|16|42	youxintian_mouse28026	NM_139227	Atxn7	exonic	593
chr14:14820778-14840604+	0	0	0	0	2	0	0	0	0	6.58545	6.58545	6.58545	6.58545	9.84625	6.58545	6.58545	6.58545	6.58545	chr14	14820777	14840604	+		novel	NM_001195229	Nek10	sense overlapping	19827
chr14:14820778-14885128+	2	0	0	0	0	0	0	0	0	9.98053	6.58545	6.58545	6.58545	6.58545	6.58545	6.58545	6.58545	6.58545	chr14	14820777	14885128	+		novel	NM_001195229	Nek10	sense overlapping	64351
chr14:16277799-16283473+	0	1	0	0	2	1	0	0	0	6.58545	8.73056	6.58545	6.58545	9.84625	8.79054	6.58545	6.58545	6.58545	chr14	16277798	16283473	+	14_17115987_17110313_-5674|17.31|5|8	youxintian_mouse28026	NM_021504	Ngly1	exonic	602
chr14:16277799-16294673+	0	1	2	1	1	2	1	0	0	6.58545	8.73056	10.3404	9.07415	8.98942	9.62495	8.8986	6.58545	6.58545	chr14	16277798	16294673	+	14_17127187_17110313_-16874|14.00|12|24	youxintian_mouse28026	NM_021504	Ngly1	exonic	953
chr14:17761472-17826975+	0	0	0	0	0	2	0	0	0	6.58545	6.58545	6.58545	6.58545	6.58545	9.62495	6.58545	6.58545	6.58545	chr14	17761471	17826975	+		novel	NM_001113417	Thrb	sense overlapping	65504
chr14:17963061-17963321+	2	2	0	1	0	0	2	0	0	9.98053	9.5575	6.58545	9.07415	6.58545	6.58545	9.74562	6.58545	6.58545	chr14	17963060	17963321	+	mm9_circ_003473	circBase	NM_001113417	Thrb	exonic	261
chr14:18008569-18011270+	0	0	0	0	1	2	0	0	0	6.58545	6.58545	6.58545	6.58545	8.98942	9.62495	6.58545	6.58545	6.58545	chr14	18008568	18011270	+	14_18843784_18841083_-2701|19.59|13|22	youxintian_mouse28026	NM_009380	Thrb	exonic	354
chr14:18211779-18215493-	2	0	0	0	0	0	0	0	0	9.98053	6.58545	6.58545	6.58545	6.58545	6.58545	6.58545	6.58545	6.58545	chr14	18211778	18215493	-		novel	NM_011584	Nr1d2	exonic	806
chr14:18216650-18220056-	0	0	0	0	2	0	0	0	0	6.58545	6.58545	6.58545	6.58545	9.84625	6.58545	6.58545	6.58545	6.58545	chr14	18216649	18220056	-		novel	NM_011584	Nr1d2	exonic	234
chr14:18543769-18545105-	0	0	0	0	0	0	0	0	0	6.58545	6.58545	6.58545	6.58545	6.58545	6.58545	6.58545	6.58545	6.58545	chr14	18543768	18545105	-		novel			intergenic	1337
chr14:18544769-18545105-	3	0	0	0	0	0	1	0	0	10.519	6.58545	6.58545	6.58545	6.58545	6.58545	8.8986	6.58545	6.58545	chr14	18544768	18545105	-		novel			intergenic	337
chr14:20460159-20464946-	0	0	1	0	2	0	0	0	2	6.58545	6.58545	9.44345	6.58545	9.84625	6.58545	6.58545	6.58545	9.80143	chr14	20460158	20464946	-	14_21284168_21279381_-4787|12.23|5|8	youxintian_mouse28026	NM_009674	Anxa7	exonic	730
chr14:20591479-20607905-	0	0	0	2	0	0	0	0	0	6.58545	6.58545	6.58545	9.93954	6.58545	6.58545	6.58545	6.58545	6.58545	chr14	20591478	20607905	-		novel	NM_030180	Usp54	exonic	1052
chr14:21234833-21318183+	0	0	0	0	0	0	2	0	0	6.58545	6.58545	6.58545	6.58545	6.58545	6.58545	9.74562	6.58545	6.58545	chr14	21234832	21318183	+	14_22137405_22054055_-83350|19.17|4|6	youxintian_mouse28026	NM_134079	Adk	exonic	453
chr14:21516626-21517498+	0	0	0	1	1	0	1	3	0	6.58545	6.58545	6.58545	9.07415	8.98942	6.58545	8.8986	10.2624	6.58545	chr14	21516625	21517498	+	mm9_circ_008231	circBase	NM_017479	Kat6b	exonic	873
chr14:21618891-21637640+	0	0	0	0	0	2	0	0	0	6.58545	6.58545	6.58545	6.58545	6.58545	9.62495	6.58545	6.58545	6.58545	chr14	21618890	21637640	+	mm9_circ_015449	circBase	NM_017479	Kat6b	exonic	1023
chr14:21626719-21637640+	0	5	1	0	1	1	0	2	3	6.58545	10.7647	9.44345	6.58545	8.98942	8.79054	6.58545	9.73278	10.3337	chr14	21626718	21637640	+	mm9_circ_003709	circBase	NM_017479	Kat6b	exonic	636
chr14:21626719-21664748+	1	1	1	0	6	5	1	3	1	9.11153	8.73056	9.44345	6.58545	11.3272	10.8376	8.8986	10.2624	8.94889	chr14	21626718	21664748	+	14_22483970_22445941_-38029|15.05|22|129	youxintian_mouse28026	NM_017479	Kat6b	exonic	1629
chr14:21792404-21793674+	0	0	0	0	2	0	0	0	0	6.58545	6.58545	6.58545	6.58545	9.84625	6.58545	6.58545	6.58545	6.58545	chr14	21792403	21793674	+	14_22612896_22611626_-1270|12.75|3|3	youxintian_mouse28026	NM_026283	Samd8	sense overlapping	1271
chr14:21833801-21838043+	0	2	0	0	0	1	0	0	0	6.58545	9.5575	6.58545	6.58545	6.58545	8.79054	6.58545	6.58545	6.58545	chr14	21833800	21838043	+		novel	NM_011695	Vdac2	exonic	256
chr14:22577848-22596542+	0	3	0	0	0	1	1	0	0	6.58545	10.0798	6.58545	6.58545	6.58545	8.79054	8.8986	6.58545	6.58545	chr14	22577847	22596542	+	14_23415764_23397070_-18694|20.40|3|3	youxintian_mouse28026	NM_028275	1700112E06Rik	exonic	385
chr14:23590641-23650186-	0	0	0	0	0	0	0	0	0	6.58545	6.58545	6.58545	6.58545	6.58545	6.58545	6.58545	6.58545	6.58545	chr14	23590640	23650186	-		novel	NM_010610	Kcnma1	exonic	268
chr14:23878697-23908586-	0	0	0	0	0	0	0	0	0	6.58545	6.58545	6.58545	6.58545	6.58545	6.58545	6.58545	6.58545	6.58545	chr14	23878696	23908586	-		novel	NM_001253358	Kcnma1	intronic	29890
chr14:24190318-24192954-	0	0	0	1	0	3	0	1	0	6.58545	6.58545	6.58545	9.07415	6.58545	10.1502	6.58545	8.88706	6.58545	chr14	24190317	24192954	-	mm9_circ_001889	circBase	NM_027726	Dlg5	exonic	491
chr14:24470534-24482534-	0	0	0	0	0	0	0	0	0	6.58545	6.58545	6.58545	6.58545	6.58545	6.58545	6.58545	6.58545	6.58545	chr14	24470533	24482534	-		novel	NM_001081247	Polr3a	exonic	1419
chr14:26438679-26470400-	2	0	0	0	0	0	0	0	0	9.98053	6.58545	6.58545	6.58545	6.58545	6.58545	6.58545	6.58545	6.58545	chr14	26438678	26470400	-	14_27289886_27258165_-31721|15.06|5|5	youxintian_mouse28026	NM_032008	Slmap	exonic	1019
chr14:26460042-26482966-	0	0	0	0	0	0	0	2	0	6.58545	6.58545	6.58545	6.58545	6.58545	6.58545	6.58545	9.73278	6.58545	chr14	26460041	26482966	-	14_27302452_27279528_-22924|20.28|3|3	youxintian_mouse28026	NM_032008	Slmap	exonic	937
chr14:26646659-26653177+	0	0	0	0	0	0	0	0	0	6.58545	6.58545	6.58545	6.58545	6.58545	6.58545	6.58545	6.58545	6.58545	chr14	26646658	26653177	+		novel	NM_007479	Arf4	exonic	263
chr14:26940244-26958511-	0	0	0	0	0	0	0	0	0	6.58545	6.58545	6.58545	6.58545	6.58545	6.58545	6.58545	6.58545	6.58545	chr14	26940243	26958511	-		novel	NM_145221	Appl1	exonic	1065
chr14:26942648-26945601-	2	0	1	0	0	1	0	0	0	9.98053	6.58545	9.44345	6.58545	6.58545	8.79054	6.58545	6.58545	6.58545	chr14	26942647	26945601	-	14_27758787_27755834_-2953|19.90|5|8	youxintian_mouse28026	NM_145221	Appl1	exonic	332
chr14:27152962-27208955+	0	2	0	0	0	0	1	0	0	6.58545	9.5575	6.58545	6.58545	6.58545	6.58545	8.8986	6.58545	6.58545	chr14	27152961	27208955	+		novel	NM_001289686	Arhgef3	exonic	161
chr14:27438599-27442620+	0	2	0	3	4	3	0	2	5	6.58545	9.5575	6.58545	10.4767	10.769	10.1502	6.58545	9.73278	11.0271	chr14	27438598	27442620	+	14_28255806_28251785_-4021|18.23|27|270	youxintian_mouse28026	NM_028945	Fam208a	exonic	566
chr14:27438599-27450049+	0	1	1	0	1	0	0	0	4	6.58545	8.73056	9.44345	6.58545	8.98942	6.58545	6.58545	6.58545	10.7216	chr14	27438598	27450049	+	14_28263235_28251785_-11450|15.58|20|74	youxintian_mouse28026	NM_028945	Fam208a	exonic	1037
chr14:27449757-27450049+	0	0	0	0	0	0	2	0	0	6.58545	6.58545	6.58545	6.58545	6.58545	6.58545	9.74562	6.58545	6.58545	chr14	27449756	27450049	+	14_28263235_28262943_-292|15.96|5|7	youxintian_mouse28026	NM_028945	Fam208a	exonic	208
chr14:27459779-27461785+	0	0	0	0	0	0	0	0	0	6.58545	6.58545	6.58545	6.58545	6.58545	6.58545	6.58545	6.58545	6.58545	chr14	27459778	27461785	+		novel	NM_028945	Fam208a	exonic	847
chr14:27479629-27482630+	0	0	0	0	2	0	0	0	0	6.58545	6.58545	6.58545	6.58545	9.84625	6.58545	6.58545	6.58545	6.58545	chr14	27479628	27482630	+		novel	NM_028945	Fam208a	sense overlapping	3002
chr14:30346798-30350949-	0	0	0	0	1	0	0	0	0	6.58545	6.58545	6.58545	6.58545	8.98942	6.58545	6.58545	6.58545	6.58545	chr14	30346797	30350949	-	14_31164135_31159984_-4151|21.67|3|3	youxintian_mouse28026	NM_028981	Cacna1d	exonic	416
chr14:30482193-30484586+	1	0	0	0	0	1	0	0	0	9.11153	6.58545	6.58545	6.58545	6.58545	8.79054	6.58545	6.58545	6.58545	chr14	30482192	30484586	+	14_31297772_31295379_-2393|13.98|10|104	youxintian_mouse28026	NM_133761	Dcp1a	exonic	169
chr14:30604107-30605901-	0	0	0	0	0	0	0	0	0	6.58545	6.58545	6.58545	6.58545	6.58545	6.58545	6.58545	6.58545	6.58545	chr14	30604106	30605901	-		novel	NM_011103	Prkcd	exonic	317
chr14:30769799-30784189+	0	0	0	0	0	0	0	0	0	6.58545	6.58545	6.58545	6.58545	6.58545	6.58545	6.58545	6.58545	6.58545	chr14	30769798	30784189	+		novel	NM_019460	Sfmbt1	exonic	672
chr14:31013429-31013795+	0	0	0	0	0	0	0	2	0	6.58545	6.58545	6.58545	6.58545	6.58545	6.58545	6.58545	9.73278	6.58545	chr14	31013428	31013795	+		novel	NM_153547	Gnl3	antisense	367
chr14:31030844-31036059+	0	0	0	2	2	0	0	0	1	6.58545	6.58545	6.58545	9.93954	9.84625	6.58545	6.58545	6.58545	8.94889	chr14	31030843	31036059	+	14_31849245_31844030_-5215|14.67|19|64	youxintian_mouse28026	NM_001081251	Pbrm1	exonic	409
chr14:31061469-31074982+	0	0	0	0	0	1	0	0	0	6.58545	6.58545	6.58545	6.58545	6.58545	8.79054	6.58545	6.58545	6.58545	chr14	31061468	31074982	+	14_31888168_31874655_-13513|13.97|22|101	youxintian_mouse28026	NM_001081251	Pbrm1	exonic	1238
chr14:31179836-31187718-	0	3	0	0	0	0	0	0	0	6.58545	10.0798	6.58545	6.58545	6.58545	6.58545	6.58545	6.58545	6.58545	chr14	31179835	31187718	-		novel	NM_022656	Nisch	exonic	785
chr14:31184942-31185425-	2	2	0	0	0	0	0	0	0	9.98053	9.5575	6.58545	6.58545	6.58545	6.58545	6.58545	6.58545	6.58545	chr14	31184941	31185425	-		novel	NM_022656	Nisch	exonic	223
chr14:32217660-32242346+	0	0	0	0	0	0	2	0	0	6.58545	6.58545	6.58545	6.58545	6.58545	6.58545	9.74562	6.58545	6.58545	chr14	32217659	32242346	+	14_33055532_33030846_-24686|21.59|5|5	youxintian_mouse28026	NM_011960	Parg	exonic	326
chr14:32258078-32262831+	0	2	0	0	0	0	0	0	0	6.58545	9.5575	6.58545	6.58545	6.58545	6.58545	6.58545	6.58545	6.58545	chr14	32258077	32262831	+	14_33076017_33071264_-4753|13.82|9|13	youxintian_mouse28026	NM_011960	Parg	exonic	224
chr14:32526149-32526878+	0	0	1	0	0	2	0	0	0	6.58545	6.58545	9.44345	6.58545	6.58545	9.62495	6.58545	6.58545	6.58545	chr14	32526148	32526878	+	mm9_circ_001192	circBase	NM_001081221	Ercc6	exonic	730
chr14:32973536-32986748-	0	0	0	0	0	0	0	0	3	6.58545	6.58545	6.58545	6.58545	6.58545	6.58545	6.58545	6.58545	10.3337	chr14	32973535	32986748	-		novel	NM_001146022	Wdfy4	exonic	838
chr14:33383935-33386598-	0	0	0	0	0	0	0	0	0	6.58545	6.58545	6.58545	6.58545	6.58545	6.58545	6.58545	6.58545	6.58545	chr14	33383934	33386598	-		novel	NM_016700	Mapk8	sense overlapping	2664
chr14:34259625-34268952-	0	1	0	0	2	0	0	0	0	6.58545	8.73056	6.58545	6.58545	9.84625	6.58545	6.58545	6.58545	6.58545	chr14	34259624	34268952	-	14_35082138_35072811_-9327|11.58|12|16	youxintian_mouse28026	NM_029389	Fam35a	exonic	1560
chr14:34676954-34692734+	0	0	0	0	0	0	0	0	0	6.58545	6.58545	6.58545	6.58545	6.58545	6.58545	6.58545	6.58545	6.58545	chr14	34676953	34692734	+		novel	NM_001004436	Wapal	exonic	1574
chr14:34676954-34695105+	0	2	0	0	0	1	0	1	2	6.58545	9.5575	6.58545	6.58545	6.58545	8.79054	6.58545	8.88706	9.80143	chr14	34676953	34695105	+	14_35508291_35490140_-18151|20.48|8|10	youxintian_mouse28026	NM_001004436	Wapal	exonic	1693
chr14:34691682-34695105+	0	5	1	1	4	7	2	5	3	6.58545	10.7647	9.44345	9.07415	10.769	11.3012	9.74562	10.9535	10.3337	chr14	34691681	34695105	+	mm9_circ_002816	circBase	NM_001004436	Wapal	exonic	1172
chr14:34698583-34698739+	1	0	0	1	1	0	1	3	0	9.11153	6.58545	6.58545	9.07415	8.98942	6.58545	8.8986	10.2624	6.58545	chr14	34698582	34698739	+		novel	ENSMUST00000048263	Wapal	intronic	157
chr14:34724706-34729407+	0	0	0	1	0	0	0	0	0	6.58545	6.58545	6.58545	9.07415	6.58545	6.58545	6.58545	6.58545	6.58545	chr14	34724705	34729407	+	14_35542593_35537892_-4701|15.33|5|5	youxintian_mouse28026	NM_001004436	Wapal	exonic	630
chr14:34724706-34733807+	0	0	0	0	0	0	0	2	0	6.58545	6.58545	6.58545	6.58545	6.58545	6.58545	6.58545	9.73278	6.58545	chr14	34724705	34733807	+		novel	NM_001004436	Wapal	exonic	920
chr14:34724706-34736845+	0	0	0	0	0	0	0	0	0	6.58545	6.58545	6.58545	6.58545	6.58545	6.58545	6.58545	6.58545	6.58545	chr14	34724705	34736845	+		novel	NM_001004436	Wapal	exonic	1096
chr14:34730549-34731609+	0	1	1	0	0	0	1	0	2	6.58545	8.73056	9.44345	6.58545	6.58545	6.58545	8.8986	6.58545	9.80143	chr14	34730548	34731609	+	14_35544795_35543735_-1060|14.57|12|19	youxintian_mouse28026	NM_001004436	Wapal	exonic	213
chr14:36896255-36909212-	1	0	1	3	0	0	0	0	0	9.11153	6.58545	9.44345	10.4767	6.58545	6.58545	6.58545	6.58545	6.58545	chr14	36896254	36909212	-		novel	NM_027045	Ccser2	exonic	457
chr14:36926839-36941264-	1	1	0	0	1	0	0	0	0	9.11153	8.73056	6.58545	6.58545	8.98942	6.58545	6.58545	6.58545	6.58545	chr14	36926838	36941264	-	14_37754450_37740025_-14425|21.22|16|47	youxintian_mouse28026	NM_027045	Ccser2	exonic	1741
chr14:36938584-36941264-	0	2	0	0	0	1	1	0	0	6.58545	9.5575	6.58545	6.58545	6.58545	8.79054	8.8986	6.58545	6.58545	chr14	36938583	36941264	-	mm9_circ_012693	circBase	NM_027045	Ccser2	exonic	1650
chr14:45140418-45172604-	0	2	0	0	0	0	0	0	0	6.58545	9.5575	6.58545	6.58545	6.58545	6.58545	6.58545	6.58545	6.58545	chr14	45140417	45172604	-		novel	NM_172597	Txndc16	exonic	1680
chr14:45329911-45330909+	0	0	0	2	0	0	0	0	0	6.58545	6.58545	6.58545	9.93954	6.58545	6.58545	6.58545	6.58545	6.58545	chr14	45329910	45330909	+		novel	NM_025959	Psmc6	sense overlapping	999
chr14:45354946-45366659+	0	0	0	0	0	2	1	0	0	6.58545	6.58545	6.58545	6.58545	6.58545	9.62495	8.8986	6.58545	6.58545	chr14	45354945	45366659	+		novel	NM_019637	Styx	exonic	246
chr14:45354946-45367718+	0	0	0	1	0	0	0	2	1	6.58545	6.58545	6.58545	9.07415	6.58545	6.58545	6.58545	9.73278	8.94889	chr14	45354945	45367718	+		novel	NM_019637	Styx	exonic	283
chr14:45469240-45472879-	2	0	0	0	0	0	0	0	0	9.98053	6.58545	6.58545	6.58545	6.58545	6.58545	6.58545	6.58545	6.58545	chr14	45469239	45472879	-		novel	NM_146054	Fermt2	exonic	243
chr14:45616530-45629753-	1	0	0	2	1	2	1	0	0	9.11153	6.58545	6.58545	9.93954	8.98942	9.62495	8.8986	6.58545	6.58545	chr14	45616529	45629753	-	14_46249428_46236205_-13223|17.92|17|82	youxintian_mouse28026	NM_176845	Ddhd1	exonic	558
chr14:46778889-46780225-	0	0	0	0	0	0	3	0	0	6.58545	6.58545	6.58545	6.58545	6.58545	6.58545	10.2758	6.58545	6.58545	chr14	46778888	46780225	-		novel	NM_009919	Cnih1	exonic	257
chr14:47016277-47016795+	0	4	1	0	4	1	1	1	2	6.58545	10.4625	9.44345	6.58545	10.769	8.79054	8.8986	8.88706	9.80143	chr14	47016276	47016795	+	mm9_circ_005305	circBase	NM_028966	Samd4	exonic	519
chr14:47016277-47053113+	0	0	0	0	0	0	0	0	2	6.58545	6.58545	6.58545	6.58545	6.58545	6.58545	6.58545	6.58545	9.80143	chr14	47016276	47053113	+		novel	NM_001037221	Samd4	exonic	783
chr14:48168197-48179276+	0	0	0	0	1	0	1	1	0	6.58545	6.58545	6.58545	6.58545	8.98942	6.58545	8.8986	8.88706	6.58545	chr14	48168196	48179276	+	mm9_circ_008478	circBase	uc007tji.1	Peli2	intronic	11080
chr14:49015417-49017560-	0	0	0	0	0	0	0	0	0	6.58545	6.58545	6.58545	6.58545	6.58545	6.58545	6.58545	6.58545	6.58545	chr14	49015416	49017560	-		novel	NM_207214	Exoc5	exonic	412
chr14:49033271-49052392-	0	0	0	0	0	0	2	0	1	6.58545	6.58545	6.58545	6.58545	6.58545	6.58545	9.74562	6.58545	8.94889	chr14	49033270	49052392	-	mm9_circ_001144	circBase	NM_207214	Exoc5	exonic	1269
chr14:50837038-50837611-	0	0	0	0	0	0	0	0	0	6.58545	6.58545	6.58545	6.58545	6.58545	6.58545	6.58545	6.58545	6.58545	chr14	50837037	50837611	-		novel	NM_009351	Tep1	sense overlapping	574
chr14:51994880-51996407+	0	0	0	0	0	0	0	0	0	6.58545	6.58545	6.58545	6.58545	6.58545	6.58545	6.58545	6.58545	6.58545	chr14	51994879	51996407	+	14_52616082_52614555_-1527|21.51|3|3	youxintian_mouse28026	NM_198249	Arhgef40	exonic	394
chr14:52231537-52232657-	0	0	0	0	0	0	0	0	0	6.58545	6.58545	6.58545	6.58545	6.58545	6.58545	6.58545	6.58545	6.58545	chr14	52231536	52232657	-		novel	NM_201637	Chd8	sense overlapping	1121
chr14:54544205-54552210-	0	2	0	0	0	0	0	0	0	6.58545	9.5575	6.58545	6.58545	6.58545	6.58545	6.58545	6.58545	6.58545	chr14	54544204	54552210	-		novel	NM_145462	Haus4	exonic	727
chr14:54662168-54667161-	3	15	0	8	2	3	10	6	7	10.519	12.2955	6.58545	11.8296	9.84625	10.1502	11.9323	11.2049	11.4934	chr14	54662167	54667161	-	14_55285998_55281005_-4993|15.06|16|47	youxintian_mouse28026	NM_023190	Acin1	exonic	1687
chr14:54897121-54897272+	0	0	0	1	0	0	1	3	0	6.58545	6.58545	6.58545	9.07415	6.58545	6.58545	8.8986	10.2624	6.58545	chr14	54897120	54897272	+	14_55516109_55515958_-151|21.37|17|50	youxintian_mouse28026	NM_019402	Pabpn1	exonic	152
chr14:56011144-56011315-	0	0	0	0	0	1	0	0	0	6.58545	6.58545	6.58545	6.58545	6.58545	8.79054	6.58545	6.58545	6.58545	chr14	56011143	56011315	-		novel	NR_002889	Gm5801	sense overlapping	172
chr14:56748835-56772006-	0	1	0	0	1	1	0	0	0	6.58545	8.73056	6.58545	6.58545	8.98942	8.79054	6.58545	6.58545	6.58545	chr14	56748834	56772006	-	mm9_circ_010446	circBase	NM_025682	Pspc1	exonic	789
chr14:56902696-56914168+	0	0	2	0	0	1	2	0	0	6.58545	6.58545	10.3404	6.58545	6.58545	8.79054	9.74562	6.58545	6.58545	chr14	56902695	56914168	+	14_57533005_57521533_-11472|20.17|8|11	youxintian_mouse28026	NM_029498	Zmym2	exonic	1519
chr14:56932089-56953405+	0	0	0	0	2	0	0	0	0	6.58545	6.58545	6.58545	6.58545	9.84625	6.58545	6.58545	6.58545	6.58545	chr14	56932088	56953405	+		novel	NM_029498	Zmym2	sense overlapping	21317
chr14:56947947-56950328+	0	0	0	0	0	1	0	1	0	6.58545	6.58545	6.58545	6.58545	6.58545	8.79054	6.58545	8.88706	6.58545	chr14	56947946	56950328	+	14_57569165_57566784_-2381|14.14|6|7	youxintian_mouse28026	NM_029498	Zmym2	exonic	416
chr14:57303593-57313129-	0	1	0	1	1	1	1	0	0	6.58545	8.73056	6.58545	9.07415	8.98942	8.79054	8.8986	6.58545	6.58545	chr14	57303592	57313129	-	mm9_circ_010120	circBase	NM_030004	Cryl1	exonic	357
chr14:57303593-57363048-	0	0	0	0	0	0	0	0	0	6.58545	6.58545	6.58545	6.58545	6.58545	6.58545	6.58545	6.58545	6.58545	chr14	57303592	57363048	-		novel	NM_030004	Cryl1	exonic	484
chr14:57833672-57834817-	0	0	0	0	0	2	0	0	0	6.58545	6.58545	6.58545	6.58545	6.58545	9.62495	6.58545	6.58545	6.58545	chr14	57833671	57834817	-		novel	NM_029492	Zdhhc20	sense overlapping	1146
chr14:57846921-57865641-	0	0	0	1	1	0	0	0	0	6.58545	6.58545	6.58545	9.07415	8.98942	6.58545	6.58545	6.58545	6.58545	chr14	57846920	57865641	-	mm9_circ_009555	circBase	NM_029492	Zdhhc20	exonic	487
chr14:57856610-57858609-	0	0	0	0	0	0	0	0	0	6.58545	6.58545	6.58545	6.58545	6.58545	6.58545	6.58545	6.58545	6.58545	chr14	57856609	57858609	-	14_58477446_58475447_-1999|23.09|5|6	youxintian_mouse28026	NM_029492	Zdhhc20	exonic	224
chr14:57856610-57865641-	0	0	2	0	0	1	1	0	2	6.58545	6.58545	10.3404	6.58545	6.58545	8.79054	8.8986	6.58545	9.80143	chr14	57856609	57865641	-	14_58484478_58475447_-9031|21.59|14|30	youxintian_mouse28026	NM_029492	Zdhhc20	exonic	345
chr14:57943588-57955030-	3	1	0	0	1	1	0	0	0	10.519	8.73056	6.58545	6.58545	8.98942	8.79054	6.58545	6.58545	6.58545	chr14	57943587	57955030	-	mm9_circ_010984	circBase	NM_028643	Micu2	exonic	239
chr14:60008355-60017665-	0	0	0	0	0	0	2	0	0	6.58545	6.58545	6.58545	6.58545	6.58545	6.58545	9.74562	6.58545	6.58545	chr14	60008354	60017665	-		novel	NM_015803	Atp8a2	exonic	534
chr14:60239481-60247466-	0	0	0	2	0	0	1	1	1	6.58545	6.58545	6.58545	9.93954	6.58545	6.58545	8.8986	8.88706	8.94889	chr14	60239480	60247466	-	14_60866303_60858318_-7985|11.86|13|21	youxintian_mouse28026	NM_170591	Nupl1	exonic	633
chr14:60843208-60875307+	0	0	0	0	0	2	0	0	0	6.58545	6.58545	6.58545	6.58545	6.58545	9.62495	6.58545	6.58545	6.58545	chr14	60843207	60875307	+	mm9_circ_008816	circBase	NM_027436	Mipep	exonic	391
chr14:62346568-62353637+	0	0	0	0	0	1	0	0	0	6.58545	6.58545	6.58545	6.58545	6.58545	8.79054	6.58545	6.58545	6.58545	chr14	62346567	62353637	+	14_62972474_62965405_-7069|19.48|8|14	youxintian_mouse28026	NM_026001	Rnaseh2b	exonic	375
chr14:64742307-64747139+	0	2	0	0	0	0	0	0	0	6.58545	9.5575	6.58545	6.58545	6.58545	6.58545	6.58545	6.58545	6.58545	chr14	64742306	64747139	+		novel	NM_001081177	Kif13b	exonic	620
chr14:64742307-64760801+	0	0	0	0	0	0	0	0	0	6.58545	6.58545	6.58545	6.58545	6.58545	6.58545	6.58545	6.58545	6.58545	chr14	64742306	64760801	+		novel	NM_001081177	Kif13b	exonic	1671
chr14:64748446-64760801+	0	0	0	0	0	0	2	0	0	6.58545	6.58545	6.58545	6.58545	6.58545	6.58545	9.74562	6.58545	6.58545	chr14	64748445	64760801	+		novel	NM_001081177	Kif13b	exonic	1051
chr14:64779314-64789698+	0	0	0	0	2	0	0	0	0	6.58545	6.58545	6.58545	6.58545	9.84625	6.58545	6.58545	6.58545	6.58545	chr14	64779313	64789698	+		novel	NM_001081177	Kif13b	exonic	531
chr14:64896650-64897126-	0	0	0	0	0	0	1	0	0	6.58545	6.58545	6.58545	6.58545	6.58545	6.58545	8.8986	6.58545	6.58545	chr14	64896649	64897126	-	14_65515963_65515487_-476|18.15|10|14	youxintian_mouse28026	NM_177338	Hmbox1	exonic	477
chr14:65547134-65549485-	0	0	0	0	0	0	0	0	3	6.58545	6.58545	6.58545	6.58545	6.58545	6.58545	6.58545	6.58545	10.3337	chr14	65547133	65549485	-	14_66168322_66165971_-2351|11.98|7|15	youxintian_mouse28026	NM_028811	Elp3	exonic	376
chr14:66159450-66159605-	0	0	0	0	0	0	0	0	2	6.58545	6.58545	6.58545	6.58545	6.58545	6.58545	6.58545	6.58545	9.80143	chr14	66159449	66159605	-		novel	ENSMUST00000022622	Ptk2b	intronic	156
chr14:66803270-66803432-	0	0	0	2	0	0	0	0	0	6.58545	6.58545	6.58545	9.93954	6.58545	6.58545	6.58545	6.58545	6.58545	chr14	66803269	66803432	-		novel	NM_009955	Dpysl2	sense overlapping	163
chr14:67817513-67819713-	0	0	0	0	0	0	0	0	0	6.58545	6.58545	6.58545	6.58545	6.58545	6.58545	6.58545	6.58545	6.58545	chr14	67817512	67819713	-		novel	NM_177780	Dock5	exonic	361
chr14:67836314-67846137-	0	0	0	0	0	0	0	0	0	6.58545	6.58545	6.58545	6.58545	6.58545	6.58545	6.58545	6.58545	6.58545	chr14	67836313	67846137	-		novel	NM_177780	Dock5	exonic	655
chr14:69793904-69798324-	0	0	0	0	0	0	0	0	0	6.58545	6.58545	6.58545	6.58545	6.58545	6.58545	6.58545	6.58545	6.58545	chr14	69793903	69798324	-	14_70198131_70193711_-4420|20.87|2|4	youxintian_mouse28026	NM_153514	Rhobtb2	exonic	1475
chr14:70256360-70267506-	0	0	0	0	0	0	0	0	2	6.58545	6.58545	6.58545	6.58545	6.58545	6.58545	6.58545	6.58545	9.80143	chr14	70256359	70267506	-	14_70667313_70656167_-11146|16.07|24|85	youxintian_mouse28026	NM_008915	Ppp3cc	exonic	435
chr14:70591575-70594047-	0	0	0	0	3	0	0	0	0	6.58545	6.58545	6.58545	6.58545	10.3801	6.58545	6.58545	6.58545	6.58545	chr14	70591574	70594047	-		novel	NM_194345	Fam160b2	exonic	252
chr14:70678079-70682850-	0	0	0	0	2	0	0	4	1	6.58545	6.58545	6.58545	6.58545	9.84625	6.58545	6.58545	10.649	8.94889	chr14	70678078	70682850	-	mm9_circ_014309	circBase	NM_023045	Xpo7	sense overlapping	4772
chr14:70690982-70695687-	0	0	0	0	0	0	0	0	2	6.58545	6.58545	6.58545	6.58545	6.58545	6.58545	6.58545	6.58545	9.80143	chr14	70690981	70695687	-		novel	NM_023045	Xpo7	exonic	514
chr14:72552472-72574680-	0	0	0	0	0	0	2	0	0	6.58545	6.58545	6.58545	6.58545	6.58545	6.58545	9.74562	6.58545	6.58545	chr14	72552471	72574680	-		novel	NM_207636	Fndc3a	exonic	2463
chr14:72563484-72584844-	0	0	1	2	0	3	2	1	1	6.58545	6.58545	9.44345	9.93954	6.58545	10.1502	9.74562	8.88706	8.94889	chr14	72563483	72584844	-	mm9_circ_007325	circBase	NM_207636	Fndc3a	exonic	1335
chr14:72589758-72599142-	0	0	0	0	0	0	0	0	0	6.58545	6.58545	6.58545	6.58545	6.58545	6.58545	6.58545	6.58545	6.58545	chr14	72589757	72599142	-		novel	NM_207636	Fndc3a	sense overlapping	9385
chr14:72652016-72683771-	0	2	3	0	0	3	1	0	0	6.58545	9.5575	10.8892	6.58545	6.58545	10.1502	8.8986	6.58545	6.58545	chr14	72652015	72683771	-	mm9_circ_005137	circBase	NM_207636	Fndc3a	exonic	214
chr14:73030409-73034448-	0	0	0	0	0	2	0	0	0	6.58545	6.58545	6.58545	6.58545	6.58545	9.62495	6.58545	6.58545	6.58545	chr14	73030408	73034448	-		novel	NM_133720	Cysltr2	sense overlapping	4040
chr14:73262529-73265632-	0	0	0	0	0	0	1	0	1	6.58545	6.58545	6.58545	6.58545	6.58545	6.58545	8.8986	6.58545	8.94889	chr14	73262528	73265632	-	14_73665439_73662336_-3103|14.37|11|15	youxintian_mouse28026	NM_009029	Rb1	exonic	480
chr14:73262529-73273746-	0	2	0	0	0	0	0	1	1	6.58545	9.5575	6.58545	6.58545	6.58545	6.58545	6.58545	8.88706	8.94889	chr14	73262528	73273746	-	14_73673553_73662336_-11217|13.51|9|13	youxintian_mouse28026	NM_009029	Rb1	exonic	756
chr14:73322017-73339811-	0	0	0	0	0	0	0	0	0	6.58545	6.58545	6.58545	6.58545	6.58545	6.58545	6.58545	6.58545	6.58545	chr14	73322016	73339811	-		novel	NM_009029	Rb1	sense overlapping	17795
chr14:73568634-73569024+	0	0	0	0	0	0	0	0	0	6.58545	6.58545	6.58545	6.58545	6.58545	6.58545	6.58545	6.58545	6.58545	chr14	73568633	73569024	+	14_73968831_73968441_-390|17.99|4|6	youxintian_mouse28026	NM_011506	Sucla2	exonic	263
chr14:73579356-73581817+	2	0	0	0	0	0	0	0	0	9.98053	6.58545	6.58545	6.58545	6.58545	6.58545	6.58545	6.58545	6.58545	chr14	73579355	73581817	+		novel	NM_011506	Sucla2	exonic	268
chr14:74775581-74786390-	1	3	0	1	6	3	1	3	2	9.11153	10.0798	6.58545	9.07415	11.3272	10.1502	8.8986	10.2624	9.80143	chr14	74775580	74786390	-	mm9_circ_013364	circBase	NM_001033439	Lrch1	exonic	326
chr14:74826598-74835775-	0	1	0	0	0	0	0	0	0	6.58545	8.73056	6.58545	6.58545	6.58545	6.58545	6.58545	6.58545	6.58545	chr14	74826597	74835775	-		novel	NM_001033439	Lrch1	exonic	233
chr14:75707090-75748075-	0	0	0	2	0	0	0	0	0	6.58545	6.58545	6.58545	9.93954	6.58545	6.58545	6.58545	6.58545	6.58545	chr14	75707089	75748075	-		novel	NM_177381	Cog3	sense overlapping	40986
chr14:75844551-75844969-	0	0	0	0	0	0	0	0	2	6.58545	6.58545	6.58545	6.58545	6.58545	6.58545	6.58545	6.58545	9.80143	chr14	75844550	75844969	-		novel	NR_045294	Gm4285	sense overlapping	419
chr14:77927170-77939935+	1	0	0	0	0	2	0	0	1	9.11153	6.58545	6.58545	6.58545	6.58545	9.62495	6.58545	6.58545	8.94889	chr14	77927169	77939935	+	14_78339742_78326977_-12765|21.16|9|11	youxintian_mouse28026	NM_029495	Epsti1	exonic	375
chr14:77927170-77974597+	1	1	0	0	0	2	0	0	0	9.11153	8.73056	6.58545	6.58545	6.58545	9.62495	6.58545	6.58545	6.58545	chr14	77927169	77974597	+		novel	NM_029495	Epsti1	exonic	583
chr14:78651681-78653796-	0	0	0	0	1	2	0	0	1	6.58545	6.58545	6.58545	6.58545	8.98942	9.62495	6.58545	6.58545	8.94889	chr14	78651680	78653796	-	mm9_circ_015316	circBase	NM_001081336	Dgkh	exonic	192
chr14:78925262-78949577+	2	0	0	0	0	0	0	0	0	9.98053	6.58545	6.58545	6.58545	6.58545	6.58545	6.58545	6.58545	6.58545	chr14	78925261	78949577	+	14_79349384_79325069_-24315|14.54|4|5	youxintian_mouse28026	NM_027906	Vwa8	exonic	942
chr14:78933666-79026077+	0	0	0	0	0	4	0	0	0	6.58545	6.58545	6.58545	6.58545	6.58545	10.5344	6.58545	6.58545	6.58545	chr14	78933665	79026077	+	14_79425884_79333473_-92411|21.06|4|8	youxintian_mouse28026	NM_027906	Vwa8	exonic	1698
chr14:78947141-78984302+	0	0	0	0	0	4	0	3	1	6.58545	6.58545	6.58545	6.58545	6.58545	10.5344	6.58545	10.2624	8.94889	chr14	78947140	78984302	+	14_79384109_79346948_-37161|11.29|4|4	youxintian_mouse28026	NM_027906	Vwa8	exonic	620
chr14:78947141-78995163+	0	2	0	0	0	0	0	0	0	6.58545	9.5575	6.58545	6.58545	6.58545	6.58545	6.58545	6.58545	6.58545	chr14	78947140	78995163	+		novel	NM_027906	Vwa8	exonic	867
chr14:78982236-78984302+	0	0	0	1	0	0	2	1	0	6.58545	6.58545	6.58545	9.07415	6.58545	6.58545	9.74562	8.88706	6.58545	chr14	78982235	78984302	+	14_79384109_79382043_-2066|13.92|8|10	youxintian_mouse28026	NM_027906	Vwa8	exonic	275
chr14:78982236-78994568+	0	0	0	0	0	2	0	0	0	6.58545	6.58545	6.58545	6.58545	6.58545	9.62495	6.58545	6.58545	6.58545	chr14	78982235	78994568	+	14_79394375_79382043_-12332|20.12|2|2	youxintian_mouse28026	NM_027906	Vwa8	exonic	444
chr14:78982236-79009279+	0	0	1	0	2	0	1	0	0	6.58545	6.58545	9.44345	6.58545	9.84625	6.58545	8.8986	6.58545	6.58545	chr14	78982235	79009279	+	14_79409086_79382043_-27043|18.02|2|2	youxintian_mouse28026	NM_027906	Vwa8	exonic	638
chr14:78982236-79026077+	0	0	0	0	1	1	0	0	4	6.58545	6.58545	6.58545	6.58545	8.98942	8.79054	6.58545	6.58545	10.7216	chr14	78982235	79026077	+	14_79425884_79382043_-43841|20.14|5|9	youxintian_mouse28026	NM_027906	Vwa8	exonic	924
chr14:78982236-79038201+	0	1	0	0	0	1	0	0	2	6.58545	8.73056	6.58545	6.58545	6.58545	8.79054	6.58545	6.58545	9.80143	chr14	78982235	79038201	+	14_79438008_79382043_-55965|19.26|4|4	youxintian_mouse28026	NM_027906	Vwa8	exonic	1001
chr14:78982236-79056722+	0	0	0	0	0	0	0	0	2	6.58545	6.58545	6.58545	6.58545	6.58545	6.58545	6.58545	6.58545	9.80143	chr14	78982235	79056722	+		novel	NM_027906	Vwa8	exonic	1077
chr14:78994400-79026077+	0	0	0	0	0	2	2	0	0	6.58545	6.58545	6.58545	6.58545	6.58545	9.62495	9.74562	6.58545	6.58545	chr14	78994399	79026077	+	14_79425884_79394207_-31677|24.31|5|6	youxintian_mouse28026	NM_027906	Vwa8	exonic	649
chr14:78994400-79065005+	0	0	0	0	0	0	0	0	0	6.58545	6.58545	6.58545	6.58545	6.58545	6.58545	6.58545	6.58545	6.58545	chr14	78994399	79065005	+		novel	NM_027906	Vwa8	exonic	1416
chr14:79009164-79026077+	4	0	0	0	0	1	2	0	1	10.9103	6.58545	6.58545	6.58545	6.58545	8.79054	9.74562	6.58545	8.94889	chr14	79009163	79026077	+	14_79425884_79408971_-16913|21.24|17|44	youxintian_mouse28026	NM_027906	Vwa8	exonic	402
chr14:79038125-79065005+	0	0	0	2	0	0	0	0	0	6.58545	6.58545	6.58545	9.93954	6.58545	6.58545	6.58545	6.58545	6.58545	chr14	79038124	79065005	+	14_79464812_79437932_-26880|15.77|2|2	youxintian_mouse28026	NM_027906	Vwa8	exonic	767
chr14:79056647-79065005+	1	2	0	0	0	0	0	0	0	9.11153	9.5575	6.58545	6.58545	6.58545	6.58545	6.58545	6.58545	6.58545	chr14	79056646	79065005	+	14_79464812_79456454_-8358|12.13|6|7	youxintian_mouse28026	NM_027906	Vwa8	exonic	690
chr14:79081113-79103696+	0	2	0	0	0	0	0	0	0	6.58545	9.5575	6.58545	6.58545	6.58545	6.58545	6.58545	6.58545	6.58545	chr14	79081112	79103696	+	14_79503503_79480920_-22583|14.43|2|2	youxintian_mouse28026	NM_027906	Vwa8	exonic	1498
chr14:79157072-79164212+	2	0	0	0	0	1	2	0	0	9.98053	6.58545	6.58545	6.58545	6.58545	8.79054	9.74562	6.58545	6.58545	chr14	79157071	79164212	+		novel	NM_027906	Vwa8	exonic	375
chr14:79339534-79341095-	0	0	0	0	0	0	0	0	0	6.58545	6.58545	6.58545	6.58545	6.58545	6.58545	6.58545	6.58545	6.58545	chr14	79339533	79341095	-	14_79740902_79739341_-1561|18.20|6|6	youxintian_mouse28026	NM_025832	Naa16	exonic	352
chr14:79355721-79370097-	0	0	0	0	0	0	0	0	0	6.58545	6.58545	6.58545	6.58545	6.58545	6.58545	6.58545	6.58545	6.58545	chr14	79355720	79370097	-	14_79769904_79755528_-14376|11.65|11|15	youxintian_mouse28026	NM_025832	Naa16	exonic	599
chr14:79536123-79536422+	0	0	0	0	0	0	0	2	0	6.58545	6.58545	6.58545	6.58545	6.58545	6.58545	6.58545	9.73278	6.58545	chr14	79536122	79536422	+		novel	NM_007920	Elf1	exonic	300
chr14:79567150-79573618+	0	1	0	0	1	0	0	2	0	6.58545	8.73056	6.58545	6.58545	8.98942	6.58545	6.58545	9.73278	6.58545	chr14	79567149	79573618	+		novel	NM_007920	Elf1	exonic	889
chr14:79580185-79580789+	0	0	0	0	0	1	0	0	0	6.58545	6.58545	6.58545	6.58545	6.58545	8.79054	6.58545	6.58545	6.58545	chr14	79580184	79580789	+	14_79980596_79979992_-604|13.26|4|4	youxintian_mouse28026	NM_007920	Elf1	sense overlapping	605
chr14:84477323-84477687+	0	0	0	0	0	0	1	2	0	6.58545	6.58545	6.58545	6.58545	6.58545	6.58545	8.8986	9.73278	6.58545	chr14	84477322	84477687	+	14_84877494_84877130_-364|22.08|17|90	youxintian_mouse28026	NM_001013753	Pcdh17	exonic	232
chr14:86810336-86835101-	0	0	0	0	0	0	2	0	0	6.58545	6.58545	6.58545	6.58545	6.58545	6.58545	9.74562	6.58545	6.58545	chr14	86810335	86835101	-		novel	NM_019670	Diap3	exonic	426
chr14:86828992-86866642-	0	0	0	0	0	0	0	2	0	6.58545	6.58545	6.58545	6.58545	6.58545	6.58545	6.58545	9.73278	6.58545	chr14	86828991	86866642	-	14_87266449_87228799_-37650|15.46|3|5	youxintian_mouse28026	NM_019670	Diap3	exonic	660
chr14:86852072-86918864-	0	0	0	0	2	0	0	0	0	6.58545	6.58545	6.58545	6.58545	9.84625	6.58545	6.58545	6.58545	6.58545	chr14	86852071	86918864	-	14_87318671_87251879_-66792|16.87|3|9	youxintian_mouse28026	NM_019670	Diap3	exonic	663
chr14:87457034-87487287+	0	3	0	0	0	0	0	0	4	6.58545	10.0798	6.58545	6.58545	6.58545	6.58545	6.58545	6.58545	10.7216	chr14	87457033	87487287	+	14_87887094_87856841_-30253|21.10|9|12	youxintian_mouse28026	NM_172605	Tdrd3	exonic	1100
chr14:87472076-87474840+	1	1	0	0	0	0	0	3	1	9.11153	8.73056	6.58545	6.58545	6.58545	6.58545	6.58545	10.2624	8.94889	chr14	87472075	87474840	+	14_87874647_87871883_-2764|18.56|10|11	youxintian_mouse28026	NM_172605	Tdrd3	exonic	303
chr14:87472076-87487287+	0	0	0	0	1	0	0	4	0	6.58545	6.58545	6.58545	6.58545	8.98942	6.58545	6.58545	10.649	6.58545	chr14	87472075	87487287	+	mm9_circ_005369	circBase	NM_172605	Tdrd3	exonic	949
chr14:99186481-99211070+	0	0	0	1	1	0	1	0	2	6.58545	6.58545	6.58545	9.07415	8.98942	6.58545	8.8986	6.58545	9.80143	chr14	99186480	99211070	+	14_99610289_99585700_-24589|19.95|15|40	youxintian_mouse28026	NM_029320	Pibf1	exonic	476
chr14:99187718-99221643+	0	0	0	0	0	0	1	3	1	6.58545	6.58545	6.58545	6.58545	6.58545	6.58545	8.8986	10.2624	8.94889	chr14	99187717	99221643	+	14_99620862_99586937_-33925|13.50|2|2	youxintian_mouse28026	NM_029320	Pibf1	exonic	410
chr14:99301381-99303477+	0	0	0	0	0	2	0	0	0	6.58545	6.58545	6.58545	6.58545	6.58545	9.62495	6.58545	6.58545	6.58545	chr14	99301380	99303477	+		novel	NM_009769	Klf5	exonic	934
chr14:99942034-100023168-	0	0	0	0	0	0	0	0	0	6.58545	6.58545	6.58545	6.58545	6.58545	6.58545	6.58545	6.58545	6.58545	chr14	99942033	100023168	-		novel	NM_010636	Klf12	exonic	746
chr14:101840872-101884414+	0	2	0	0	0	0	0	0	0	6.58545	9.5575	6.58545	6.58545	6.58545	6.58545	6.58545	6.58545	6.58545	chr14	101840871	101884414	+		novel	NM_201529	Lmo7	exonic	704
chr14:101884560-101913346+	0	0	0	2	0	0	0	0	0	6.58545	6.58545	6.58545	9.93954	6.58545	6.58545	6.58545	6.58545	6.58545	chr14	101884559	101913346	+		novel	NM_201529	Lmo7	sense overlapping	28787
chr14:101896467-101902369+	0	3	0	1	0	1	2	1	0	6.58545	10.0798	6.58545	9.07415	6.58545	8.79054	9.74562	8.88706	6.58545	chr14	101896466	101902369	+	14_102301586_102295684_-5902|18.72|3|4	youxintian_mouse28026	NM_201529	Lmo7	exonic	1141
chr14:102565486-102570374-	0	0	0	1	0	3	0	0	0	6.58545	6.58545	6.58545	9.07415	6.58545	10.1502	6.58545	6.58545	6.58545	chr14	102565485	102570374	-		novel			intergenic	4889
chr14:103154746-103212729-	0	2	0	0	0	0	0	0	0	6.58545	9.5575	6.58545	6.58545	6.58545	6.58545	6.58545	6.58545	6.58545	chr14	103154745	103212729	-		novel	NM_207215	Mycbp2	exonic	5046
chr14:103155124-103170012-	0	0	0	0	0	0	0	0	0	6.58545	6.58545	6.58545	6.58545	6.58545	6.58545	6.58545	6.58545	6.58545	chr14	103155123	103170012	-		novel	NM_207215	Mycbp2	exonic	1800
chr14:103218641-103218820-	0	0	2	0	0	0	0	0	0	6.58545	6.58545	10.3404	6.58545	6.58545	6.58545	6.58545	6.58545	6.58545	chr14	103218640	103218820	-		novel	ENSMUST00000159855	Mycbp2	intronic	180
chr14:103247747-103314514-	0	0	0	0	0	0	0	0	2	6.58545	6.58545	6.58545	6.58545	6.58545	6.58545	6.58545	6.58545	9.80143	chr14	103247746	103314514	-		novel	NM_207215	Mycbp2	exonic	3038
chr14:103260196-103291362-	0	1	0	0	0	0	0	0	0	6.58545	8.73056	6.58545	6.58545	6.58545	6.58545	6.58545	6.58545	6.58545	chr14	103260195	103291362	-	14_103690579_103659413_-31166|14.58|10|20	youxintian_mouse28026	NM_207215	Mycbp2	exonic	1582
chr14:104503347-104510437-	0	2	0	0	2	1	0	1	1	6.58545	9.5575	6.58545	6.58545	9.84625	8.79054	6.58545	8.88706	8.94889	chr14	104503346	104510437	-	14_104909654_104902564_-7090|15.46|13|32	youxintian_mouse28026	NM_026047	Rnf219	exonic	566
chr14:105116986-105150889-	0	0	0	0	0	0	2	0	0	6.58545	6.58545	6.58545	6.58545	6.58545	6.58545	9.74562	6.58545	6.58545	chr14	105116985	105150889	-		novel	NM_134077	Rbm26	exonic	1727
chr14:105130233-105150889-	0	0	0	0	2	0	0	0	0	6.58545	6.58545	6.58545	6.58545	9.84625	6.58545	6.58545	6.58545	6.58545	chr14	105130232	105150889	-		novel	NM_134077	Rbm26	exonic	1220
chr14:105141196-105153632-	0	0	0	0	0	0	0	2	0	6.58545	6.58545	6.58545	6.58545	6.58545	6.58545	6.58545	9.73278	6.58545	chr14	105141195	105153632	-	14_105552849_105540413_-12436|16.05|3|3	youxintian_mouse28026	NM_134077	Rbm26	exonic	1438
chr14:105287617-105294892+	0	1	0	1	0	3	3	2	3	6.58545	8.73056	6.58545	9.07415	6.58545	10.1502	10.2758	9.73278	10.3337	chr14	105287616	105294892	+	14_105694109_105686834_-7275|18.78|12|14	youxintian_mouse28026	NM_029561	Ndfip2	exonic	391
chr14:105287617-105298127+	0	1	0	3	0	0	0	0	0	6.58545	8.73056	6.58545	10.4767	6.58545	6.58545	6.58545	6.58545	6.58545	chr14	105287616	105298127	+	14_105697344_105686834_-10510|17.39|10|17	youxintian_mouse28026	NM_029561	Ndfip2	exonic	516
chr14:105287617-105304836+	0	0	0	0	0	0	0	0	0	6.58545	6.58545	6.58545	6.58545	6.58545	6.58545	6.58545	6.58545	6.58545	chr14	105287616	105304836	+	14_105704053_105686834_-17219|19.70|2|2	youxintian_mouse28026	NM_029561	Ndfip2	exonic	689
chr14:118594762-118618990-	0	0	0	0	0	2	0	0	0	6.58545	6.58545	6.58545	6.58545	6.58545	9.62495	6.58545	6.58545	6.58545	chr14	118594761	118618990	-		novel	NM_001033336	Abcc4	exonic	1294
chr14:118654150-118669107-	0	0	0	0	0	1	0	0	0	6.58545	6.58545	6.58545	6.58545	6.58545	8.79054	6.58545	6.58545	6.58545	chr14	118654149	118669107	-	14_119068329_119053372_-14957|18.75|7|13	youxintian_mouse28026	NM_001033336	Abcc4	exonic	457
chr14:119026422-119044591-	0	0	0	0	0	0	0	0	2	6.58545	6.58545	6.58545	6.58545	6.58545	6.58545	6.58545	6.58545	9.80143	chr14	119026421	119044591	-		novel	NM_001081252	Uggt2	exonic	1025
chr14:120324794-120325412+	3	4	1	3	0	0	4	4	1	10.519	10.4625	9.44345	10.4767	6.58545	6.58545	10.6626	10.649	8.94889	chr14	120324793	120325412	+	14_120724634_120724016_-618|16.50|17|64	youxintian_mouse28026	NM_175341	Mbnl2	exonic	619
chr14:120379150-120379314+	0	0	0	0	0	1	2	0	0	6.58545	6.58545	6.58545	6.58545	6.58545	8.79054	9.74562	6.58545	6.58545	chr14	120379149	120379314	+		novel	NM_175341	Mbnl2	exonic	165
chr14:120429462-120429701+	0	0	0	0	0	0	0	0	2	6.58545	6.58545	6.58545	6.58545	6.58545	6.58545	6.58545	6.58545	9.80143	chr14	120429461	120429701	+		novel	NM_175341	Mbnl2	sense overlapping	240
chr14:120917356-120923585+	0	3	0	1	0	1	0	0	0	6.58545	10.0798	6.58545	9.07415	6.58545	8.79054	6.58545	6.58545	6.58545	chr14	120917355	120923585	+	14_121322807_121316578_-6229|20.45|10|18	youxintian_mouse28026	NM_023579	Ipo5	exonic	579
chr14:121101989-121102182+	0	2	0	0	0	0	1	0	0	6.58545	9.5575	6.58545	6.58545	6.58545	6.58545	8.8986	6.58545	6.58545	chr14	121101988	121102182	+	14_121501404_121501211_-193|15.30|4|4	youxintian_mouse28026	NM_134082	Farp1	exonic	194
chr14:121161136-121171929+	0	0	0	0	0	0	2	0	0	6.58545	6.58545	6.58545	6.58545	6.58545	6.58545	9.74562	6.58545	6.58545	chr14	121161135	121171929	+		novel	ENSMUST00000026635	Farp1	intronic	10794
chr14:121905123-121908320+	0	0	0	1	4	0	0	0	0	6.58545	6.58545	6.58545	9.07415	10.769	6.58545	6.58545	6.58545	6.58545	chr14	121905122	121908320	+	mm9_circ_010355	circBase	NM_026861	Ubac2	exonic	358
chr14:122133280-122139774+	0	0	1	0	0	2	0	0	0	6.58545	6.58545	9.44345	6.58545	6.58545	9.62495	6.58545	6.58545	6.58545	chr14	122133279	122139774	+	14_122538996_122532502_-6494|17.03|17|43	youxintian_mouse28026	NM_080556	Tm9sf2	exonic	383
chr14:122137501-122139648+	0	0	0	0	2	0	0	0	0	6.58545	6.58545	6.58545	6.58545	9.84625	6.58545	6.58545	6.58545	6.58545	chr14	122137500	122139648	+		novel	ENSMUST00000171318	Tm9sf2	intronic	2148
chr14:122582617-122616885+	0	2	0	0	0	0	0	0	0	6.58545	9.5575	6.58545	6.58545	6.58545	6.58545	6.58545	6.58545	6.58545	chr14	122582616	122616885	+		novel	NM_144844	Pcca	exonic	300
chr15:3457930-3551685-	0	2	0	0	1	0	2	1	0	6.58545	9.5575	6.58545	6.58545	8.98942	6.58545	9.74562	8.88706	6.58545	chr15	3457929	3551685	-	15_3501685_3407930_-93755|16.69|6|26	youxintian_mouse28026	ENSMUST00000160343	Ghr	intronic	93756
chr15:4035260-4059996+	0	0	0	0	3	0	0	0	1	6.58545	6.58545	6.58545	6.58545	10.3801	6.58545	6.58545	6.58545	8.94889	chr15	4035259	4059996	+	15_4009996_3985260_-24736|17.64|16|39	youxintian_mouse28026	NM_024188	Oxct1	exonic	654
chr15:5160847-5161915+	0	0	0	0	0	0	0	0	0	6.58545	6.58545	6.58545	6.58545	6.58545	6.58545	6.58545	6.58545	6.58545	chr15	5160846	5161915	+		novel	ENSMUST00000051186	Prkaa1	intronic	1069
chr15:6836916-6842917-	0	0	0	0	0	0	0	0	0	6.58545	6.58545	6.58545	6.58545	6.58545	6.58545	6.58545	6.58545	6.58545	chr15	6836915	6842917	-	15_6792917_6786916_-6001|13.66|6|6	youxintian_mouse28026	NM_011019	Osmr	exonic	582
chr15:7154387-7169266+	0	0	0	0	0	0	0	0	2	6.58545	6.58545	6.58545	6.58545	6.58545	6.58545	6.58545	6.58545	9.80143	chr15	7154386	7169266	+		novel	NM_013584	Lifr	exonic	998
chr15:8019589-8079364-	0	0	0	0	0	0	0	1	0	6.58545	6.58545	6.58545	6.58545	6.58545	6.58545	6.58545	8.88706	6.58545	chr15	8019588	8079364	-	15_8029364_7969589_-59775|16.37|9|12	youxintian_mouse28026	NM_001081402	Wdr70	exonic	630
chr15:8139851-8141359+	0	1	0	0	0	0	1	0	0	6.58545	8.73056	6.58545	6.58545	6.58545	6.58545	8.8986	6.58545	6.58545	chr15	8139850	8141359	+	mm9_circ_001790	circBase	NM_133227	Nup155	exonic	229
chr15:10486453-10492863+	0	0	0	0	0	2	0	0	0	6.58545	6.58545	6.58545	6.58545	6.58545	9.62495	6.58545	6.58545	6.58545	chr15	10486452	10492863	+		novel	NM_011232	Rad1	exonic	731
chr15:11394277-11397261-	0	0	0	0	0	2	0	0	0	6.58545	6.58545	6.58545	6.58545	6.58545	9.62495	6.58545	6.58545	6.58545	chr15	11394276	11397261	-		novel	NM_033074	Tars	sense overlapping	2985
chr15:12136396-12140652+	0	0	0	0	0	1	1	0	0	6.58545	6.58545	6.58545	6.58545	6.58545	8.79054	8.8986	6.58545	6.58545	chr15	12136395	12140652	+	15_12070407_12066151_-4256|14.26|3|4	youxintian_mouse28026	NM_011767	Zfr	exonic	647
chr15:12159599-12160690+	0	0	0	0	0	0	0	1	3	6.58545	6.58545	6.58545	6.58545	6.58545	6.58545	6.58545	8.88706	10.3337	chr15	12159598	12160690	+	mm9_circ_014483	circBase	NM_011767	Zfr	exonic	369
chr15:12236018-12238019+	0	1	0	2	0	2	0	0	0	6.58545	8.73056	6.58545	9.93954	6.58545	9.62495	6.58545	6.58545	6.58545	chr15	12236017	12238019	+	15_12167774_12165773_-2001|14.58|11|15	youxintian_mouse28026	NM_172958	Mtmr12	exonic	222
chr15:12251353-12259646+	0	0	0	0	0	0	0	0	0	6.58545	6.58545	6.58545	6.58545	6.58545	6.58545	6.58545	6.58545	6.58545	chr15	12251352	12259646	+		novel	NM_172958	Mtmr12	exonic	387
chr15:26763393-26789602-	0	0	0	0	0	0	0	0	0	6.58545	6.58545	6.58545	6.58545	6.58545	6.58545	6.58545	6.58545	6.58545	chr15	26763392	26789602	-		novel	NM_176959	Fbxl7	sense overlapping	26210
chr15:27881307-27912734-	0	0	0	0	0	0	0	2	0	6.58545	6.58545	6.58545	6.58545	6.58545	6.58545	6.58545	9.73278	6.58545	chr15	27881306	27912734	-	15_27842489_27811062_-31427|19.42|4|5	youxintian_mouse28026	NM_001081302	Trio	exonic	1622
chr15:32269683-32271404+	2	0	0	0	1	2	0	1	1	9.98053	6.58545	6.58545	6.58545	8.98942	9.62495	6.58545	8.88706	8.94889	chr15	32269682	32271404	+	15_32201159_32199438_-1721|18.24|4|6	youxintian_mouse28026	ENSMUST00000067458	Sema5a	intronic	1722
chr15:32269683-32271475+	0	0	0	0	3	0	1	0	0	6.58545	6.58545	6.58545	6.58545	10.3801	6.58545	8.8986	6.58545	6.58545	chr15	32269682	32271475	+	15_32201230_32199438_-1792|19.53|3|3	youxintian_mouse28026	ENSMUST00000067458	Sema5a	intronic	1793
chr15:32269683-32273921+	0	2	0	0	0	0	0	0	0	6.58545	9.5575	6.58545	6.58545	6.58545	6.58545	6.58545	6.58545	6.58545	chr15	32269682	32273921	+	15_32203676_32199438_-4238|23.91|2|2	youxintian_mouse28026	ENSMUST00000067458	Sema5a	intronic	4239
chr15:33249926-33302547+	0	1	1	1	1	2	0	0	2	6.58545	8.73056	9.44345	9.07415	8.98942	9.62495	6.58545	6.58545	9.80143	chr15	33249925	33302547	+	15_33232302_33179681_-52621|16.51|3|6	youxintian_mouse28026	NM_018755	Cpq	exonic	416
chr15:34114024-34123766+	0	0	1	0	0	2	1	0	0	6.58545	6.58545	9.44345	6.58545	6.58545	9.62495	8.8986	6.58545	6.58545	chr15	34114023	34123766	+	15_34053521_34043779_-9742|12.19|7|15	youxintian_mouse28026	NM_026002	Mtdh	exonic	658
chr15:35072430-35115645-	0	0	0	0	0	2	0	0	0	6.58545	6.58545	6.58545	6.58545	6.58545	9.62495	6.58545	6.58545	6.58545	chr15	35072429	35115645	-	mm9_circ_009223	circBase	NM_019635	Stk3	exonic	658
chr15:35099434-35115645-	0	4	0	1	1	0	0	1	4	6.58545	10.4625	6.58545	9.07415	8.98942	6.58545	6.58545	8.88706	10.7216	chr15	35099433	35115645	-	mm9_circ_003167	circBase	NM_019635	Stk3	exonic	325
chr15:35417511-35423297+	0	1	0	0	0	2	0	0	0	6.58545	8.73056	6.58545	6.58545	6.58545	9.62495	6.58545	6.58545	6.58545	chr15	35417510	35423297	+	mm9_circ_011859	circBase	NM_177151	Vps13b	exonic	471
chr15:35417511-35430284+	0	0	1	1	0	1	0	1	0	6.58545	6.58545	9.44345	9.07415	6.58545	8.79054	6.58545	8.88706	6.58545	chr15	35417510	35430284	+	15_35360039_35347266_-12773|15.08|11|19	youxintian_mouse28026	NM_177151	Vps13b	exonic	646
chr15:35417511-35456739+	0	0	0	0	0	0	0	0	0	6.58545	6.58545	6.58545	6.58545	6.58545	6.58545	6.58545	6.58545	6.58545	chr15	35417510	35456739	+		novel	NM_177151	Vps13b	exonic	2039
chr15:35448530-35491217+	0	0	0	0	0	0	0	0	2	6.58545	6.58545	6.58545	6.58545	6.58545	6.58545	6.58545	6.58545	9.80143	chr15	35448529	35491217	+		novel	NM_177151	Vps13b	sense overlapping	42688
chr15:35533296-35534360+	0	0	0	0	0	0	0	1	0	6.58545	6.58545	6.58545	6.58545	6.58545	6.58545	6.58545	8.88706	6.58545	chr15	35533295	35534360	+	15_35464115_35463051_-1064|17.69|15|52	youxintian_mouse28026	NM_177151	Vps13b	exonic	309
chr15:35533296-35576526+	2	2	0	0	1	0	0	0	0	9.98053	9.5575	6.58545	6.58545	8.98942	6.58545	6.58545	6.58545	6.58545	chr15	35533295	35576526	+	15_35506281_35463051_-43230|14.48|13|32	youxintian_mouse28026	NM_177151	Vps13b	exonic	567
chr15:35576382-35674952+	0	0	0	0	0	0	2	0	0	6.58545	6.58545	6.58545	6.58545	6.58545	6.58545	9.74562	6.58545	6.58545	chr15	35576381	35674952	+		novel	NM_177151	Vps13b	sense overlapping	98571
chr15:35616040-35709813+	0	0	0	0	0	0	0	0	2	6.58545	6.58545	6.58545	6.58545	6.58545	6.58545	6.58545	6.58545	9.80143	chr15	35616039	35709813	+		novel	NM_177151	Vps13b	sense overlapping	93774
chr15:35668701-35674952+	2	2	0	0	0	2	0	1	0	9.98053	9.5575	6.58545	6.58545	6.58545	9.62495	6.58545	8.88706	6.58545	chr15	35668700	35674952	+	15_35604707_35598456_-6251|17.44|11|16	youxintian_mouse28026	NM_177151	Vps13b	exonic	475
chr15:36080817-36122332-	0	0	0	0	0	0	0	0	2	6.58545	6.58545	6.58545	6.58545	6.58545	6.58545	6.58545	6.58545	9.80143	chr15	36080816	36122332	-		novel	NM_001195748	Rgs22	exonic	2094
chr15:37270590-37291672+	0	0	0	0	0	0	0	0	0	6.58545	6.58545	6.58545	6.58545	6.58545	6.58545	6.58545	6.58545	6.58545	chr15	37270589	37291672	+		novel	NM_026496	Grhl2	exonic	983
chr15:37287242-37291672+	0	0	1	4	0	0	0	0	0	6.58545	6.58545	9.44345	10.8672	6.58545	6.58545	6.58545	6.58545	6.58545	chr15	37287241	37291672	+		novel	NM_026496	Grhl2	exonic	325
chr15:38037816-38048149-	0	0	0	0	0	0	0	2	0	6.58545	6.58545	6.58545	6.58545	6.58545	6.58545	6.58545	9.73278	6.58545	chr15	38037815	38048149	-	15_37977904_37967571_-10333|16.10|5|7	youxintian_mouse28026	NM_001081359	Ubr5	exonic	1036
chr15:38045693-38048149-	1	2	0	0	0	0	0	0	0	9.11153	9.5575	6.58545	6.58545	6.58545	6.58545	6.58545	6.58545	6.58545	chr15	38045692	38048149	-	mm9_circ_018658	circBase	NM_001081359	Ubr5	exonic	324
chr15:38493474-38498841-	1	2	0	0	0	1	0	3	0	9.11153	9.5575	6.58545	6.58545	6.58545	8.79054	6.58545	10.2624	6.58545	chr15	38493473	38498841	-	15_38428596_38423229_-5367|17.08|12|24	youxintian_mouse28026	NM_018745	Azin1	exonic	628
chr15:39274976-39345620+	0	0	0	0	0	0	0	2	0	6.58545	6.58545	6.58545	6.58545	6.58545	6.58545	6.58545	9.73278	6.58545	chr15	39274975	39345620	+	15_39177166_39106522_-70644|15.64|8|14	youxintian_mouse28026	NM_053271	Rims2	exonic	642
chr15:39292102-39345620+	0	0	0	0	0	0	0	0	2	6.58545	6.58545	6.58545	6.58545	6.58545	6.58545	6.58545	6.58545	9.80143	chr15	39292101	39345620	+	15_39177166_39123648_-53518|21.05|16|46	youxintian_mouse28026	NM_053271	Rims2	exonic	522
chr15:39566943-39616510+	0	1	1	0	1	0	0	5	0	6.58545	8.73056	9.44345	6.58545	8.98942	6.58545	6.58545	10.9535	6.58545	chr15	39566942	39616510	+	mm9_circ_011266	circBase	NM_053271	Rims2	exonic	516
chr15:40670517-40670683+	0	0	0	0	2	0	0	0	0	6.58545	6.58545	6.58545	6.58545	9.84625	6.58545	6.58545	6.58545	6.58545	chr15	40670516	40670683	+		novel	ENSMUST00000053467	Zfpm2	intronic	167
chr15:40752896-40774146+	0	0	0	0	2	0	0	0	0	6.58545	6.58545	6.58545	6.58545	9.84625	6.58545	6.58545	6.58545	6.58545	chr15	40752895	40774146	+	mm9_circ_002584	circBase	NM_011766	Zfpm2	exonic	261
chr15:41797474-41826052+	2	1	0	0	0	2	1	1	2	9.98053	8.73056	6.58545	6.58545	6.58545	9.62495	8.8986	8.88706	9.80143	chr15	41797473	41826052	+	15_41657598_41629020_-28578|19.04|23|316	youxintian_mouse28026	NM_130885	Oxr1	exonic	1715
chr15:44380060-44420873-	0	0	0	3	0	0	0	0	0	6.58545	6.58545	6.58545	10.4767	6.58545	6.58545	6.58545	6.58545	6.58545	chr15	44380059	44420873	-	15_44252419_44211606_-40813|12.24|7|14	youxintian_mouse28026	NM_026149	Nudcd1	exonic	1341
chr15:55149341-55151911+	0	0	1	0	1	1	2	0	0	6.58545	6.58545	9.44345	6.58545	8.98942	8.79054	9.74562	6.58545	6.58545	chr15	55149340	55151911	+	15_54983466_54980896_-2570|18.45|5|6	youxintian_mouse28026	NM_145470	Deptor	exonic	303
chr15:55208731-55218273+	0	3	0	1	4	1	0	0	1	6.58545	10.0798	6.58545	9.07415	10.769	8.79054	6.58545	6.58545	8.94889	chr15	55208730	55218273	+	15_55049828_55040286_-9542|16.07|7|21	youxintian_mouse28026	NM_145470	Deptor	exonic	497
chr15:57821032-57823751+	0	0	0	0	0	0	0	0	0	6.58545	6.58545	6.58545	6.58545	6.58545	6.58545	6.58545	6.58545	6.58545	chr15	57821031	57823751	+		novel	NM_199449	Zhx2	exonic	2720
chr15:58052224-58055082-	0	2	0	0	1	0	0	0	0	6.58545	9.5575	6.58545	6.58545	8.98942	6.58545	6.58545	6.58545	6.58545	chr15	58052223	58055082	-	15_57886637_57883779_-2858|16.47|13|34	youxintian_mouse28026	NM_009572	Zhx1	exonic	2859
chr15:58052224-58064180-	0	2	0	1	0	0	0	0	0	6.58545	9.5575	6.58545	9.07415	6.58545	6.58545	6.58545	6.58545	6.58545	chr15	58052223	58064180	-	15_57895735_57883779_-11956|17.49|10|20	youxintian_mouse28026	NM_001042438	Zhx1	exonic	2985
chr15:58104431-58106911-	0	2	0	0	0	0	0	0	0	6.58545	9.5575	6.58545	6.58545	6.58545	6.58545	6.58545	6.58545	6.58545	chr15	58104430	58106911	-	15_57938466_57935986_-2480|19.13|7|7	youxintian_mouse28026	NM_027435	Atad2	exonic	509
chr15:58116768-58122602-	0	0	0	0	0	1	0	1	0	6.58545	6.58545	6.58545	6.58545	6.58545	8.79054	6.58545	8.88706	6.58545	chr15	58116767	58122602	-	15_57954157_57948323_-5834|17.33|2|2	youxintian_mouse28026	NM_027435	Atad2	exonic	598
chr15:58542120-58553718+	0	0	0	0	0	2	0	0	0	6.58545	6.58545	6.58545	6.58545	6.58545	9.62495	6.58545	6.58545	6.58545	chr15	58542119	58553718	+		novel	ENSMUST00000161028	Fer1l6	exonic	451
chr15:58782280-58797245-	2	0	0	0	0	0	0	0	0	9.98053	6.58545	6.58545	6.58545	6.58545	6.58545	6.58545	6.58545	6.58545	chr15	58782279	58797245	-	15_58628800_58613835_-14965|18.00|3|3	youxintian_mouse28026	NM_175212	Tmem65	sense overlapping	14966
chr15:62107148-62107465+	4	9	0	2	8	1	6	2	3	10.9103	11.5768	6.58545	9.93954	11.7287	8.79054	11.2188	9.73278	10.3337	chr15	62107147	62107465	+	mm9_circ_011235	circBase	NR_003368	Pvt1	exonic	318
chr15:62175467-62175926+	0	0	0	0	2	0	0	0	0	6.58545	6.58545	6.58545	6.58545	9.84625	6.58545	6.58545	6.58545	6.58545	chr15	62175466	62175926	+	15_62007481_62007022_-459|15.35|6|8	Guojunjie2014_mouse635	uc007vyk.1	Pvt1	exonic	181
chr15:63935579-63957667-	0	0	0	0	0	0	2	0	0	6.58545	6.58545	6.58545	6.58545	6.58545	6.58545	9.74562	6.58545	6.58545	chr15	63935578	63957667	-		novel	NM_144846	Fam49b	sense overlapping	22089
chr15:64088823-64089036-	0	0	0	0	0	0	0	0	2	6.58545	6.58545	6.58545	6.58545	6.58545	6.58545	6.58545	6.58545	9.80143	chr15	64088822	64089036	-		novel	NM_010026	Asap1	sense overlapping	214
chr15:64102403-64111076-	0	0	0	0	0	0	0	2	0	6.58545	6.58545	6.58545	6.58545	6.58545	6.58545	6.58545	9.73278	6.58545	chr15	64102402	64111076	-		novel	NM_010026	Asap1	exonic	241
chr15:64149606-64167829-	0	0	0	0	0	0	0	0	0	6.58545	6.58545	6.58545	6.58545	6.58545	6.58545	6.58545	6.58545	6.58545	chr15	64149605	64167829	-		novel	NM_010026	Asap1	exonic	595
chr15:65861652-65867319+	0	0	0	0	0	0	0	0	0	6.58545	6.58545	6.58545	6.58545	6.58545	6.58545	6.58545	6.58545	6.58545	chr15	65861651	65867319	+		novel	NM_133766	Efr3a	exonic	295
chr15:66594807-66595199+	2	0	0	0	0	0	0	0	0	9.98053	6.58545	6.58545	6.58545	6.58545	6.58545	6.58545	6.58545	6.58545	chr15	66594806	66595199	+	15_66426761_66426369_-392|10.98|16|26	youxintian_mouse28026	NM_001081409	Phf20l1	exonic	257
chr15:66604027-66637032+	0	0	0	0	0	2	0	0	0	6.58545	6.58545	6.58545	6.58545	6.58545	9.62495	6.58545	6.58545	6.58545	chr15	66604026	66637032	+	15_66468594_66435589_-33005|11.39|5|9	youxintian_mouse28026	NM_001081409	Phf20l1	exonic	2229
chr15:66921710-66922551+	0	0	0	0	0	0	0	0	0	6.58545	6.58545	6.58545	6.58545	6.58545	6.58545	6.58545	6.58545	6.58545	chr15	66921709	66922551	+		novel	NM_018865	Wisp1	sense overlapping	842
chr15:68165753-68170223-	0	0	0	0	0	0	0	0	0	6.58545	6.58545	6.58545	6.58545	6.58545	6.58545	6.58545	6.58545	6.58545	chr15	68165752	68170223	-	mm9_circ_009299	circBase	NM_198644	Zfat	exonic	412
chr15:72999972-73031643-	0	1	0	0	1	2	1	0	0	6.58545	8.73056	6.58545	6.58545	8.98942	9.62495	8.8986	6.58545	6.58545	chr15	72999971	73031643	-	15_72862073_72830402_-31671|23.47|20|53	youxintian_mouse28026	NM_029640	Trappc9	exonic	609
chr15:72999972-73042203-	0	0	0	0	0	0	0	0	0	6.58545	6.58545	6.58545	6.58545	6.58545	6.58545	6.58545	6.58545	6.58545	chr15	72999971	73042203	-		novel	NM_029640	Trappc9	exonic	636
chr15:73012806-73031643-	0	0	0	0	0	0	3	0	0	6.58545	6.58545	6.58545	6.58545	6.58545	6.58545	10.2758	6.58545	6.58545	chr15	73012805	73031643	-	mm9_circ_006827	circBase	NM_029640	Trappc9	exonic	465
chr15:73121064-73138113-	0	2	0	0	0	0	0	0	0	6.58545	9.5575	6.58545	6.58545	6.58545	6.58545	6.58545	6.58545	6.58545	chr15	73121063	73138113	-		novel	NM_153178	Ago2	exonic	1373
chr15:73320775-73343359-	0	0	0	0	0	1	1	0	0	6.58545	6.58545	6.58545	6.58545	6.58545	8.79054	8.8986	6.58545	6.58545	chr15	73320774	73343359	-	15_73173789_73151205_-22584|19.29|17|51	youxintian_mouse28026	NM_007982	Ptk2	exonic	625
chr15:73391759-73394744-	0	2	0	0	0	1	1	2	0	6.58545	9.5575	6.58545	6.58545	6.58545	8.79054	8.8986	9.73278	6.58545	chr15	73391758	73394744	-	mm9_circ_004905	circBase	uc007wca.1	Ptk2	exonic	323
chr15:76047922-76048138-	0	0	0	0	0	0	0	0	0	6.58545	6.58545	6.58545	6.58545	6.58545	6.58545	6.58545	6.58545	6.58545	chr15	76047921	76048138	-		novel	NM_134089	Scrib	sense overlapping	217
chr15:77791716-77794283-	0	0	0	0	3	1	0	0	0	6.58545	6.58545	6.58545	6.58545	10.3801	8.79054	6.58545	6.58545	6.58545	chr15	77791715	77794283	-		novel	NM_022410	Myh9	sense overlapping	2568
chr15:77807868-77813231-	0	0	0	0	0	0	3	0	1	6.58545	6.58545	6.58545	6.58545	6.58545	6.58545	10.2758	6.58545	8.94889	chr15	77807867	77813231	-	15_77643661_77638298_-5363|18.59|5|7	youxintian_mouse28026	NM_022410	Myh9	exonic	509
chr15:78259943-78261037+	0	0	0	0	0	0	0	0	0	6.58545	6.58545	6.58545	6.58545	6.58545	6.58545	6.58545	6.58545	6.58545	chr15	78259942	78261037	+		novel	NM_008677	Ncf4	sense overlapping	1095
chr15:78296976-78298378-	0	1	1	0	0	0	0	0	0	6.58545	8.73056	9.44345	6.58545	6.58545	6.58545	6.58545	6.58545	6.58545	chr15	78296975	78298378	-		novel	NM_007781	Csf2rb2	exonic	364
chr15:79033931-79037301+	0	0	0	0	0	0	0	0	0	6.58545	6.58545	6.58545	6.58545	6.58545	6.58545	6.58545	6.58545	6.58545	chr15	79033930	79037301	+		novel	NM_013847	Gcat	sense overlapping	3371
chr15:79114655-79115171+	1	0	0	0	1	0	0	0	0	9.11153	6.58545	6.58545	6.58545	8.98942	6.58545	6.58545	6.58545	6.58545	chr15	79114654	79115171	+	mm9_circ_011505	circBase	NM_177461	Micall1	exonic	191
chr15:79369670-79374184-	0	0	0	0	0	0	0	0	0	6.58545	6.58545	6.58545	6.58545	6.58545	6.58545	6.58545	6.58545	6.58545	chr15	79369669	79374184	-		novel	NM_172608	Tmem184b	sense overlapping	4515
chr15:79536997-79537545-	0	0	3	0	0	1	1	2	0	6.58545	6.58545	10.8892	6.58545	6.58545	8.79054	8.8986	9.73278	6.58545	chr15	79536996	79537545	-	15_79367975_79367427_-548|13.74|26|148	youxintian_mouse28026	NM_199079	Ddx17	exonic	173
chr15:79541034-79542586-	0	0	0	0	0	0	1	0	0	6.58545	6.58545	6.58545	6.58545	6.58545	6.58545	8.8986	6.58545	6.58545	chr15	79541033	79542586	-	15_79373016_79371464_-1552|16.31|10|14	youxintian_mouse28026	NM_199079	Ddx17	exonic	234
chr15:79541034-79543856-	1	0	2	0	1	0	0	0	1	9.11153	6.58545	10.3404	6.58545	8.98942	6.58545	6.58545	6.58545	8.94889	chr15	79541033	79543856	-	mm9_circ_011064	circBase	NM_199079	Ddx17	exonic	385
chr15:79542487-79543856-	0	0	0	0	0	0	0	0	0	6.58545	6.58545	6.58545	6.58545	6.58545	6.58545	6.58545	6.58545	6.58545	chr15	79542486	79543856	-	15_79374286_79372917_-1369|21.03|9|12	youxintian_mouse28026	NM_199079	Ddx17	exonic	251
chr15:79636679-79643371-	0	0	0	0	0	0	0	0	0	6.58545	6.58545	6.58545	6.58545	6.58545	6.58545	6.58545	6.58545	6.58545	chr15	79636678	79643371	-		novel	NM_029407	Fam227a	exonic	666
chr15:81382980-81396174-	0	0	0	0	0	0	0	0	2	6.58545	6.58545	6.58545	6.58545	6.58545	6.58545	6.58545	6.58545	9.80143	chr15	81382979	81396174	-	15_81226604_81213410_-13194|14.52|4|4	youxintian_mouse28026	NM_133726	St13	sense overlapping	13195
chr15:81430690-81438180+	0	0	0	0	0	1	0	0	0	6.58545	6.58545	6.58545	6.58545	6.58545	8.79054	6.58545	6.58545	6.58545	chr15	81430689	81438180	+	15_81268610_81261120_-7490|15.62|14|23	youxintian_mouse28026	NM_177310	Xpnpep3	exonic	380
chr15:81620000-81628737+	0	0	0	0	0	0	0	0	0	6.58545	6.58545	6.58545	6.58545	6.58545	6.58545	6.58545	6.58545	6.58545	chr15	81619999	81628737	+		novel	NM_177821	Ep300	exonic	1376
chr15:81628293-81628737+	0	1	0	0	1	0	0	2	0	6.58545	8.73056	6.58545	6.58545	8.98942	6.58545	6.58545	9.73278	6.58545	chr15	81628292	81628737	+	mm9_circ_005365	circBase	NM_177821	Ep300	exonic	325
chr15:81631614-81632512+	0	2	1	1	0	2	1	0	2	6.58545	9.5575	9.44345	9.07415	6.58545	9.62495	8.8986	6.58545	9.80143	chr15	81631613	81632512	+	mm9_circ_008242	circBase	NM_177821	Ep300	exonic	329
chr15:81636178-81639047+	0	0	0	0	2	0	0	0	0	6.58545	6.58545	6.58545	6.58545	9.84625	6.58545	6.58545	6.58545	6.58545	chr15	81636177	81639047	+	15_81469477_81466608_-2869|18.30|3|3	youxintian_mouse28026	NM_177821	Ep300	exonic	203
chr15:81716567-81722026-	0	0	0	0	0	0	0	0	0	6.58545	6.58545	6.58545	6.58545	6.58545	6.58545	6.58545	6.58545	6.58545	chr15	81716566	81722026	-	15_81552456_81546997_-5459|13.19|7|9	youxintian_mouse28026	NM_011241	Rangap1	exonic	503
chr15:82175097-82185433+	0	0	0	0	2	0	0	0	0	6.58545	6.58545	6.58545	6.58545	9.84625	6.58545	6.58545	6.58545	6.58545	chr15	82175096	82185433	+	15_82015863_82005527_-10336|13.84|3|5	youxintian_mouse28026	NM_033218	Srebf2	exonic	1341
chr15:82825231-82857284-	3	5	3	1	5	12	5	1	2	10.519	10.7647	10.8892	9.07415	11.0749	12.0557	10.9673	8.88706	9.80143	chr15	82825230	82857284	-	mm9_circ_000890	circBase	NM_013836	Tcf20	exonic	5866
chr15:82851513-82857284-	3	6	4	6	10	13	7	5	2	10.519	11.0144	11.2859	11.4272	12.0424	12.1687	11.4328	10.9535	9.80143	chr15	82851512	82857284	-	mm9_circ_001424	circBase	NM_013836	Tcf20	exonic	5772
chr15:83327150-83327316-	0	0	0	0	0	0	0	2	0	6.58545	6.58545	6.58545	6.58545	6.58545	6.58545	6.58545	9.73278	6.58545	chr15	83327149	83327316	-		novel	uc007xah.1	Arfgap3	intronic	167
chr15:84195744-84198661+	0	0	0	0	0	0	2	0	0	6.58545	6.58545	6.58545	6.58545	6.58545	6.58545	9.74562	6.58545	6.58545	chr15	84195743	84198661	+	15_84029091_84026174_-2917|21.02|3|5	youxintian_mouse28026	NM_178614	Samm50	exonic	301
chr15:85250577-85250731+	0	0	0	0	0	0	0	0	0	6.58545	6.58545	6.58545	6.58545	6.58545	6.58545	6.58545	6.58545	6.58545	chr15	85250576	85250731	+		novel	ENSMUST00000057410	Fbln1	intronic	155
chr15:85359454-85393506+	0	0	0	0	2	0	0	0	0	6.58545	6.58545	6.58545	6.58545	9.84625	6.58545	6.58545	6.58545	6.58545	chr15	85359453	85393506	+	mm9_circ_007369	circBase	NM_016843	Atxn10	exonic	1057
chr15:85376622-85382984+	0	0	0	0	0	0	0	2	0	6.58545	6.58545	6.58545	6.58545	6.58545	6.58545	6.58545	9.73278	6.58545	chr15	85376621	85382984	+		novel	NM_016843	Atxn10	sense overlapping	6363
chr15:85693537-85694980+	0	0	0	0	0	0	0	0	0	6.58545	6.58545	6.58545	6.58545	6.58545	6.58545	6.58545	6.58545	6.58545	chr15	85693536	85694980	+		novel	TCONS_00010862	XLOC_008220	exonic	148
chr15:85693537-85704290+	0	0	0	0	0	1	2	0	0	6.58545	6.58545	6.58545	6.58545	6.58545	8.79054	9.74562	6.58545	6.58545	chr15	85693536	85704290	+	15_85534720_85523967_-10753|19.15|2|2	youxintian_mouse28026	NR_110483	Mirlet7bhg	sense overlapping	10754
chr15:85882674-85885192+	0	0	0	0	1	2	0	0	1	6.58545	6.58545	6.58545	6.58545	8.98942	9.62495	6.58545	6.58545	8.94889	chr15	85882673	85885192	+	15_85715622_85713104_-2518|20.32|13|22	youxintian_mouse28026	NM_028063	Trmu	exonic	273
chr15:85937844-85941274-	0	0	0	0	0	0	0	2	0	6.58545	6.58545	6.58545	6.58545	6.58545	6.58545	6.58545	9.73278	6.58545	chr15	85937843	85941274	-		novel	NM_009886	Celsr1	exonic	615
chr15:86091313-86100900+	0	0	0	0	0	0	0	0	0	6.58545	6.58545	6.58545	6.58545	6.58545	6.58545	6.58545	6.58545	6.58545	chr15	86091312	86100900	+	15_85931330_85921743_-9587|17.24|5|9	youxintian_mouse28026	NM_172611	Gramd4	exonic	332
chr15:88716906-88730704-	0	0	0	0	0	0	0	0	0	6.58545	6.58545	6.58545	6.58545	6.58545	6.58545	6.58545	6.58545	6.58545	chr15	88716905	88730704	-		novel	NM_001033274	Brd1	exonic	1538
chr15:88811297-88812159-	0	6	2	2	4	4	4	1	4	6.58545	11.0144	10.3404	9.93954	10.769	10.5344	10.6626	8.88706	10.7216	chr15	88811296	88812159	-	mm9_circ_017350	circBase	NM_001142357	Alg12	exonic	328
chr15:89094137-89096819+	0	0	0	0	0	2	2	0	0	6.58545	6.58545	6.58545	6.58545	6.58545	9.62495	9.74562	6.58545	6.58545	chr15	89094136	89096819	+	15_88927249_88924567_-2682|16.62|10|18	youxintian_mouse28026	NM_027905	Selo	exonic	599
chr15:89501404-89521373+	0	0	0	0	0	0	0	0	0	6.58545	6.58545	6.58545	6.58545	6.58545	6.58545	6.58545	6.58545	6.58545	chr15	89501403	89521373	+		novel	NM_021423	Shank3	exonic	1034
chr15:89521103-89533454+	0	0	0	0	0	0	0	0	0	6.58545	6.58545	6.58545	6.58545	6.58545	6.58545	6.58545	6.58545	6.58545	chr15	89521102	89533454	+		novel	NM_021423	Shank3	exonic	1077
chr15:90991710-90995633-	0	0	0	0	2	0	0	0	0	6.58545	6.58545	6.58545	6.58545	9.84625	6.58545	6.58545	6.58545	6.58545	chr15	90991709	90995633	-	15_90826064_90822141_-3923|20.41|11|17	youxintian_mouse28026	NM_016705	Kif21a	exonic	569
chr15:91497393-91516494-	0	0	4	1	0	1	2	1	0	6.58545	6.58545	11.2859	9.07415	6.58545	8.79054	9.74562	8.88706	6.58545	chr15	91497392	91516494	-	mm9_circ_011334	circBase	NM_001033633	Slc2a13	exonic	369
chr15:92702854-92703093+	0	0	0	0	0	2	0	0	0	6.58545	6.58545	6.58545	6.58545	6.58545	9.62495	6.58545	6.58545	6.58545	chr15	92702853	92703093	+		novel	ENSMUST00000035399	Pdzrn4	intronic	240
chr15:93254301-93261918-	0	0	0	0	0	0	0	0	0	6.58545	6.58545	6.58545	6.58545	6.58545	6.58545	6.58545	6.58545	6.58545	chr15	93254300	93261918	-		novel	NM_001033275	Gxylt1	exonic	550
chr15:93424014-93441712+	0	2	0	0	0	0	0	0	0	6.58545	9.5575	6.58545	6.58545	6.58545	6.58545	6.58545	6.58545	6.58545	chr15	93424013	93441712	+	15_93272143_93254445_-17698|18.53|7|13	youxintian_mouse28026	NM_146062	Pphln1	exonic	274
chr15:95864225-95894541+	0	0	0	0	2	0	0	1	4	6.58545	6.58545	6.58545	6.58545	9.84625	6.58545	6.58545	8.88706	10.7216	chr15	95864224	95894541	+	15_95724972_95694656_-30316|18.90|8|20	youxintian_mouse28026	NM_175344	Ano6	exonic	212
chr15:95948272-95949956+	0	0	0	0	0	0	0	2	0	6.58545	6.58545	6.58545	6.58545	6.58545	6.58545	6.58545	9.73278	6.58545	chr15	95948271	95949956	+	15_95780387_95778703_-1684|13.19|2|2	youxintian_mouse28026	NM_175344	Ano6	exonic	494
chr15:96687958-96690014-	0	0	0	0	0	0	0	0	2	6.58545	6.58545	6.58545	6.58545	6.58545	6.58545	6.58545	6.58545	9.80143	chr15	96687957	96690014	-		novel	NM_175121	Slc38a2	sense overlapping	2057
chr15:97856755-97856944-	0	0	0	0	0	0	0	0	2	6.58545	6.58545	6.58545	6.58545	6.58545	6.58545	6.58545	6.58545	9.80143	chr15	97856754	97856944	-		novel	NM_009504	Vdr	sense overlapping	190
chr15:98084970-98087133-	1	1	0	1	1	1	1	1	0	9.11153	8.73056	6.58545	9.07415	8.98942	8.79054	8.8986	8.88706	6.58545	chr15	98084969	98087133	-	mm9_circ_007788	circBase	NM_144851	Senp1	exonic	179
chr15:98528863-98529453-	1	0	0	1	0	0	3	2	0	9.11153	6.58545	6.58545	9.07415	6.58545	6.58545	10.2758	9.73278	6.58545	chr15	98528862	98529453	-		novel	NM_133714	Kansl2	exonic	331
chr15:98551914-98560325-	0	2	0	1	0	0	0	0	0	6.58545	9.5575	6.58545	9.07415	6.58545	6.58545	6.58545	6.58545	6.58545	chr15	98551913	98560325	-	15_98390756_98382345_-8411|16.79|9|10	youxintian_mouse28026	NM_009833	Ccnt1	exonic	253
chr15:98592673-98604735-	0	0	0	0	0	2	0	0	0	6.58545	6.58545	6.58545	6.58545	6.58545	9.62495	6.58545	6.58545	6.58545	chr15	98592672	98604735	-		novel	NM_007405	Adcy6	sense overlapping	12063
chr15:98740337-98742829-	0	0	0	0	0	0	1	0	0	6.58545	6.58545	6.58545	6.58545	6.58545	6.58545	8.8986	6.58545	6.58545	chr15	98740336	98742829	-	mm9_circ_009996	circBase	NM_007478	Arf3	sense overlapping	2493
chr15:98740991-98742829-	0	0	0	0	0	0	2	0	0	6.58545	6.58545	6.58545	6.58545	6.58545	6.58545	9.74562	6.58545	6.58545	chr15	98740990	98742829	-		novel	NM_007478	Arf3	exonic	473
chr15:98863955-98864110-	0	2	3	0	0	1	0	0	0	6.58545	9.5575	10.8892	6.58545	6.58545	8.79054	6.58545	6.58545	6.58545	chr15	98863954	98864110	-		novel	NM_001033276	Kmt2d	sense overlapping	156
chr15:99401580-99402169+	1	0	0	0	1	0	1	1	0	9.11153	6.58545	6.58545	6.58545	8.98942	6.58545	8.8986	8.88706	6.58545	chr15	99401579	99402169	+	15_99232600_99232011_-589|17.32|22|115	youxintian_mouse28026	NM_026669	Tmbim6	exonic	193
chr15:99406589-99408528+	0	0	0	0	0	0	0	0	0	6.58545	6.58545	6.58545	6.58545	6.58545	6.58545	6.58545	6.58545	6.58545	chr15	99406588	99408528	+		novel	NM_026669	Tmbim6	sense overlapping	1940
chr15:99783520-99796799-	3	1	0	0	0	0	0	0	0	10.519	8.73056	6.58545	6.58545	6.58545	6.58545	6.58545	6.58545	6.58545	chr15	99783519	99796799	-	15_99627230_99613951_-13279|18.80|2|2	youxintian_mouse28026	NM_023063	Lima1	exonic	302
chr15:99819494-99826837-	2	0	0	0	0	2	0	2	0	9.98053	6.58545	6.58545	6.58545	6.58545	9.62495	6.58545	9.73278	6.58545	chr15	99819493	99826837	-	15_99657268_99649925_-7343|20.76|5|9	youxintian_mouse28026	NM_001113545	Lima1	exonic	511
chr15:100115845-100132027+	0	0	0	0	0	0	0	0	0	6.58545	6.58545	6.58545	6.58545	6.58545	6.58545	6.58545	6.58545	6.58545	chr15	100115844	100132027	+		novel	NM_001159361	Dip2b	exonic	198
chr15:100254094-100254513+	0	0	3	0	0	0	0	0	0	6.58545	6.58545	10.8892	6.58545	6.58545	6.58545	6.58545	6.58545	6.58545	chr15	100254093	100254513	+		novel	NM_007497	Atf1	exonic	340
chr15:100469685-100476886+	0	1	0	0	0	0	0	0	1	6.58545	8.73056	6.58545	6.58545	6.58545	6.58545	6.58545	6.58545	8.94889	chr15	100469684	100476886	+	15_100307317_100300116_-7201|20.82|4|6	youxintian_mouse28026	NM_134093	Letmd1	exonic	890
chr15:101174793-101174969+	0	0	0	0	0	0	0	0	0	6.58545	6.58545	6.58545	6.58545	6.58545	6.58545	6.58545	6.58545	6.58545	chr15	101174792	101174969	+		novel	ENSMUST00000000544	Acvr1b	intronic	177
chr15:101193932-101204577+	0	0	0	0	1	1	0	0	2	6.58545	6.58545	6.58545	6.58545	8.98942	8.79054	6.58545	6.58545	9.80143	chr15	101193931	101204577	+	15_101035008_101024363_-10645|18.00|3|3	youxintian_mouse28026	NM_007395	Acvr1b	exonic	1170
chr15:101198784-101204577+	0	0	0	0	0	0	0	1	2	6.58545	6.58545	6.58545	6.58545	6.58545	6.58545	6.58545	8.88706	9.80143	chr15	101198783	101204577	+	15_101035008_101029215_-5793|15.14|9|12	youxintian_mouse28026	NM_007395	Acvr1b	exonic	681
chr15:101414155-101416281+	0	0	0	0	0	2	0	0	0	6.58545	6.58545	6.58545	6.58545	6.58545	9.62495	6.58545	6.58545	6.58545	chr15	101414154	101416281	+		novel	ENSMUST00000183401	Krt7	intronic	2127
chr15:102086003-102086639+	0	1	0	0	0	2	0	0	0	6.58545	8.73056	6.58545	6.58545	6.58545	9.62495	6.58545	6.58545	6.58545	chr15	102086002	102086639	+		novel	NM_145625	Eif4b	exonic	190
chr15:102299803-102304145+	0	2	0	0	0	0	0	0	0	6.58545	9.5575	6.58545	6.58545	6.58545	6.58545	6.58545	6.58545	6.58545	chr15	102299802	102304145	+	mm9_circ_000101	circBase	NM_001014976	Espl1	exonic	443
chr15:102473285-102478747+	0	2	0	0	0	1	0	0	0	6.58545	9.5575	6.58545	6.58545	6.58545	8.79054	6.58545	6.58545	6.58545	chr15	102473284	102478747	+	15_102309178_102303716_-5462|12.45|7|9	youxintian_mouse28026	NM_001174073	Pcbp2	exonic	424
chr15:103519949-103525337+	0	0	0	0	0	0	0	0	0	6.58545	6.58545	6.58545	6.58545	6.58545	6.58545	6.58545	6.58545	6.58545	chr15	103519948	103525337	+		novel	NM_008800	Pde1b	exonic	951
chr16:4137366-4138985-	0	0	0	0	0	0	0	1	0	6.58545	6.58545	6.58545	6.58545	6.58545	6.58545	6.58545	8.88706	6.58545	chr16	4137365	4138985	-	16_4138985_4137366_-1619|17.33|15|44	youxintian_mouse28026	NM_001025432	Crebbp	exonic	355
chr16:4137366-4155033-	0	2	0	0	0	1	0	0	0	6.58545	9.5575	6.58545	6.58545	6.58545	8.79054	6.58545	6.58545	6.58545	chr16	4137365	4155033	-	16_4155033_4137366_-17667|20.33|17|40	youxintian_mouse28026	NM_001025432	Crebbp	exonic	532
chr16:4154857-4180133-	0	2	0	0	0	0	0	1	0	6.58545	9.5575	6.58545	6.58545	6.58545	6.58545	6.58545	8.88706	6.58545	chr16	4154856	4180133	-	16_4180133_4154857_-25276|19.41|12|16	youxintian_mouse28026	NM_001025432	Crebbp	exonic	887
chr16:4179424-4180133-	0	0	0	0	0	0	1	0	2	6.58545	6.58545	6.58545	6.58545	6.58545	6.58545	8.8986	6.58545	9.80143	chr16	4179423	4180133	-	16_4180133_4179424_-709|19.40|10|15	youxintian_mouse28026	NM_001025432	Crebbp	exonic	710
chr16:4918866-4927901+	0	0	0	0	0	0	0	0	0	6.58545	6.58545	6.58545	6.58545	6.58545	6.58545	6.58545	6.58545	6.58545	chr16	4918865	4927901	+		novel	NM_029657	Mgrn1	exonic	614
chr16:4937528-4937826+	0	2	0	0	0	0	0	0	0	6.58545	9.5575	6.58545	6.58545	6.58545	6.58545	6.58545	6.58545	6.58545	chr16	4937527	4937826	+		novel	NM_029657	Mgrn1	sense overlapping	299
chr16:8645369-8646264+	2	0	4	0	1	2	0	4	2	9.98053	6.58545	11.2859	6.58545	8.98942	9.62495	6.58545	10.649	9.80143	chr16	8645368	8646264	+	16_8646357_8645462_-895|16.49|2|2	youxintian_mouse28026	NM_016881	Pmm2	exonic	169
chr16:8707638-8716619-	0	4	0	0	0	0	0	0	0	6.58545	10.4625	6.58545	6.58545	6.58545	6.58545	6.58545	6.58545	6.58545	chr16	8707637	8716619	-	16_8716712_8707731_-8981|18.38|1|2	youxintian_mouse28026	NM_001003918	Usp7	exonic	641
chr16:8842968-8843243+	0	0	0	0	0	0	0	1	2	6.58545	6.58545	6.58545	6.58545	6.58545	6.58545	6.58545	8.88706	9.80143	chr16	8842967	8843243	+		novel	NM_001081400	1810013L24Rik	exonic	276
chr16:11084208-11088569-	0	0	0	0	0	0	0	0	0	6.58545	6.58545	6.58545	6.58545	6.58545	6.58545	6.58545	6.58545	6.58545	chr16	11084207	11088569	-		novel	NM_029582	Txndc11	exonic	1046
chr16:11116795-11128703-	0	2	1	2	6	2	4	1	5	6.58545	9.5575	9.44345	9.93954	11.3272	9.62495	10.6626	8.88706	11.0271	chr16	11116794	11128703	-	mm9_circ_016242	circBase	NM_029582	Txndc11	exonic	445
chr16:11122670-11128703-	0	2	0	0	0	1	0	0	0	6.58545	9.5575	6.58545	6.58545	6.58545	8.79054	6.58545	6.58545	6.58545	chr16	11122669	11128703	-	16_11128796_11122763_-6033|18.17|9|10	youxintian_mouse28026	NM_029582	Txndc11	exonic	315
chr16:11158554-11159124-	0	0	0	0	0	0	0	0	0	6.58545	6.58545	6.58545	6.58545	6.58545	6.58545	6.58545	6.58545	6.58545	chr16	11158553	11159124	-	16_11159217_11158647_-570|18.99|6|9	youxintian_mouse28026	NM_145931	Zc3h7a	exonic	279
chr16:11230510-11239096-	0	3	1	0	0	1	0	0	0	6.58545	10.0798	9.44345	6.58545	6.58545	8.79054	6.58545	6.58545	6.58545	chr16	11230509	11239096	-	16_11239189_11230603_-8586|12.02|11|13	youxintian_mouse28026	NM_001130008	Gspt1	exonic	814
chr16:11230510-11239099-	0	2	0	0	0	0	1	0	0	6.58545	9.5575	6.58545	6.58545	6.58545	6.58545	8.8986	6.58545	6.58545	chr16	11230509	11239099	-	16_11239192_11230603_-8589|11.07|4|5	youxintian_mouse28026	NM_146066	Gspt1	exonic	817
chr16:11445165-11447508+	0	2	1	0	0	0	1	0	2	6.58545	9.5575	9.44345	6.58545	6.58545	6.58545	8.8986	6.58545	9.80143	chr16	11445164	11447508	+	16_11447601_11445258_-2343|20.60|10|25	youxintian_mouse28026	NM_028964	Snx29	exonic	193
chr16:11500529-11571805+	0	0	0	0	2	0	0	0	0	6.58545	6.58545	6.58545	6.58545	9.84625	6.58545	6.58545	6.58545	6.58545	chr16	11500528	11571805	+		novel	NM_028964	Snx29	sense overlapping	71277
chr16:13566570-13647299-	0	0	0	0	0	0	0	0	3	6.58545	6.58545	6.58545	6.58545	6.58545	6.58545	6.58545	6.58545	10.3337	chr16	13566569	13647299	-	16_13647392_13566663_-80729|21.67|9|12	youxintian_mouse28026	NM_028761	Parn	exonic	866
chr16:13603028-13647299-	0	0	0	0	2	1	0	0	1	6.58545	6.58545	6.58545	6.58545	9.84625	8.79054	6.58545	6.58545	8.94889	chr16	13603027	13647299	-	16_13647392_13603121_-44271|16.89|14|25	youxintian_mouse28026	NM_028761	Parn	exonic	697
chr16:13697333-13699075+	1	4	0	2	1	2	5	3	2	9.11153	10.4625	6.58545	9.93954	8.98942	9.62495	10.9673	10.2624	9.80143	chr16	13697332	13699075	+	mm9_circ_009604	circBase	NM_025976	Bfar	exonic	377
chr16:13790621-13800016+	0	1	0	0	0	2	0	0	0	6.58545	8.73056	6.58545	6.58545	6.58545	9.62495	6.58545	6.58545	6.58545	chr16	13790620	13800016	+	16_13800109_13790714_-9395|19.31|2|3	youxintian_mouse28026	NM_001039521	Rrn3	exonic	596
chr16:13854395-13876167-	0	0	0	0	0	0	0	0	0	6.58545	6.58545	6.58545	6.58545	6.58545	6.58545	6.58545	6.58545	6.58545	chr16	13854394	13876167	-		novel	NM_053181	Pdxdc1	exonic	751
chr16:13854395-13884631-	0	0	0	0	0	0	0	0	2	6.58545	6.58545	6.58545	6.58545	6.58545	6.58545	6.58545	6.58545	9.80143	chr16	13854394	13884631	-		novel	NM_053181	Pdxdc1	exonic	1045
chr16:13854395-13887770-	0	0	0	0	2	0	0	0	0	6.58545	6.58545	6.58545	6.58545	9.84625	6.58545	6.58545	6.58545	6.58545	chr16	13854394	13887770	-		novel	NM_053181	Pdxdc1	exonic	1119
chr16:14136938-14149242-	0	2	0	0	0	0	0	0	0	6.58545	9.5575	6.58545	6.58545	6.58545	6.58545	6.58545	6.58545	6.58545	chr16	14136937	14149242	-		novel	NM_001081154	Marf1	exonic	1711
chr16:14138343-14140372-	1	3	1	0	0	0	0	0	0	9.11153	10.0798	9.44345	6.58545	6.58545	6.58545	6.58545	6.58545	6.58545	chr16	14138342	14140372	-	mm9_circ_006366	circBase	NM_001081154	Marf1	exonic	369
chr16:14200847-14201022-	0	0	0	0	0	3	0	0	0	6.58545	6.58545	6.58545	6.58545	6.58545	10.1502	6.58545	6.58545	6.58545	chr16	14200846	14201022	-		novel	AK002785		intronic	176
chr16:14205958-14209705-	0	0	0	0	0	0	0	0	2	6.58545	6.58545	6.58545	6.58545	6.58545	6.58545	6.58545	6.58545	9.80143	chr16	14205957	14209705	-		novel	AK002785		intronic	3748
chr16:14219989-14220241-	0	1	1	1	4	2	1	1	0	6.58545	8.73056	9.44345	9.07415	10.769	9.62495	8.8986	8.88706	6.58545	chr16	14219988	14220241	-		novel	AK002785		intronic	253
chr16:14220269-14221812-	0	0	0	0	0	0	2	0	0	6.58545	6.58545	6.58545	6.58545	6.58545	6.58545	9.74562	6.58545	6.58545	chr16	14220268	14221812	-		novel	AK002785		intronic	1544
chr16:15736753-15740330+	0	0	0	0	0	0	2	0	0	6.58545	6.58545	6.58545	6.58545	6.58545	6.58545	9.74562	6.58545	6.58545	chr16	15736752	15740330	+		novel	NM_011159	Prkdc	exonic	545
chr16:15759485-15816894+	0	0	0	0	0	0	0	0	2	6.58545	6.58545	6.58545	6.58545	6.58545	6.58545	6.58545	6.58545	9.80143	chr16	15759484	15816894	+		novel	NM_011159	Prkdc	exonic	3909
chr16:15912519-15915387-	0	1	0	0	0	0	0	0	0	6.58545	8.73056	6.58545	6.58545	6.58545	6.58545	6.58545	6.58545	6.58545	chr16	15912518	15915387	-	16_15915480_15912612_-2868|19.47|5|5	youxintian_mouse28026	NM_146068	Spidr	exonic	289
chr16:16037490-16037709-	0	0	1	2	0	0	0	0	0	6.58545	6.58545	9.44345	9.93954	6.58545	6.58545	6.58545	6.58545	6.58545	chr16	16037489	16037709	-	16_16037802_16037583_-219|20.82|4|5	youxintian_mouse28026	NM_146068	Spidr	exonic	220
chr16:16037490-16048104-	0	0	0	0	0	0	0	0	0	6.58545	6.58545	6.58545	6.58545	6.58545	6.58545	6.58545	6.58545	6.58545	chr16	16037489	16048104	-	16_16048197_16037583_-10614|15.19|2|2	youxintian_mouse28026	NM_146068	Spidr	exonic	321
chr16:16114827-16140863-	0	2	0	0	0	0	0	0	0	6.58545	9.5575	6.58545	6.58545	6.58545	6.58545	6.58545	6.58545	6.58545	chr16	16114826	16140863	-	16_16140956_16114920_-26036|15.91|15|35	youxintian_mouse28026	NM_146068	Spidr	exonic	555
chr16:16225301-16230776+	3	0	0	1	2	1	0	0	0	10.519	6.58545	6.58545	9.07415	9.84625	8.79054	6.58545	6.58545	6.58545	chr16	16225300	16230776	+	16_16230869_16225394_-5475|17.98|11|30	youxintian_mouse28026	NM_026163	Pkp2	exonic	821
chr16:16230641-16247043+	2	0	0	0	2	1	0	0	0	9.98053	6.58545	6.58545	6.58545	9.84625	8.79054	6.58545	6.58545	6.58545	chr16	16230640	16247043	+	16_16247136_16230734_-16402|16.51|3|3	youxintian_mouse28026	NM_026163	Pkp2	exonic	522
chr16:16453992-16477513-	0	0	0	0	2	0	0	0	1	6.58545	6.58545	6.58545	6.58545	9.84625	6.58545	6.58545	6.58545	8.94889	chr16	16453991	16477513	-	mm9_circ_012606	circBase	NM_139232	Fgd4	exonic	911
chr16:16453992-16504216-	0	1	0	0	0	0	2	0	1	6.58545	8.73056	6.58545	6.58545	6.58545	6.58545	9.74562	6.58545	8.94889	chr16	16453991	16504216	-		novel	NM_139232	Fgd4	exonic	1723
chr16:17013308-17016080+	2	4	1	1	1	5	1	4	5	9.98053	10.4625	9.44345	9.07415	8.98942	10.8376	8.8986	10.649	11.0271	chr16	17013307	17016080	+	mm9_circ_010596	circBase	NM_011949	Mapk1	sense overlapping	2773
chr16:17015898-17018475+	0	1	0	1	1	4	2	2	1	6.58545	8.73056	6.58545	9.07415	8.98942	10.5344	9.74562	9.73278	8.94889	chr16	17015897	17018475	+	16_17018568_17015991_-2577|18.66|20|78	youxintian_mouse28026	NM_011949	Mapk1	exonic	373
chr16:17077775-17095162+	0	0	0	0	0	0	0	0	0	6.58545	6.58545	6.58545	6.58545	6.58545	6.58545	6.58545	6.58545	6.58545	chr16	17077774	17095162	+		novel	NM_023249	Ypel1	sense overlapping	17388
chr16:17092685-17093086-	0	2	0	0	0	0	0	0	0	6.58545	9.5575	6.58545	6.58545	6.58545	6.58545	6.58545	6.58545	6.58545	chr16	17092684	17093086	-		novel	NM_144954	Ppil2	exonic	183
chr16:17348715-17359086-	0	0	0	0	0	2	0	0	0	6.58545	6.58545	6.58545	6.58545	6.58545	9.62495	6.58545	6.58545	6.58545	chr16	17348714	17359086	-		novel	NM_001001983	Pi4ka	exonic	1160
chr16:17373350-17389457-	0	2	0	0	0	0	0	0	0	6.58545	9.5575	6.58545	6.58545	6.58545	6.58545	6.58545	6.58545	6.58545	chr16	17373349	17389457	-	mm9_circ_007694	circBase	NM_001001983	Pi4ka	exonic	700
chr16:17468893-17469358+	2	3	1	1	0	0	1	0	0	9.98053	10.0798	9.44345	9.07415	6.58545	6.58545	8.8986	6.58545	6.58545	chr16	17468892	17469358	+	16_17469451_17468986_-465|17.41|11|21	youxintian_mouse28026	NM_007764	Crkl	exonic	466
chr16:17673069-17697694-	0	0	0	0	0	3	0	0	0	6.58545	6.58545	6.58545	6.58545	6.58545	10.1502	6.58545	6.58545	6.58545	chr16	17673068	17697694	-		novel	NM_033609	Med15	exonic	967
chr16:17683159-17697694-	0	0	0	0	0	0	0	0	0	6.58545	6.58545	6.58545	6.58545	6.58545	6.58545	6.58545	6.58545	6.58545	chr16	17683158	17697694	-	16_17697787_17683252_-14535|20.50|21|74	youxintian_mouse28026	NM_033609	Med15	exonic	170
chr16:18307970-18316734-	0	0	0	2	0	0	0	0	0	6.58545	6.58545	6.58545	9.93954	6.58545	6.58545	6.58545	6.58545	6.58545	chr16	18307969	18316734	-	16_18316827_18308063_-8764|16.73|5|11	youxintian_mouse28026	NM_138583	Tango2	exonic	395
chr16:18811017-18811262-	0	0	0	0	0	0	0	0	0	6.58545	6.58545	6.58545	6.58545	6.58545	6.58545	6.58545	6.58545	6.58545	chr16	18811016	18811262	-		novel	ENSMUST00000000028	Cdc45	intronic	246
chr16:18894774-18899457+	2	0	0	0	0	0	0	0	0	9.98053	6.58545	6.58545	6.58545	6.58545	6.58545	6.58545	6.58545	6.58545	chr16	18894773	18899457	+	mm9_circ_001626	circBase	NM_010435	Hira	exonic	360
chr16:20101992-20123173+	0	0	0	2	0	0	0	0	0	6.58545	6.58545	6.58545	9.93954	6.58545	6.58545	6.58545	6.58545	6.58545	chr16	20101991	20123173	+	16_20123246_20102065_-21181|18.39|3|4	youxintian_mouse28026	NM_029436	Klhl24	sense overlapping	21182
chr16:20150442-20162137+	0	0	0	0	0	0	0	0	5	6.58545	6.58545	6.58545	6.58545	6.58545	6.58545	6.58545	6.58545	11.0271	chr16	20150441	20162137	+	16_20162210_20150515_-11695|15.44|8|8	youxintian_mouse28026	NM_001145930	Yeats2	exonic	834
chr16:20297593-20298326-	0	0	0	0	0	0	0	2	0	6.58545	6.58545	6.58545	6.58545	6.58545	6.58545	6.58545	9.73278	6.58545	chr16	20297592	20298326	-	16_20298399_20297666_-733|17.72|7|7	youxintian_mouse28026	NM_001005767	Parl	exonic	337
chr16:20607764-20609086-	0	0	0	0	0	0	0	3	0	6.58545	6.58545	6.58545	6.58545	6.58545	6.58545	6.58545	10.2624	6.58545	chr16	20607763	20609086	-	16_20609159_20607837_-1322|17.60|6|6	youxintian_mouse28026	NM_145939	Alg3	exonic	530
chr16:21891884-21903937+	0	0	0	0	0	0	0	0	0	6.58545	6.58545	6.58545	6.58545	6.58545	6.58545	6.58545	6.58545	6.58545	chr16	21891883	21903937	+		novel	NM_172821	Map3k13	sense overlapping	12054
chr16:21958781-21968152-	0	0	0	0	0	0	0	0	1	6.58545	6.58545	6.58545	6.58545	6.58545	6.58545	6.58545	6.58545	8.94889	chr16	21958780	21968152	-		novel	NM_153404	Liph	exonic	550
chr16:22011494-22018427+	0	0	0	0	0	0	0	0	0	6.58545	6.58545	6.58545	6.58545	6.58545	6.58545	6.58545	6.58545	6.58545	chr16	22011493	22018427	+	16_22018500_22011567_-6933|21.40|3|3	youxintian_mouse28026	NM_029457	Senp2	exonic	351
chr16:22076017-22083987-	0	0	0	0	0	2	0	0	0	6.58545	6.58545	6.58545	6.58545	6.58545	9.62495	6.58545	6.58545	6.58545	chr16	22076016	22083987	-		novel	NM_183029	Igf2bp2	exonic	839
chr16:24442781-24456942+	0	0	0	1	0	0	0	0	0	6.58545	6.58545	6.58545	9.07415	6.58545	6.58545	6.58545	6.58545	6.58545	chr16	24442780	24456942	+	mm9_circ_006435	circBase	NM_178665	Lpp	exonic	220
chr16:24608116-24661789+	0	2	0	0	0	0	0	0	0	6.58545	9.5575	6.58545	6.58545	6.58545	6.58545	6.58545	6.58545	6.58545	chr16	24608115	24661789	+	16_24661875_24608202_-53673|20.42|1|2	youxintian_mouse28026	NM_178665	Lpp	exonic	315
chr16:24761593-24762276+	1	2	2	0	0	0	1	1	1	9.11153	9.5575	10.3404	6.58545	6.58545	6.58545	8.8986	8.88706	8.94889	chr16	24761592	24762276	+	16_24762362_24761679_-683|23.08|3|3	youxintian_mouse28026	NM_178665	Lpp	exonic	684
chr16:24845091-24889959+	0	2	0	0	1	0	0	0	0	6.58545	9.5575	6.58545	6.58545	8.98942	6.58545	6.58545	6.58545	6.58545	chr16	24845090	24889959	+	16_24890045_24845177_-44868|19.04|7|7	youxintian_mouse28026	NM_178665	Lpp	exonic	297
chr16:24985701-24990610+	0	0	0	0	0	0	0	0	0	6.58545	6.58545	6.58545	6.58545	6.58545	6.58545	6.58545	6.58545	6.58545	chr16	24985700	24990610	+		novel	NM_178665	Lpp	sense overlapping	4910
chr16:28641620-28678093-	0	0	0	0	0	2	0	0	0	6.58545	6.58545	6.58545	6.58545	6.58545	9.62495	6.58545	6.58545	6.58545	chr16	28641619	28678093	-		novel	AK018774		intronic	36474
chr16:29620381-29625604+	0	2	0	0	0	1	0	0	0	6.58545	9.5575	6.58545	6.58545	6.58545	8.79054	6.58545	6.58545	6.58545	chr16	29620380	29625604	+		novel	NM_133752	Opa1	exonic	483
chr16:30359669-30362749-	0	0	0	0	0	0	0	0	2	6.58545	6.58545	6.58545	6.58545	6.58545	6.58545	6.58545	6.58545	9.80143	chr16	30359668	30362749	-		novel	NM_001128094	Atp13a3	exonic	497
chr16:31108027-31141797-	0	0	0	0	2	0	0	0	0	6.58545	6.58545	6.58545	6.58545	9.84625	6.58545	6.58545	6.58545	6.58545	chr16	31108026	31141797	-		novel	NM_030138	Acap2	exonic	1363
chr16:31127321-31141797-	0	2	1	4	1	0	2	0	1	6.58545	9.5575	9.44345	10.8672	8.98942	6.58545	9.74562	6.58545	8.94889	chr16	31127320	31141797	-	mm9_circ_018395	circBase	NM_030138	Acap2	exonic	572
chr16:31805614-31829568+	0	0	0	0	0	0	0	0	0	6.58545	6.58545	6.58545	6.58545	6.58545	6.58545	6.58545	6.58545	6.58545	chr16	31805613	31829568	+		novel	NM_007862	Dlg1	exonic	381
chr16:31829466-31838226+	0	0	0	0	0	0	0	0	0	6.58545	6.58545	6.58545	6.58545	6.58545	6.58545	6.58545	6.58545	6.58545	chr16	31829465	31838226	+		novel	NM_007862	Dlg1	exonic	395
chr16:31977680-31983873-	0	0	0	0	0	0	0	0	0	6.58545	6.58545	6.58545	6.58545	6.58545	6.58545	6.58545	6.58545	6.58545	chr16	31977679	31983873	-	16_31983959_31977766_-6193|12.56|13|14	youxintian_mouse28026	NM_177103	Senp5	exonic	371
chr16:32027712-32037308-	0	0	0	1	0	0	1	0	0	6.58545	6.58545	6.58545	9.07415	6.58545	6.58545	8.8986	6.58545	6.58545	chr16	32027711	32037308	-	16_32037394_32027798_-9596|14.28|2|2	youxintian_mouse28026	NM_177326	Pak2	exonic	444
chr16:32052176-32052383-	0	0	0	0	0	0	0	0	2	6.58545	6.58545	6.58545	6.58545	6.58545	6.58545	6.58545	6.58545	9.80143	chr16	32052175	32052383	-		novel	NM_177326	Pak2	exonic	208
chr16:32084487-32087507-	0	0	2	0	0	0	0	0	0	6.58545	6.58545	10.3404	6.58545	6.58545	6.58545	6.58545	6.58545	6.58545	chr16	32084486	32087507	-	16_32087593_32084573_-3020|20.51|2|2	youxintian_mouse28026	NM_024464	Pigx	sense overlapping	3021
chr16:32084487-32092485-	0	0	0	0	0	0	0	0	0	6.58545	6.58545	6.58545	6.58545	6.58545	6.58545	6.58545	6.58545	6.58545	chr16	32084486	32092485	-	16_32092571_32084573_-7998|15.99|4|4	youxintian_mouse28026	NM_024464	Pigx	sense overlapping	7999
chr16:32367344-32376024+	0	0	0	0	0	0	0	0	3	6.58545	6.58545	6.58545	6.58545	6.58545	6.58545	6.58545	6.58545	10.3337	chr16	32367343	32376024	+	16_32376110_32367430_-8680|20.43|10|13	youxintian_mouse28026	NM_177633	Ubxn7	exonic	545
chr16:32618218-32619176+	0	0	0	0	0	1	0	2	0	6.58545	6.58545	6.58545	6.58545	6.58545	8.79054	6.58545	9.73278	6.58545	chr16	32618217	32619176	+	16_32619262_32618304_-958|19.38|12|32	youxintian_mouse28026	NM_011638	Tfrc	exonic	353
chr16:32752132-32754301+	0	2	0	0	0	0	0	0	0	6.58545	9.5575	6.58545	6.58545	6.58545	6.58545	6.58545	6.58545	6.58545	chr16	32752131	32754301	+		novel	NM_080457	Muc4	sense overlapping	2170
chr16:32754644-32755387+	0	1	1	0	1	0	0	2	0	6.58545	8.73056	9.44345	6.58545	8.98942	6.58545	6.58545	9.73278	6.58545	chr16	32754643	32755387	+		novel	NM_080457	Muc4	sense overlapping	744
chr16:32754644-32756143+	0	1	1	1	0	1	1	2	0	6.58545	8.73056	9.44345	9.07415	6.58545	8.79054	8.8986	9.73278	6.58545	chr16	32754643	32756143	+		novel	NM_080457	Muc4	sense overlapping	1500
chr16:32754975-32756102+	0	3	1	0	0	1	0	2	0	6.58545	10.0798	9.44345	6.58545	6.58545	8.79054	6.58545	9.73278	6.58545	chr16	32754974	32756102	+		novel	NM_080457	Muc4	sense overlapping	1128
chr16:32755016-32756143+	0	3	1	0	0	1	0	2	0	6.58545	10.0798	9.44345	6.58545	6.58545	8.79054	6.58545	9.73278	6.58545	chr16	32755015	32756143	+		novel	NM_080457	Muc4	sense overlapping	1128
chr16:32950292-32961744+	1	3	3	6	5	5	5	1	4	9.11153	10.0798	10.8892	11.4272	11.0749	10.8376	10.9673	8.88706	10.7216	chr16	32950291	32961744	+	mm9_circ_007087	circBase	NM_001081255	Lrch3	exonic	625
chr16:32981828-32988481+	0	0	0	0	1	1	0	1	4	6.58545	6.58545	6.58545	6.58545	8.98942	8.79054	6.58545	8.88706	10.7216	chr16	32981827	32988481	+	mm9_circ_017669	circBase	NM_001081255	Lrch3	exonic	330
chr16:33204672-33206002+	0	0	0	0	0	0	3	0	0	6.58545	6.58545	6.58545	6.58545	6.58545	6.58545	10.2758	6.58545	6.58545	chr16	33204671	33206002	+	16_33206088_33204758_-1330|18.45|14|27	youxintian_mouse28026	NM_176840	Osbpl11	exonic	256
chr16:33421321-33434974+	0	3	0	6	2	2	2	7	4	6.58545	10.0798	6.58545	11.4272	9.84625	9.62495	9.74562	11.4189	10.7216	chr16	33421320	33434974	+	mm9_circ_000155	circBase	NM_011749	Zfp148	exonic	567
chr16:33421321-33457001+	0	0	0	0	0	0	0	0	3	6.58545	6.58545	6.58545	6.58545	6.58545	6.58545	6.58545	6.58545	10.3337	chr16	33421320	33457001	+	16_33457087_33421407_-35680|16.87|17|90	youxintian_mouse28026	NM_011749	Zfp148	exonic	693
chr16:33456876-33468183+	0	1	0	1	0	0	0	3	2	6.58545	8.73056	6.58545	9.07415	6.58545	6.58545	6.58545	10.2624	9.80143	chr16	33456875	33468183	+	16_33468269_33456962_-11307|20.32|20|84	youxintian_mouse28026	NM_011749	Zfp148	exonic	334
chr16:33706916-33710699+	0	0	0	0	0	0	2	0	0	6.58545	6.58545	6.58545	6.58545	6.58545	6.58545	9.74562	6.58545	6.58545	chr16	33706915	33710699	+	16_33710785_33707002_-3783|13.94|2|2	youxintian_mouse28026	ENSMUST00000126532	Heg1	exonic	591
chr16:33719507-33742496+	0	0	0	0	0	0	2	0	0	6.58545	6.58545	6.58545	6.58545	6.58545	6.58545	9.74562	6.58545	6.58545	chr16	33719506	33742496	+		novel	ENSMUST00000126532	Heg1	exonic	2685
chr16:33798933-33799094+	1	10	4	1	3	6	6	9	6	9.11153	11.7243	11.2859	9.07415	10.3801	11.0879	11.2188	11.7702	11.279	chr16	33798932	33799094	+		novel	NM_010739	Muc13	sense overlapping	162
chr16:33798933-33799175+	2	2	1	0	0	1	0	0	0	9.98053	9.5575	9.44345	6.58545	6.58545	8.79054	6.58545	6.58545	6.58545	chr16	33798932	33799175	+		novel	NM_010739	Muc13	sense overlapping	243
chr16:33798933-33799418+	0	2	1	0	0	0	0	0	1	6.58545	9.5575	9.44345	6.58545	6.58545	6.58545	6.58545	6.58545	8.94889	chr16	33798932	33799418	+		novel	NM_010739	Muc13	sense overlapping	486
chr16:33798933-33799499+	0	0	1	0	0	0	0	1	1	6.58545	6.58545	9.44345	6.58545	6.58545	6.58545	6.58545	8.88706	8.94889	chr16	33798932	33799499	+		novel	NM_010739	Muc13	sense overlapping	567
chr16:33799014-33799499+	0	2	0	0	0	0	1	0	0	6.58545	9.5575	6.58545	6.58545	6.58545	6.58545	8.8986	6.58545	6.58545	chr16	33799013	33799499	+		novel	NM_010739	Muc13	sense overlapping	486
chr16:33804580-33808034+	0	2	0	0	0	0	0	0	0	6.58545	9.5575	6.58545	6.58545	6.58545	6.58545	6.58545	6.58545	6.58545	chr16	33804579	33808034	+		novel	NM_010739	Muc13	exonic	330
chr16:33811766-33815869+	2	0	0	0	0	0	0	0	0	9.98053	6.58545	6.58545	6.58545	6.58545	6.58545	6.58545	6.58545	6.58545	chr16	33811765	33815869	+		novel	NM_010739	Muc13	exonic	446
chr16:35438113-35466657-	0	0	0	0	0	0	0	0	0	6.58545	6.58545	6.58545	6.58545	6.58545	6.58545	6.58545	6.58545	6.58545	chr16	35438112	35466657	-	16_35466743_35438199_-28544|17.98|1|2	youxintian_mouse28026	NM_028295	Pdia5	exonic	567
chr16:35929303-35931590-	0	0	2	0	1	0	0	0	0	6.58545	6.58545	10.3404	6.58545	8.98942	6.58545	6.58545	6.58545	6.58545	chr16	35929302	35931590	-	mm9_circ_018087	circBase	NM_001013371	Dtx3l	sense overlapping	2288
chr16:36904553-36919796+	0	0	0	0	0	0	0	3	0	6.58545	6.58545	6.58545	6.58545	6.58545	6.58545	6.58545	10.2624	6.58545	chr16	36904552	36919796	+	16_36919882_36904639_-15243|16.39|5|6	youxintian_mouse28026	NM_030035	Golgb1	exonic	7206
chr16:37877049-37878564+	1	2	0	0	1	0	2	0	4	9.11153	9.5575	6.58545	6.58545	8.98942	6.58545	9.74562	6.58545	10.7216	chr16	37877048	37878564	+	16_37878650_37877135_-1515|19.14|17|47	youxintian_mouse28026	NM_177093	Lrrc58	exonic	407
chr16:43072424-43146943+	0	0	0	0	3	0	0	0	0	6.58545	6.58545	6.58545	6.58545	10.3801	6.58545	6.58545	6.58545	6.58545	chr16	43072423	43146943	+		novel	ENSMUST00000114694	Zbtb20	exonic	93
chr16:43230353-43302615+	0	0	0	0	2	0	0	0	0	6.58545	6.58545	6.58545	6.58545	9.84625	6.58545	6.58545	6.58545	6.58545	chr16	43230352	43302615	+		novel	AK078664		intronic	72263
chr16:43302569-43363176+	0	0	0	0	2	0	0	0	0	6.58545	6.58545	6.58545	6.58545	9.84625	6.58545	6.58545	6.58545	6.58545	chr16	43302568	43363176	+		novel	AK078664		intronic	60608
chr16:43569681-43577748+	0	2	0	1	1	0	0	0	0	6.58545	9.5575	6.58545	9.07415	8.98942	6.58545	6.58545	6.58545	6.58545	chr16	43569680	43577748	+	mm9_circ_017140	circBase	NM_019778	Zbtb20	exonic	511
chr16:43635420-43635674+	0	0	0	0	0	0	0	0	0	6.58545	6.58545	6.58545	6.58545	6.58545	6.58545	6.58545	6.58545	6.58545	chr16	43635419	43635674	+		novel	AK078664		intronic	255
chr16:44200614-44205080+	5	3	0	2	2	1	1	4	4	11.2177	10.0798	6.58545	9.93954	9.84625	8.79054	8.8986	10.649	10.7216	chr16	44200613	44205080	+	16_44205193_44200727_-4466|20.28|15|41	youxintian_mouse28026	NM_001029889	Gm608	exonic	177
chr16:44520225-44521335-	0	0	0	0	0	0	1	0	0	6.58545	6.58545	6.58545	6.58545	6.58545	6.58545	8.8986	6.58545	6.58545	chr16	44520224	44521335	-	16_44521448_44520338_-1110|16.39|13|94	youxintian_mouse28026	NM_172506	Boc	exonic	456
chr16:45442447-45444165-	0	2	0	2	6	2	2	1	0	6.58545	9.5575	6.58545	9.93954	11.3272	9.62495	9.74562	8.88706	6.58545	chr16	45442446	45444165	-		novel	NM_001005854	Gm609	exonic	639
chr16:45632981-45640432-	0	0	0	0	0	2	0	0	0	6.58545	6.58545	6.58545	6.58545	6.58545	9.62495	6.58545	6.58545	6.58545	chr16	45632980	45640432	-		novel	NM_145389	BC016579	exonic	199
chr16:45777713-45789117-	1	0	0	0	0	0	0	0	0	9.11153	6.58545	6.58545	6.58545	6.58545	6.58545	6.58545	6.58545	6.58545	chr16	45777712	45789117	-	16_45789230_45777826_-11404|15.72|6|9	youxintian_mouse28026	NM_153412	Phldb2	exonic	486
chr16:46436354-46438068-	0	0	0	0	0	1	0	0	0	6.58545	6.58545	6.58545	6.58545	6.58545	8.79054	6.58545	6.58545	6.58545	chr16	46436353	46438068	-	mm9_circ_018772	circBase	NM_021496	Pvrl3	exonic	224
chr16:48942076-48953803-	0	0	0	0	0	0	0	0	0	6.58545	6.58545	6.58545	6.58545	6.58545	6.58545	6.58545	6.58545	6.58545	chr16	48942075	48953803	-		novel	NM_027341	Dzip3	exonic	744
chr16:49894177-49898132+	0	2	0	0	0	0	0	0	0	6.58545	9.5575	6.58545	6.58545	6.58545	6.58545	6.58545	6.58545	6.58545	chr16	49894176	49898132	+		novel	NM_010581	Cd47	exonic	387
chr16:50224383-50224548-	0	0	0	0	0	0	0	2	0	6.58545	6.58545	6.58545	6.58545	6.58545	6.58545	6.58545	9.73278	6.58545	chr16	50224382	50224548	-		novel	NM_027444	Bbx	sense overlapping	166
chr16:52164296-52174448+	0	0	1	0	2	0	0	0	0	6.58545	6.58545	9.44345	6.58545	9.84625	6.58545	6.58545	6.58545	6.58545	chr16	52164295	52174448	+		novel	NM_001033238	Cblb	exonic	644
chr16:55998006-56002826+	0	0	0	0	0	0	0	2	0	6.58545	6.58545	6.58545	6.58545	6.58545	6.58545	6.58545	9.73278	6.58545	chr16	55998005	56002826	+	16_56002939_55998119_-4820|19.97|2|2	youxintian_mouse28026	NM_173026	Zbtb11	exonic	509
chr16:56613167-56647099+	0	0	0	0	0	0	0	0	2	6.58545	6.58545	6.58545	6.58545	6.58545	6.58545	6.58545	6.58545	9.80143	chr16	56613166	56647099	+		novel	NM_001014423	Abi3bp	exonic	345
chr16:56767818-56795676-	0	0	0	0	0	0	0	0	2	6.58545	6.58545	6.58545	6.58545	6.58545	6.58545	6.58545	6.58545	9.80143	chr16	56767817	56795676	-		novel	NM_172825	Adgrg7	sense overlapping	27859
chr16:57569650-57572425+	1	2	1	2	0	3	1	2	0	9.11153	9.5575	9.44345	9.93954	6.58545	10.1502	8.8986	9.73278	6.58545	chr16	57569649	57572425	+	16_57572538_57569763_-2775|20.81|10|29	youxintian_mouse28026	NM_001040397	Filip1l	sense overlapping	2776
chr16:58424561-58433463+	0	0	2	0	2	2	1	4	1	6.58545	6.58545	10.3404	6.58545	9.84625	9.62495	8.8986	10.649	8.94889	chr16	58424560	58433463	+	mm9_circ_015268	circBase	NM_028523	Dcbld2	exonic	366
chr16:58484763-58507614-	4	11	7	8	24	2	11	15	9	10.9103	11.8581	12.0693	11.8296	13.2862	9.62495	12.0666	12.4912	11.8452	chr16	58484762	58507614	-	16_58507727_58484876_-22851|20.24|14|24	youxintian_mouse28026	NM_018784	St3gal6	exonic	595
chr16:58507448-58507614-	0	0	0	0	0	0	0	2	0	6.58545	6.58545	6.58545	6.58545	6.58545	6.58545	6.58545	9.73278	6.58545	chr16	58507447	58507614	-		novel	NM_018784	St3gal6	exonic	167
chr16:60414391-60414643-	0	0	0	0	0	2	0	0	0	6.58545	6.58545	6.58545	6.58545	6.58545	9.62495	6.58545	6.58545	6.58545	chr16	60414390	60414643	-		novel	ENSMUST00000068860	Epha6	intronic	253
chr16:62827164-62830813-	0	2	1	0	0	0	0	1	0	6.58545	9.5575	9.44345	6.58545	6.58545	6.58545	6.58545	8.88706	6.58545	chr16	62827163	62830813	-	16_62830639_62826990_-3649|12.51|19|70	youxintian_mouse28026	NM_026577	Arl13b	exonic	321
chr16:70433545-70441319+	0	3	0	0	1	1	0	0	2	6.58545	10.0798	6.58545	6.58545	8.98942	8.79054	6.58545	6.58545	9.80143	chr16	70433544	70441319	+	16_70441564_70433790_-7774|24.00|25|113	youxintian_mouse28026	NM_028803	Gbe1	exonic	563
chr16:76330746-76352546-	0	0	0	0	1	0	1	1	2	6.58545	6.58545	6.58545	6.58545	8.98942	6.58545	8.8986	8.88706	9.80143	chr16	76330745	76352546	-	mm9_circ_000542	circBase	uc007zry.1	Nrip1	exonic	194
chr16:76330746-76352549-	1	1	0	0	0	1	4	0	1	9.11153	8.73056	6.58545	6.58545	6.58545	8.79054	10.6626	6.58545	8.94889	chr16	76330745	76352549	-	mm9_circ_016045	circBase	NM_173440	Nrip1	exonic	197
chr16:76367648-76368101-	0	0	0	0	0	0	0	0	0	6.58545	6.58545	6.58545	6.58545	6.58545	6.58545	6.58545	6.58545	6.58545	chr16	76367647	76368101	-		novel	ENSMUST00000121927	Nrip1	intronic	454
chr16:81423276-81443271+	0	2	0	0	0	0	0	0	0	6.58545	9.5575	6.58545	6.58545	6.58545	6.58545	6.58545	6.58545	6.58545	chr16	81423275	81443271	+		novel	NM_010954	Ncam2	sense overlapping	19996
chr16:85013627-85030365-	0	0	0	0	0	6	0	1	0	6.58545	6.58545	6.58545	6.58545	6.58545	11.0879	6.58545	8.88706	6.58545	chr16	85013626	85030365	-	mm9_circ_016270	circBase	NM_007471	App	exonic	597
chr16:85013627-85043743-	1	1	0	1	1	0	0	2	0	9.11153	8.73056	6.58545	9.07415	8.98942	6.58545	6.58545	9.73278	6.58545	chr16	85013626	85043743	-	16_85043988_85013872_-30116|17.40|10|10	youxintian_mouse28026	NM_001198823	App	exonic	822
chr16:85101592-85103335-	1	0	0	0	2	0	0	0	0	9.11153	6.58545	6.58545	6.58545	9.84625	6.58545	6.58545	6.58545	6.58545	chr16	85101591	85103335	-		novel	NM_007471	App	sense overlapping	1744
chr16:87464735-87473185+	0	0	0	0	0	0	0	0	0	6.58545	6.58545	6.58545	6.58545	6.58545	6.58545	6.58545	6.58545	6.58545	chr16	87464734	87473185	+		novel	NM_024258	Usp16	exonic	790
chr16:87486236-87486520-	0	2	0	0	0	0	0	0	0	6.58545	9.5575	6.58545	6.58545	6.58545	6.58545	6.58545	6.58545	6.58545	chr16	87486235	87486520	-		novel	NM_009840	Cct8	exonic	204
chr16:89855845-89867734-	0	0	0	0	0	0	0	0	0	6.58545	6.58545	6.58545	6.58545	6.58545	6.58545	6.58545	6.58545	6.58545	chr16	89855844	89867734	-		novel	NM_009384	Tiam1	exonic	804
chr16:90247170-90257402-	0	0	0	0	0	0	0	0	0	6.58545	6.58545	6.58545	6.58545	6.58545	6.58545	6.58545	6.58545	6.58545	chr16	90247169	90257402	-		novel	NM_178923	Scaf4	exonic	1326
chr16:91812090-91828333+	0	0	0	0	0	0	0	0	2	6.58545	6.58545	6.58545	6.58545	6.58545	6.58545	6.58545	6.58545	9.80143	chr16	91812089	91828333	+	16_91828578_91812335_-16243|15.39|4|5	youxintian_mouse28026	NM_010587	Itsn1	exonic	1097
chr16:91858209-91861239+	0	0	0	0	0	0	0	2	0	6.58545	6.58545	6.58545	6.58545	6.58545	6.58545	6.58545	9.73278	6.58545	chr16	91858208	91861239	+		novel	NM_010587	Itsn1	exonic	213
chr16:91926459-91926982-	1	0	0	0	0	0	0	0	2	9.11153	6.58545	6.58545	6.58545	6.58545	6.58545	6.58545	6.58545	9.80143	chr16	91926458	91926982	-	16_91927227_91926704_-523|15.67|8|11	youxintian_mouse28026	NM_138597	Atp5o	exonic	243
chr16:92644154-92668812-	0	0	0	0	0	0	0	0	0	6.58545	6.58545	6.58545	6.58545	6.58545	6.58545	6.58545	6.58545	6.58545	chr16	92644153	92668812	-	16_92669057_92644399_-24658|23.13|2|2	youxintian_mouse28026	NM_001111021	Runx1	exonic	297
chr16:93799907-93806471+	0	0	0	0	0	0	0	0	1	6.58545	6.58545	6.58545	6.58545	6.58545	6.58545	6.58545	6.58545	8.94889	chr16	93799906	93806471	+	16_93806716_93800152_-6564|20.53|2|2	youxintian_mouse28026	NM_027293	Dopey2	exonic	585
chr16:93807213-93809421+	1	2	0	1	0	0	2	0	0	9.11153	9.5575	6.58545	9.07415	6.58545	6.58545	9.74562	6.58545	6.58545	chr16	93807212	93809421	+	16_93809666_93807458_-2208|15.75|3|3	youxintian_mouse28026	NM_027293	Dopey2	exonic	345
chr16:93847288-93853217+	3	0	3	0	0	0	3	2	1	10.519	6.58545	10.8892	6.58545	6.58545	6.58545	10.2758	9.73278	8.94889	chr16	93847287	93853217	+		novel	NM_001045529	Morc3	sense overlapping	5930
chr16:93849130-93853898+	0	8	1	2	3	3	5	1	4	6.58545	11.4126	9.44345	9.93954	10.3801	10.1502	10.9673	8.88706	10.7216	chr16	93849129	93853898	+	mm9_circ_017370	circBase	NM_001045529	Morc3	exonic	397
chr16:94262592-94268698-	3	1	0	2	1	2	1	2	0	10.519	8.73056	6.58545	9.93954	8.98942	9.62495	8.8986	9.73278	6.58545	chr16	94262591	94268698	-	mm9_circ_008970	circBase	NM_139145	Hlcs	exonic	1278
chr16:94383912-94385423+	0	1	0	0	0	0	0	0	0	6.58545	8.73056	6.58545	6.58545	6.58545	6.58545	6.58545	6.58545	6.58545	chr16	94383911	94385423	+	16_94607030_94605519_-1511|17.22|12|31	youxintian_mouse28026	NM_009441	Ttc3	exonic	437
chr16:94383912-94393174+	1	7	0	3	2	1	1	1	3	9.11153	11.2272	6.58545	10.4767	9.84625	8.79054	8.8986	8.88706	10.3337	chr16	94383911	94393174	+	mm9_circ_015661	circBase	NM_009441	Ttc3	exonic	856
chr16:94383912-94403368+	3	3	1	4	2	10	5	6	0	10.519	10.0798	9.44345	10.8672	9.84625	11.7992	10.9673	11.2049	6.58545	chr16	94383911	94403368	+	mm9_circ_010404	circBase	NM_009441	Ttc3	exonic	911
chr16:94383912-94412123+	1	0	0	0	0	0	0	1	0	9.11153	6.58545	6.58545	6.58545	6.58545	6.58545	6.58545	8.88706	6.58545	chr16	94383911	94412123	+	16_94633730_94605519_-28211|17.25|14|57	youxintian_mouse28026	NM_009441	Ttc3	exonic	1308
chr16:94403314-94412123+	0	1	1	0	2	1	1	0	1	6.58545	8.73056	9.44345	6.58545	9.84625	8.79054	8.8986	6.58545	8.94889	chr16	94403313	94412123	+	mm9_circ_015934	circBase	NM_009441	Ttc3	exonic	452
chr16:94611419-94631202+	0	0	0	2	0	0	0	0	0	6.58545	6.58545	6.58545	9.93954	6.58545	6.58545	6.58545	6.58545	6.58545	chr16	94611418	94631202	+		novel	AK139493		intronic	19784
chr16:94611419-94659693+	0	0	0	0	0	0	0	0	2	6.58545	6.58545	6.58545	6.58545	6.58545	6.58545	6.58545	6.58545	9.80143	chr16	94611418	94659693	+	16_94881300_94833026_-48274|16.37|7|8	youxintian_mouse28026	NM_007890	Dyrk1a	exonic	283
chr16:94611419-94677592+	1	0	2	0	0	0	1	0	0	9.11153	6.58545	10.3404	6.58545	6.58545	6.58545	8.8986	6.58545	6.58545	chr16	94611418	94677592	+	16_94899199_94833026_-66173|12.98|18|45	youxintian_mouse28026	NM_007890	Dyrk1a	exonic	1315
chr16:94659497-94677592+	0	0	0	1	2	2	0	0	0	6.58545	6.58545	6.58545	9.07415	9.84625	9.62495	6.58545	6.58545	6.58545	chr16	94659496	94677592	+	16_94899199_94881104_-18095|13.09|13|22	youxintian_mouse28026	NM_007890	Dyrk1a	exonic	1229
chr16:95524527-95530365-	0	0	0	0	0	0	0	0	0	6.58545	6.58545	6.58545	6.58545	6.58545	6.58545	6.58545	6.58545	6.58545	chr16	95524526	95530365	-		novel	NM_133659	Erg	exonic	190
chr16:96064750-96068627-	1	0	0	0	0	2	0	1	0	9.11153	6.58545	6.58545	6.58545	6.58545	9.62495	6.58545	8.88706	6.58545	chr16	96064749	96068627	-	16_96290234_96286357_-3877|16.92|8|8	youxintian_mouse28026	NM_145125	Brwd1	exonic	633
chr16:96396369-96422534+	3	4	2	3	0	5	1	0	8	10.519	10.4625	10.3404	10.4767	6.58545	10.8376	8.8986	6.58545	11.68	chr16	96396368	96422534	+	16_96644141_96617976_-26165|12.57|4|5	youxintian_mouse28026	NM_028078	Igsf5	sense overlapping	26166
chr16:96396369-96422540+	0	1	0	1	0	2	0	0	0	6.58545	8.73056	6.58545	9.07415	6.58545	9.62495	6.58545	6.58545	6.58545	chr16	96396368	96422540	+		novel	NM_028078	Igsf5	sense overlapping	26172
chr16:96426463-96426645+	3	0	0	0	0	0	0	0	0	10.519	6.58545	6.58545	6.58545	6.58545	6.58545	6.58545	6.58545	6.58545	chr16	96426462	96426645	+		novel	AK164699		intronic	183
chr16:97590820-97599322-	0	0	0	1	0	0	0	2	1	6.58545	6.58545	6.58545	9.07415	6.58545	6.58545	6.58545	9.73278	8.94889	chr16	97590819	97599322	-		novel	NM_015775	Tmprss2	exonic	495
chr17:3145075-3164277+	0	0	0	0	0	0	1	0	0	6.58545	6.58545	6.58545	6.58545	6.58545	6.58545	8.8986	6.58545	6.58545	chr17	3145074	3164277	+		novel	NM_134123	Scaf8	exonic	576
chr17:3162959-3178348+	0	0	0	0	0	0	0	2	0	6.58545	6.58545	6.58545	6.58545	6.58545	6.58545	6.58545	9.73278	6.58545	chr17	3162958	3178348	+		novel	NM_134123	Scaf8	exonic	1099
chr17:5040580-5127024+	1	0	0	1	0	3	1	0	0	9.11153	6.58545	6.58545	9.07415	6.58545	10.1502	8.8986	6.58545	6.58545	chr17	5040579	5127024	+	17_5127024_5040580_-86444|16.20|18|46	youxintian_mouse28026	NM_001085355	Arid1b	exonic	465
chr17:5097574-5127024+	0	0	0	1	0	1	0	2	0	6.58545	6.58545	6.58545	9.07415	6.58545	8.79054	6.58545	9.73278	6.58545	chr17	5097573	5127024	+	17_5127024_5097574_-29450|13.85|4|7	youxintian_mouse28026	NM_001085355	Arid1b	exonic	270
chr17:5264032-5279382+	0	0	0	0	0	0	0	0	1	6.58545	6.58545	6.58545	6.58545	6.58545	6.58545	6.58545	6.58545	8.94889	chr17	5264031	5279382	+	17_5279382_5264032_-15350|20.58|10|23	youxintian_mouse28026	NM_001085355	Arid1b	exonic	270
chr17:5279203-5291283+	0	0	0	0	0	0	0	0	0	6.58545	6.58545	6.58545	6.58545	6.58545	6.58545	6.58545	6.58545	6.58545	chr17	5279202	5291283	+	17_5291283_5279203_-12080|20.99|5|6	youxintian_mouse28026	NM_001085355	Arid1b	exonic	508
chr17:5886997-5891899+	0	1	0	1	0	0	0	1	1	6.58545	8.73056	6.58545	9.07415	6.58545	6.58545	6.58545	8.88706	8.94889	chr17	5886996	5891899	+	17_5891899_5886997_-4902|19.53|11|18	youxintian_mouse28026	NM_025664	Snx9	exonic	288
chr17:6121828-6139156+	0	0	0	0	0	1	0	0	0	6.58545	6.58545	6.58545	6.58545	6.58545	8.79054	6.58545	6.58545	6.58545	chr17	6121827	6139156	+	17_6139156_6121828_-17328|19.17|5|5	youxintian_mouse28026	ENSMUST00000142030	Tulp4	intronic	17329
chr17:6137211-6139156+	34	47	15	31	36	39	34	37	49	13.9328	13.9243	13.1515	13.7553	13.8665	13.7335	13.6726	13.7794	14.259	chr17	6137210	6139156	+	mm9_circ_008009	circBase	ENSMUST00000142030	Tulp4	intronic	1946
chr17:6137211-6143082+	0	0	0	0	0	0	0	0	0	6.58545	6.58545	6.58545	6.58545	6.58545	6.58545	6.58545	6.58545	6.58545	chr17	6137210	6143082	+		novel	ENSMUST00000142030	Tulp4	intronic	5872
chr17:6137211-6176957+	0	0	0	0	2	0	0	0	2	6.58545	6.58545	6.58545	6.58545	9.84625	6.58545	6.58545	6.58545	9.80143	chr17	6137210	6176957	+	17_6176957_6137211_-39746|20.12|17|47	youxintian_mouse28026	NM_054040	Tulp4	sense overlapping	39747
chr17:6137211-6185298+	0	0	2	0	0	1	0	1	0	6.58545	6.58545	10.3404	6.58545	6.58545	8.79054	6.58545	8.88706	6.58545	chr17	6137210	6185298	+	17_6185298_6137211_-48087|18.69|23|202	youxintian_mouse28026	NM_054040	Tulp4	sense overlapping	48088
chr17:6137211-6207057+	0	0	0	0	2	1	1	0	0	6.58545	6.58545	6.58545	6.58545	9.84625	8.79054	8.8986	6.58545	6.58545	chr17	6137210	6207057	+	17_6207057_6137211_-69846|20.03|15|35	youxintian_mouse28026	NM_054040	Tulp4	sense overlapping	69847
chr17:6744845-6745054-	0	0	0	0	2	0	0	0	0	6.58545	6.58545	6.58545	6.58545	9.84625	6.58545	6.58545	6.58545	6.58545	chr17	6744844	6745054	-		novel	ENSMUST00000064234	Ezr	intronic	210
chr17:8596282-8596594+	0	0	0	0	0	0	0	0	0	6.58545	6.58545	6.58545	6.58545	6.58545	6.58545	6.58545	6.58545	6.58545	chr17	8596281	8596594	+		novel	NM_001290707	Pde10a	intronic	313
chr17:12270863-12272220-	0	2	0	0	0	0	0	1	0	6.58545	9.5575	6.58545	6.58545	6.58545	6.58545	6.58545	8.88706	6.58545	chr17	12270862	12272220	-		novel	NM_011948	Map3k4	exonic	1358
chr17:12919351-12920866+	2	0	0	0	0	0	0	0	1	9.98053	6.58545	6.58545	6.58545	6.58545	6.58545	6.58545	6.58545	8.94889	chr17	12919350	12920866	+	17_13113732_13112217_-1515|14.88|2|2	youxintian_mouse28026	NM_013686	Tcp1	exonic	518
chr17:13590773-13655082-	0	2	0	0	0	0	0	0	0	6.58545	9.5575	6.58545	6.58545	6.58545	6.58545	6.58545	6.58545	6.58545	chr17	13590772	13655082	-		novel	ENSMUST00000135850	Tcte2	intronic	64310
chr17:13777338-13777600+	0	2	0	0	1	0	0	0	0	6.58545	9.5575	6.58545	6.58545	8.98942	6.58545	6.58545	6.58545	6.58545	chr17	13777337	13777600	+		novel	ENSMUST00000137495	Mllt4	intronic	263
chr17:21747224-21748401+	0	0	0	0	3	0	0	0	0	6.58545	6.58545	6.58545	6.58545	10.3801	6.58545	6.58545	6.58545	6.58545	chr17	21747223	21748401	+		novel	AK147958		intronic	1178
chr17:23807027-23812585+	0	0	0	0	0	0	0	0	0	6.58545	6.58545	6.58545	6.58545	6.58545	6.58545	6.58545	6.58545	6.58545	chr17	23807026	23812585	+		novel	NM_175229	Srrm2	sense overlapping	5559
chr17:23819013-23819877+	0	0	0	0	0	0	0	0	0	6.58545	6.58545	6.58545	6.58545	6.58545	6.58545	6.58545	6.58545	6.58545	chr17	23819012	23819877	+		novel	NM_175229	Srrm2	sense overlapping	865
chr17:24088004-24111117-	0	0	0	3	0	0	1	0	1	6.58545	6.58545	6.58545	10.4767	6.58545	6.58545	8.8986	6.58545	8.94889	chr17	24088003	24111117	-	17_24248084_24224971_-23113|17.87|9|21	youxintian_mouse28026	NM_011062	Pdpk1	exonic	1328
chr17:24100811-24111117-	1	0	0	0	0	2	1	0	0	9.11153	6.58545	6.58545	6.58545	6.58545	9.62495	8.8986	6.58545	6.58545	chr17	24100810	24111117	-	17_24248084_24237778_-10306|18.81|8|9	youxintian_mouse28026	NM_011062	Pdpk1	exonic	694
chr17:24185204-24190053-	0	1	0	0	0	0	0	0	0	6.58545	8.73056	6.58545	6.58545	6.58545	6.58545	6.58545	6.58545	6.58545	chr17	24185203	24190053	-	17_24326998_24322149_-4849|19.59|8|12	youxintian_mouse28026	NM_173186	Tbc1d24	exonic	1194
chr17:24433133-24434155+	0	0	0	0	0	2	3	1	0	6.58545	6.58545	6.58545	6.58545	6.58545	9.62495	10.2758	8.88706	6.58545	chr17	24433132	24434155	+	17_24571100_24570078_-1022|17.36|9|10	youxintian_mouse28026	NM_010023	Eci1	sense overlapping	1023
chr17:25110227-25113257-	0	0	0	0	3	0	0	0	0	6.58545	6.58545	6.58545	6.58545	10.3801	6.58545	6.58545	6.58545	6.58545	chr17	25110226	25113257	-	17_25250202_25247172_-3030|12.95|12|36	youxintian_mouse28026	NM_027880	Telo2	exonic	598
chr17:25144430-25149294+	0	2	0	0	0	0	0	0	0	6.58545	9.5575	6.58545	6.58545	6.58545	6.58545	6.58545	6.58545	6.58545	chr17	25144429	25149294	+		novel	NM_011930	Clcn7	exonic	678
chr17:25380225-25381573-	0	0	0	0	0	1	0	1	0	6.58545	6.58545	6.58545	6.58545	6.58545	8.79054	6.58545	8.88706	6.58545	chr17	25380224	25381573	-	17_25518518_25517170_-1348|19.70|3|3	youxintian_mouse28026	uc033hbt.1	Cacna1h	exonic	467
chr17:26220281-26226023-	0	0	0	0	0	0	0	0	2	6.58545	6.58545	6.58545	6.58545	6.58545	6.58545	6.58545	6.58545	9.80143	chr17	26220280	26226023	-		novel	NM_001206335	Itfg3	exonic	412
chr17:26257926-26267358+	0	0	0	0	0	0	2	0	0	6.58545	6.58545	6.58545	6.58545	6.58545	6.58545	9.74562	6.58545	6.58545	chr17	26257925	26267358	+	17_26404303_26394871_-9432|20.18|6|6	youxintian_mouse28026	NM_025881	Luc7l	exonic	354
chr17:26266283-26267358+	0	0	0	2	0	5	0	1	1	6.58545	6.58545	6.58545	9.93954	6.58545	10.8376	6.58545	8.88706	8.94889	chr17	26266282	26267358	+	mm9_circ_003008	circBase	NM_025881	Luc7l	exonic	255
chr17:26736789-26763448+	0	5	0	0	0	0	0	0	0	6.58545	10.7647	6.58545	6.58545	6.58545	6.58545	6.58545	6.58545	6.58545	chr17	26736788	26763448	+	17_26900393_26873734_-26659|16.31|19|54	youxintian_mouse28026	NM_029870	Crebrf	exonic	1993
chr17:26736816-26763448+	0	0	0	1	0	0	0	2	0	6.58545	6.58545	6.58545	9.07415	6.58545	6.58545	6.58545	9.73278	6.58545	chr17	26736815	26763448	+	17_26900393_26873761_-26632|12.15|9|12	youxintian_mouse28026	NM_029870	Crebrf	sense overlapping	26633
chr17:26739543-26763448+	3	0	0	7	2	0	3	1	1	10.519	6.58545	6.58545	11.6424	9.84625	6.58545	10.2758	8.88706	8.94889	chr17	26739542	26763448	+	mm9_circ_015157	circBase	NM_029870	Crebrf	exonic	1798
chr17:26757805-26763448+	0	3	0	0	0	0	0	0	1	6.58545	10.0798	6.58545	6.58545	6.58545	6.58545	6.58545	6.58545	8.94889	chr17	26757804	26763448	+	17_26900393_26894750_-5643|15.35|14|30	youxintian_mouse28026	NM_029870	Crebrf	exonic	582
chr17:27450125-27473124-	0	0	0	0	0	3	0	0	0	6.58545	6.58545	6.58545	6.58545	6.58545	10.1502	6.58545	6.58545	6.58545	chr17	27450124	27473124	-	17_27610069_27587070_-22999|15.10|10|22	youxintian_mouse28026	NM_001013385	Grm4	exonic	649
chr17:27487789-27487954-	0	0	0	0	0	0	0	0	0	6.58545	6.58545	6.58545	6.58545	6.58545	6.58545	6.58545	6.58545	6.58545	chr17	27487788	27487954	-		novel	ENSMUST00000118161	Grm4	intronic	166
chr17:28315599-28318407+	0	2	0	0	0	0	0	0	0	6.58545	9.5575	6.58545	6.58545	6.58545	6.58545	6.58545	6.58545	6.58545	chr17	28315598	28318407	+		novel	NR_028296	Fance	exonic	952
chr17:28410510-28441053-	1	0	0	0	0	0	3	1	0	9.11153	6.58545	6.58545	6.58545	6.58545	6.58545	10.2758	8.88706	6.58545	chr17	28410509	28441053	-		novel	NM_010220	Fkbp5	exonic	861
chr17:28428352-28441053-	1	3	2	0	1	3	3	0	0	9.11153	10.0798	10.3404	6.58545	8.98942	10.1502	10.2758	6.58545	6.58545	chr17	28428351	28441053	-	17_28577998_28565297_-12701|19.20|11|21	youxintian_mouse28026	NM_010220	Fkbp5	exonic	529
chr17:28437992-28441053-	0	0	0	0	0	0	2	1	0	6.58545	6.58545	6.58545	6.58545	6.58545	6.58545	9.74562	8.88706	6.58545	chr17	28437991	28441053	-	17_28577998_28574937_-3061|19.30|1|2	youxintian_mouse28026	NM_010220	Fkbp5	exonic	271
chr17:28507236-28507469-	0	0	0	0	0	0	2	0	0	6.58545	6.58545	6.58545	6.58545	6.58545	6.58545	9.74562	6.58545	6.58545	chr17	28507235	28507469	-	17_28644414_28644181_-233|22.22|2|3	youxintian_mouse28026	uc008bra.3	Fkbp5	exonic	234
chr17:28594170-28602853-	0	2	0	0	0	0	0	0	0	6.58545	9.5575	6.58545	6.58545	6.58545	6.58545	6.58545	6.58545	6.58545	chr17	28594169	28602853	-		novel	NM_016795	Srpk1	exonic	1014
chr17:28598902-28608764-	0	0	0	0	0	0	0	0	2	6.58545	6.58545	6.58545	6.58545	6.58545	6.58545	6.58545	6.58545	9.80143	chr17	28598901	28608764	-		novel	NM_016795	Srpk1	exonic	1417
chr17:28713774-28715441+	0	2	1	0	0	1	0	0	0	6.58545	9.5575	9.44345	6.58545	6.58545	8.79054	6.58545	6.58545	6.58545	chr17	28713773	28715441	+	mm9_circ_017753	circBase	NM_011951	Mapk14	exonic	189
chr17:28805929-28807399+	0	2	0	0	2	1	0	0	0	6.58545	9.5575	6.58545	6.58545	9.84625	8.79054	6.58545	6.58545	6.58545	chr17	28805928	28807399	+	17_28944344_28942874_-1470|21.90|10|15	youxintian_mouse28026	NM_001081315	Brpf3	exonic	1471
chr17:28805929-28824066+	0	1	0	0	0	0	2	0	0	6.58545	8.73056	6.58545	6.58545	6.58545	6.58545	9.74562	6.58545	6.58545	chr17	28805928	28824066	+	17_28961011_28942874_-18137|23.38|2|2	youxintian_mouse28026	NM_001081315	Brpf3	exonic	3106
chr17:30135323-30192730+	0	0	0	0	0	0	1	0	0	6.58545	6.58545	6.58545	6.58545	6.58545	6.58545	8.8986	6.58545	6.58545	chr17	30135322	30192730	+	17_30329675_30272268_-57407|17.16|7|13	youxintian_mouse28026	NM_148926	Zfand3	exonic	351
chr17:30513556-30530365-	1	0	0	0	2	1	3	0	3	9.11153	6.58545	6.58545	6.58545	9.84625	8.79054	10.2758	6.58545	10.3337	chr17	30513555	30530365	-	mm9_circ_003671	circBase	NM_027060	Btbd9	exonic	1181
chr17:30704655-30712386+	0	0	1	2	1	0	0	1	0	6.58545	6.58545	9.44345	9.93954	8.98942	6.58545	6.58545	8.88706	6.58545	chr17	30704654	30712386	+	17_30849331_30841600_-7731|12.29|3|78	youxintian_mouse28026	NM_013811	Dnah8	exonic	779
chr17:30773529-30790982+	0	0	1	0	0	0	0	0	0	6.58545	6.58545	9.44345	6.58545	6.58545	6.58545	6.58545	6.58545	6.58545	chr17	30773528	30790982	+	17_30927927_30910474_-17453|15.88|2|7	youxintian_mouse28026	NM_013811	Dnah8	exonic	1415
chr17:30787145-30790982+	0	0	0	0	0	0	0	0	0	6.58545	6.58545	6.58545	6.58545	6.58545	6.58545	6.58545	6.58545	6.58545	chr17	30787144	30790982	+	17_30927927_30924090_-3837|18.84|2|15	youxintian_mouse28026	NM_013811	Dnah8	exonic	312
chr17:31300290-31386356+	0	0	0	0	0	0	0	0	0	6.58545	6.58545	6.58545	6.58545	6.58545	6.58545	6.58545	6.58545	6.58545	chr17	31300289	31386356	+		novel	NM_008804	Pde9a	sense overlapping	86067
chr17:31414101-31420288+	0	0	0	0	0	0	0	0	0	6.58545	6.58545	6.58545	6.58545	6.58545	6.58545	6.58545	6.58545	6.58545	chr17	31414100	31420288	+	17_31557233_31551046_-6187|21.32|10|20	youxintian_mouse28026	NM_008804	Pde9a	exonic	193
chr17:31466355-31473279+	2	0	0	0	0	2	0	0	0	9.98053	6.58545	6.58545	6.58545	6.58545	9.62495	6.58545	6.58545	6.58545	chr17	31466354	31473279	+		novel	NM_008804	Pde9a	exonic	566
chr17:32220161-32225713-	0	0	0	0	0	0	0	2	0	6.58545	6.58545	6.58545	6.58545	6.58545	6.58545	6.58545	9.73278	6.58545	chr17	32220160	32225713	-	17_32362658_32357106_-5552|20.46|4|7	youxintian_mouse28026	NM_020508	Brd4	exonic	1059
chr17:32220161-32229735-	0	0	0	0	0	0	0	2	0	6.58545	6.58545	6.58545	6.58545	6.58545	6.58545	6.58545	9.73278	6.58545	chr17	32220160	32229735	-	17_32366680_32357106_-9574|21.27|1|2	youxintian_mouse28026	NM_020508	Brd4	exonic	1378
chr17:32220161-32242459-	0	0	0	2	0	0	0	0	0	6.58545	6.58545	6.58545	9.93954	6.58545	6.58545	6.58545	6.58545	6.58545	chr17	32220160	32242459	-		novel	NM_020508	Brd4	sense overlapping	22299
chr17:32332479-32345398-	0	0	0	0	0	0	0	0	0	6.58545	6.58545	6.58545	6.58545	6.58545	6.58545	6.58545	6.58545	6.58545	chr17	32332478	32345398	-		novel	NM_017476	Akap8l	exonic	1523
chr17:34124048-34124374+	0	0	0	0	0	0	2	0	0	6.58545	6.58545	6.58545	6.58545	6.58545	6.58545	9.74562	6.58545	6.58545	chr17	34124047	34124374	+		novel	NM_010386	H2-DMa	intronic	327
chr17:34380961-34382488+	20	20	0	12	13	20	21	10	1	13.1734	12.7037	6.58545	12.4019	12.4134	12.7796	12.984	11.9182	8.94889	chr17	34380960	34382488	+		novel	NM_001111094	Btnl1	exonic	558
chr17:34380994-34382126+	1	0	0	0	2	0	2	0	0	9.11153	6.58545	6.58545	6.58545	9.84625	6.58545	9.74562	6.58545	6.58545	chr17	34380993	34382126	+		novel	uc008cby.1	Notch4	intronic	1133
chr17:34474240-34494340-	0	0	0	0	0	0	2	0	0	6.58545	6.58545	6.58545	6.58545	6.58545	6.58545	9.74562	6.58545	6.58545	chr17	34474239	34494340	-		novel	NM_030746	Btnl4	sense overlapping	20101
chr17:35013265-35013747+	0	0	0	0	0	0	0	0	2	6.58545	6.58545	6.58545	6.58545	6.58545	6.58545	6.58545	6.58545	9.80143	chr17	35013264	35013747	+	17_35150692_35150210_-482|16.21|18|60	youxintian_mouse28026	NM_011690	Vars	exonic	231
chr17:35524742-35526469+	0	0	0	0	0	0	0	2	0	6.58545	6.58545	6.58545	6.58545	6.58545	6.58545	6.58545	9.73278	6.58545	chr17	35524741	35526469	+		novel	NM_146248	Cchcr1	sense overlapping	1728
chr17:37054131-37054907+	0	1	0	0	0	0	0	0	0	6.58545	8.73056	6.58545	6.58545	6.58545	6.58545	6.58545	6.58545	6.58545	chr17	37054130	37054907	+	17_37191852_37191076_-776|19.67|9|18	youxintian_mouse28026	NM_019439	Gabbr1	exonic	306
chr17:39844698-39845193+	0	0	0	0	0	2	0	0	0	6.58545	6.58545	6.58545	6.58545	6.58545	9.62495	6.58545	6.58545	6.58545	chr17	39844697	39845193	+	mm9_circ_005915	circBase	NR_046233	Rn45s	sense overlapping	496
chr17:42805160-42820657-	2	0	0	0	0	2	0	0	0	9.98053	6.58545	6.58545	6.58545	6.58545	9.62495	6.58545	6.58545	6.58545	chr17	42805159	42820657	-	17_42957606_42942109_-15497|17.71|3|3	youxintian_mouse28026	NM_009847	Cd2ap	exonic	763
chr17:42805160-42830105-	0	2	0	1	0	0	1	1	0	6.58545	9.5575	6.58545	9.07415	6.58545	6.58545	8.8986	8.88706	6.58545	chr17	42805159	42830105	-		novel	NM_009847	Cd2ap	exonic	1267
chr17:42845326-42852528-	0	2	0	0	4	2	1	4	0	6.58545	9.5575	6.58545	6.58545	10.769	9.62495	8.8986	10.649	6.58545	chr17	42845325	42852528	-	17_42989477_42982275_-7202|15.47|23|123	youxintian_mouse28026	NM_009847	Cd2ap	exonic	315
chr17:43037595-43040189+	0	0	0	0	0	0	0	2	0	6.58545	6.58545	6.58545	6.58545	6.58545	6.58545	6.58545	9.73278	6.58545	chr17	43037594	43040189	+	17_43177138_43174544_-2594|20.34|12|22	youxintian_mouse28026	NM_178589	Tnfrsf21	exonic	1147
chr17:43064968-43065233+	0	0	0	0	2	0	1	0	0	6.58545	6.58545	6.58545	6.58545	9.84625	6.58545	8.8986	6.58545	6.58545	chr17	43064967	43065233	+	17_43202182_43201917_-265|18.17|11|16	youxintian_mouse28026	NM_178589	Tnfrsf21	exonic	266
chr17:45404594-45410938-	0	2	0	0	0	0	0	0	0	6.58545	9.5575	6.58545	6.58545	6.58545	6.58545	6.58545	6.58545	6.58545	chr17	45404593	45410938	-		novel	NM_152810	Cdc5l	exonic	687
chr17:45631788-45633105-	0	0	0	0	0	0	0	0	0	6.58545	6.58545	6.58545	6.58545	6.58545	6.58545	6.58545	6.58545	6.58545	chr17	45631787	45633105	-		novel	NM_001013767	Capn11	exonic	451
chr17:45638695-45639886-	0	0	0	0	0	0	0	0	2	6.58545	6.58545	6.58545	6.58545	6.58545	6.58545	6.58545	6.58545	9.80143	chr17	45638694	45639886	-	17_45776835_45775644_-1191|17.40|2|4	youxintian_mouse28026	NM_001013767	Capn11	exonic	585
chr17:45695482-45698410+	0	0	0	0	0	0	0	0	2	6.58545	6.58545	6.58545	6.58545	6.58545	6.58545	6.58545	6.58545	9.80143	chr17	45695481	45698410	+		novel	NM_026732	Mrpl14	sense overlapping	2929
chr17:46811924-46814038-	2	0	0	0	0	0	0	0	0	9.98053	6.58545	6.58545	6.58545	6.58545	6.58545	6.58545	6.58545	6.58545	chr17	46811923	46814038	-		novel	NM_001100452	Gltscr1l	exonic	207
chr17:47578709-47580516+	0	0	0	1	0	0	2	0	0	6.58545	6.58545	6.58545	9.07415	6.58545	6.58545	9.74562	6.58545	6.58545	chr17	47578708	47580516	+		novel	NM_001081635	Ccnd3	sense overlapping	1808
chr17:49435095-49439606+	0	2	0	0	0	0	0	0	0	6.58545	9.5575	6.58545	6.58545	6.58545	6.58545	6.58545	6.58545	6.58545	chr17	49435094	49439606	+		novel	NM_020042	Mocs1	sense overlapping	4512
chr17:50036941-50055627-	0	3	0	0	0	0	1	0	0	6.58545	10.0798	6.58545	6.58545	6.58545	6.58545	8.8986	6.58545	6.58545	chr17	50036940	50055627	-	17_50194952_50176266_-18686|20.98|19|85	youxintian_mouse28026	NM_181397	Rftn1	exonic	711
chr17:50606295-50611195+	2	3	2	2	5	6	0	2	3	9.98053	10.0798	10.3404	9.93954	11.0749	11.0879	6.58545	9.73278	10.3337	chr17	50606294	50611195	+	mm9_circ_016423	circBase	NM_013880	Plcl2	exonic	2691
chr17:50917527-50920603-	0	4	1	0	0	2	0	0	0	6.58545	10.4625	9.44345	6.58545	6.58545	9.62495	6.58545	6.58545	6.58545	chr17	50917526	50920603	-	17_51059928_51056852_-3076|17.37|14|50	youxintian_mouse28026	NM_028162	Tbc1d5	exonic	383
chr17:50917527-50942668-	0	0	0	0	0	0	0	0	0	6.58545	6.58545	6.58545	6.58545	6.58545	6.58545	6.58545	6.58545	6.58545	chr17	50917526	50942668	-		novel	uc012avg.2	Tbc1d5	intronic	25142
chr17:51767892-51809287-	0	1	0	0	0	0	0	0	0	6.58545	8.73056	6.58545	6.58545	6.58545	6.58545	6.58545	6.58545	6.58545	chr17	51767891	51809287	-	17_51948612_51907217_-41395|19.74|13|55	youxintian_mouse28026	NM_009122	Satb1	exonic	1609
chr17:53497527-53500469+	0	0	0	0	0	0	0	0	0	6.58545	6.58545	6.58545	6.58545	6.58545	6.58545	6.58545	6.58545	6.58545	chr17	53497526	53500469	+		novel	NM_025887	Rab5a	exonic	369
chr17:55662463-55674140-	1	1	0	0	1	0	2	0	4	9.11153	8.73056	6.58545	6.58545	8.98942	6.58545	9.74562	6.58545	10.7216	chr17	55662462	55674140	-	17_55813438_55801761_-11677|17.12|6|9	youxintian_mouse28026	NM_028370	Pot1b	exonic	832
chr17:56351633-56356056+	0	0	0	0	1	0	0	0	0	6.58545	6.58545	6.58545	6.58545	8.98942	6.58545	6.58545	6.58545	6.58545	chr17	56351632	56356056	+	17_56495479_56491056_-4423|21.78|7|26	youxintian_mouse28026	NM_172132	Kdm4b	exonic	650
chr17:56593690-56595714+	0	0	0	2	2	0	0	0	0	6.58545	6.58545	6.58545	9.93954	9.84625	6.58545	6.58545	6.58545	6.58545	chr17	56593689	56595714	+	17_56735137_56733113_-2024|18.48|14|17	youxintian_mouse28026	NM_001163300	Safb	exonic	335
chr17:57406834-57408495+	0	1	0	0	2	0	0	0	0	6.58545	8.73056	6.58545	6.58545	9.84625	6.58545	6.58545	6.58545	6.58545	chr17	57406833	57408495	+	17_57547918_57546257_-1661|16.84|8|10	youxintian_mouse28026	NM_010130	Adgre1	exonic	297
chr17:57406834-57420524+	0	0	0	0	0	0	0	0	5	6.58545	6.58545	6.58545	6.58545	6.58545	6.58545	6.58545	6.58545	11.0271	chr17	57406833	57420524	+	17_57559947_57546257_-13690|14.98|5|6	youxintian_mouse28026	NM_010130	Adgre1	exonic	936
chr17:57419322-57420524+	0	1	0	0	0	0	1	1	0	6.58545	8.73056	6.58545	6.58545	6.58545	6.58545	8.8986	8.88706	6.58545	chr17	57419321	57420524	+	17_57559947_57558745_-1202|12.53|11|14	youxintian_mouse28026	NM_010130	Adgre1	exonic	262
chr17:64624528-64625451+	0	0	0	0	0	0	0	3	2	6.58545	6.58545	6.58545	6.58545	6.58545	6.58545	6.58545	10.2624	9.80143	chr17	64624527	64625451	+	mm9_circ_006640	circBase	NM_008549	Man2a1	exonic	397
chr17:64624528-64659074+	0	0	0	0	0	0	2	0	0	6.58545	6.58545	6.58545	6.58545	6.58545	6.58545	9.74562	6.58545	6.58545	chr17	64624527	64659074	+	17_65008414_64973868_-34546|20.97|10|12	youxintian_mouse28026	NM_008549	Man2a1	exonic	871
chr17:64625307-64636655+	0	0	0	0	0	0	3	0	0	6.58545	6.58545	6.58545	6.58545	6.58545	6.58545	10.2758	6.58545	6.58545	chr17	64625306	64636655	+		novel	NM_008549	Man2a1	exonic	317
chr17:64710704-64714712+	0	0	0	0	3	1	0	0	0	6.58545	6.58545	6.58545	6.58545	10.3801	8.79054	6.58545	6.58545	6.58545	chr17	64710703	64714712	+	mm9_circ_016806	circBase	NM_008549	Man2a1	exonic	626
chr17:65592291-65595054-	1	2	1	2	1	4	0	2	1	9.11153	9.5575	9.44345	9.93954	8.98942	10.5344	6.58545	9.73278	8.94889	chr17	65592290	65595054	-	mm9_circ_014222	circBase	NM_013933	Vapa	exonic	338
chr17:65609426-65609615-	0	0	0	0	2	0	0	0	0	6.58545	6.58545	6.58545	6.58545	9.84625	6.58545	6.58545	6.58545	6.58545	chr17	65609425	65609615	-		novel	ENSMUST00000024897	Vapa	intronic	190
chr17:65803160-65816050+	0	0	0	0	2	2	0	1	0	6.58545	6.58545	6.58545	6.58545	9.84625	9.62495	6.58545	8.88706	6.58545	chr17	65803159	65816050	+	17_66165390_66152500_-12890|16.64|7|13	youxintian_mouse28026	NM_146081	Ppp4r1	exonic	994
chr17:65803211-65803966+	0	0	1	0	0	0	0	0	0	6.58545	6.58545	9.44345	6.58545	6.58545	6.58545	6.58545	6.58545	6.58545	chr17	65803210	65803966	+	17_66153306_66152551_-755|14.52|3|3	youxintian_mouse28026	NM_001114131	Ppp4r1	exonic	192
chr17:65803211-65816050+	0	2	1	0	2	2	0	1	0	6.58545	9.5575	9.44345	6.58545	9.84625	9.62495	6.58545	8.88706	6.58545	chr17	65803210	65816050	+	17_66165390_66152551_-12839|14.78|16|31	youxintian_mouse28026	NM_001114131	Ppp4r1	exonic	943
chr17:65810538-65816050+	0	1	0	0	0	0	0	0	0	6.58545	8.73056	6.58545	6.58545	6.58545	6.58545	6.58545	6.58545	6.58545	chr17	65810537	65816050	+	mm9_circ_008748	circBase	NM_146081	Ppp4r1	exonic	751
chr17:65837684-65838024+	1	0	0	1	0	0	0	0	0	9.11153	6.58545	6.58545	9.07415	6.58545	6.58545	6.58545	6.58545	6.58545	chr17	65837683	65838024	+	17_66187364_66187024_-340|20.56|16|32	youxintian_mouse28026	NM_146081	Ppp4r1	exonic	256
chr17:65857662-65861605-	0	2	0	0	0	0	0	1	0	6.58545	9.5575	6.58545	6.58545	6.58545	6.58545	6.58545	8.88706	6.58545	chr17	65857661	65861605	-		novel	NM_009067	Ralbp1	exonic	644
chr17:65982836-65987493-	0	0	0	0	2	0	0	0	0	6.58545	6.58545	6.58545	6.58545	9.84625	6.58545	6.58545	6.58545	6.58545	chr17	65982835	65987493	-		novel	NM_001025572	Ankrd12	exonic	4658
chr17:66024076-66049933-	0	1	0	0	0	4	1	0	1	6.58545	8.73056	6.58545	6.58545	6.58545	10.5344	8.8986	6.58545	8.94889	chr17	66024075	66049933	-		novel	NM_001025572	Ankrd12	exonic	856
chr17:66024076-66053091-	1	0	0	0	0	4	2	1	0	9.11153	6.58545	6.58545	6.58545	6.58545	10.5344	9.74562	8.88706	6.58545	chr17	66024075	66053091	-	mm9_circ_015645	circBase	NM_001025572	Ankrd12	exonic	994
chr17:66037493-66053091-	0	0	0	0	2	1	0	2	0	6.58545	6.58545	6.58545	6.58545	9.84625	8.79054	6.58545	9.73278	6.58545	chr17	66037492	66053091	-		novel	NM_001025572	Ankrd12	exonic	502
chr17:66049786-66053091-	0	0	0	0	0	2	1	3	0	6.58545	6.58545	6.58545	6.58545	6.58545	9.62495	8.8986	10.2624	6.58545	chr17	66049785	66053091	-		novel	NM_001025572	Ankrd12	exonic	286
chr17:66087403-66089493-	1	2	0	0	0	0	0	0	0	9.11153	9.5575	6.58545	6.58545	6.58545	6.58545	6.58545	6.58545	6.58545	chr17	66087402	66089493	-	17_66438833_66436743_-2090|14.24|14|24	youxintian_mouse28026	NM_028388	Ndufv2	exonic	349
chr17:66436080-66438391-	0	0	0	0	0	0	2	0	0	6.58545	6.58545	6.58545	6.58545	6.58545	6.58545	9.74562	6.58545	6.58545	chr17	66436079	66438391	-	17_66787731_66785420_-2311|19.19|17|61	youxintian_mouse28026	NM_172963	Mtcl1	exonic	384
chr17:66559547-66560020-	2	0	0	0	0	0	0	0	0	9.98053	6.58545	6.58545	6.58545	6.58545	6.58545	6.58545	6.58545	6.58545	chr17	66559546	66560020	-		novel	NM_028998	Themis3	exonic	474
chr17:67287391-67287932-	0	1	0	0	0	0	0	0	0	6.58545	8.73056	6.58545	6.58545	6.58545	6.58545	6.58545	6.58545	6.58545	chr17	67287390	67287932	-		novel	ENSMUST00000037974	Ptprm	intronic	542
chr17:69207859-69210383+	0	3	0	0	0	0	0	0	1	6.58545	10.0798	6.58545	6.58545	6.58545	6.58545	6.58545	6.58545	8.94889	chr17	69207858	69210383	+	mm9_circ_009155	circBase	NM_013813	Epb4.1l3	exonic	416
chr17:71044486-71052775+	0	0	0	0	0	0	0	0	0	6.58545	6.58545	6.58545	6.58545	6.58545	6.58545	6.58545	6.58545	6.58545	chr17	71044485	71052775	+		novel	NM_010867	Myom1	exonic	569
chr17:71224940-71231519+	0	0	0	0	0	0	0	0	0	6.58545	6.58545	6.58545	6.58545	6.58545	6.58545	6.58545	6.58545	6.58545	chr17	71224939	71231519	+		novel	NM_022882	Lpin2	exonic	871
chr17:71436706-71448846-	1	0	0	1	0	0	2	0	0	9.11153	6.58545	6.58545	9.07415	6.58545	6.58545	9.74562	6.58545	6.58545	chr17	71436705	71448846	-	mm9_circ_004742	circBase	NM_028887	Smchd1	exonic	825
chr17:71695697-71701044+	0	0	0	0	0	0	0	0	0	6.58545	6.58545	6.58545	6.58545	6.58545	6.58545	6.58545	6.58545	6.58545	chr17	71695696	71701044	+		novel	NM_177087	Fam179a	exonic	527
chr17:71789868-71810982+	0	1	0	0	0	0	0	0	0	6.58545	8.73056	6.58545	6.58545	6.58545	6.58545	6.58545	6.58545	6.58545	chr17	71789867	71810982	+	17_72160322_72139208_-21114|22.54|16|57	youxintian_mouse28026	NM_030179	Clip4	exonic	1036
chr17:73906010-73907745-	1	3	1	0	0	0	1	0	0	9.11153	10.0798	9.44345	6.58545	6.58545	6.58545	8.8986	6.58545	6.58545	chr17	73906009	73907745	-	17_74257085_74255350_-1735|17.39|7|10	youxintian_mouse28026	NM_011723	Xdh	exonic	434
chr17:74373663-74382040+	2	0	0	0	0	0	0	0	0	9.98053	6.58545	6.58545	6.58545	6.58545	6.58545	6.58545	6.58545	6.58545	chr17	74373662	74382040	+	17_74781380_74773003_-8377|19.62|17|49	youxintian_mouse28026	NM_016962	Spast	exonic	366
chr17:74445130-74453166-	0	0	0	0	0	0	0	0	0	6.58545	6.58545	6.58545	6.58545	6.58545	6.58545	6.58545	6.58545	6.58545	chr17	74445129	74453166	-		novel	NM_001033367	Nlrc4	exonic	2370
chr17:74546237-74562101+	0	0	0	0	0	0	0	2	0	6.58545	6.58545	6.58545	6.58545	6.58545	6.58545	6.58545	9.73278	6.58545	chr17	74546236	74562101	+		novel	NM_007566	Birc6	exonic	709
chr17:74622909-74625239+	0	0	1	3	0	1	0	0	0	6.58545	6.58545	9.44345	10.4767	6.58545	8.79054	6.58545	6.58545	6.58545	chr17	74622908	74625239	+	17_75024579_75022249_-2330|15.25|18|62	youxintian_mouse28026	NM_007566	Birc6	exonic	474
chr17:74626962-74631737+	0	0	0	0	0	2	0	0	0	6.58545	6.58545	6.58545	6.58545	6.58545	9.62495	6.58545	6.58545	6.58545	chr17	74626961	74631737	+	17_75031077_75026302_-4775|19.03|8|11	youxintian_mouse28026	NM_007566	Birc6	exonic	553
chr17:74646469-74655339+	0	0	0	0	0	2	0	0	0	6.58545	6.58545	6.58545	6.58545	6.58545	9.62495	6.58545	6.58545	6.58545	chr17	74646468	74655339	+	17_75054679_75045809_-8870|19.89|9|13	youxintian_mouse28026	NM_007566	Birc6	exonic	2223
chr17:75179037-75227241+	0	0	0	0	0	0	0	0	0	6.58545	6.58545	6.58545	6.58545	6.58545	6.58545	6.58545	6.58545	6.58545	chr17	75179036	75227241	+		novel	NM_019919	Ltbp1	exonic	668
chr17:75225156-75227241+	0	1	0	0	0	0	0	0	0	6.58545	8.73056	6.58545	6.58545	6.58545	6.58545	6.58545	6.58545	6.58545	chr17	75225155	75227241	+	17_75626581_75624496_-2085|22.07|14|34	youxintian_mouse28026	NM_019919	Ltbp1	exonic	500
chr17:78313124-78315746+	1	2	1	0	0	1	0	0	0	9.11153	9.5575	9.44345	6.58545	6.58545	8.79054	6.58545	6.58545	6.58545	chr17	78313123	78315746	+	mm9_circ_015506	circBase	NM_015800	Crim1	exonic	381
chr17:79650302-79659473+	0	3	0	0	2	1	6	4	0	6.58545	10.0798	6.58545	6.58545	9.84625	8.79054	11.2188	10.649	6.58545	chr17	79650301	79659473	+	17_80058813_80049642_-9171|13.67|27|218	youxintian_mouse28026	NM_201361	Rmdn2	exonic	339
chr17:79650302-79672573+	0	0	0	0	0	1	2	0	2	6.58545	6.58545	6.58545	6.58545	6.58545	8.79054	9.74562	6.58545	9.80143	chr17	79650301	79672573	+	17_80071913_80049642_-22271|16.60|18|35	youxintian_mouse28026	NM_201361	Rmdn2	exonic	727
chr17:79864703-79876046-	0	0	0	0	0	0	0	0	0	6.58545	6.58545	6.58545	6.58545	6.58545	6.58545	6.58545	6.58545	6.58545	chr17	79864702	79876046	-	17_80275386_80264043_-11343|20.60|3|3	youxintian_mouse28026	NM_019717	Atl2	exonic	485
chr17:80044494-80053641-	4	1	0	4	4	5	5	1	7	10.9103	8.73056	6.58545	10.8672	10.769	10.8376	10.9673	8.88706	11.4934	chr17	80044493	80053641	-	mm9_circ_018352	circBase	NM_144802	Hnrnpll	exonic	685
chr17:80138013-80150170+	0	0	0	0	0	0	2	0	0	6.58545	6.58545	6.58545	6.58545	6.58545	6.58545	9.74562	6.58545	6.58545	chr17	80138012	80150170	+	17_80549510_80537353_-12157|18.17|2|4	youxintian_mouse28026	NM_176963	Galm	exonic	444
chr17:80204622-80205081-	0	0	0	0	0	0	0	0	0	6.58545	6.58545	6.58545	6.58545	6.58545	6.58545	6.58545	6.58545	6.58545	chr17	80204621	80205081	-		novel	NR_036615	Srsf7	exonic	460
chr17:80270367-80276035-	0	0	0	0	0	0	0	0	2	6.58545	6.58545	6.58545	6.58545	6.58545	6.58545	6.58545	6.58545	9.80143	chr17	80270366	80276035	-	17_80675375_80669707_-5668|16.67|1|2	youxintian_mouse28026	NM_198942	Dhx57	exonic	1326
chr17:80408568-80415105-	0	0	0	0	0	0	0	0	0	6.58545	6.58545	6.58545	6.58545	6.58545	6.58545	6.58545	6.58545	6.58545	chr17	80408567	80415105	-		novel	NM_009231	Sos1	exonic	454
chr17:80445430-80460047-	0	0	0	0	0	1	0	2	1	6.58545	6.58545	6.58545	6.58545	6.58545	8.79054	6.58545	9.73278	8.94889	chr17	80445429	80460047	-	mm9_circ_016460	circBase	NM_009231	Sos1	exonic	987
chr17:80644132-80644845-	0	0	0	0	2	0	0	0	0	6.58545	6.58545	6.58545	6.58545	9.84625	6.58545	6.58545	6.58545	6.58545	chr17	80644131	80644845	-	17_81044185_81043472_-713|17.57|9|11	youxintian_mouse28026	NM_001290345	Map4k3	exonic	388
chr17:80644132-80680925-	0	0	0	3	0	0	0	0	0	6.58545	6.58545	6.58545	10.4767	6.58545	6.58545	6.58545	6.58545	6.58545	chr17	80644131	80680925	-	17_81080265_81043472_-36793|20.73|2|3	youxintian_mouse28026	NM_001290345	Map4k3	exonic	822
chr17:80653862-80655921-	0	0	1	0	0	1	0	1	0	6.58545	6.58545	9.44345	6.58545	6.58545	8.79054	6.58545	8.88706	6.58545	chr17	80653861	80655921	-	mm9_circ_018162	circBase	NM_001290345	Map4k3	exonic	169
chr17:81408067-81444972-	0	0	0	2	2	0	0	0	1	6.58545	6.58545	6.58545	9.93954	9.84625	6.58545	6.58545	6.58545	8.94889	chr17	81408066	81444972	-	17_81844312_81807407_-36905|24.43|2|2	youxintian_mouse28026	NR_104580	Slc8a1	exonic	629
chr17:81408067-81445593-	0	0	2	1	0	1	0	0	0	6.58545	6.58545	10.3404	9.07415	6.58545	8.79054	6.58545	6.58545	6.58545	chr17	81408066	81445593	-	17_81844933_81807407_-37526|20.68|17|175	youxintian_mouse28026	NM_011406	Slc8a1	exonic	737
chr17:81428182-81445593-	0	0	0	0	0	0	1	0	0	6.58545	6.58545	6.58545	6.58545	6.58545	6.58545	8.8986	6.58545	6.58545	chr17	81428181	81445593	-	mm9_circ_000947	circBase	NM_011406	Slc8a1	exonic	461
chr17:81647809-81649638-	11	13	2	7	12	31	18	27	9	12.3232	12.0933	10.3404	11.6424	12.3	13.4049	12.7644	13.3284	11.8452	chr17	81647808	81649638	-	mm9_circ_014302	circBase	NM_011406	Slc8a1	exonic	1830
chr17:83425258-83428248+	0	2	0	0	0	0	0	0	0	6.58545	9.5575	6.58545	6.58545	6.58545	6.58545	6.58545	6.58545	6.58545	chr17	83425257	83428248	+		novel	NM_001114361	Eml4	exonic	362
chr17:83425258-83448255+	0	0	0	0	0	0	2	0	0	6.58545	6.58545	6.58545	6.58545	6.58545	6.58545	9.74562	6.58545	6.58545	chr17	83425257	83448255	+		novel	NM_001114361	Eml4	exonic	913
chr17:83788918-83804597+	0	0	0	0	0	0	0	0	0	6.58545	6.58545	6.58545	6.58545	6.58545	6.58545	6.58545	6.58545	6.58545	chr17	83788917	83804597	+		novel	NM_054082	Mta3	sense overlapping	15680
chr17:84597898-84600782+	0	0	0	0	0	0	1	0	0	6.58545	6.58545	6.58545	6.58545	6.58545	6.58545	8.8986	6.58545	6.58545	chr17	84597897	84600782	+		novel	NM_177606	Plekhh2	exonic	432
chr17:84993680-85005566+	2	3	1	2	0	0	0	4	0	9.98053	10.0798	9.44345	9.93954	6.58545	6.58545	6.58545	10.649	6.58545	chr17	84993679	85005566	+		novel	NM_011151	Ppm1b	exonic	1148
chr17:85003266-85005566+	0	0	0	0	0	0	0	0	1	6.58545	6.58545	6.58545	6.58545	6.58545	6.58545	6.58545	6.58545	8.94889	chr17	85003265	85005566	+		novel	NM_011151	Ppm1b	exonic	288
chr17:86051086-86120049-	0	0	0	0	0	2	0	0	0	6.58545	6.58545	6.58545	6.58545	6.58545	9.62495	6.58545	6.58545	6.58545	chr17	86051085	86120049	-	17_86519389_86450426_-68963|17.07|3|5	youxintian_mouse28026	NM_030133	Srbd1	exonic	880
chr17:86098512-86103000-	3	0	0	3	0	1	0	0	0	10.519	6.58545	6.58545	10.4767	6.58545	8.79054	6.58545	6.58545	6.58545	chr17	86098511	86103000	-	mm9_circ_011841	circBase	NM_030133	Srbd1	exonic	357
chr17:86098512-86120746-	0	3	0	1	0	2	0	2	0	6.58545	10.0798	6.58545	9.07415	6.58545	9.62495	6.58545	9.73278	6.58545	chr17	86098511	86120746	-	mm9_circ_004411	circBase	NM_030133	Srbd1	exonic	802
chr17:86102843-86120746-	0	0	0	0	0	0	0	0	2	6.58545	6.58545	6.58545	6.58545	6.58545	6.58545	6.58545	6.58545	9.80143	chr17	86102842	86120746	-	17_86520086_86502183_-17903|16.65|2|3	youxintian_mouse28026	NM_030133	Srbd1	exonic	603
chr17:86474317-86476891+	0	0	2	0	0	0	0	0	0	6.58545	6.58545	10.3404	6.58545	6.58545	6.58545	6.58545	6.58545	6.58545	chr17	86474316	86476891	+	17_86876231_86873657_-2574|19.36|15|79	youxintian_mouse28026	NM_011104	Prkce	exonic	281
chr17:86488160-86496111+	0	4	0	1	1	3	0	2	2	6.58545	10.4625	6.58545	9.07415	8.98942	10.1502	6.58545	9.73278	9.80143	chr17	86488159	86496111	+	mm9_circ_003451	circBase	NM_011104	Prkce	exonic	614
chr17:87306929-87323187+	0	0	0	0	0	0	2	0	0	6.58545	6.58545	6.58545	6.58545	6.58545	6.58545	9.74562	6.58545	6.58545	chr17	87306928	87323187	+		novel	NM_028639	Ttc7	exonic	548
chr17:87643542-87646340+	2	2	0	0	1	1	3	0	0	9.98053	9.5575	6.58545	6.58545	8.98942	8.79054	10.2758	6.58545	6.58545	chr17	87643541	87646340	+		novel	NM_008532	Epcam	exonic	306
chr17:87646137-87649658+	1	0	0	0	2	0	0	0	0	9.11153	6.58545	6.58545	6.58545	9.84625	6.58545	6.58545	6.58545	6.58545	chr17	87646136	87649658	+		novel	NM_008532	Epcam	exonic	249
chr17:88008594-88011376-	0	0	0	2	0	0	0	0	3	6.58545	6.58545	6.58545	9.93954	6.58545	6.58545	6.58545	6.58545	10.3337	chr17	88008593	88011376	-	mm9_circ_010837	circBase	NM_001081034	Fbxo11	exonic	681
chr17:88008594-88015712-	0	2	0	0	0	1	0	0	0	6.58545	9.5575	6.58545	6.58545	6.58545	8.79054	6.58545	6.58545	6.58545	chr17	88008593	88015712	-	17_88415052_88407934_-7118|22.40|14|29	youxintian_mouse28026	NM_001081034	Fbxo11	exonic	1163
chr17:88008816-88009121-	0	4	0	0	0	0	0	0	0	6.58545	10.4625	6.58545	6.58545	6.58545	6.58545	6.58545	6.58545	6.58545	chr17	88008815	88009121	-		novel	NM_001081034	Fbxo11	exonic	219
chr18:5046589-5049494+	0	2	0	0	0	0	0	1	0	6.58545	9.5575	6.58545	6.58545	6.58545	6.58545	6.58545	8.88706	6.58545	chr18	5046588	5049494	+	18_5049492_5046587_-2905|17.63|6|7	youxintian_mouse28026	NM_153153	Svil	exonic	820
chr18:5055980-5056849+	0	0	0	0	0	0	0	2	0	6.58545	6.58545	6.58545	6.58545	6.58545	6.58545	6.58545	9.73278	6.58545	chr18	5055979	5056849	+		novel	NM_153153	Svil	exonic	870
chr18:5086535-5088814+	0	0	0	0	0	0	2	0	0	6.58545	6.58545	6.58545	6.58545	6.58545	6.58545	9.74562	6.58545	6.58545	chr18	5086534	5088814	+		novel	NM_153153	Svil	exonic	355
chr18:5633204-5641518+	1	0	0	0	0	0	0	0	0	9.11153	6.58545	6.58545	6.58545	6.58545	6.58545	6.58545	6.58545	6.58545	chr18	5633203	5641518	+	18_5641516_5633202_-8314|11.30|17|34	youxintian_mouse28026	ENSMUST00000025081	Zeb1	intronic	8315
chr18:5633204-5705243+	0	1	1	0	0	1	1	0	0	6.58545	8.73056	9.44345	6.58545	6.58545	8.79054	8.8986	6.58545	6.58545	chr18	5633203	5705243	+	18_5705241_5633202_-72039|12.53|19|120	youxintian_mouse28026	NM_011546	Zeb1	sense overlapping	72040
chr18:5705043-5761433+	0	0	0	0	0	0	0	0	0	6.58545	6.58545	6.58545	6.58545	6.58545	6.58545	6.58545	6.58545	6.58545	chr18	5705042	5761433	+		novel	NM_011546	Zeb1	exonic	672
chr18:5705043-5773094+	0	0	1	0	0	0	0	0	0	6.58545	6.58545	9.44345	6.58545	6.58545	6.58545	6.58545	6.58545	6.58545	chr18	5705042	5773094	+	18_5773092_5705041_-68051|13.10|7|16	youxintian_mouse28026	NM_011546	Zeb1	sense overlapping	68052
chr18:6061847-6070091-	0	0	0	3	0	1	1	0	0	6.58545	6.58545	6.58545	10.4767	6.58545	8.79054	8.8986	6.58545	6.58545	chr18	6061846	6070091	-	18_6070089_6061845_-8244|19.67|20|68	youxintian_mouse28026	NM_029277	Arhgap12	exonic	609
chr18:6111685-6115850-	4	11	8	2	10	8	5	7	7	10.9103	11.8581	12.2579	9.93954	12.0424	11.487	10.9673	11.4189	11.4934	chr18	6111684	6115850	-	mm9_circ_014015	circBase	NM_029277	Arhgap12	exonic	792
chr18:7901496-7906044+	0	2	1	2	2	1	0	2	2	6.58545	9.5575	9.44345	9.93954	9.84625	8.79054	6.58545	9.73278	9.80143	chr18	7901495	7906044	+	18_7906042_7901494_-4548|16.21|16|23	youxintian_mouse28026	NM_153085	Wac	exonic	336
chr18:7905400-7910824+	0	0	0	0	0	0	0	0	0	6.58545	6.58545	6.58545	6.58545	6.58545	6.58545	6.58545	6.58545	6.58545	chr18	7905399	7910824	+		novel	NM_153085	Wac	exonic	538
chr18:9319409-9353507-	0	2	0	0	0	0	0	0	0	6.58545	9.5575	6.58545	6.58545	6.58545	6.58545	6.58545	6.58545	6.58545	chr18	9319408	9353507	-	18_9353505_9319407_-34098|17.80|3|4	youxintian_mouse28026	NM_026484	Ccny	exonic	645
chr18:9332784-9353507-	1	0	0	0	0	0	0	0	0	9.11153	6.58545	6.58545	6.58545	6.58545	6.58545	6.58545	6.58545	6.58545	chr18	9332783	9353507	-	18_9353505_9332782_-20723|15.83|6|10	youxintian_mouse28026	NM_026484	Ccny	exonic	482
chr18:9437521-9438275-	0	1	0	1	2	4	4	0	0	6.58545	8.73056	6.58545	9.07415	9.84625	10.5344	10.6626	6.58545	6.58545	chr18	9437520	9438275	-		novel	uc012azd.1	Ccny	intronic	755
chr18:10067471-10132272-	0	0	0	0	0	0	2	0	0	6.58545	6.58545	6.58545	6.58545	6.58545	6.58545	9.74562	6.58545	6.58545	chr18	10067470	10132272	-		novel	NM_009071	Rock1	exonic	3386
chr18:10119885-10132272-	1	0	0	0	0	1	0	0	3	9.11153	6.58545	6.58545	6.58545	6.58545	8.79054	6.58545	6.58545	10.3337	chr18	10119884	10132272	-	18_10132270_10119883_-12387|12.61|5|5	youxintian_mouse28026	NM_009071	Rock1	exonic	597
chr18:10129305-10132272-	1	0	0	0	1	1	0	1	1	9.11153	6.58545	6.58545	6.58545	8.98942	8.79054	6.58545	8.88706	8.94889	chr18	10129304	10132272	-	mm9_circ_009280	circBase	NM_009071	Rock1	exonic	376
chr18:10574875-10586041-	0	1	0	0	0	1	2	2	1	6.58545	8.73056	6.58545	6.58545	6.58545	8.79054	9.74562	9.73278	8.94889	chr18	10574874	10586041	-	18_10586039_10574873_-11166|16.54|20|67	youxintian_mouse28026	NM_001081222	Esco1	exonic	545
chr18:10582055-10586041-	3	4	0	2	0	3	4	1	3	10.519	10.4625	6.58545	9.93954	6.58545	10.1502	10.6626	8.88706	10.3337	chr18	10582054	10586041	-	mm9_circ_013066	circBase	NM_001081222	Esco1	exonic	311
chr18:10582055-10595875-	0	0	0	0	2	0	0	0	0	6.58545	6.58545	6.58545	6.58545	9.84625	6.58545	6.58545	6.58545	6.58545	chr18	10582054	10595875	-	18_10595873_10582053_-13820|20.59|9|19	youxintian_mouse28026	NM_001081222	Esco1	exonic	2553
chr18:10760804-10778300+	0	0	0	0	0	0	0	0	2	6.58545	6.58545	6.58545	6.58545	6.58545	6.58545	6.58545	6.58545	9.80143	chr18	10760803	10778300	+	18_10778298_10760802_-17496|16.58|1|2	youxintian_mouse28026	NM_144860	Mib1	exonic	737
chr18:10804687-10808134+	0	0	0	0	0	0	0	0	0	6.58545	6.58545	6.58545	6.58545	6.58545	6.58545	6.58545	6.58545	6.58545	chr18	10804686	10808134	+		novel	NM_144860	Mib1	exonic	215
chr18:11660735-11696809+	0	0	0	0	0	0	0	0	0	6.58545	6.58545	6.58545	6.58545	6.58545	6.58545	6.58545	6.58545	6.58545	chr18	11660734	11696809	+		novel	NR_045526	Rbbp8	exonic	526
chr18:12083992-12106003-	0	0	0	0	0	2	0	0	0	6.58545	6.58545	6.58545	6.58545	6.58545	9.62495	6.58545	6.58545	6.58545	chr18	12083991	12106003	-		novel	uc008ebx.2	Tmem241	exonic	310
chr18:13715141-13717747-	0	1	2	0	1	1	2	0	0	6.58545	8.73056	10.3404	6.58545	8.98942	8.79054	9.74562	6.58545	6.58545	chr18	13715140	13717747	-	18_13876256_13873650_-2606|19.58|9|14	youxintian_mouse28026	NM_145492	Zfp521	exonic	248
chr18:13938962-13939141-	0	0	0	0	2	0	0	0	0	6.58545	6.58545	6.58545	6.58545	9.84625	6.58545	6.58545	6.58545	6.58545	chr18	13938961	13939141	-	18_14097650_14097471_-179|15.43|5|5	youxintian_mouse28026	NM_145492	Zfp521	exonic	180
chr18:20574940-20579478+	0	0	0	0	0	0	0	0	2	6.58545	6.58545	6.58545	6.58545	6.58545	6.58545	6.58545	6.58545	9.80143	chr18	20574939	20579478	+		novel	NM_007883	Dsg2	exonic	442
chr18:20841528-20885257-	0	0	0	0	0	0	0	0	0	6.58545	6.58545	6.58545	6.58545	6.58545	6.58545	6.58545	6.58545	6.58545	chr18	20841527	20885257	-		novel	NM_177038	Trappc8	exonic	2588
chr18:20863468-20866206-	0	0	0	0	0	0	0	0	2	6.58545	6.58545	6.58545	6.58545	6.58545	6.58545	6.58545	6.58545	9.80143	chr18	20863467	20866206	-		novel	NM_029491	Trappc8	exonic	524
chr18:20873883-20885257-	0	2	0	0	0	1	0	0	0	6.58545	9.5575	6.58545	6.58545	6.58545	8.79054	6.58545	6.58545	6.58545	chr18	20873882	20885257	-		novel	NM_029491	Trappc8	exonic	460
chr18:21010677-21020999+	0	0	0	0	1	0	0	0	0	6.58545	6.58545	6.58545	6.58545	8.98942	6.58545	6.58545	6.58545	6.58545	chr18	21010676	21020999	+	18_21179500_21169178_-10322|14.79|18|62	youxintian_mouse28026	NM_019706	Rnf138	exonic	285
chr18:21075651-21084196+	0	0	0	0	0	0	0	0	3	6.58545	6.58545	6.58545	6.58545	6.58545	6.58545	6.58545	6.58545	10.3337	chr18	21075650	21084196	+		novel	NM_008586	Mep1b	exonic	289
chr18:21147732-21148904-	0	1	2	0	0	0	4	0	0	6.58545	8.73056	10.3404	6.58545	6.58545	6.58545	10.6626	6.58545	6.58545	chr18	21147731	21148904	-	18_21307405_21306233_-1172|15.10|12|20	youxintian_mouse28026	NM_001033445	Garem	exonic	1173
chr18:22375133-22434675+	3	0	0	0	0	1	0	0	0	10.519	6.58545	6.58545	6.58545	6.58545	8.79054	6.58545	6.58545	6.58545	chr18	22375132	22434675	+	mm9_circ_002563	circBase	NM_001167777	Asxl3	exonic	635
chr18:23583084-23602674+	0	0	0	0	0	0	0	0	0	6.58545	6.58545	6.58545	6.58545	6.58545	6.58545	6.58545	6.58545	6.58545	chr18	23583083	23602674	+	mm9_circ_003801	circBase	NM_010087	Dtna	exonic	723
chr18:24506834-24509922-	0	0	0	0	0	0	0	0	1	6.58545	6.58545	6.58545	6.58545	6.58545	6.58545	6.58545	6.58545	8.94889	chr18	24506833	24509922	-	18_24668423_24665335_-3088|12.40|8|8	youxintian_mouse28026	NM_144861	Rprd1a	exonic	638
chr18:25339714-25344962+	1	0	1	0	2	3	3	1	3	9.11153	6.58545	9.44345	6.58545	9.84625	10.1502	10.2758	8.88706	10.3337	chr18	25339713	25344962	+	mm9_circ_011455	circBase	NM_001033532	AW554918	exonic	770
chr18:30281957-30298758+	0	0	0	0	0	0	0	0	2	6.58545	6.58545	6.58545	6.58545	6.58545	6.58545	6.58545	6.58545	9.80143	chr18	30281956	30298758	+	18_30458412_30441611_-16801|13.97|1|3	youxintian_mouse28026	NM_181414	Pik3c3	exonic	769
chr18:31594577-31602800-	0	2	0	0	0	0	0	0	0	6.58545	9.5575	6.58545	6.58545	6.58545	6.58545	6.58545	6.58545	6.58545	chr18	31594576	31602800	-	18_31762454_31754231_-8223|17.77|8|13	youxintian_mouse28026	NM_026165	Slc25a46	exonic	294
chr18:31666341-31667009+	0	0	0	0	0	1	0	0	0	6.58545	6.58545	6.58545	6.58545	6.58545	8.79054	6.58545	6.58545	6.58545	chr18	31666340	31667009	+	18_31826663_31825995_-668|18.77|9|13	youxintian_mouse28026	NM_172965	Sap130	exonic	344
chr18:31689398-31698880+	0	0	0	0	0	0	0	2	0	6.58545	6.58545	6.58545	6.58545	6.58545	6.58545	6.58545	9.73278	6.58545	chr18	31689397	31698880	+	18_31858534_31849052_-9482|20.13|1|2	youxintian_mouse28026	NM_172965	Sap130	exonic	464
chr18:31698522-31698880+	0	0	0	0	0	0	0	0	0	6.58545	6.58545	6.58545	6.58545	6.58545	6.58545	6.58545	6.58545	6.58545	chr18	31698521	31698880	+		novel	NM_172965	Sap130	exonic	359
chr18:31827262-31829979+	0	1	0	0	0	1	2	0	0	6.58545	8.73056	6.58545	6.58545	6.58545	8.79054	9.74562	6.58545	6.58545	chr18	31827261	31829979	+	18_31989633_31986916_-2717|21.15|5|6	youxintian_mouse28026	NM_028866	Wdr33	exonic	401
chr18:31827262-31835481+	0	1	0	1	0	1	0	0	0	6.58545	8.73056	6.58545	9.07415	6.58545	8.79054	6.58545	6.58545	6.58545	chr18	31827261	31835481	+	mm9_circ_013051	circBase	NM_028866	Wdr33	exonic	747
chr18:32005431-32013445-	1	6	0	0	0	0	0	0	0	9.11153	11.0144	6.58545	6.58545	6.58545	6.58545	6.58545	6.58545	6.58545	chr18	32005430	32013445	-		novel	NM_032394	Myo7b	exonic	564
chr18:32181864-32196958+	0	2	0	0	0	0	0	0	0	6.58545	9.5575	6.58545	6.58545	6.58545	6.58545	6.58545	6.58545	6.58545	chr18	32181863	32196958	+		novel	NM_011946	Map3k2	sense overlapping	15095
chr18:32861027-32863262+	0	0	0	2	0	0	0	3	1	6.58545	6.58545	6.58545	9.93954	6.58545	6.58545	6.58545	10.2624	8.94889	chr18	32861026	32863262	+	18_33022916_33020681_-2235|16.23|15|29	youxintian_mouse28026	NM_001110015	Wdr36	exonic	446
chr18:33077993-33129833+	0	1	2	0	0	0	0	1	0	6.58545	8.73056	10.3404	6.58545	6.58545	6.58545	6.58545	8.88706	6.58545	chr18	33077992	33129833	+	18_33289487_33237647_-51840|16.84|14|41	youxintian_mouse28026	NM_009793	Camk4	exonic	298
chr18:33921830-33929764-	0	0	0	0	0	0	0	0	2	6.58545	6.58545	6.58545	6.58545	6.58545	6.58545	6.58545	6.58545	9.80143	chr18	33921829	33929764	-	18_34089418_34081484_-7934|11.25|6|9	youxintian_mouse28026	NM_013512	Epb4.1l4a	sense overlapping	7935
chr18:34261005-34306379+	0	0	0	0	0	0	0	0	0	6.58545	6.58545	6.58545	6.58545	6.58545	6.58545	6.58545	6.58545	6.58545	chr18	34261004	34306379	+		novel	NM_007462	Apc	exonic	1755
chr18:34494157-34498159-	0	0	0	0	0	0	0	0	2	6.58545	6.58545	6.58545	6.58545	6.58545	6.58545	6.58545	6.58545	9.80143	chr18	34494156	34498159	-	18_34657813_34653811_-4002|17.89|10|16	youxintian_mouse28026	NM_146084	Fam13b	exonic	725
chr18:34497334-34498159-	0	0	0	1	0	0	1	0	0	6.58545	6.58545	6.58545	9.07415	6.58545	6.58545	8.8986	6.58545	6.58545	chr18	34497333	34498159	-	18_34657813_34656988_-825|17.21|3|4	youxintian_mouse28026	NM_146084	Fam13b	exonic	405
chr18:34614448-34614797-	0	0	1	0	3	0	1	0	0	6.58545	6.58545	9.44345	6.58545	10.3801	6.58545	8.8986	6.58545	6.58545	chr18	34614447	34614797	-	18_34774451_34774102_-349|18.12|6|7	youxintian_mouse28026	NM_030147	Brd8	exonic	173
chr18:34803450-34813561+	0	0	0	0	0	0	0	0	2	6.58545	6.58545	6.58545	6.58545	6.58545	6.58545	6.58545	6.58545	9.80143	chr18	34803449	34813561	+	18_34973215_34963104_-10111|19.45|5|6	youxintian_mouse28026	NM_001081256	Kdm3b	exonic	2419
chr18:35152601-35154540+	2	2	1	0	1	2	1	3	7	9.98053	9.5575	9.44345	6.58545	8.98942	9.62495	8.8986	10.2624	11.4934	chr18	35152600	35154540	+	mm9_circ_007547	circBase	NM_009818	Ctnna1	exonic	303
chr18:35222065-35223575+	0	2	1	0	0	0	1	1	1	6.58545	9.5575	9.44345	6.58545	6.58545	6.58545	8.8986	8.88706	8.94889	chr18	35222064	35223575	+	18_35383229_35381719_-1510|17.22|6|8	youxintian_mouse28026	NM_009818	Ctnna1	exonic	234
chr18:35341098-35438380-	0	0	0	0	0	0	0	2	0	6.58545	6.58545	6.58545	6.58545	6.58545	6.58545	6.58545	9.73278	6.58545	chr18	35341097	35438380	-		novel	NM_030749	Sil1	exonic	474
chr18:35584515-35584881+	0	0	1	0	0	0	1	2	0	6.58545	6.58545	9.44345	6.58545	6.58545	6.58545	8.8986	9.73278	6.58545	chr18	35584514	35584881	+		novel	NM_010771	Matr3	exonic	367
chr18:35587631-35588453+	0	0	0	0	0	0	0	0	0	6.58545	6.58545	6.58545	6.58545	6.58545	6.58545	6.58545	6.58545	6.58545	chr18	35587630	35588453	+	18_35748107_35747285_-822|12.39|3|3	youxintian_mouse28026	NM_010771	Matr3	exonic	345
chr18:35610871-35613502+	1	4	4	1	2	2	1	10	2	9.11153	10.4625	11.2859	9.07415	9.84625	9.62495	8.8986	11.9182	9.80143	chr18	35610870	35613502	+	mm9_circ_015464	circBase	NM_026420	Paip2	exonic	344
chr18:35613323-35613502+	1	0	0	0	0	0	2	0	0	9.11153	6.58545	6.58545	6.58545	6.58545	6.58545	9.74562	6.58545	6.58545	chr18	35613322	35613502	+		novel	NM_026420	Paip2	exonic	180
chr18:35793465-35801367+	3	5	7	2	2	9	4	5	4	10.519	10.7647	12.0693	9.93954	9.84625	11.6515	10.6626	10.9535	10.7216	chr18	35793464	35801367	+		novel	NM_019912	Ube2d2a	exonic	374
chr18:36575019-36594322+	2	0	0	0	0	0	0	0	0	9.98053	6.58545	6.58545	6.58545	6.58545	6.58545	6.58545	6.58545	6.58545	chr18	36575018	36594322	+		novel	NM_175375	Ankhd1	exonic	1171
chr18:36575019-36600875+	0	0	0	0	0	0	0	3	0	6.58545	6.58545	6.58545	6.58545	6.58545	6.58545	6.58545	10.2624	6.58545	chr18	36575018	36600875	+	18_36760529_36734673_-25856|11.41|8|10	youxintian_mouse28026	NM_175375	Ankhd1	exonic	1473
chr18:36578618-36613976+	0	0	0	0	0	2	0	0	0	6.58545	6.58545	6.58545	6.58545	6.58545	9.62495	6.58545	6.58545	6.58545	chr18	36578617	36613976	+		novel	NM_175375	Ankhd1	exonic	1682
chr18:36581068-36583759+	0	0	0	2	0	0	0	0	0	6.58545	6.58545	6.58545	9.93954	6.58545	6.58545	6.58545	6.58545	6.58545	chr18	36581067	36583759	+	18_36743413_36740722_-2691|16.42|7|9	youxintian_mouse28026	NM_175375	Ankhd1	exonic	296
chr18:36611800-36614817+	0	0	0	3	0	0	0	0	0	6.58545	6.58545	6.58545	10.4767	6.58545	6.58545	6.58545	6.58545	6.58545	chr18	36611799	36614817	+	18_36774471_36771454_-3017|19.79|10|16	youxintian_mouse28026	NM_175375	Ankhd1	exonic	463
chr18:36638205-36638708+	0	0	0	0	0	0	0	0	0	6.58545	6.58545	6.58545	6.58545	6.58545	6.58545	6.58545	6.58545	6.58545	chr18	36638204	36638708	+	18_36798362_36797859_-503|12.07|5|10	youxintian_mouse28026	NM_175375	Ankhd1	exonic	339
chr18:36646691-36648740+	0	0	0	0	0	0	0	0	0	6.58545	6.58545	6.58545	6.58545	6.58545	6.58545	6.58545	6.58545	6.58545	chr18	36646690	36648740	+	18_36808394_36806345_-2049|17.58|11|17	youxintian_mouse28026	NM_175375	Ankhd1	exonic	1760
chr18:36673328-36673629-	4	0	0	0	0	0	0	0	0	10.9103	6.58545	6.58545	6.58545	6.58545	6.58545	6.58545	6.58545	6.58545	chr18	36673327	36673629	-		novel	ENSMUST00000001415	Apbb3	intronic	302
chr18:36747348-36751267+	0	0	0	0	0	0	0	2	0	6.58545	6.58545	6.58545	6.58545	6.58545	6.58545	6.58545	9.73278	6.58545	chr18	36747347	36751267	+	18_36910921_36907002_-3919|20.72|8|10	youxintian_mouse28026	NM_011879	Ik	exonic	718
chr18:38330486-38330660-	0	2	0	0	4	0	0	0	0	6.58545	9.5575	6.58545	6.58545	10.769	6.58545	6.58545	6.58545	6.58545	chr18	38330485	38330660	-		novel	NM_011937	Gnpda1	exonic	175
chr18:39097630-39111900+	0	2	0	0	0	0	1	1	0	6.58545	9.5575	6.58545	6.58545	6.58545	6.58545	8.8986	8.88706	6.58545	chr18	39097629	39111900	+	mm9_circ_018468	circBase	NM_175164	Arhgap26	exonic	443
chr18:39120119-39132150+	0	0	0	0	0	0	3	2	0	6.58545	6.58545	6.58545	6.58545	6.58545	6.58545	10.2758	9.73278	6.58545	chr18	39120118	39132150	+	18_39291804_39279773_-12031|23.41|15|42	youxintian_mouse28026	NM_175164	Arhgap26	exonic	431
chr18:39120119-39150118+	0	3	1	3	0	2	9	9	2	6.58545	10.0798	9.44345	10.4767	6.58545	9.62495	11.7842	11.7702	9.80143	chr18	39120118	39150118	+	mm9_circ_017413	circBase	NM_175164	Arhgap26	exonic	510
chr18:39126833-39150118+	0	1	0	0	0	2	2	0	0	6.58545	8.73056	6.58545	6.58545	6.58545	9.62495	9.74562	6.58545	6.58545	chr18	39126832	39150118	+	mm9_circ_013976	circBase	NM_175164	Arhgap26	exonic	275
chr18:39227368-39246924+	0	1	0	0	0	0	0	0	0	6.58545	8.73056	6.58545	6.58545	6.58545	6.58545	6.58545	6.58545	6.58545	chr18	39227367	39246924	+	mm9_circ_013712	circBase	NM_175164	Arhgap26	exonic	394
chr18:41932601-41937691-	3	0	0	0	0	0	1	0	2	10.519	6.58545	6.58545	6.58545	6.58545	6.58545	8.8986	6.58545	9.80143	chr18	41932600	41937691	-	18_42097345_42092255_-5090|19.82|5|7	youxintian_mouse28026	NM_029942	Prelid2	exonic	293
chr18:42320764-42324198+	1	4	3	0	3	1	1	2	2	9.11153	10.4625	10.8892	6.58545	10.3801	8.79054	8.8986	9.73278	9.80143	chr18	42320763	42324198	+	18_42483852_42480418_-3434|15.08|12|15	youxintian_mouse28026	NM_172626	Rbm27	exonic	595
chr18:42320764-42326024+	1	0	0	0	0	1	3	0	0	9.11153	6.58545	6.58545	6.58545	6.58545	8.79054	10.2758	6.58545	6.58545	chr18	42320763	42326024	+	18_42485678_42480418_-5260|16.00|19|73	youxintian_mouse28026	NM_172626	Rbm27	exonic	715
chr18:42519368-42523066+	0	0	0	0	0	0	1	1	0	6.58545	6.58545	6.58545	6.58545	6.58545	6.58545	8.8986	8.88706	6.58545	chr18	42519367	42523066	+		novel	NR_110344	Tcerg1	exonic	379
chr18:42519368-42530890+	0	0	0	0	0	0	0	0	0	6.58545	6.58545	6.58545	6.58545	6.58545	6.58545	6.58545	6.58545	6.58545	chr18	42519367	42530890	+	mm9_circ_018078	circBase	NR_110344	Tcerg1	exonic	1082
chr18:43391530-43391689-	0	0	0	0	0	0	0	0	0	6.58545	6.58545	6.58545	6.58545	6.58545	6.58545	6.58545	6.58545	6.58545	chr18	43391529	43391689	-		novel	ENSMUST00000025379	Dpysl3	intronic	160
chr18:44405210-44405760+	0	4	0	0	0	2	2	0	0	6.58545	10.4625	6.58545	6.58545	6.58545	9.62495	9.74562	6.58545	6.58545	chr18	44405209	44405760	+	18_44565414_44564864_-550|15.69|17|55	youxintian_mouse28026	NM_027490	Dcp2	exonic	374
chr18:46754371-46758114+	0	1	0	0	1	1	0	0	0	6.58545	8.73056	6.58545	6.58545	8.98942	8.79054	6.58545	6.58545	6.58545	chr18	46754370	46758114	+		novel	NM_009681	Ap3s1	exonic	204
chr18:52905805-52907477+	0	0	0	0	0	0	0	0	0	6.58545	6.58545	6.58545	6.58545	6.58545	6.58545	6.58545	6.58545	6.58545	chr18	52905804	52907477	+		novel	NM_026408	Sncaip	exonic	1153
chr18:54946553-54946808-	1	0	0	0	0	1	2	1	2	9.11153	6.58545	6.58545	6.58545	6.58545	8.79054	9.74562	8.88706	9.80143	chr18	54946552	54946808	-	mm9_circ_004897	circBase	NM_175751	Zfp608	exonic	256
chr18:54987611-54988706-	0	3	0	0	0	0	0	0	0	6.58545	10.0798	6.58545	6.58545	6.58545	6.58545	6.58545	6.58545	6.58545	chr18	54987610	54988706	-	18_55148360_55147265_-1095|21.56|12|21	youxintian_mouse28026	NM_175751	Zfp608	exonic	1096
chr18:56807664-56812075-	0	0	1	0	0	0	0	0	0	6.58545	6.58545	9.44345	6.58545	6.58545	6.58545	6.58545	6.58545	6.58545	chr18	56807663	56812075	-	18_56971729_56967318_-4411|16.91|16|25	youxintian_mouse28026	NM_177115	March3	exonic	449
chr18:57897344-57921886+	0	0	0	0	0	0	0	0	2	6.58545	6.58545	6.58545	6.58545	6.58545	6.58545	6.58545	6.58545	9.80143	chr18	57897343	57921886	+		novel	NM_009194	Slc12a2	exonic	1740
chr18:57906105-57910208+	0	0	0	2	0	0	0	0	0	6.58545	6.58545	6.58545	9.93954	6.58545	6.58545	6.58545	6.58545	6.58545	chr18	57906104	57910208	+		novel	ENSMUST00000115366	Slc12a2	intronic	4104
chr18:57912837-57921886+	1	0	0	2	0	0	0	0	2	9.11153	6.58545	6.58545	9.93954	6.58545	6.58545	6.58545	6.58545	9.80143	chr18	57912836	57921886	+	18_58081540_58072491_-9049|18.25|5|5	youxintian_mouse28026	NM_009194	Slc12a2	exonic	611
chr18:59306165-59317609+	0	0	0	0	0	0	0	0	0	6.58545	6.58545	6.58545	6.58545	6.58545	6.58545	6.58545	6.58545	6.58545	chr18	59306164	59317609	+		novel	ENSMUST00000080721	Chsy3	intronic	11445
chr18:62437383-62437951+	0	0	0	0	0	0	0	0	0	6.58545	6.58545	6.58545	6.58545	6.58545	6.58545	6.58545	6.58545	6.58545	chr18	62437382	62437951	+	18_62597605_62597037_-568|21.59|3|3	youxintian_mouse28026	NM_008313	Htr4	exonic	569
chr18:63071108-63071393-	0	0	0	0	0	0	0	0	0	6.58545	6.58545	6.58545	6.58545	6.58545	6.58545	6.58545	6.58545	6.58545	chr18	63071107	63071393	-		novel	ENSMUST00000047480	Piezo2	intronic	286
chr18:63924812-63935948+	0	0	0	2	0	0	0	0	0	6.58545	6.58545	6.58545	9.93954	6.58545	6.58545	6.58545	6.58545	6.58545	chr18	63924811	63935948	+		novel	NM_001014981	Wdr7	exonic	451
chr18:64545117-64564551-	0	0	0	0	0	0	0	0	0	6.58545	6.58545	6.58545	6.58545	6.58545	6.58545	6.58545	6.58545	6.58545	chr18	64545116	64564551	-		novel	NM_001001488	Atp8b1	exonic	1487
chr18:64555114-64605400-	0	0	0	0	2	0	0	0	0	6.58545	6.58545	6.58545	6.58545	9.84625	6.58545	6.58545	6.58545	6.58545	chr18	64555113	64605400	-		novel	NM_001001488	Atp8b1	exonic	1954
chr18:65155256-65186384+	0	0	0	0	0	0	2	0	0	6.58545	6.58545	6.58545	6.58545	6.58545	6.58545	9.74562	6.58545	6.58545	chr18	65155255	65186384	+		novel	NM_031881	Nedd4l	exonic	1422
chr18:65172275-65186384+	0	1	0	0	1	0	0	0	0	6.58545	8.73056	6.58545	6.58545	8.98942	6.58545	6.58545	6.58545	6.58545	chr18	65172274	65186384	+	18_65346038_65331929_-14109|12.66|2|3	youxintian_mouse28026	NM_031881	Nedd4l	exonic	642
chr18:65437822-65453704+	0	0	0	0	0	0	0	0	2	6.58545	6.58545	6.58545	6.58545	6.58545	6.58545	6.58545	6.58545	9.80143	chr18	65437821	65453704	+		novel	NM_172833	Malt1	exonic	782
chr18:65622984-65625334+	1	2	0	0	0	2	3	0	0	9.11153	9.5575	6.58545	6.58545	6.58545	9.62495	10.2758	6.58545	6.58545	chr18	65622983	65625334	+	mm9_circ_013266	circBase	NM_207255	Zfp532	exonic	2351
chr18:65638750-65656632+	0	3	2	4	2	3	3	2	1	6.58545	10.0798	10.3404	10.8672	9.84625	10.1502	10.2758	9.73278	8.94889	chr18	65638749	65656632	+	mm9_circ_001096	circBase	uc008fff.2	Zfp532	exonic	804
chr18:65638750-65685690+	2	0	0	0	0	0	0	0	0	9.98053	6.58545	6.58545	6.58545	6.58545	6.58545	6.58545	6.58545	6.58545	chr18	65638749	65685690	+	mm9_circ_016387	circBase	uc008ffe.2	Zfp532	exonic	638
chr18:67306671-67310755+	0	0	0	0	0	1	3	0	0	6.58545	6.58545	6.58545	6.58545	6.58545	8.79054	10.2758	6.58545	6.58545	chr18	67306670	67310755	+		novel	NM_053261	Impa2	exonic	260
chr18:67420986-67434229-	0	2	0	0	0	0	0	0	0	6.58545	9.5575	6.58545	6.58545	6.58545	6.58545	6.58545	6.58545	6.58545	chr18	67420985	67434229	-	18_67593883_67580640_-13243|20.95|2|2	youxintian_mouse28026	NM_027130	Afg3l2	exonic	1000
chr18:67688891-67711927-	0	0	0	0	0	0	0	0	0	6.58545	6.58545	6.58545	6.58545	6.58545	6.58545	6.58545	6.58545	6.58545	chr18	67688890	67711927	-	18_67871581_67848545_-23036|19.71|2|5	youxintian_mouse28026	NM_008977	Ptpn2	exonic	291
chr18:68286876-68287176-	0	0	0	0	0	0	0	0	0	6.58545	6.58545	6.58545	6.58545	6.58545	6.58545	6.58545	6.58545	6.58545	chr18	68286875	68287176	-		novel	ENSMUST00000042852	Fam210a	intronic	301
chr18:69564034-69564684+	1	2	1	0	0	0	0	0	2	9.11153	9.5575	9.44345	6.58545	6.58545	6.58545	6.58545	6.58545	9.80143	chr18	69564033	69564684	+	mm9_circ_007569	circBase	NM_013685	Tcf4	exonic	180
chr18:69938846-69947179+	0	0	0	3	0	0	0	1	0	6.58545	6.58545	6.58545	10.4767	6.58545	6.58545	6.58545	8.88706	6.58545	chr18	69938845	69947179	+		novel	uc008fnx.1	Ccdc68	exonic	602
chr18:70024998-70025367-	0	0	0	0	0	0	0	2	0	6.58545	6.58545	6.58545	6.58545	6.58545	6.58545	6.58545	9.73278	6.58545	chr18	70024997	70025367	-		novel	ENSMUST00000069749	Rab27b	intronic	370
chr18:70580653-70593340+	4	3	0	1	3	1	1	1	0	10.9103	10.0798	6.58545	9.07415	10.3801	8.79054	8.8986	8.88706	6.58545	chr18	70580652	70593340	+		novel	NM_010773	Mbd2	exonic	298
chr18:70580653-70594399+	0	0	0	0	0	2	1	3	2	6.58545	6.58545	6.58545	6.58545	6.58545	9.62495	8.8986	10.2624	9.80143	chr18	70580652	70594399	+	18_70754053_70740307_-13746|15.31|12|15	youxintian_mouse28026	NM_010773	Mbd2	sense overlapping	13747
chr18:73657195-73658898-	0	1	0	1	2	0	0	1	0	6.58545	8.73056	6.58545	9.07415	9.84625	6.58545	6.58545	8.88706	6.58545	chr18	73657194	73658898	-	18_73818552_73816849_-1703|23.29|2|4	youxintian_mouse28026	NM_008540	Smad4	exonic	288
chr18:73657195-73662867-	1	2	0	1	0	0	2	8	1	9.11153	9.5575	6.58545	9.07415	6.58545	6.58545	9.74562	11.6052	8.94889	chr18	73657194	73662867	-	18_73822521_73816849_-5672|17.50|14|23	youxintian_mouse28026	NM_008540	Smad4	exonic	498
chr18:73657195-73678039-	0	0	0	0	3	3	0	0	1	6.58545	6.58545	6.58545	6.58545	10.3801	10.1502	6.58545	6.58545	8.94889	chr18	73657194	73678039	-	18_73837693_73816849_-20844|23.75|19|87	youxintian_mouse28026	NM_008540	Smad4	exonic	1080
chr18:73657195-73696444-	0	0	0	0	0	0	0	0	2	6.58545	6.58545	6.58545	6.58545	6.58545	6.58545	6.58545	6.58545	9.80143	chr18	73657194	73696444	-		novel	NM_008540	Smad4	sense overlapping	39250
chr18:73675161-73678039-	1	4	3	8	1	1	0	3	0	9.11153	10.4625	10.8892	11.8296	8.98942	8.79054	6.58545	10.2624	6.58545	chr18	73675160	73678039	-	mm9_circ_006973	circBase	NM_008540	Smad4	exonic	582
chr18:73794446-73796389-	0	2	0	0	0	0	0	0	0	6.58545	9.5575	6.58545	6.58545	6.58545	6.58545	6.58545	6.58545	6.58545	chr18	73794445	73796389	-		novel	NM_145494	Me2	exonic	342
chr18:74569767-74580534+	0	1	0	0	1	3	1	0	0	6.58545	8.73056	6.58545	6.58545	8.98942	10.1502	8.8986	6.58545	6.58545	chr18	74569766	74580534	+	18_74740188_74729421_-10767|20.37|10|14	youxintian_mouse28026	NM_201600	Myo5b	exonic	428
chr18:74569767-74617079+	0	0	0	0	0	0	0	0	0	6.58545	6.58545	6.58545	6.58545	6.58545	6.58545	6.58545	6.58545	6.58545	chr18	74569766	74617079	+		novel	NM_201600	Myo5b	exonic	585
chr18:74577455-74580534+	1	2	0	1	1	2	1	0	5	9.11153	9.5575	6.58545	9.07415	8.98942	9.62495	8.8986	6.58545	11.0271	chr18	74577454	74580534	+	18_74740188_74737109_-3079|16.73|15|32	youxintian_mouse28026	NM_201600	Myo5b	exonic	317
chr18:74634461-74654070+	0	0	0	0	2	0	0	0	0	6.58545	6.58545	6.58545	6.58545	9.84625	6.58545	6.58545	6.58545	6.58545	chr18	74634460	74654070	+		novel	NM_201600	Myo5b	exonic	707
chr18:74653360-74661729+	0	0	0	0	0	0	0	0	0	6.58545	6.58545	6.58545	6.58545	6.58545	6.58545	6.58545	6.58545	6.58545	chr18	74653359	74661729	+		novel	NM_201600	Myo5b	exonic	346
chr18:74653360-74662746+	2	0	0	0	0	0	0	0	0	9.98053	6.58545	6.58545	6.58545	6.58545	6.58545	6.58545	6.58545	6.58545	chr18	74653359	74662746	+	18_74822400_74813014_-9386|21.42|4|4	youxintian_mouse28026	NM_201600	Myo5b	exonic	430
chr18:74661607-74682635+	0	0	0	0	0	0	0	0	0	6.58545	6.58545	6.58545	6.58545	6.58545	6.58545	6.58545	6.58545	6.58545	chr18	74661606	74682635	+		novel	NM_201600	Myo5b	exonic	548
chr18:74722333-74734004+	0	0	0	2	0	0	0	0	0	6.58545	6.58545	6.58545	9.93954	6.58545	6.58545	6.58545	6.58545	6.58545	chr18	74722332	74734004	+		novel	NM_201600	Myo5b	exonic	634
chr18:75080203-75082507+	0	1	0	0	0	1	2	0	0	6.58545	8.73056	6.58545	6.58545	6.58545	8.79054	9.74562	6.58545	6.58545	chr18	75080202	75082507	+	mm9_circ_007450	circBase	NM_027727	Dym	exonic	269
chr18:75080203-75126919+	0	0	0	0	0	0	0	0	0	6.58545	6.58545	6.58545	6.58545	6.58545	6.58545	6.58545	6.58545	6.58545	chr18	75080202	75126919	+	18_75286573_75239857_-46716|18.17|11|15	youxintian_mouse28026	NM_027727	Dym	exonic	966
chr18:75114790-75123583+	0	3	0	0	0	0	0	0	0	6.58545	10.0798	6.58545	6.58545	6.58545	6.58545	6.58545	6.58545	6.58545	chr18	75114789	75123583	+		novel	NM_027727	Dym	exonic	488
chr18:75114790-75126919+	0	1	1	0	6	10	6	7	3	6.58545	8.73056	9.44345	6.58545	11.3272	11.7992	11.2188	11.4189	10.3337	chr18	75114789	75126919	+	mm9_circ_010219	circBase	NM_027727	Dym	exonic	697
chr18:75114790-75151238+	0	0	0	0	2	0	0	1	0	6.58545	6.58545	6.58545	6.58545	9.84625	6.58545	6.58545	8.88706	6.58545	chr18	75114789	75151238	+		novel	NM_027727	Dym	sense overlapping	36449
chr18:75123458-75126919+	0	0	0	0	0	2	0	0	0	6.58545	6.58545	6.58545	6.58545	6.58545	9.62495	6.58545	6.58545	6.58545	chr18	75123457	75126919	+		novel	NM_027727	Dym	exonic	335
chr18:75519739-75521869-	0	1	0	0	0	0	2	0	0	6.58545	8.73056	6.58545	6.58545	6.58545	6.58545	9.74562	6.58545	6.58545	chr18	75519738	75521869	-	18_75681523_75679393_-2130|17.53|14|123	youxintian_mouse28026	NM_201354	Ctif	exonic	862
chr18:76262440-76304776+	0	2	0	0	0	0	0	0	0	6.58545	9.5575	6.58545	6.58545	6.58545	6.58545	6.58545	6.58545	6.58545	chr18	76262439	76304776	+	18_76464430_76422094_-42336|13.15|13|19	youxintian_mouse28026	NM_010754	Smad2	sense overlapping	42337
chr18:76286860-76302527+	0	0	0	0	0	0	0	0	0	6.58545	6.58545	6.58545	6.58545	6.58545	6.58545	6.58545	6.58545	6.58545	chr18	76286859	76302527	+		novel	NM_010754	Smad2	exonic	1044
chr18:77097249-77105889+	0	4	0	0	0	0	0	0	1	6.58545	10.4625	6.58545	6.58545	6.58545	6.58545	6.58545	6.58545	8.94889	chr18	77097248	77105889	+	18_77344628_77335988_-8640|24.13|21|112	youxintian_mouse28026	NM_008602	Pias2	exonic	560
chr18:78856484-78859931-	0	3	1	1	2	4	0	1	0	6.58545	10.0798	9.44345	9.07415	9.84625	10.5344	6.58545	8.88706	6.58545	chr18	78856483	78859931	-	mm9_circ_003022	circBase	NM_053099	Setbp1	exonic	3448
chr18:79047752-79090830-	0	0	0	0	0	2	0	0	0	6.58545	6.58545	6.58545	6.58545	6.58545	9.62495	6.58545	6.58545	6.58545	chr18	79047751	79090830	-		novel	NM_053099	Setbp1	sense overlapping	43079
chr18:79075394-79093880-	0	2	0	0	0	0	0	0	0	6.58545	9.5575	6.58545	6.58545	6.58545	6.58545	6.58545	6.58545	6.58545	chr18	79075393	79093880	-		novel	NM_053099	Setbp1	sense overlapping	18487
chr18:79086551-79087180-	2	5	2	2	11	1	6	6	2	9.98053	10.7647	10.3404	9.93954	12.177	8.79054	11.2188	11.2049	9.80143	chr18	79086550	79087180	-	mm9_circ_012515	circBase	NM_053099	Setbp1	exonic	630
chr18:80445886-80460013-	0	1	0	0	0	0	0	0	0	6.58545	8.73056	6.58545	6.58545	6.58545	6.58545	6.58545	6.58545	6.58545	chr18	80445885	80460013	-	18_80656752_80642625_-14127|21.18|6|14	youxintian_mouse28026	NM_026295	Ctdp1	exonic	2076
chr18:80697555-80698656-	0	0	0	3	0	0	0	0	0	6.58545	6.58545	6.58545	10.4767	6.58545	6.58545	6.58545	6.58545	6.58545	chr18	80697554	80698656	-		novel	NM_016791	Nfatc1	exonic	1102
chr18:80844527-80917878-	0	0	0	0	0	0	4	0	2	6.58545	6.58545	6.58545	6.58545	6.58545	6.58545	10.6626	6.58545	9.80143	chr18	80844526	80917878	-	18_81114617_81041266_-73351|18.42|14|36	youxintian_mouse28026	NM_015805	Atp9b	exonic	911
chr18:80858544-80917878-	0	1	0	0	0	0	0	1	0	6.58545	8.73056	6.58545	6.58545	6.58545	6.58545	6.58545	8.88706	6.58545	chr18	80858543	80917878	-	mm9_circ_003024	circBase	NM_015805	Atp9b	exonic	754
chr18:80869742-80917878-	0	1	0	2	1	1	0	0	2	6.58545	8.73056	6.58545	9.93954	8.98942	8.79054	6.58545	6.58545	9.80143	chr18	80869741	80917878	-	18_81114617_81066481_-48136|16.20|18|70	youxintian_mouse28026	NM_015805	Atp9b	exonic	659
chr18:80877315-80917878-	1	0	0	0	0	1	0	0	0	9.11153	6.58545	6.58545	6.58545	6.58545	8.79054	6.58545	6.58545	6.58545	chr18	80877314	80917878	-	18_81114617_81074054_-40563|11.84|13|29	youxintian_mouse28026	NM_015805	Atp9b	exonic	607
chr18:80891815-80917878-	0	0	0	1	0	0	0	0	1	6.58545	6.58545	6.58545	9.07415	6.58545	6.58545	6.58545	6.58545	8.94889	chr18	80891814	80917878	-	18_81114617_81088554_-26063|11.42|16|30	youxintian_mouse28026	NM_015805	Atp9b	exonic	548
chr18:80905652-80917878-	0	1	0	0	0	0	0	0	0	6.58545	8.73056	6.58545	6.58545	6.58545	6.58545	6.58545	6.58545	6.58545	chr18	80905651	80917878	-	18_81114617_81102391_-12226|15.79|5|8	youxintian_mouse28026	NM_015805	Atp9b	sense overlapping	12227
chr18:80909592-80917878-	0	1	1	0	2	1	2	2	0	6.58545	8.73056	9.44345	6.58545	9.84625	8.79054	9.74562	9.73278	6.58545	chr18	80909591	80917878	-	mm9_circ_012897	circBase	NM_015805	Atp9b	exonic	439
chr18:82620318-82624486-	0	0	0	0	0	0	0	0	0	6.58545	6.58545	6.58545	6.58545	6.58545	6.58545	6.58545	6.58545	6.58545	chr18	82620317	82624486	-		novel	NM_177832	Zfp236	exonic	899
chr18:82620318-82682287-	0	0	0	0	0	0	1	1	0	6.58545	6.58545	6.58545	6.58545	6.58545	6.58545	8.8986	8.88706	6.58545	chr18	82620317	82682287	-		novel	NM_177832	Zfp236	exonic	3977
chr18:82664838-82671810-	2	0	0	0	0	0	0	0	0	9.98053	6.58545	6.58545	6.58545	6.58545	6.58545	6.58545	6.58545	6.58545	chr18	82664837	82671810	-	18_82841202_82834230_-6972|21.77|4|5	youxintian_mouse28026	uc012bfo.1	Zfp236	exonic	442
chr18:82664838-82682287-	2	2	0	0	0	2	0	1	1	9.98053	9.5575	6.58545	6.58545	6.58545	9.62495	6.58545	8.88706	8.94889	chr18	82664837	82682287	-	mm9_circ_010094	circBase	uc012bfo.1	Zfp236	exonic	929
[truncated: 2,530 more rows]
