# Supplementary material for: circRNA expression profiling of colon tissue from mesalazine-treated mouse of inflammatory bowel disease reveals an important circRNA-miRNA-mRNA pathway
Source: Aging (Albany NY). 2021 Mar 26;13(7):10187–207. doi: 10.18632/aging.202780 (PMC8064189; doi:10.18632/aging.202780)
Supplement: Supplementary Table 3 [file aging-13-202780-s004.xlsx]

## Sheet: up DSS vs Control
#Column "GO.ID" stands for the ID of gene ontology term
#Column "Term" stands for the name of gene ontology term
#Column "Ontology" stands for the ontology of GOID belongs to
#Column "Count" stands for the number of DE genes associated with the listed GOID
#Column "Pop.Hits" stands for the number of background population genes associated with the listed GOID
#Column "List.Total" stands for the total number of DE genes
#Column "Pop.Total" stands for the total number of background population genes
#Column "Fold.Enrichment" stands for the Fold Enrichment value of the GOID, it equals (Count/Pop.Hits)/(List.Total/Pop.Total)
#Column "Pvalue" stands for the significance testing value of the GOID
#Column "FDR" stands for the false discovery rate of the GOID, using Benjamini & Hochberg (1995) method
#Column "Enrichment.Score" stands for the Enrichment Score value of the GOID, it equals (-log10(Pvalue))
#Column "Gene.Ratio" stands for the Gene Ratio value genes associated with the GOID, it equals (Count/List.Total)
#Column "GENES" stands for the DE genes associated with the GOID
GO.ID	Term	Ontology	Count	Pop.Hits	List.Total	Pop.Total	Fold.Enrichment	Pvalue	FDR	Enrichment.Score	Gene.Ratio	GENES
GO:1900746	regulation of vascular endothelial growth factor signaling pathway	Biological process	2	11	37	23276	114.378	0.000134014	0.487268	3.87285	0.0540541	XDH//TCF4
GO:1902547	regulation of cellular response to vascular endothelial growth factor stimulus	Biological process	2	12	37	23276	104.847	0.000160656	0.487268	3.7941	0.0540541	TCF4//XDH
GO:0038084	vascular endothelial growth factor signaling pathway	Biological process	2	24	37	23276	52.4234	0.000663806	1	3.17796	0.0540541	TCF4//XDH
GO:0034622	cellular macromolecular complex assembly	Biological process	6	769	37	23276	4.9083	0.00123587	1	2.90803	0.162162	CNOT6L//RIMS1//BAIAP2L1//HDGFRP3//PIK3C2A//TCF4
GO:0035924	cellular response to vascular endothelial growth factor stimulus	Biological process	2	36	37	23276	34.9489	0.00149713	1	2.82474	0.0540541	TCF4//XDH
GO:0031334	positive regulation of protein complex assembly	Biological process	3	193	37	23276	9.77846	0.00354429	1	2.45047	0.0810811	RIMS1//BAIAP2L1//IDE
GO:0044089	positive regulation of cellular component biogenesis	Biological process	4	405	37	23276	6.21315	0.00378936	1	2.42143	0.108108	CNOT6L//RIMS1//BAIAP2L1//IDE
GO:0043623	cellular protein complex assembly	Biological process	4	452	37	23276	5.56709	0.00558413	1	2.25304	0.108108	RIMS1//BAIAP2L1//HDGFRP3//PIK3C2A
GO:0022607	cellular component assembly	Biological process	9	2168	37	23276	2.6115	0.00582287	1	2.23486	0.243243	BAIAP2L1//RIMS1//TTLL5//CNOT6L//IDE//HDGFRP3//PIK3C2A//TCF4//PLS1
GO:0065003	macromolecular complex assembly	Biological process	7	1427	37	23276	3.08589	0.00652145	1	2.18566	0.189189	RIMS1//CNOT6L//BAIAP2L1//IDE//HDGFRP3//PIK3C2A//TCF4
GO:0043933	macromolecular complex subunit organization	Biological process	9	2239	37	23276	2.52869	0.00717819	1	2.14398	0.243243	BAIAP2L1//RIMS1//HDGFRP3//CNOT6L//BRE//ASH1L//IDE//PIK3C2A//TCF4
GO:2000181	negative regulation of blood vessel morphogenesis	Biological process	2	84	37	23276	14.9781	0.00789677	1	2.10255	0.0540541	TCF4//XDH
GO:1901343	negative regulation of vasculature development	Biological process	2	88	37	23276	14.2973	0.00863705	1	2.06363	0.0540541	TCF4//XDH
GO:0048523	negative regulation of cellular process	Biological process	13	4140	37	23276	1.97538	0.00886215	1	2.05246	0.351351	TCF4//XDH//HDGFRP3//APBB3//ANP32B//MARF1//ASH1L//IDE//MORC3//CNOT6L//PIK3C2A//CDYL//CCAR1
GO:0044085	cellular component biogenesis	Biological process	9	2354	37	23276	2.40515	0.00988182	1	2.00516	0.243243	BAIAP2L1//RIMS1//TTLL5//CNOT6L//IDE//HDGFRP3//PIK3C2A//TCF4//PLS1
GO:0035745	T-helper 2 cell cytokine production	Biological process	1	10	37	23276	62.9081	0.015786	1	1.80173	0.027027	DENND1B
GO:0048519	negative regulation of biological process	Biological process	13	4483	37	23276	1.82424	0.0170558	1	1.76813	0.351351	TCF4//XDH//ASH1L//HDGFRP3//APBB3//ANP32B//MARF1//CNOT6L//IDE//MORC3//PIK3C2A//CDYL//CCAR1
GO:0050794	regulation of cellular process	Biological process	23	10125	37	23276	1.42902	0.0171175	1	1.76656	0.621622	TCF4//XDH//CDYL//ASH1L//APBB3//CNOT6L//CNOT4//CCAR1//HDGFRP3//AGAP1//RALGPS2//ANP32B//ACER3//BAIAP2L1//RIMS1//MARF1//PIK3C2A//DENND1B//IDE//PLS1//BRE//MORC3//ZAN
GO:0006670	sphingosine metabolic process	Biological process	1	11	37	23276	57.1892	0.0173512	1	1.76067	0.027027	ACER3
GO:0032536	regulation of cell projection size	Biological process	1	11	37	23276	57.1892	0.0173512	1	1.76067	0.027027	PLS1
GO:0035743	CD4-positive, alpha-beta T cell cytokine production	Biological process	1	11	37	23276	57.1892	0.0173512	1	1.76067	0.027027	DENND1B
GO:0043254	regulation of protein complex assembly	Biological process	3	351	37	23276	5.37676	0.0180915	1	1.74253	0.0810811	RIMS1//BAIAP2L1//IDE
GO:0032530	regulation of microvillus organization	Biological process	1	12	37	23276	52.4234	0.018914	1	1.72322	0.027027	PLS1
GO:0034311	diol metabolic process	Biological process	1	12	37	23276	52.4234	0.018914	1	1.72322	0.027027	ACER3
GO:2001212	regulation of vasculogenesis	Biological process	1	12	37	23276	52.4234	0.018914	1	1.72322	0.027027	XDH
GO:0032269	negative regulation of cellular protein metabolic process	Biological process	5	1001	37	23276	3.14226	0.0202725	1	1.69309	0.135135	XDH//MARF1//ASH1L//IDE//CNOT6L
GO:0002674	negative regulation of acute inflammatory response	Biological process	1	13	37	23276	48.3909	0.0204743	1	1.68879	0.027027	ASH1L
GO:0048268	clathrin coat assembly	Biological process	1	13	37	23276	48.3909	0.0204743	1	1.68879	0.027027	PIK3C2A
GO:1903047	mitotic cell cycle process	Biological process	4	668	37	23276	3.76695	0.0209845	1	1.6781	0.108108	ANP32B//PPM1D//BRE//STAG1
GO:0007568	aging	Biological process	2	144	37	23276	8.73724	0.0219752	1	1.65807	0.0540541	MORC3//IDE
GO:0046519	sphingoid metabolic process	Biological process	1	14	37	23276	44.9344	0.0220323	1	1.65694	0.027027	ACER3
GO:0051457	maintenance of protein location in nucleus	Biological process	1	14	37	23276	44.9344	0.0220323	1	1.65694	0.027027	MORC3
GO:0061157	mRNA destabilization	Biological process	1	14	37	23276	44.9344	0.0220323	1	1.65694	0.027027	CNOT6L
GO:0008283	cell proliferation	Biological process	7	1812	37	23276	2.43022	0.0223032	1	1.65163	0.189189	XDH//CNOT6L//ACER3//CCAR1//ANP32B//MORC3//HDGFRP3
GO:0022402	cell cycle process	Biological process	5	1037	37	23276	3.03318	0.023222	1	1.6341	0.135135	ANP32B//PPM1D//BRE//STAG1//MARF1
GO:0001956	positive regulation of neurotransmitter secretion	Biological process	1	15	37	23276	41.9387	0.0235878	1	1.62731	0.027027	RIMS1
GO:0018027	peptidyl-lysine dimethylation	Biological process	1	15	37	23276	41.9387	0.0235878	1	1.62731	0.027027	ASH1L
GO:1900745	positive regulation of p38MAPK cascade	Biological process	1	15	37	23276	41.9387	0.0235878	1	1.62731	0.027027	XDH
GO:2000251	positive regulation of actin cytoskeleton reorganization	Biological process	1	15	37	23276	41.9387	0.0235878	1	1.62731	0.027027	BAIAP2L1
GO:0006302	double-strand break repair	Biological process	2	152	37	23276	8.27738	0.0243007	1	1.61438	0.0540541	BRE//MARF1
GO:0007049	cell cycle	Biological process	6	1438	37	23276	2.62482	0.0246427	1	1.60831	0.162162	ANP32B//PPM1D//BRE//STAG1//MARF1//CCAR1
GO:0031324	negative regulation of cellular metabolic process	Biological process	8	2287	37	23276	2.20055	0.0248853	1	1.60406	0.216216	TCF4//XDH//MARF1//ASH1L//IDE//CNOT6L//CDYL//CCAR1
GO:0071577	zinc II ion transmembrane transport	Biological process	1	16	37	23276	39.3176	0.0251409	1	1.59962	0.027027	PIK3C2A
GO:0051248	negative regulation of protein metabolic process	Biological process	5	1066	37	23276	2.95066	0.0257933	1	1.58849	0.135135	XDH//MARF1//ASH1L//IDE//CNOT6L
GO:0010605	negative regulation of macromolecule metabolic process	Biological process	8	2312	37	23276	2.17675	0.0263743	1	1.57882	0.216216	TCF4//XDH//MARF1//CNOT6L//ASH1L//IDE//CDYL//CCAR1
GO:0016082	synaptic vesicle priming	Biological process	1	17	37	23276	37.0048	0.0266917	1	1.57362	0.027027	RIMS1
GO:0050779	RNA destabilization	Biological process	1	17	37	23276	37.0048	0.0266917	1	1.57362	0.027027	CNOT6L
GO:0044087	regulation of cellular component biogenesis	Biological process	4	721	37	23276	3.49005	0.0268548	1	1.57098	0.108108	CNOT6L//RIMS1//BAIAP2L1//IDE
GO:0042127	regulation of cell proliferation	Biological process	6	1474	37	23276	2.56071	0.0274269	1	1.56182	0.162162	XDH//CNOT6L//ACER3//CCAR1//ANP32B//MORC3
GO:0006996	organelle organization	Biological process	10	3262	37	23276	1.92851	0.0275573	1	1.55976	0.27027	BAIAP2L1//HDGFRP3//BRE//STAG1//MARF1//TTLL5//CNOT6L//ASH1L//PIK3C2A//PLS1
GO:0006901	vesicle coating	Biological process	1	18	37	23276	34.9489	0.02824	1	1.54914	0.027027	PIK3C2A
GO:0008340	determination of adult lifespan	Biological process	1	18	37	23276	34.9489	0.02824	1	1.54914	0.027027	IDE
GO:0009566	fertilization	Biological process	2	165	37	23276	7.62523	0.0282844	1	1.54845	0.0540541	ZAN//TTLL5
GO:0018200	peptidyl-glutamic acid modification	Biological process	1	19	37	23276	33.1095	0.0297859	1	1.52599	0.027027	TTLL5
GO:0032461	positive regulation of protein oligomerization	Biological process	1	19	37	23276	33.1095	0.0297859	1	1.52599	0.027027	IDE
GO:0033962	cytoplasmic mRNA processing body assembly	Biological process	1	19	37	23276	33.1095	0.0297859	1	1.52599	0.027027	CNOT6L
GO:0051590	positive regulation of neurotransmitter transport	Biological process	1	19	37	23276	33.1095	0.0297859	1	1.52599	0.027027	RIMS1
GO:1903859	regulation of dendrite extension	Biological process	1	19	37	23276	33.1095	0.0297859	1	1.52599	0.027027	RIMS1
GO:1903861	positive regulation of dendrite extension	Biological process	1	19	37	23276	33.1095	0.0297859	1	1.52599	0.027027	RIMS1
GO:1902589	single-organism organelle organization	Biological process	8	2387	37	23276	2.10836	0.0312221	1	1.50554	0.216216	BAIAP2L1//HDGFRP3//BRE//STAG1//MARF1//TTLL5//ASH1L//PLS1
GO:0060080	inhibitory postsynaptic potential	Biological process	1	20	37	23276	31.4541	0.0313294	1	1.50405	0.027027	RIMS1
GO:0048639	positive regulation of developmental growth	Biological process	2	175	37	23276	7.1895	0.0315153	1	1.50148	0.0540541	PLS1//RIMS1
GO:0050789	regulation of biological process	Biological process	23	10638	37	23276	1.36011	0.0325402	1	1.48758	0.621622	TCF4//XDH//ASH1L//CDYL//APBB3//CNOT6L//CNOT4//CCAR1//HDGFRP3//AGAP1//RALGPS2//ANP32B//ACER3//BAIAP2L1//MARF1//RIMS1//PIK3C2A//DENND1B//IDE//PLS1//BRE//MORC3//ZAN
GO:0006144	purine nucleobase metabolic process	Biological process	1	21	37	23276	29.9562	0.0328706	1	1.48319	0.027027	XDH
GO:2000300	regulation of synaptic vesicle exocytosis	Biological process	1	22	37	23276	28.5946	0.0344093	1	1.46332	0.027027	RIMS1
GO:0051130	positive regulation of cellular component organization	Biological process	5	1155	37	23276	2.72329	0.0348163	1	1.45822	0.135135	CNOT6L//RIMS1//BAIAP2L1//IDE//PLS1
GO:0000278	mitotic cell cycle	Biological process	4	786	37	23276	3.20143	0.0352922	1	1.45232	0.108108	ANP32B//PPM1D//BRE//STAG1
GO:0032528	microvillus organization	Biological process	1	23	37	23276	27.3514	0.0359457	1	1.44435	0.027027	PLS1
GO:0043171	peptide catabolic process	Biological process	1	23	37	23276	27.3514	0.0359457	1	1.44435	0.027027	IDE
GO:0097484	dendrite extension	Biological process	1	23	37	23276	27.3514	0.0359457	1	1.44435	0.027027	RIMS1
GO:0002369	T cell cytokine production	Biological process	1	24	37	23276	26.2117	0.0374797	1	1.4262	0.027027	DENND1B
GO:0045956	positive regulation of calcium ion-dependent exocytosis	Biological process	1	24	37	23276	26.2117	0.0374797	1	1.4262	0.027027	RIMS1
GO:0050435	beta-amyloid metabolic process	Biological process	1	25	37	23276	25.1632	0.0390113	1	1.40881	0.027027	IDE
GO:1900744	regulation of p38MAPK cascade	Biological process	1	25	37	23276	25.1632	0.0390113	1	1.40881	0.027027	XDH
GO:2000463	positive regulation of excitatory postsynaptic potential	Biological process	1	25	37	23276	25.1632	0.0390113	1	1.40881	0.027027	RIMS1
GO:0006461	protein complex assembly	Biological process	5	1202	37	23276	2.61681	0.0402939	1	1.39476	0.135135	RIMS1//BAIAP2L1//IDE//HDGFRP3//PIK3C2A
GO:0070271	protein complex biogenesis	Biological process	5	1202	37	23276	2.61681	0.0402939	1	1.39476	0.135135	RIMS1//BAIAP2L1//IDE//HDGFRP3//PIK3C2A
GO:0046854	phosphatidylinositol phosphorylation	Biological process	1	26	37	23276	24.1954	0.0405406	1	1.39211	0.027027	PIK3C2A
GO:0072595	maintenance of protein localization in organelle	Biological process	1	26	37	23276	24.1954	0.0405406	1	1.39211	0.027027	MORC3
GO:2000249	regulation of actin cytoskeleton reorganization	Biological process	1	26	37	23276	24.1954	0.0405406	1	1.39211	0.027027	BAIAP2L1
GO:0008284	positive regulation of cell proliferation	Biological process	4	825	37	23276	3.05009	0.0410236	1	1.38697	0.108108	CNOT6L//ACER3//CCAR1//ANP32B
GO:0044763	single-organism cellular process	Biological process	25	12142	37	23276	1.29526	0.0422895	1	1.37377	0.675676	STAG1//ANP32B//PPM1D//BAIAP2L1//BRE//RABEP1//CCAR1//MARF1//ACER3//RIMS1//PIK3C2A//XDH//HDGFRP3//AGAP1//RALGPS2//TTLL5//ZAN//MORC3//APBB3//IDE//DENND1B//TCF4//CNOT6L//PLS1//ASH1L
GO:0007169	transmembrane receptor protein tyrosine kinase signaling pathway	Biological process	3	492	37	23276	3.83586	0.0429184	1	1.36736	0.0810811	BAIAP2L1//TCF4//XDH
GO:0009892	negative regulation of metabolic process	Biological process	8	2546	37	23276	1.97669	0.0435091	1	1.36142	0.216216	TCF4//XDH//MARF1//CNOT6L//ASH1L//IDE//CDYL//CCAR1
GO:0030866	cortical actin cytoskeleton organization	Biological process	1	28	37	23276	22.4672	0.043592	1	1.36059	0.027027	PLS1
GO:0038066	p38MAPK cascade	Biological process	1	28	37	23276	22.4672	0.043592	1	1.36059	0.027027	XDH
GO:1900087	positive regulation of G1/S transition of mitotic cell cycle	Biological process	1	28	37	23276	22.4672	0.043592	1	1.36059	0.027027	ANP32B
GO:1902803	regulation of synaptic vesicle transport	Biological process	1	28	37	23276	22.4672	0.043592	1	1.36059	0.027027	RIMS1
GO:0048522	positive regulation of cellular process	Biological process	12	4541	37	23276	1.6624	0.0436387	1	1.36013	0.324324	XDH//CNOT6L//ACER3//CCAR1//ANP32B//RIMS1//TCF4//BAIAP2L1//IDE//BRE//ASH1L//PLS1
GO:0048518	positive regulation of biological process	Biological process	13	5088	37	23276	1.60732	0.0447617	1	1.34909	0.351351	XDH//CNOT6L//ACER3//CCAR1//ANP32B//RIMS1//TCF4//DENND1B//BAIAP2L1//IDE//PLS1//BRE//ASH1L
GO:0006829	zinc II ion transport	Biological process	1	29	37	23276	21.6925	0.0451141	1	1.34569	0.027027	PIK3C2A
GO:0007026	negative regulation of microtubule depolymerization	Biological process	1	29	37	23276	21.6925	0.0451141	1	1.34569	0.027027	HDGFRP3
GO:0051258	protein polymerization	Biological process	2	217	37	23276	5.79798	0.0465475	1	1.3321	0.0540541	BAIAP2L1//HDGFRP3
GO:0021591	ventricular system development	Biological process	1	30	37	23276	20.9694	0.0466339	1	1.3313	0.027027	ANP32B
GO:0032459	regulation of protein oligomerization	Biological process	1	30	37	23276	20.9694	0.0466339	1	1.3313	0.027027	IDE
GO:0045601	regulation of endothelial cell differentiation	Biological process	1	30	37	23276	20.9694	0.0466339	1	1.3313	0.027027	XDH
GO:0046834	lipid phosphorylation	Biological process	1	30	37	23276	20.9694	0.0466339	1	1.3313	0.027027	PIK3C2A
GO:0048147	negative regulation of fibroblast proliferation	Biological process	1	30	37	23276	20.9694	0.0466339	1	1.3313	0.027027	MORC3
GO:0031114	regulation of microtubule depolymerization	Biological process	1	31	37	23276	20.2929	0.0481514	1	1.31739	0.027027	HDGFRP3
GO:0000280	nuclear division	Biological process	3	520	37	23276	3.62931	0.0491903	1	1.30812	0.0810811	BRE//STAG1//MARF1
GO:0001937	negative regulation of endothelial cell proliferation	Biological process	1	32	37	23276	19.6588	0.0496665	1	1.30394	0.027027	XDH
GO:0007143	female meiotic division	Biological process	1	32	37	23276	19.6588	0.0496665	1	1.30394	0.027027	MARF1
GO:0007595	lactation	Biological process	1	32	37	23276	19.6588	0.0496665	1	1.30394	0.027027	XDH
GO:0042092	type 2 immune response	Biological process	1	32	37	23276	19.6588	0.0496665	1	1.30394	0.027027	DENND1B
GO:0050892	intestinal absorption	Biological process	1	32	37	23276	19.6588	0.0496665	1	1.30394	0.027027	PLS1
GO:0090004	positive regulation of establishment of protein localization to plasma membrane	Biological process	1	32	37	23276	19.6588	0.0496665	1	1.30394	0.027027	PLS1
GO:1902808	positive regulation of cell cycle G1/S phase transition	Biological process	1	32	37	23276	19.6588	0.0496665	1	1.30394	0.027027	ANP32B
GO:0030014	CCR4-NOT complex	Cellular component	2	15	37	23196	83.5892	0.00025657	0.121852	3.59079	0.0540541	CNOT6L//CNOT4
GO:0044464	cell part	Cellular component	33	14770	37	23196	1.4007	0.000480389	0.121852	3.31841	0.891892	RIMS1//IDE//MYO7B//PIK3C2A//ZAN//PCDH7//BAIAP2L1//CDHR5//RALGPS2//ANTXR2//TTLL5//PLS1//BRE//ASH1L//LPP//XDH//APBB3//CNOT6L//HDGFRP3//DENND1B//AGAP1//HSPA14//CNOT4//RABEP1//CCAR1//TCF4//TMCC1//ACER3//CDYL//STAG1//MORC3//ANP32B//MARF1
GO:0005623	cell	Cellular component	33	14784	37	23196	1.39937	0.000492664	0.121852	3.30745	0.891892	RIMS1//IDE//MYO7B//PIK3C2A//ZAN//PCDH7//BAIAP2L1//CDHR5//RALGPS2//BRE//STAG1//TCF4//XDH//HDGFRP3//AGAP1//HSPA14//TMCC1//ACER3//MARF1//CDYL//ASH1L//LPP//APBB3//CNOT6L//TTLL5//MORC3//CNOT4//ANP32B//CCAR1//PLS1//DENND1B//RABEP1//ANTXR2
GO:0043229	intracellular organelle	Cellular component	27	10996	37	23196	1.53936	0.00142344	0.181595	2.84666	0.72973	RABEP1//PIK3C2A//DENND1B//IDE//TMCC1//ACER3//BRE//CDYL//ASH1L//STAG1//LPP//TCF4//APBB3//CNOT6L//HDGFRP3//TTLL5//MORC3//CNOT4//ANP32B//HSPA14//MYO7B//BAIAP2L1//XDH//MARF1//RIMS1//PLS1//CCAR1
GO:0005777	peroxisome	Cellular component	3	141	37	23196	13.3387	0.00146842	0.181595	2.83315	0.0810811	IDE//MARF1//XDH
GO:0042579	microbody	Cellular component	3	141	37	23196	13.3387	0.00146842	0.181595	2.83315	0.0810811	IDE//MARF1//XDH
GO:0044424	intracellular part	Cellular component	29	12670	37	23196	1.43494	0.0023883	0.236227	2.62191	0.783784	PLS1//BRE//IDE//PIK3C2A//ASH1L//LPP//XDH//APBB3//CNOT6L//HDGFRP3//TTLL5//DENND1B//AGAP1//HSPA14//CNOT4//RABEP1//BAIAP2L1//CCAR1//RALGPS2//TCF4//TMCC1//ACER3//MARF1//CDYL//STAG1//MORC3//ANP32B//MYO7B//RIMS1
GO:0043226	organelle	Cellular component	28	12018	37	23196	1.46062	0.00254692	0.236227	2.59398	0.756757	TTLL5//RIMS1//PIK3C2A//DENND1B//RABEP1//IDE//TMCC1//ACER3//MARF1//XDH//BRE//CDYL//ASH1L//STAG1//LPP//TCF4//APBB3//CNOT6L//HDGFRP3//MORC3//CNOT4//ANP32B//PLS1//MYO7B//BAIAP2L1//CDHR5//HSPA14//CCAR1
GO:0005622	intracellular	Cellular component	29	12802	37	23196	1.42014	0.00294406	0.242721	2.53105	0.783784	BRE//STAG1//TCF4//IDE//XDH//HDGFRP3//AGAP1//HSPA14//BAIAP2L1//TMCC1//ACER3//MARF1//CDYL//PIK3C2A//ASH1L//LPP//APBB3//CNOT6L//TTLL5//MORC3//CNOT4//ANP32B//CCAR1//PLS1//DENND1B//RABEP1//RALGPS2//MYO7B//RIMS1
GO:0015629	actin cytoskeleton	Cellular component	4	420	37	23196	5.97066	0.00436419	0.323823	2.3601	0.108108	MYO7B//PLS1//APBB3//BAIAP2L1
GO:0005634	nucleus	Cellular component	17	6261	37	23196	1.70222	0.0102515	0.691508	1.98921	0.459459	BRE//TCF4//CCAR1//CDYL//IDE//ASH1L//STAG1//HDGFRP3//MORC3//BAIAP2L1//PIK3C2A//LPP//APBB3//CNOT6L//TTLL5//CNOT4//ANP32B
GO:0043227	membrane-bounded organelle	Cellular component	25	11071	37	23196	1.41568	0.0117841	0.728651	1.9287	0.675676	RABEP1//IDE//TMCC1//ACER3//BRE//CDYL//PIK3C2A//ASH1L//STAG1//LPP//TCF4//APBB3//CNOT6L//HDGFRP3//TTLL5//MORC3//CNOT4//ANP32B//PLS1//MYO7B//BAIAP2L1//CDHR5//XDH//MARF1//CCAR1
GO:0005903	brush border	Cellular component	2	125	37	23196	10.0307	0.0169647	0.96829	1.77046	0.0540541	PLS1//MYO7B
GO:0031597	cytosolic proteasome complex	Cellular component	1	12	37	23196	52.2432	0.0189787	1	1.72173	0.027027	IDE
GO:0005641	nuclear envelope lumen	Cellular component	1	13	37	23196	48.2245	0.0205443	1	1.68731	0.027027	CCAR1
GO:0044428	nuclear part	Cellular component	10	3224	37	23196	1.94454	0.0261636	1	1.5823	0.27027	BRE//CCAR1//CDYL//IDE//ASH1L//STAG1//HDGFRP3//MORC3//BAIAP2L1//TCF4
GO:0005942	phosphatidylinositol 3-kinase complex	Cellular component	1	18	37	23196	34.8288	0.0283361	1	1.54766	0.027027	PIK3C2A
GO:0098862	cluster of actin-based cell projections	Cellular component	2	165	37	23196	7.59902	0.0284641	1	1.5457	0.0540541	PLS1//MYO7B
GO:0005737	cytoplasm	Cellular component	22	9903	37	23196	1.39273	0.0295519	1	1.52941	0.594595	PIK3C2A//DENND1B//RABEP1//XDH//IDE//HDGFRP3//AGAP1//HSPA14//BAIAP2L1//TMCC1//ACER3//MARF1//ASH1L//PLS1//BRE//LPP//APBB3//CNOT6L//TTLL5//CNOT4//CCAR1//RALGPS2
GO:0005782	peroxisomal matrix	Cellular component	1	19	37	23196	32.9957	0.0298872	1	1.52451	0.027027	IDE
GO:0031907	microbody lumen	Cellular component	1	19	37	23196	32.9957	0.0298872	1	1.52451	0.027027	IDE
GO:0043231	intracellular membrane-bounded organelle	Cellular component	22	9959	37	23196	1.3849	0.0316337	1	1.49985	0.594595	IDE//TMCC1//ACER3//BRE//CDYL//PIK3C2A//ASH1L//STAG1//LPP//TCF4//APBB3//CNOT6L//HDGFRP3//TTLL5//MORC3//CNOT4//ANP32B//RABEP1//XDH//MARF1//CCAR1//BAIAP2L1
GO:0005829	cytosol	Cellular component	6	1559	37	23196	2.41277	0.0353322	1	1.45183	0.162162	IDE//XDH//HDGFRP3//AGAP1//HSPA14//BAIAP2L1
GO:0005654	nucleoplasm	Cellular component	7	1989	37	23196	2.20635	0.0354829	1	1.44998	0.189189	MORC3//CDYL//IDE//ASH1L//STAG1//HDGFRP3//BAIAP2L1
GO:0048786	presynaptic active zone	Cellular component	1	27	37	23196	23.2192	0.0422096	1	1.37459	0.027027	RIMS1
GO:0046872	metal ion binding	Molecular function	15	3317	37	22849	2.79262	0.000101418	0.0689408	3.99389	0.405405	PLS1//CDHR5//XDH//IDE//ASH1L//LPP//MORC3//CNOT4//RIMS1//PAPPA//CNOT6L//ZC3H12C//AGAP1//PPM1D//ANTXR2
GO:0043167	ion binding	Molecular function	19	5178	37	22849	2.26598	0.000129155	0.0689408	3.88889	0.513514	PPM1D//AGAP1//XDH//PLS1//RIMS1//IDE//PAPPA//ASH1L//LPP//CNOT6L//ZC3H12C//MORC3//CNOT4//ANTXR2//CDHR5//PIK3C2A//MYO7B//TTLL5//HSPA14
GO:0043169	cation binding	Molecular function	15	3407	37	22849	2.71885	0.00013825	0.0689408	3.85933	0.405405	PLS1//RIMS1//IDE//PAPPA//ASH1L//LPP//XDH//CNOT6L//ZC3H12C//MORC3//AGAP1//CNOT4//PPM1D//ANTXR2//CDHR5
GO:0005488	binding	Molecular function	30	12258	37	22849	1.51136	0.000480308	0.179635	3.31848	0.810811	PLS1//RIMS1//LPP//TCF4//XDH//CNOT6L//HDGFRP3//RABEP1//PCDH7//CCAR1//ZAN//IDE//CDHR5//APBB3//BAIAP2L1//AGAP1//MYO7B//PIK3C2A//MARF1//TTLL5//HSPA14//CNOT4//PPM1D//ASH1L//STAG1//MORC3//BRE//PAPPA//ZC3H12C//ANTXR2
GO:0001540	beta-amyloid binding	Molecular function	2	30	37	22849	41.1694	0.00107862	0.322723	2.96713	0.0540541	IDE//APBB3
GO:0003714	transcription corepressor activity	Molecular function	3	163	37	22849	11.3658	0.00231769	0.577878	2.63494	0.0810811	CDYL//TCF4//CCAR1
GO:0000166	nucleotide binding	Molecular function	9	2139	37	22849	2.59835	0.00601725	0.965495	2.2206	0.243243	XDH//AGAP1//IDE//MYO7B//PIK3C2A//TTLL5//HSPA14//MARF1//CNOT4
GO:1901265	nucleoside phosphate binding	Molecular function	9	2139	37	22849	2.59835	0.00601725	0.965495	2.2206	0.243243	IDE//MYO7B//PIK3C2A//MARF1//TTLL5//AGAP1//HSPA14//CNOT4//XDH
GO:0003682	chromatin binding	Molecular function	4	487	37	22849	5.0722	0.00771892	0.965495	2.11244	0.108108	ASH1L//STAG1//TCF4//HDGFRP3
GO:0043130	ubiquitin binding	Molecular function	2	94	37	22849	13.1392	0.010156	0.965495	1.99328	0.0540541	BRE//IDE
GO:0004222	metalloendopeptidase activity	Molecular function	2	103	37	22849	11.9911	0.0120946	0.965495	1.91741	0.0540541	IDE//PAPPA
GO:0046914	transition metal ion binding	Molecular function	6	1220	37	22849	3.03708	0.0128431	0.965495	1.89133	0.162162	XDH//IDE//ASH1L//LPP//MORC3//CNOT4
GO:0036094	small molecule binding	Molecular function	9	2456	37	22849	2.26297	0.0144372	0.965495	1.84052	0.243243	IDE//MYO7B//PIK3C2A//MARF1//TTLL5//AGAP1//HSPA14//CNOT4//XDH
GO:0032182	ubiquitin-like protein binding	Molecular function	2	115	37	22849	10.7398	0.0149103	0.965495	1.82651	0.0540541	IDE//BRE
GO:0016303	1-phosphatidylinositol-3-kinase activity	Molecular function	1	11	37	22849	56.14	0.0176729	0.965495	1.75269	0.027027	PIK3C2A
GO:0003824	catalytic activity	Molecular function	15	5456	37	22849	1.69778	0.0181384	0.965495	1.7414	0.405405	XDH//CDYL//PIK3C2A//ASH1L//IDE//PAPPA//CNOT6L//ZC3H12C//PPM1D//ACER3//TTLL5//CNOT4//AGAP1//MYO7B//CWF19L2
GO:0004535	poly(A)-specific ribonuclease activity	Molecular function	1	12	37	22849	51.4617	0.0192644	0.965495	1.71524	0.027027	CNOT6L
GO:0008270	zinc ion binding	Molecular function	5	982	37	22849	3.1443	0.02022	0.965495	1.69422	0.135135	IDE//ASH1L//LPP//MORC3//CNOT4
GO:0003779	actin binding	Molecular function	3	374	37	22849	4.95353	0.0224128	0.965495	1.6495	0.0810811	PLS1//MYO7B//BAIAP2L1
GO:0008083	growth factor activity	Molecular function	2	143	37	22849	8.63693	0.0224511	0.965495	1.64876	0.0540541	HDGFRP3//RABEP1
GO:0016725	oxidoreductase activity, acting on CH or CH2 groups	Molecular function	1	15	37	22849	41.1694	0.0240238	0.965495	1.61936	0.027027	XDH
GO:0008418	protein-N-terminal asparagine amidohydrolase activity	Molecular function	1	16	37	22849	38.5963	0.0256052	0.965495	1.59167	0.027027	ACER3
GO:0008759	UDP-3-O-[3-hydroxymyristoyl] N-acetylglucosamine deacetylase activity	Molecular function	1	16	37	22849	38.5963	0.0256052	0.965495	1.59167	0.027027	ACER3
GO:0018748	iprodione amidohydrolase activity	Molecular function	1	16	37	22849	38.5963	0.0256052	0.965495	1.59167	0.027027	ACER3
GO:0018749	(3,5-dichlorophenylurea)acetate amidohydrolase activity	Molecular function	1	16	37	22849	38.5963	0.0256052	0.965495	1.59167	0.027027	ACER3
GO:0034571	4'-(2-hydroxyisopropyl)phenylurea amidohydrolase activity	Molecular function	1	16	37	22849	38.5963	0.0256052	0.965495	1.59167	0.027027	ACER3
GO:0034573	didemethylisoproturon amidohydrolase activity	Molecular function	1	16	37	22849	38.5963	0.0256052	0.965495	1.59167	0.027027	ACER3
GO:0034576	N-isopropylacetanilide amidohydrolase activity	Molecular function	1	16	37	22849	38.5963	0.0256052	0.965495	1.59167	0.027027	ACER3
GO:0034781	N-cyclohexylformamide amidohydrolase activity	Molecular function	1	16	37	22849	38.5963	0.0256052	0.965495	1.59167	0.027027	ACER3
GO:0034876	isonicotinic acid hydrazide hydrolase activity	Molecular function	1	16	37	22849	38.5963	0.0256052	0.965495	1.59167	0.027027	ACER3
GO:0034882	cis-aconitamide amidase activity	Molecular function	1	16	37	22849	38.5963	0.0256052	0.965495	1.59167	0.027027	ACER3
GO:0034885	gamma-N-formylaminovinylacetate hydrolase activity	Molecular function	1	16	37	22849	38.5963	0.0256052	0.965495	1.59167	0.027027	ACER3
GO:0043747	N2-acetyl-L-lysine deacetylase activity	Molecular function	1	16	37	22849	38.5963	0.0256052	0.965495	1.59167	0.027027	ACER3
GO:0043748	O-succinylbenzoate synthase activity	Molecular function	1	16	37	22849	38.5963	0.0256052	0.965495	1.59167	0.027027	ACER3
GO:0043864	indoleacetamide hydrolase activity	Molecular function	1	16	37	22849	38.5963	0.0256052	0.965495	1.59167	0.027027	ACER3
GO:0043909	N-acetylcitrulline deacetylase activity	Molecular function	1	16	37	22849	38.5963	0.0256052	0.965495	1.59167	0.027027	ACER3
GO:0047419	N-acetylgalactosamine-6-phosphate deacetylase activity	Molecular function	1	16	37	22849	38.5963	0.0256052	0.965495	1.59167	0.027027	ACER3
GO:0052773	diacetylchitobiose deacetylase activity	Molecular function	1	16	37	22849	38.5963	0.0256052	0.965495	1.59167	0.027027	ACER3
GO:0052790	chitooligosaccharide deacetylase activity	Molecular function	1	16	37	22849	38.5963	0.0256052	0.965495	1.59167	0.027027	ACER3
GO:1901363	heterocyclic compound binding	Molecular function	14	5154	37	22849	1.67745	0.0258154	0.965495	1.58812	0.378378	MARF1//CNOT4//XDH//ASH1L//TCF4//MORC3//IDE//MYO7B//PIK3C2A//TTLL5//AGAP1//HSPA14//RIMS1//CCAR1
GO:0042800	histone methyltransferase activity (H3-K4 specific)	Molecular function	1	17	37	22849	36.3259	0.0271842	0.991892	1.56568	0.027027	ASH1L
GO:0003712	transcription cofactor activity	Molecular function	3	408	37	22849	4.54074	0.0280512	0.999157	1.55205	0.0810811	CCAR1//CDYL//TCF4
GO:0097159	organic cyclic compound binding	Molecular function	14	5234	37	22849	1.65181	0.0292481	1	1.5339	0.378378	MARF1//CNOT4//XDH//ASH1L//TCF4//MORC3//IDE//MYO7B//PIK3C2A//TTLL5//AGAP1//HSPA14//RIMS1//CCAR1
GO:0035004	phosphatidylinositol 3-kinase activity	Molecular function	1	19	37	22849	32.5021	0.0303347	1	1.51806	0.027027	PIK3C2A
GO:0070064	proline-rich region binding	Molecular function	1	19	37	22849	32.5021	0.0303347	1	1.51806	0.027027	BAIAP2L1
GO:0016788	hydrolase activity, acting on ester bonds	Molecular function	4	741	37	22849	3.33355	0.0310736	1	1.50761	0.108108	CNOT6L//ZC3H12C//ACER3//PPM1D
GO:0008237	metallopeptidase activity	Molecular function	2	175	37	22849	7.05761	0.0326001	1	1.48678	0.0540541	IDE//PAPPA
GO:0042803	protein homodimerization activity	Molecular function	4	765	37	22849	3.22897	0.0343555	1	1.464	0.108108	IDE//TCF4//XDH//RABEP1
GO:0016787	hydrolase activity	Molecular function	8	2390	37	22849	2.06708	0.0346087	1	1.46081	0.216216	IDE//PAPPA//CNOT6L//ZC3H12C//ACER3//PPM1D//AGAP1//MYO7B
GO:0005085	guanyl-nucleotide exchange factor activity	Molecular function	2	181	37	22849	6.82365	0.034671	1	1.46003	0.0540541	DENND1B//RALGPS2
GO:0016307	phosphatidylinositol phosphate kinase activity	Molecular function	1	22	37	22849	28.07	0.0350418	1	1.45541	0.027027	PIK3C2A
GO:0052742	phosphatidylinositol kinase activity	Molecular function	1	22	37	22849	28.07	0.0350418	1	1.45541	0.027027	PIK3C2A
GO:0000989	transcription factor activity, transcription factor binding	Molecular function	3	457	37	22849	4.05388	0.0373909	1	1.42723	0.0810811	CCAR1//CDYL//TCF4
GO:0000175	3'-5'-exoribonuclease activity	Molecular function	1	24	37	22849	25.7309	0.0381675	1	1.41831	0.027027	CNOT6L
GO:0016896	exoribonuclease activity, producing 5'-phosphomonoesters	Molecular function	1	24	37	22849	25.7309	0.0381675	1	1.41831	0.027027	CNOT6L
GO:0000988	transcription factor activity, protein binding	Molecular function	3	461	37	22849	4.0187	0.0382161	1	1.41775	0.0810811	CCAR1//CDYL//TCF4
GO:0008092	cytoskeletal protein binding	Molecular function	4	799	37	22849	3.09157	0.0393431	1	1.40513	0.108108	PLS1//MYO7B//BAIAP2L1//HDGFRP3
GO:0004532	exoribonuclease activity	Molecular function	1	25	37	22849	24.7016	0.0397267	1	1.40092	0.027027	CNOT6L
GO:0051537	2 iron, 2 sulfur cluster binding	Molecular function	1	26	37	22849	23.7516	0.0412834	1	1.38423	0.027027	XDH
GO:0004518	nuclease activity	Molecular function	2	204	37	22849	6.05432	0.0430652	1	1.36587	0.0540541	ZC3H12C//CNOT6L
GO:0001098	basal transcription machinery binding	Molecular function	1	28	37	22849	22.055	0.0443894	1	1.35272	0.027027	TCF4
GO:0001099	basal RNA polymerase II transcription machinery binding	Molecular function	1	28	37	22849	22.055	0.0443894	1	1.35272	0.027027	TCF4
GO:0051019	mitogen-activated protein kinase binding	Molecular function	1	28	37	22849	22.055	0.0443894	1	1.35272	0.027027	PPM1D
GO:0017112	Rab guanyl-nucleotide exchange factor activity	Molecular function	1	29	37	22849	21.2945	0.0459387	1	1.33782	0.027027	DENND1B
GO:0042165	neurotransmitter binding	Molecular function	1	29	37	22849	21.2945	0.0459387	1	1.33782	0.027027	IDE
GO:0043425	bHLH transcription factor binding	Molecular function	1	30	37	22849	20.5847	0.0474856	1	1.32344	0.027027	TCF4
GO:0035639	purine ribonucleoside triphosphate binding	Molecular function	6	1662	37	22849	2.22939	0.0489712	1	1.31006	0.162162	IDE//MYO7B//PIK3C2A//TTLL5//HSPA14//AGAP1

## Sheet: down DSS vs Control
#Column "GO.ID" stands for the ID of gene ontology term
#Column "Term" stands for the name of gene ontology term
#Column "Ontology" stands for the ontology of GOID belongs to
#Column "Count" stands for the number of DE genes associated with the listed GOID
#Column "Pop.Hits" stands for the number of background population genes associated with the listed GOID
#Column "List.Total" stands for the total number of DE genes
#Column "Pop.Total" stands for the total number of background population genes
#Column "Fold.Enrichment" stands for the Fold Enrichment value of the GOID, it equals (Count/Pop.Hits)/(List.Total/Pop.Total)
#Column "Pvalue" stands for the significance testing value of the GOID
#Column "FDR" stands for the false discovery rate of the GOID, using Benjamini & Hochberg (1995) method
#Column "Enrichment.Score" stands for the Enrichment Score value of the GOID, it equals (-log10(Pvalue))
#Column "Gene.Ratio" stands for the Gene Ratio value genes associated with the GOID, it equals (Count/List.Total)
#Column "GENES" stands for the DE genes associated with the GOID
GO.ID	Term	Ontology	Count	Pop.Hits	List.Total	Pop.Total	Fold.Enrichment	Pvalue	FDR	Enrichment.Score	Gene.Ratio	GENES
GO:0046916	cellular transition metal ion homeostasis	Biological process	3	70	36	23276	27.7095	0.000173206	1	3.76144	0.0833333	APP//SMAD4//AP3D1
GO:0055076	transition metal ion homeostasis	Biological process	3	105	36	23276	18.473	0.000571536	1	3.24296	0.0833333	APP//SMAD4//AP3D1
GO:0030705	cytoskeleton-dependent intracellular transport	Biological process	3	119	36	23276	16.2997	0.000822538	1	3.08484	0.0833333	APP//AP3D1//SYNE2
GO:0031062	positive regulation of histone methylation	Biological process	2	32	36	23276	40.4097	0.00112041	1	2.95062	0.0555556	SMAD4//EED
GO:0016568	chromatin modification	Biological process	5	547	36	23276	5.91001	0.00145306	1	2.83772	0.138889	SATB2//EED//USP34//KANSL1//SMAD4
GO:0008088	axo-dendritic transport	Biological process	2	37	36	23276	34.9489	0.00149713	1	2.82474	0.0555556	AP3D1//APP
GO:0048518	positive regulation of biological process	Biological process	16	5088	36	23276	2.03319	0.00207198	1	2.68361	0.444444	UTRN//SMAD4//TNS3//APP//DENND1B//SYNE2//RASA2//PGAM5//ANO1//ACSL3//CAMTA1//SATB2//AP3D1//PARM1//EED//USP34
GO:0007528	neuromuscular junction development	Biological process	2	45	36	23276	28.7358	0.00220824	1	2.65595	0.0555556	APP//UTRN
GO:0016570	histone modification	Biological process	4	386	36	23276	6.70006	0.00288429	1	2.53996	0.111111	EED//USP34//KANSL1//SMAD4
GO:0016569	covalent chromatin modification	Biological process	4	396	36	23276	6.53086	0.00316145	1	2.50011	0.111111	EED//USP34//KANSL1//SMAD4
GO:0006325	chromatin organization	Biological process	5	677	36	23276	4.77515	0.00366481	1	2.43595	0.138889	SATB2//EED//KANSL1//USP34//SMAD4
GO:0009880	embryonic pattern specification	Biological process	2	60	36	23276	21.5519	0.00389104	1	2.40993	0.0555556	SMAD4//SATB2
GO:0031060	regulation of histone methylation	Biological process	2	62	36	23276	20.8566	0.00414898	1	2.38206	0.0555556	SMAD4//EED
GO:0050885	neuromuscular process controlling balance	Biological process	2	64	36	23276	20.2049	0.00441468	1	2.3551	0.0555556	CAMTA1//APP
GO:0030163	protein catabolic process	Biological process	5	751	36	23276	4.30463	0.00567834	1	2.24578	0.138889	USP34//OMA1//SMAD4//PPP2R5C//UBAC2
GO:0010256	endomembrane system organization	Biological process	4	471	36	23276	5.49092	0.0058426	1	2.23339	0.111111	SYNE2//DYM//ACSL3//AP3D1
GO:0043933	macromolecular complex subunit organization	Biological process	9	2239	36	23276	2.59893	0.00592813	1	2.22708	0.25	SATB2//LUC7L//SMAD4//EED//KANSL1//USP34//ACSL3//APP//ACACA
GO:0048663	neuron fate commitment	Biological process	2	78	36	23276	16.5783	0.00648749	1	2.18792	0.0555556	SATB2//SMAD4
GO:0031058	positive regulation of histone modification	Biological process	2	80	36	23276	16.1639	0.00681346	1	2.16663	0.0555556	SMAD4//EED
GO:0043547	positive regulation of GTPase activity	Biological process	3	260	36	23276	7.46026	0.00749468	1	2.12525	0.0833333	RASA2//DENND1B//PGAM5
GO:0051345	positive regulation of hydrolase activity	Biological process	4	509	36	23276	5.08099	0.00765194	1	2.11623	0.111111	APP//RASA2//DENND1B//PGAM5
GO:1903310	positive regulation of chromatin modification	Biological process	2	85	36	23276	15.2131	0.00766035	1	2.11575	0.0555556	SMAD4//EED
GO:0051656	establishment of organelle localization	Biological process	3	269	36	23276	7.21066	0.00822514	1	2.08486	0.0833333	SYNE2//MYO5C//AP3D1
GO:0060021	palate development	Biological process	2	90	36	23276	14.3679	0.00855231	1	2.06792	0.0555556	SMAD4//SATB2
GO:0009987	cellular process	Biological process	30	14885	36	23276	1.3031	0.00931764	1	2.03069	0.833333	EED//SMAD4//SATB2//CDK13//ACSL3//UTRN//APP//USP34//RASA2//PPP2R5C//ARHGAP12//PGAM5//KCMF1//ACACA//PMS1//CAMTA1//RCOR3//LUC7L//OMA1//SYNE2//DYM//ANO1//AP3D1//TNS3//KANSL1//DENND1B//MSRB3//PARM1//MAGI1//UBAC2
GO:0044236	multicellular organism metabolic process	Biological process	2	95	36	23276	13.6117	0.00948864	1	2.0228	0.0555556	OMA1//ACACA
GO:0034968	histone lysine methylation	Biological process	2	96	36	23276	13.4699	0.00968117	1	2.01407	0.0555556	SMAD4//EED
GO:0044699	single-organism process	Biological process	28	13487	36	23276	1.3423	0.0105235	1	1.97784	0.777778	SMAD4//ACSL3//PITPNB//SATB2//ACACA//ARHGAP12//OMA1//APP//USP34//RASA2//PPP2R5C//PGAM5//MSRB3//PMS1//ANO1//AP3D1//SYNE2//UTRN//TNS3//EED//DENND1B//CDK13//LRIG1//KANSL1//LUC7L//DYM//MAGI1//UBAC2
GO:0010970	establishment of localization by movement along microtubule	Biological process	2	101	36	23276	12.8031	0.0106698	1	1.97184	0.0555556	APP//AP3D1
GO:0018205	peptidyl-lysine modification	Biological process	3	301	36	23276	6.44408	0.0111554	1	1.95251	0.0833333	KANSL1//SMAD4//EED
GO:0018022	peptidyl-lysine methylation	Biological process	2	104	36	23276	12.4338	0.0112836	1	1.94755	0.0555556	SMAD4//EED
GO:0043087	regulation of GTPase activity	Biological process	3	312	36	23276	6.21688	0.0122852	1	1.91062	0.0833333	RASA2//DENND1B//PGAM5
GO:0048856	anatomical structure development	Biological process	14	4984	36	23276	1.81617	0.0128862	1	1.88988	0.388889	SMAD4//PITPNB//SATB2//ARHGAP12//APP//UTRN//OMA1//CDK13//LRIG1//LUC7L//TNS3//AP3D1//DYM//ANO1
GO:0050905	neuromuscular process	Biological process	2	118	36	23276	10.9586	0.0143476	1	1.84322	0.0555556	CAMTA1//APP
GO:0042177	negative regulation of protein catabolic process	Biological process	2	120	36	23276	10.7759	0.0148117	1	1.8294	0.0555556	UBAC2//SMAD4
GO:0048522	positive regulation of cellular process	Biological process	13	4541	36	23276	1.85096	0.0148483	1	1.82832	0.361111	UTRN//SMAD4//TNS3//APP//SYNE2//ANO1//ACSL3//CAMTA1//SATB2//AP3D1//PARM1//EED//USP34
GO:0055082	cellular chemical homeostasis	Biological process	4	624	36	23276	4.14459	0.0152786	1	1.81592	0.111111	APP//SMAD4//ANO1//AP3D1
GO:0016322	neuron remodeling	Biological process	1	10	36	23276	64.6556	0.0153623	1	1.81354	0.0277778	APP
GO:0032119	sequestering of zinc ion	Biological process	1	10	36	23276	64.6556	0.0153623	1	1.81354	0.0277778	AP3D1
GO:0035646	endosome to melanosome transport	Biological process	1	10	36	23276	64.6556	0.0153623	1	1.81354	0.0277778	AP3D1
GO:0035745	T-helper 2 cell cytokine production	Biological process	1	10	36	23276	64.6556	0.0153623	1	1.81354	0.0277778	DENND1B
GO:0043485	endosome to pigment granule transport	Biological process	1	10	36	23276	64.6556	0.0153623	1	1.81354	0.0277778	AP3D1
GO:0046884	follicle-stimulating hormone secretion	Biological process	1	10	36	23276	64.6556	0.0153623	1	1.81354	0.0277778	SMAD4
GO:0048757	pigment granule maturation	Biological process	1	10	36	23276	64.6556	0.0153623	1	1.81354	0.0277778	AP3D1
GO:0061085	regulation of histone H3-K27 methylation	Biological process	1	10	36	23276	64.6556	0.0153623	1	1.81354	0.0277778	EED
GO:0061088	regulation of sequestering of zinc ion	Biological process	1	10	36	23276	64.6556	0.0153623	1	1.81354	0.0277778	AP3D1
GO:0016571	histone methylation	Biological process	2	123	36	23276	10.5131	0.0155197	1	1.80912	0.0555556	SMAD4//EED
GO:0009057	macromolecule catabolic process	Biological process	5	963	36	23276	3.35699	0.0156014	1	1.80684	0.138889	USP34//OMA1//SMAD4//PPP2R5C//UBAC2
GO:0048878	chemical homeostasis	Biological process	5	964	36	23276	3.3535	0.0156654	1	1.80506	0.138889	APP//SMAD4//ANO1//ACACA//AP3D1
GO:0048513	animal organ development	Biological process	10	3094	36	23276	2.08971	0.016254	1	1.78904	0.277778	SMAD4//SATB2//CDK13//APP//LRIG1//LUC7L//TNS3//AP3D1//DYM//ANO1
GO:0051276	chromosome organization	Biological process	5	977	36	23276	3.30888	0.0165128	1	1.78218	0.138889	SATB2//EED//KANSL1//USP34//SMAD4
GO:0051649	establishment of localization in cell	Biological process	8	2190	36	23276	2.36185	0.016767	1	1.77555	0.222222	AP3D1//SYNE2//APP//SMAD4//MYO5C//ANO1//ACSL3//UBAC2
GO:0001878	response to yeast	Biological process	1	11	36	23276	58.7778	0.0168859	1	1.77248	0.0277778	APP
GO:0003198	epithelial to mesenchymal transition involved in endocardial cushion formation	Biological process	1	11	36	23276	58.7778	0.0168859	1	1.77248	0.0277778	SMAD4
GO:0007097	nuclear migration	Biological process	1	11	36	23276	58.7778	0.0168859	1	1.77248	0.0277778	SYNE2
GO:0035743	CD4-positive, alpha-beta T cell cytokine production	Biological process	1	11	36	23276	58.7778	0.0168859	1	1.77248	0.0277778	DENND1B
GO:0043482	cellular pigment accumulation	Biological process	1	11	36	23276	58.7778	0.0168859	1	1.77248	0.0277778	AP3D1
GO:0048733	sebaceous gland development	Biological process	1	11	36	23276	58.7778	0.0168859	1	1.77248	0.0277778	SMAD4
GO:0070102	interleukin-6-mediated signaling pathway	Biological process	1	11	36	23276	58.7778	0.0168859	1	1.77248	0.0277778	SMAD4
GO:0071380	cellular response to prostaglandin E stimulus	Biological process	1	11	36	23276	58.7778	0.0168859	1	1.77248	0.0277778	ACACA
GO:0072075	metanephric mesenchyme development	Biological process	1	11	36	23276	58.7778	0.0168859	1	1.77248	0.0277778	SMAD4
GO:2000615	regulation of histone H3-K9 acetylation	Biological process	1	11	36	23276	58.7778	0.0168859	1	1.77248	0.0277778	SMAD4
GO:0065007	biological regulation	Biological process	24	11102	36	23276	1.39771	0.0169291	1	1.77137	0.666667	EED//SMAD4//SATB2//ACACA//UTRN//USP34//RASA2//PPP2R5C//ARHGAP12//PGAM5//CAMTA1//RCOR3//APP//ANO1//TNS3//OMA1//DENND1B//SYNE2//ACSL3//LUC7L//AP3D1//PARM1//CDK13//UBAC2
GO:0044707	single-multicellular organism process	Biological process	15	5687	36	23276	1.70535	0.0169644	1	1.77046	0.416667	SMAD4//PITPNB//SATB2//ACACA//OMA1//ANO1//APP//CDK13//LRIG1//ACSL3//DENND1B//LUC7L//TNS3//AP3D1//DYM
GO:1902582	single-organism intracellular transport	Biological process	6	1362	36	23276	2.84826	0.0170856	1	1.76737	0.166667	APP//AP3D1//SYNE2//ACSL3//SMAD4//UBAC2
GO:0033157	regulation of intracellular protein transport	Biological process	3	355	36	23276	5.46385	0.0173185	1	1.76149	0.0833333	ACSL3//SMAD4//UBAC2
GO:0031056	regulation of histone modification	Biological process	2	132	36	23276	9.7963	0.0177297	1	1.7513	0.0555556	SMAD4//EED
GO:0006633	fatty acid biosynthetic process	Biological process	2	133	36	23276	9.72264	0.017983	1	1.74514	0.0555556	ACACA//ACSL3
GO:0009893	positive regulation of metabolic process	Biological process	10	3148	36	23276	2.05386	0.0182054	1	1.7398	0.277778	SMAD4//APP//RASA2//DENND1B//PGAM5//CAMTA1//SATB2//PARM1//EED//ACSL3
GO:0002024	diet induced thermogenesis	Biological process	1	12	36	23276	53.8796	0.0184071	1	1.73501	0.0277778	OMA1
GO:0003157	endocardium development	Biological process	1	12	36	23276	53.8796	0.0184071	1	1.73501	0.0277778	SMAD4
GO:0032275	luteinizing hormone secretion	Biological process	1	12	36	23276	53.8796	0.0184071	1	1.73501	0.0277778	SMAD4
GO:0043476	pigment accumulation	Biological process	1	12	36	23276	53.8796	0.0184071	1	1.73501	0.0277778	AP3D1
GO:0043970	histone H3-K9 acetylation	Biological process	1	12	36	23276	53.8796	0.0184071	1	1.73501	0.0277778	SMAD4
GO:0060391	positive regulation of SMAD protein import into nucleus	Biological process	1	12	36	23276	53.8796	0.0184071	1	1.73501	0.0277778	SMAD4
GO:1904152	regulation of retrograde protein transport, ER to cytosol	Biological process	1	12	36	23276	53.8796	0.0184071	1	1.73501	0.0277778	UBAC2
GO:1904293	negative regulation of ERAD pathway	Biological process	1	12	36	23276	53.8796	0.0184071	1	1.73501	0.0277778	UBAC2
GO:1990845	adaptive thermogenesis	Biological process	1	12	36	23276	53.8796	0.0184071	1	1.73501	0.0277778	OMA1
GO:0043085	positive regulation of catalytic activity	Biological process	5	1018	36	23276	3.17562	0.0193868	1	1.71249	0.138889	APP//RASA2//DENND1B//PGAM5//PARM1
GO:0016573	histone acetylation	Biological process	2	139	36	23276	9.30296	0.0195354	1	1.70918	0.0555556	KANSL1//SMAD4
GO:0044802	single-organism membrane organization	Biological process	4	674	36	23276	3.83712	0.0197079	1	1.70536	0.111111	SYNE2//OMA1//ACSL3//AP3D1
GO:0032276	regulation of gonadotropin secretion	Biological process	1	13	36	23276	49.735	0.0199261	1	1.70058	0.0277778	SMAD4
GO:0032525	somite rostral/caudal axis specification	Biological process	1	13	36	23276	49.735	0.0199261	1	1.70058	0.0277778	SMAD4
GO:0042407	cristae formation	Biological process	1	13	36	23276	49.735	0.0199261	1	1.70058	0.0277778	OMA1
GO:0050961	detection of temperature stimulus involved in sensory perception	Biological process	1	13	36	23276	49.735	0.0199261	1	1.70058	0.0277778	ANO1
GO:0050965	detection of temperature stimulus involved in sensory perception of pain	Biological process	1	13	36	23276	49.735	0.0199261	1	1.70058	0.0277778	ANO1
GO:0070816	phosphorylation of RNA polymerase II C-terminal domain	Biological process	1	13	36	23276	49.735	0.0199261	1	1.70058	0.0277778	CDK13
GO:0071071	regulation of phospholipid biosynthetic process	Biological process	1	13	36	23276	49.735	0.0199261	1	1.70058	0.0277778	ACSL3
GO:0046887	positive regulation of hormone secretion	Biological process	2	142	36	23276	9.10642	0.0203322	1	1.69182	0.0555556	SMAD4//ANO1
GO:0018393	internal peptidyl-lysine acetylation	Biological process	2	144	36	23276	8.97994	0.0208708	1	1.68046	0.0555556	KANSL1//SMAD4
GO:0051640	organelle localization	Biological process	3	383	36	23276	5.0644	0.0211325	1	1.67505	0.0833333	SYNE2//MYO5C//AP3D1
GO:1903308	regulation of chromatin modification	Biological process	2	145	36	23276	8.91801	0.0211424	1	1.67485	0.0555556	SMAD4//EED
GO:2001252	positive regulation of chromosome organization	Biological process	2	145	36	23276	8.91801	0.0211424	1	1.67485	0.0555556	SMAD4//EED
GO:0006878	cellular copper ion homeostasis	Biological process	1	14	36	23276	46.1825	0.0214428	1	1.66872	0.0277778	APP
GO:0007183	SMAD protein complex assembly	Biological process	1	14	36	23276	46.1825	0.0214428	1	1.66872	0.0277778	SMAD4
GO:0021877	forebrain neuron fate commitment	Biological process	1	14	36	23276	46.1825	0.0214428	1	1.66872	0.0277778	SATB2
GO:0033240	positive regulation of cellular amine metabolic process	Biological process	1	14	36	23276	46.1825	0.0214428	1	1.66872	0.0277778	ACSL3
GO:0071379	cellular response to prostaglandin stimulus	Biological process	1	14	36	23276	46.1825	0.0214428	1	1.66872	0.0277778	ACACA
GO:0050789	regulation of biological process	Biological process	23	10638	36	23276	1.39789	0.0214741	1	1.66809	0.638889	EED//SMAD4//SATB2//UTRN//USP34//RASA2//PPP2R5C//ARHGAP12//PGAM5//CAMTA1//RCOR3//APP//ANO1//TNS3//OMA1//DENND1B//SYNE2//ACSL3//LUC7L//AP3D1//PARM1//CDK13//UBAC2
GO:0006475	internal protein amino acid acetylation	Biological process	2	150	36	23276	8.62074	0.0225223	1	1.64739	0.0555556	KANSL1//SMAD4
GO:0051650	establishment of vesicle localization	Biological process	2	150	36	23276	8.62074	0.0225223	1	1.64739	0.0555556	MYO5C//AP3D1
GO:0018394	peptidyl-lysine acetylation	Biological process	2	151	36	23276	8.56365	0.0228027	1	1.64201	0.0555556	KANSL1//SMAD4
GO:0002475	antigen processing and presentation via MHC class Ib	Biological process	1	15	36	23276	43.1037	0.0229572	1	1.63908	0.0277778	AP3D1
GO:0003188	heart valve formation	Biological process	1	15	36	23276	43.1037	0.0229572	1	1.63908	0.0277778	SMAD4
GO:0003272	endocardial cushion formation	Biological process	1	15	36	23276	43.1037	0.0229572	1	1.63908	0.0277778	SMAD4
GO:0043981	histone H4-K5 acetylation	Biological process	1	15	36	23276	43.1037	0.0229572	1	1.63908	0.0277778	KANSL1
GO:0043982	histone H4-K8 acetylation	Biological process	1	15	36	23276	43.1037	0.0229572	1	1.63908	0.0277778	KANSL1
GO:0051571	positive regulation of histone H3-K4 methylation	Biological process	1	15	36	23276	43.1037	0.0229572	1	1.63908	0.0277778	SMAD4
GO:0055070	copper ion homeostasis	Biological process	1	15	36	23276	43.1037	0.0229572	1	1.63908	0.0277778	APP
GO:0072074	kidney mesenchyme development	Biological process	1	15	36	23276	43.1037	0.0229572	1	1.63908	0.0277778	SMAD4
GO:1902275	regulation of chromatin organization	Biological process	2	152	36	23276	8.50731	0.0230846	1	1.63668	0.0555556	SMAD4//EED
GO:0016043	cellular component organization	Biological process	14	5340	36	23276	1.69509	0.0231818	1	1.63485	0.388889	SMAD4//SATB2//LUC7L//SYNE2//OMA1//DYM//APP//UTRN//EED//KANSL1//USP34//ACSL3//AP3D1//ACACA
GO:0006397	mRNA processing	Biological process	3	398	36	23276	4.87353	0.0233514	1	1.63169	0.0833333	CDK13//LUC7L//APP
GO:0006479	protein methylation	Biological process	2	155	36	23276	8.34265	0.0239388	1	1.6209	0.0555556	EED//SMAD4
GO:0008213	protein alkylation	Biological process	2	155	36	23276	8.34265	0.0239388	1	1.6209	0.0555556	EED//SMAD4
GO:0006656	phosphatidylcholine biosynthetic process	Biological process	1	16	36	23276	40.4097	0.0244693	1	1.61138	0.0277778	ACSL3
GO:0010971	positive regulation of G2/M transition of mitotic cell cycle	Biological process	1	16	36	23276	40.4097	0.0244693	1	1.61138	0.0277778	APP
GO:0034695	response to prostaglandin E	Biological process	1	16	36	23276	40.4097	0.0244693	1	1.61138	0.0277778	ACACA
GO:0040023	establishment of nucleus localization	Biological process	1	16	36	23276	40.4097	0.0244693	1	1.61138	0.0277778	SYNE2
GO:0048490	anterograde synaptic vesicle transport	Biological process	1	16	36	23276	40.4097	0.0244693	1	1.61138	0.0277778	AP3D1
GO:0060390	regulation of SMAD protein import into nucleus	Biological process	1	16	36	23276	40.4097	0.0244693	1	1.61138	0.0277778	SMAD4
GO:0099514	synaptic vesicle cytoskeletal transport	Biological process	1	16	36	23276	40.4097	0.0244693	1	1.61138	0.0277778	AP3D1
GO:0099517	synaptic vesicle transport along microtubule	Biological process	1	16	36	23276	40.4097	0.0244693	1	1.61138	0.0277778	AP3D1
GO:0051223	regulation of protein transport	Biological process	4	724	36	23276	3.57213	0.0248653	1	1.60441	0.111111	ANO1//ACSL3//SMAD4//UBAC2
GO:0019725	cellular homeostasis	Biological process	4	726	36	23276	3.56229	0.0250871	1	1.60055	0.111111	APP//SMAD4//ANO1//AP3D1
GO:0050794	regulation of cellular process	Biological process	22	10125	36	23276	1.40486	0.0251689	1	1.59914	0.611111	EED//SMAD4//SATB2//UTRN//USP34//RASA2//PPP2R5C//ARHGAP12//PGAM5//CAMTA1//RCOR3//APP//ANO1//TNS3//OMA1//DENND1B//SYNE2//ACSL3//AP3D1//PARM1//CDK13//UBAC2
GO:0033365	protein localization to organelle	Biological process	4	731	36	23276	3.53792	0.0256471	1	1.59096	0.111111	SYNE2//SMAD4//UBAC2//AP3D1
GO:0001967	suckling behavior	Biological process	1	17	36	23276	38.0327	0.0259792	1	1.58537	0.0277778	APP
GO:0002076	osteoblast development	Biological process	1	17	36	23276	38.0327	0.0259792	1	1.58537	0.0277778	SATB2
GO:0006515	misfolded or incompletely synthesized protein catabolic process	Biological process	1	17	36	23276	38.0327	0.0259792	1	1.58537	0.0277778	OMA1
GO:0016048	detection of temperature stimulus	Biological process	1	17	36	23276	38.0327	0.0259792	1	1.58537	0.0277778	ANO1
GO:0032274	gonadotropin secretion	Biological process	1	17	36	23276	38.0327	0.0259792	1	1.58537	0.0277778	SMAD4
GO:0051797	regulation of hair follicle development	Biological process	1	17	36	23276	38.0327	0.0259792	1	1.58537	0.0277778	SMAD4
GO:0072520	seminiferous tubule development	Biological process	1	17	36	23276	38.0327	0.0259792	1	1.58537	0.0277778	SMAD4
GO:1902751	positive regulation of cell cycle G2/M phase transition	Biological process	1	17	36	23276	38.0327	0.0259792	1	1.58537	0.0277778	APP
GO:2000136	regulation of cell proliferation involved in heart morphogenesis	Biological process	1	17	36	23276	38.0327	0.0259792	1	1.58537	0.0277778	SMAD4
GO:0051648	vesicle localization	Biological process	2	162	36	23276	7.98217	0.0259819	1	1.58533	0.0555556	MYO5C//AP3D1
GO:0051047	positive regulation of secretion	Biological process	3	416	36	23276	4.66266	0.0261764	1	1.58209	0.0833333	SMAD4//ANO1//ACSL3
GO:0046907	intracellular transport	Biological process	6	1503	36	23276	2.58106	0.0263771	1	1.57877	0.166667	AP3D1//APP//SYNE2//ACSL3//SMAD4//UBAC2
GO:0008152	metabolic process	Biological process	22	10196	36	23276	1.39508	0.0274476	1	1.5615	0.611111	EED//SMAD4//SATB2//CDK13//ACSL3//OMA1//KCMF1//ACACA//MSRB3//PMS1//CAMTA1//RCOR3//USP34//LUC7L//APP//PGAM5//RASA2//DENND1B//PPP2R5C//KANSL1//PARM1//UBAC2
GO:0042592	homeostatic process	Biological process	6	1517	36	23276	2.55724	0.0274549	1	1.56138	0.166667	ACACA//APP//SMAD4//ANO1//AP3D1//OMA1
GO:0003181	atrioventricular valve morphogenesis	Biological process	1	18	36	23276	35.9198	0.0274867	1	1.56088	0.0277778	SMAD4
GO:0006349	regulation of gene expression by genetic imprinting	Biological process	1	18	36	23276	35.9198	0.0274867	1	1.56088	0.0277778	EED
GO:0061323	cell proliferation involved in heart morphogenesis	Biological process	1	18	36	23276	35.9198	0.0274867	1	1.56088	0.0277778	SMAD4
GO:0071870	cellular response to catecholamine stimulus	Biological process	1	18	36	23276	35.9198	0.0274867	1	1.56088	0.0277778	APP
GO:0097435	fibril organization	Biological process	1	18	36	23276	35.9198	0.0274867	1	1.56088	0.0277778	APP
GO:1903649	regulation of cytoplasmic transport	Biological process	3	426	36	23276	4.55321	0.0278223	1	1.55561	0.0833333	ACSL3//SMAD4//UBAC2
GO:0071840	cellular component organization or biogenesis	Biological process	14	5480	36	23276	1.65178	0.028658	1	1.54275	0.388889	SMAD4//SATB2//LUC7L//SYNE2//OMA1//DYM//APP//UTRN//EED//KANSL1//USP34//ACSL3//AP3D1//ACACA
GO:0034694	response to prostaglandin	Biological process	1	19	36	23276	34.0292	0.0289921	1	1.53772	0.0277778	ACACA
GO:0043984	histone H4-K16 acetylation	Biological process	1	19	36	23276	34.0292	0.0289921	1	1.53772	0.0277778	KANSL1
GO:0050951	sensory perception of temperature stimulus	Biological process	1	19	36	23276	34.0292	0.0289921	1	1.53772	0.0277778	ANO1
GO:0070861	regulation of protein exit from endoplasmic reticulum	Biological process	1	19	36	23276	34.0292	0.0289921	1	1.53772	0.0277778	UBAC2
GO:0071868	cellular response to monoamine stimulus	Biological process	1	19	36	23276	34.0292	0.0289921	1	1.53772	0.0277778	APP
GO:0071869	response to catecholamine	Biological process	1	19	36	23276	34.0292	0.0289921	1	1.53772	0.0277778	APP
GO:0006473	protein acetylation	Biological process	2	174	36	23276	7.43167	0.0296432	1	1.52807	0.0555556	KANSL1//SMAD4
GO:0061024	membrane organization	Biological process	4	771	36	23276	3.35437	0.0304013	1	1.51711	0.111111	SYNE2//OMA1//ACSL3//AP3D1
GO:0006298	mismatch repair	Biological process	1	20	36	23276	32.3278	0.0304951	1	1.51577	0.0277778	PMS1
GO:0007007	inner mitochondrial membrane organization	Biological process	1	20	36	23276	32.3278	0.0304951	1	1.51577	0.0277778	OMA1
GO:0071108	protein K48-linked deubiquitination	Biological process	1	20	36	23276	32.3278	0.0304951	1	1.51577	0.0277778	USP34
GO:0071867	response to monoamine	Biological process	1	20	36	23276	32.3278	0.0304951	1	1.51577	0.0277778	APP
GO:0006875	cellular metal ion homeostasis	Biological process	3	445	36	23276	4.3588	0.0310997	1	1.50724	0.0833333	APP//SMAD4//AP3D1
GO:0070201	regulation of establishment of protein localization	Biological process	4	781	36	23276	3.31142	0.0316669	1	1.49939	0.111111	ANO1//ACSL3//SMAD4//UBAC2
GO:0072330	monocarboxylic acid biosynthetic process	Biological process	2	181	36	23276	7.14426	0.0318689	1	1.49663	0.0555556	ACACA//ACSL3
GO:0003171	atrioventricular valve development	Biological process	1	21	36	23276	30.7884	0.0319959	1	1.49491	0.0277778	SMAD4
GO:0006882	cellular zinc ion homeostasis	Biological process	1	21	36	23276	30.7884	0.0319959	1	1.49491	0.0277778	AP3D1
GO:0032469	endoplasmic reticulum calcium ion homeostasis	Biological process	1	21	36	23276	30.7884	0.0319959	1	1.49491	0.0277778	APP
GO:0034377	plasma lipoprotein particle assembly	Biological process	1	21	36	23276	30.7884	0.0319959	1	1.49491	0.0277778	ACSL3
GO:0051642	centrosome localization	Biological process	1	21	36	23276	30.7884	0.0319959	1	1.49491	0.0277778	SYNE2
GO:0070734	histone H3-K27 methylation	Biological process	1	21	36	23276	30.7884	0.0319959	1	1.49491	0.0277778	EED
GO:0071354	cellular response to interleukin-6	Biological process	1	21	36	23276	30.7884	0.0319959	1	1.49491	0.0277778	SMAD4
GO:0032502	developmental process	Biological process	14	5585	36	23276	1.62073	0.0333804	1	1.47651	0.388889	SMAD4//PITPNB//SATB2//ARHGAP12//ANO1//APP//UTRN//OMA1//CDK13//LRIG1//AP3D1//LUC7L//TNS3//DYM
GO:0003203	endocardial cushion morphogenesis	Biological process	1	22	36	23276	29.3889	0.0334944	1	1.47503	0.0277778	SMAD4
GO:0007176	regulation of epidermal growth factor-activated receptor activity	Biological process	1	22	36	23276	29.3889	0.0334944	1	1.47503	0.0277778	APP
GO:0016578	histone deubiquitination	Biological process	1	22	36	23276	29.3889	0.0334944	1	1.47503	0.0277778	USP34
GO:0035235	ionotropic glutamate receptor signaling pathway	Biological process	1	22	36	23276	29.3889	0.0334944	1	1.47503	0.0277778	APP
GO:0055069	zinc ion homeostasis	Biological process	1	22	36	23276	29.3889	0.0334944	1	1.47503	0.0277778	AP3D1
GO:0060065	uterus development	Biological process	1	22	36	23276	29.3889	0.0334944	1	1.47503	0.0277778	SMAD4
GO:0060438	trachea development	Biological process	1	22	36	23276	29.3889	0.0334944	1	1.47503	0.0277778	ANO1
GO:0006928	movement of cell or subcellular component	Biological process	6	1590	36	23276	2.43983	0.033558	1	1.4742	0.166667	SATB2//SMAD4//APP//AP3D1//SYNE2//TNS3
GO:0051222	positive regulation of protein transport	Biological process	3	459	36	23276	4.22585	0.0336402	1	1.47314	0.0833333	ANO1//ACSL3//SMAD4
GO:0006376	mRNA splice site selection	Biological process	1	23	36	23276	28.1111	0.0349907	1	1.45605	0.0277778	LUC7L
GO:0007184	SMAD protein import into nucleus	Biological process	1	23	36	23276	28.1111	0.0349907	1	1.45605	0.0277778	SMAD4
GO:0008089	anterograde axonal transport	Biological process	1	23	36	23276	28.1111	0.0349907	1	1.45605	0.0277778	AP3D1
GO:0030511	positive regulation of transforming growth factor beta receptor signaling pathway	Biological process	1	23	36	23276	28.1111	0.0349907	1	1.45605	0.0277778	SMAD4
GO:0060317	cardiac epithelial to mesenchymal transition	Biological process	1	23	36	23276	28.1111	0.0349907	1	1.45605	0.0277778	SMAD4
GO:0070741	response to interleukin-6	Biological process	1	23	36	23276	28.1111	0.0349907	1	1.45605	0.0277778	SMAD4
GO:1903846	positive regulation of cellular response to transforming growth factor beta stimulus	Biological process	1	23	36	23276	28.1111	0.0349907	1	1.45605	0.0277778	SMAD4
GO:0015031	protein transport	Biological process	6	1611	36	23276	2.40803	0.0354675	1	1.45017	0.166667	AP3D1//ANO1//ACSL3//SMAD4//UBAC2//DENND1B
GO:0033036	macromolecule localization	Biological process	8	2518	36	23276	2.05419	0.0354905	1	1.44989	0.222222	AP3D1//DENND1B//PITPNB//SYNE2//ANO1//ACSL3//SMAD4//UBAC2
GO:0002369	T cell cytokine production	Biological process	1	24	36	23276	26.9398	0.0364847	1	1.43789	0.0277778	DENND1B
GO:0008053	mitochondrial fusion	Biological process	1	24	36	23276	26.9398	0.0364847	1	1.43789	0.0277778	OMA1
GO:0060384	innervation	Biological process	1	24	36	23276	26.9398	0.0364847	1	1.43789	0.0277778	LRIG1
GO:0065005	protein-lipid complex assembly	Biological process	1	24	36	23276	26.9398	0.0364847	1	1.43789	0.0277778	ACSL3
GO:1904292	regulation of ERAD pathway	Biological process	1	24	36	23276	26.9398	0.0364847	1	1.43789	0.0277778	UBAC2
GO:0000377	RNA splicing, via transesterification reactions with bulged adenosine as nucleophile	Biological process	2	196	36	23276	6.59751	0.0368527	1	1.43353	0.0555556	CDK13//LUC7L
GO:0000398	mRNA splicing, via spliceosome	Biological process	2	196	36	23276	6.59751	0.0368527	1	1.43353	0.0555556	CDK13//LUC7L
GO:0007411	axon guidance	Biological process	2	196	36	23276	6.59751	0.0368527	1	1.43353	0.0555556	APP//SMAD4
GO:0000375	RNA splicing, via transesterification reactions	Biological process	2	197	36	23276	6.56402	0.0371951	1	1.42951	0.0555556	CDK13//LUC7L
GO:0097485	neuron projection guidance	Biological process	2	197	36	23276	6.56402	0.0371951	1	1.42951	0.0555556	SMAD4//APP
GO:0002021	response to dietary excess	Biological process	1	25	36	23276	25.8622	0.0379765	1	1.42049	0.0277778	OMA1
GO:0042634	regulation of hair cycle	Biological process	1	25	36	23276	25.8622	0.0379765	1	1.42049	0.0277778	SMAD4
GO:0071634	regulation of transforming growth factor beta production	Biological process	1	25	36	23276	25.8622	0.0379765	1	1.42049	0.0277778	SMAD4
GO:0016071	mRNA metabolic process	Biological process	3	486	36	23276	3.99108	0.0388385	1	1.41074	0.0833333	CDK13//LUC7L//APP
GO:0007018	microtubule-based movement	Biological process	2	203	36	23276	6.37001	0.0392752	1	1.40588	0.0555556	APP//AP3D1
GO:0050832	defense response to fungus	Biological process	1	26	36	23276	24.8675	0.039466	1	1.40378	0.0277778	APP
GO:0070266	necroptotic process	Biological process	1	26	36	23276	24.8675	0.039466	1	1.40378	0.0277778	PGAM5
GO:0071398	cellular response to fatty acid	Biological process	1	26	36	23276	24.8675	0.039466	1	1.40378	0.0277778	ACACA
GO:0071604	transforming growth factor beta production	Biological process	1	26	36	23276	24.8675	0.039466	1	1.40378	0.0277778	SMAD4
GO:1902932	positive regulation of alcohol biosynthetic process	Biological process	1	26	36	23276	24.8675	0.039466	1	1.40378	0.0277778	ACSL3
GO:0043170	macromolecule metabolic process	Biological process	18	8031	36	23276	1.44913	0.0397386	1	1.40079	0.5	EED//SMAD4//SATB2//CDK13//KCMF1//PMS1//CAMTA1//RCOR3//USP34//LUC7L//APP//OMA1//MSRB3//PPP2R5C//KANSL1//ACACA//PARM1//UBAC2
GO:0006886	intracellular protein transport	Biological process	4	840	36	23276	3.07884	0.0397694	1	1.40045	0.111111	ACSL3//SMAD4//UBAC2//AP3D1
GO:0043543	protein acylation	Biological process	2	205	36	23276	6.30786	0.0399784	1	1.39817	0.0555556	KANSL1//SMAD4
GO:1904951	positive regulation of establishment of protein localization	Biological process	3	494	36	23276	3.92645	0.0404538	1	1.39304	0.0833333	ANO1//ACSL3//SMAD4
GO:0030003	cellular cation homeostasis	Biological process	3	495	36	23276	3.91852	0.0406581	1	1.39085	0.0833333	APP//SMAD4//AP3D1
GO:0030970	retrograde protein transport, ER to cytosol	Biological process	1	27	36	23276	23.9465	0.0409533	1	1.38771	0.0277778	UBAC2
GO:2000826	regulation of heart morphogenesis	Biological process	1	27	36	23276	23.9465	0.0409533	1	1.38771	0.0277778	SMAD4
GO:0009895	negative regulation of catabolic process	Biological process	2	211	36	23276	6.12849	0.0421165	1	1.37555	0.0555556	SMAD4//UBAC2
GO:0035066	positive regulation of histone acetylation	Biological process	1	28	36	23276	23.0913	0.0424383	1	1.37224	0.0277778	SMAD4
GO:0048668	collateral sprouting	Biological process	1	28	36	23276	23.0913	0.0424383	1	1.37224	0.0277778	APP
GO:0051647	nucleus localization	Biological process	1	28	36	23276	23.0913	0.0424383	1	1.37224	0.0277778	SYNE2
GO:0051973	positive regulation of telomerase activity	Biological process	1	28	36	23276	23.0913	0.0424383	1	1.37224	0.0277778	PARM1
GO:0006873	cellular ion homeostasis	Biological process	3	509	36	23276	3.81074	0.0435741	1	1.36077	0.0833333	APP//SMAD4//AP3D1
GO:0006084	acetyl-CoA metabolic process	Biological process	1	29	36	23276	22.295	0.0439211	1	1.35733	0.0277778	ACACA
GO:0006829	zinc II ion transport	Biological process	1	29	36	23276	22.295	0.0439211	1	1.35733	0.0277778	AP3D1
GO:0051569	regulation of histone H3-K4 methylation	Biological process	1	29	36	23276	22.295	0.0439211	1	1.35733	0.0277778	SMAD4
GO:0051641	cellular localization	Biological process	8	2631	36	23276	1.96596	0.0444197	1	1.35242	0.222222	AP3D1//SYNE2//APP//SMAD4//MYO5C//ANO1//ACSL3//UBAC2
GO:0006820	anion transport	Biological process	3	514	36	23276	3.77367	0.0446406	1	1.35027	0.0833333	ANO1//PITPNB//ACSL3
GO:0006357	regulation of transcription from RNA polymerase II promoter	Biological process	6	1706	36	23276	2.27394	0.044996	1	1.34683	0.166667	EED//SMAD4//SATB2//CAMTA1//APP//CDK13
GO:0055065	metal ion homeostasis	Biological process	3	516	36	23276	3.75904	0.0450709	1	1.3461	0.0833333	APP//SMAD4//AP3D1
GO:0007617	mating behavior	Biological process	1	30	36	23276	21.5519	0.0454017	1	1.34293	0.0277778	APP
GO:0008038	neuron recognition	Biological process	1	30	36	23276	21.5519	0.0454017	1	1.34293	0.0277778	APP
GO:2000758	positive regulation of peptidyl-lysine acetylation	Biological process	1	30	36	23276	21.5519	0.0454017	1	1.34293	0.0277778	SMAD4
GO:1903827	regulation of cellular protein localization	Biological process	3	518	36	23276	3.74453	0.0455033	1	1.34196	0.0833333	ACSL3//SMAD4//UBAC2
GO:0035774	positive regulation of insulin secretion involved in cellular response to glucose stimulus	Biological process	1	31	36	23276	20.8566	0.04688	1	1.32901	0.0277778	ANO1
GO:0043001	Golgi to plasma membrane protein transport	Biological process	1	31	36	23276	20.8566	0.04688	1	1.32901	0.0277778	ACSL3
GO:0050808	synapse organization	Biological process	2	224	36	23276	5.77282	0.0468936	1	1.32889	0.0555556	UTRN//APP
GO:0031328	positive regulation of cellular biosynthetic process	Biological process	6	1724	36	23276	2.25019	0.0469692	1	1.32819	0.166667	SMAD4//CAMTA1//APP//SATB2//PARM1//ACSL3
GO:0044093	positive regulation of molecular function	Biological process	5	1297	36	23276	2.4925	0.0478766	1	1.31988	0.138889	APP//RASA2//DENND1B//PGAM5//PARM1
GO:0031326	regulation of cellular biosynthetic process	Biological process	10	3679	36	23276	1.75742	0.0479305	1	1.31939	0.277778	EED//SMAD4//SATB2//CAMTA1//USP34//RCOR3//APP//PARM1//CDK13//ACSL3
GO:0003179	heart valve morphogenesis	Biological process	1	32	36	23276	20.2049	0.0483561	1	1.31555	0.0277778	SMAD4
GO:0042092	type 2 immune response	Biological process	1	32	36	23276	20.2049	0.0483561	1	1.31555	0.0277778	DENND1B
GO:0071827	plasma lipoprotein particle organization	Biological process	1	32	36	23276	20.2049	0.0483561	1	1.31555	0.0277778	ACSL3
GO:0090004	positive regulation of establishment of protein localization to plasma membrane	Biological process	1	32	36	23276	20.2049	0.0483561	1	1.31555	0.0277778	ACSL3
GO:0051336	regulation of hydrolase activity	Biological process	4	900	36	23276	2.87358	0.0491335	1	1.30862	0.111111	APP//RASA2//DENND1B//PGAM5
GO:0003197	endocardial cushion development	Biological process	1	33	36	23276	19.5926	0.04983	1	1.30251	0.0277778	SMAD4
GO:0006998	nuclear envelope organization	Biological process	1	33	36	23276	19.5926	0.04983	1	1.30251	0.0277778	SYNE2
GO:0010718	positive regulation of epithelial to mesenchymal transition	Biological process	1	33	36	23276	19.5926	0.04983	1	1.30251	0.0277778	SMAD4
GO:0019884	antigen processing and presentation of exogenous antigen	Biological process	1	33	36	23276	19.5926	0.04983	1	1.30251	0.0277778	AP3D1
GO:0046470	phosphatidylcholine metabolic process	Biological process	1	33	36	23276	19.5926	0.04983	1	1.30251	0.0277778	ACSL3
GO:0071514	genetic imprinting	Biological process	1	33	36	23276	19.5926	0.04983	1	1.30251	0.0277778	EED
GO:0097009	energy homeostasis	Biological process	1	33	36	23276	19.5926	0.04983	1	1.30251	0.0277778	OMA1
GO:0019222	regulation of metabolic process	Biological process	14	5882	36	23276	1.53889	0.0499485	1	1.30148	0.388889	EED//SMAD4//SATB2//CAMTA1//USP34//RCOR3//APP//RASA2//DENND1B//PGAM5//PARM1//CDK13//UBAC2//ACSL3
GO:0044424	intracellular part	Cellular component	34	12670	35	23196	1.77847	1.89593e-08	9.89215e-06	7.72218	0.971429	PPP2R5C//CAMTA1//ANO1//ACACA//RASA2//AP3D1//APP//DTNB//MAGI1//SMAD4//SATB2//UTRN//PARM1//SYNE2//TNS3//DENND1B//PITPNB//SVEP1//DYM//CDK13//DCAF8//OMA1//KANSL1//PGAM5//ACSL3//PMS1//MSRB3//UBAC2//USP34//LUC7L//EED//RCOR3//SPECC1//MYO5C
GO:0005622	intracellular	Cellular component	34	12802	35	23196	1.76014	2.66635e-08	9.89215e-06	7.57408	0.971429	SATB2//KANSL1//USP34//PPP2R5C//SMAD4//PMS1//EED//CDK13//ACACA//SYNE2//MSRB3//OMA1//PGAM5//ACSL3//UBAC2//CAMTA1//MAGI1//RCOR3//PARM1//SPECC1//LUC7L//DCAF8//APP//ANO1//RASA2//AP3D1//DTNB//UTRN//TNS3//DENND1B//PITPNB//SVEP1//DYM//MYO5C
GO:0044464	cell part	Cellular component	34	14770	35	23196	1.52561	2.8509e-06	0.000545334	5.54502	0.971429	ANO1//RASA2//APP//MAGI1//UTRN//PARM1//SYNE2//SMAD4//PITPNB//PPP2R5C//CAMTA1//ACACA//AP3D1//DTNB//SATB2//TNS3//DENND1B//SVEP1//DYM//CDK13//DCAF8//OMA1//KANSL1//PGAM5//ACSL3//PMS1//EED//MSRB3//UBAC2//RCOR3//SPECC1//LUC7L//USP34//MYO5C
GO:0005623	cell	Cellular component	34	14784	35	23196	1.52417	2.9398e-06	0.000545334	5.53168	0.971429	ANO1//RASA2//APP//MAGI1//UTRN//PARM1//SYNE2//SATB2//KANSL1//USP34//PPP2R5C//SMAD4//PITPNB//PMS1//EED//CDK13//ACACA//MSRB3//OMA1//PGAM5//ACSL3//UBAC2//CAMTA1//RCOR3//SPECC1//LUC7L//DCAF8//AP3D1//DTNB//TNS3//DENND1B//SVEP1//DYM//MYO5C
GO:0043231	intracellular membrane-bounded organelle	Cellular component	28	9959	35	23196	1.86332	8.28375e-06	0.00122931	5.08177	0.8	ACACA//SYNE2//MSRB3//OMA1//PGAM5//ACSL3//UBAC2//CAMTA1//EED//MAGI1//SMAD4//SATB2//RCOR3//PARM1//PPP2R5C//SPECC1//LUC7L//CDK13//KANSL1//DCAF8//APP//AP3D1//PITPNB//DYM//MYO5C//USP34//PMS1//UTRN
GO:0043229	intracellular organelle	Cellular component	29	10996	35	23196	1.74787	1.62894e-05	0.00201445	4.7881	0.828571	APP//PARM1//ACSL3//DENND1B//ACACA//SYNE2//MSRB3//OMA1//PGAM5//UBAC2//CAMTA1//EED//MAGI1//SMAD4//SATB2//RCOR3//PPP2R5C//SPECC1//LUC7L//CDK13//KANSL1//DCAF8//AP3D1//PITPNB//DYM//UTRN//MYO5C//PMS1//USP34
GO:0043227	membrane-bounded organelle	Cellular component	29	11071	35	23196	1.73603	1.91729e-05	0.00203233	4.71731	0.828571	APP//PARM1//ACSL3//ACACA//SYNE2//MSRB3//OMA1//PGAM5//UBAC2//CAMTA1//EED//MAGI1//SMAD4//SATB2//RCOR3//PPP2R5C//SPECC1//LUC7L//CDK13//KANSL1//DCAF8//AP3D1//PITPNB//DYM//ANO1//MYO5C//UTRN//USP34//PMS1
GO:0043226	organelle	Cellular component	30	12018	35	23196	1.65438	2.70668e-05	0.00251044	4.56756	0.857143	APP//DENND1B//PARM1//ACSL3//ACACA//SYNE2//MSRB3//OMA1//PGAM5//UBAC2//CAMTA1//EED//MAGI1//SMAD4//SATB2//RCOR3//PPP2R5C//SPECC1//LUC7L//CDK13//KANSL1//DCAF8//AP3D1//PITPNB//DYM//ANO1//MYO5C//UTRN//PMS1//USP34
GO:0044428	nuclear part	Cellular component	14	3224	35	23196	2.87792	0.000127051	0.0104747	3.89602	0.4	SYNE2//APP//AP3D1//MAGI1//SATB2//UTRN//CDK13//ACACA//EED//PMS1//KANSL1//SMAD4//USP34//LUC7L
GO:0005737	cytoplasm	Cellular component	26	9903	35	23196	1.74001	0.000149763	0.0109268	3.8246	0.742857	APP//DENND1B//SYNE2//MYO5C//ACACA//MSRB3//OMA1//PGAM5//ACSL3//UBAC2//AP3D1//PARM1//PITPNB//DYM//CDK13//UTRN//CAMTA1//ANO1//RASA2//DTNB//MAGI1//SMAD4//SATB2//TNS3//SVEP1//DCAF8
GO:0005634	nucleus	Cellular component	20	6261	35	23196	2.11705	0.000161988	0.0109268	3.79052	0.571429	SMAD4//SATB2//CDK13//EED//KANSL1//USP34//PMS1//SYNE2//APP//AP3D1//MAGI1//UTRN//LUC7L//ACACA//CAMTA1//RCOR3//PARM1//PPP2R5C//SPECC1//DCAF8
GO:0030175	filopodium	Cellular component	3	78	35	23196	25.4901	0.000221537	0.0130929	3.65455	0.0857143	UTRN//SYNE2//APP
GO:0031527	filopodium membrane	Cellular component	2	15	35	23196	88.3657	0.00022939	0.0130929	3.63943	0.0571429	UTRN//SYNE2
GO:0031974	membrane-enclosed lumen	Cellular component	13	3110	35	23196	2.77031	0.000363761	0.0192793	3.43918	0.371429	APP//SYNE2//AP3D1//MAGI1//SATB2//UTRN//CDK13//ACACA//EED//PMS1//SMAD4//KANSL1//USP34
GO:0031981	nuclear lumen	Cellular component	12	2790	35	23196	2.85051	0.000518267	0.0256369	3.28545	0.342857	AP3D1//MAGI1//SATB2//UTRN//CDK13//ACACA//EED//PMS1//SMAD4//KANSL1//USP34//SYNE2
GO:1902494	catalytic complex	Cellular component	7	979	35	23196	4.73871	0.000556785	0.0258209	3.25431	0.2	SATB2//DCAF8//PPP2R5C//EED//KANSL1//USP34//CDK13
GO:0043234	protein complex	Cellular component	14	3826	35	23196	2.42509	0.000784342	0.0342342	3.10549	0.4	KANSL1//SMAD4//SATB2//SYNE2//APP//EED//UTRN//AP3D1//PMS1//ANO1//PPP2R5C//DCAF8//USP34//CDK13
GO:0044446	intracellular organelle part	Cellular component	18	5958	35	23196	2.00224	0.00097366	0.0401364	3.01159	0.514286	SYNE2//APP//KANSL1//AP3D1//MAGI1//SATB2//UTRN//CDK13//ACACA//EED//PMS1//OMA1//SMAD4//LUC7L//PGAM5//ACSL3//PPP2R5C//USP34
GO:0070013	intracellular organelle lumen	Cellular component	12	3046	35	23196	2.61094	0.00114918	0.0413236	2.93961	0.342857	SYNE2//AP3D1//MAGI1//SATB2//UTRN//CDK13//ACACA//EED//PMS1//SMAD4//KANSL1//USP34
GO:0044427	chromosomal part	Cellular component	6	803	35	23196	4.952	0.00116172	0.0413236	2.9349	0.171429	KANSL1//SMAD4//SATB2//PMS1//PPP2R5C//EED
GO:0043233	organelle lumen	Cellular component	12	3052	35	23196	2.6058	0.00116954	0.0413236	2.93199	0.342857	SYNE2//AP3D1//MAGI1//SATB2//UTRN//CDK13//ACACA//EED//PMS1//SMAD4//KANSL1//USP34
GO:0044422	organelle part	Cellular component	18	6159	35	23196	1.9369	0.0014775	0.0479369	2.83047	0.514286	SYNE2//OMA1//APP//PGAM5//ACSL3//AP3D1//PPP2R5C//KANSL1//SMAD4//SATB2//PMS1//MAGI1//UTRN//CDK13//ACACA//EED//USP34//LUC7L
GO:0032991	macromolecular complex	Cellular component	15	4571	35	23196	2.17483	0.00148592	0.0479369	2.82801	0.428571	SMAD4//UTRN//SATB2//KANSL1//SYNE2//APP//EED//AP3D1//PMS1//DCAF8//LUC7L//PPP2R5C//ANO1//CDK13//USP34
GO:0044451	nucleoplasm part	Cellular component	5	592	35	23196	5.59749	0.00183431	0.0566147	2.73653	0.142857	SATB2//KANSL1//CDK13//EED//USP34
GO:0031968	organelle outer membrane	Cellular component	3	164	35	23196	12.1233	0.00192349	0.0566147	2.71591	0.0857143	SYNE2//PGAM5//ACSL3
GO:0005694	chromosome	Cellular component	6	895	35	23196	4.44297	0.00201968	0.0566147	2.69472	0.171429	PMS1//EED//PPP2R5C//KANSL1//SMAD4//SATB2
GO:0019867	outer membrane	Cellular component	3	168	35	23196	11.8347	0.0020601	0.0566147	2.68611	0.0857143	SYNE2//PGAM5//ACSL3
GO:0098858	actin-based cell projection	Cellular component	3	172	35	23196	11.5595	0.00220263	0.0583696	2.65706	0.0857143	UTRN//APP//SYNE2
GO:0005794	Golgi apparatus	Cellular component	7	1253	35	23196	3.70247	0.00234131	0.0599053	2.63054	0.2	AP3D1//APP//PARM1//PITPNB//DYM//CDK13//ACSL3
GO:1990234	transferase complex	Cellular component	5	665	35	23196	4.98303	0.00303759	0.0751297	2.51747	0.142857	DCAF8//KANSL1//EED//USP34//CDK13
GO:0031594	neuromuscular junction	Cellular component	2	60	35	23196	22.0914	0.00370568	0.0886973	2.43113	0.0571429	APP//UTRN
GO:0035097	histone methyltransferase complex	Cellular component	2	73	35	23196	18.1573	0.00543492	0.126022	2.26481	0.0571429	EED//KANSL1
GO:0044454	nuclear chromosome part	Cellular component	4	510	35	23196	5.19798	0.00704993	0.15571	2.15182	0.114286	SMAD4//SATB2//PMS1//EED
GO:0000123	histone acetyltransferase complex	Cellular component	2	84	35	23196	15.7796	0.00713496	0.15571	2.14661	0.0571429	USP34//KANSL1
GO:0012505	endomembrane system	Cellular component	11	3333	35	23196	2.18727	0.00793919	0.164399	2.10022	0.314286	MSRB3//UBAC2//ACSL3//SYNE2//APP//PARM1//AP3D1//PITPNB//DYM//CDK13//MYO5C
GO:0034708	methyltransferase complex	Cellular component	2	89	35	23196	14.8931	0.0079774	0.164399	2.09814	0.0571429	EED//KANSL1
GO:0005654	nucleoplasm	Cellular component	8	1989	35	23196	2.66563	0.00831235	0.164399	2.08028	0.228571	SATB2//KANSL1//USP34//CDK13//EED//AP3D1//MAGI1//UTRN
GO:0000228	nuclear chromosome	Cellular component	4	541	35	23196	4.90013	0.00864333	0.164399	2.06332	0.114286	PMS1//EED//SMAD4//SATB2
GO:0031248	protein acetyltransferase complex	Cellular component	2	94	35	23196	14.1009	0.00886248	0.164399	2.05244	0.0571429	KANSL1//USP34
GO:1902493	acetyltransferase complex	Cellular component	2	94	35	23196	14.1009	0.00886248	0.164399	2.05244	0.0571429	KANSL1//USP34
GO:0098805	whole membrane	Cellular component	7	1609	35	23196	2.88328	0.00919693	0.166442	2.03636	0.2	AP3D1//SYNE2//PGAM5//ACSL3//APP//ANO1//UTRN
GO:0031967	organelle envelope	Cellular component	5	904	35	23196	3.66561	0.0109367	0.186914	1.96111	0.142857	SYNE2//APP//OMA1//PGAM5//ACSL3
GO:0043195	terminal bouton	Cellular component	2	105	35	23196	12.6237	0.0109565	0.186914	1.96033	0.0571429	AP3D1//APP
GO:0031975	envelope	Cellular component	5	907	35	23196	3.65349	0.0110838	0.186914	1.95531	0.142857	SYNE2//APP//OMA1//PGAM5//ACSL3
GO:0000790	nuclear chromatin	Cellular component	3	322	35	23196	6.17462	0.0124926	0.20599	1.90335	0.0857143	EED//SMAD4//SATB2
GO:0035253	ciliary rootlet	Cellular component	1	10	35	23196	66.2743	0.0149897	0.240973	1.82421	0.0285714	APP
GO:0043228	non-membrane-bounded organelle	Cellular component	11	3655	35	23196	1.99457	0.0155886	0.240973	1.80719	0.314286	KANSL1//EED//PPP2R5C//ACACA//ACSL3//SYNE2//UTRN//PMS1//APP//SMAD4//SATB2
GO:0043232	intracellular non-membrane-bounded organelle	Cellular component	11	3655	35	23196	1.99457	0.0155886	0.240973	1.80719	0.314286	KANSL1//EED//PPP2R5C//ACACA//ACSL3//SYNE2//UTRN//PMS1//APP//SMAD4//SATB2
GO:0031235	intrinsic component of the cytoplasmic side of the plasma membrane	Cellular component	1	12	35	23196	55.2286	0.0179613	0.261319	1.74566	0.0285714	RASA2
GO:0070938	contractile ring	Cellular component	1	12	35	23196	55.2286	0.0179613	0.261319	1.74566	0.0285714	UTRN
GO:0097449	astrocyte projection	Cellular component	1	12	35	23196	55.2286	0.0179613	0.261319	1.74566	0.0285714	APP
GO:0030027	lamellipodium	Cellular component	2	142	35	23196	9.33441	0.0194031	0.272214	1.71213	0.0571429	SYNE2//APP
GO:0005641	nuclear envelope lumen	Cellular component	1	13	35	23196	50.9802	0.0194438	0.272214	1.71122	0.0285714	APP
GO:0005640	nuclear outer membrane	Cellular component	1	14	35	23196	47.3388	0.0209242	0.279844	1.67935	0.0285714	SYNE2
GO:0019908	nuclear cyclin-dependent protein kinase holoenzyme complex	Cellular component	1	14	35	23196	47.3388	0.0209242	0.279844	1.67935	0.0285714	CDK13
GO:0005741	mitochondrial outer membrane	Cellular component	2	149	35	23196	8.89588	0.0212307	0.279844	1.67304	0.0571429	PGAM5//ACSL3
GO:0030426	growth cone	Cellular component	2	150	35	23196	8.83657	0.0214975	0.279844	1.66761	0.0571429	APP//UTRN
GO:0071004	U2-type prespliceosome	Cellular component	1	15	35	23196	44.1829	0.0224024	0.280767	1.64971	0.0285714	LUC7L
GO:0030427	site of polarized growth	Cellular component	2	155	35	23196	8.55152	0.0228522	0.280767	1.64107	0.0571429	APP//UTRN
GO:0000159	protein phosphatase type 2A complex	Cellular component	1	16	35	23196	41.4214	0.0238784	0.280767	1.62199	0.0285714	PPP2R5C
GO:0035098	ESC/E(Z) complex	Cellular component	1	16	35	23196	41.4214	0.0238784	0.280767	1.62199	0.0285714	EED
GO:0097386	glial cell projection	Cellular component	1	16	35	23196	41.4214	0.0238784	0.280767	1.62199	0.0285714	APP
GO:0044444	cytoplasmic part	Cellular component	16	6674	35	23196	1.58884	0.0244741	0.280767	1.61129	0.457143	ACACA//SYNE2//MSRB3//OMA1//PGAM5//ACSL3//UBAC2//APP//PARM1//AP3D1//PITPNB//DYM//CDK13//DENND1B//MYO5C//UTRN
GO:0005685	U1 snRNP	Cellular component	1	17	35	23196	38.9849	0.0253523	0.280767	1.59598	0.0285714	LUC7L
GO:0016010	dystrophin-associated glycoprotein complex	Cellular component	1	17	35	23196	38.9849	0.0253523	0.280767	1.59598	0.0285714	UTRN
GO:0030134	ER to Golgi transport vesicle	Cellular component	1	17	35	23196	38.9849	0.0253523	0.280767	1.59598	0.0285714	APP
GO:0090665	glycoprotein complex	Cellular component	1	17	35	23196	38.9849	0.0253523	0.280767	1.59598	0.0285714	UTRN
GO:0005912	adherens junction	Cellular component	3	426	35	23196	4.6672	0.0260753	0.284527	1.58377	0.0857143	SYNE2//TNS3//MAGI1
GO:0000775	chromosome, centromeric region	Cellular component	2	171	35	23196	7.75138	0.0274171	0.294834	1.56198	0.0571429	KANSL1//PPP2R5C
GO:0043679	axon terminus	Cellular component	2	173	35	23196	7.66177	0.0280117	0.296924	1.55266	0.0571429	AP3D1//APP
GO:0070161	anchoring junction	Cellular component	3	443	35	23196	4.4881	0.0288282	0.301275	1.54018	0.0857143	MAGI1//SYNE2//TNS3
GO:0045120	pronucleus	Cellular component	1	21	35	23196	31.5592	0.0312262	0.317395	1.50548	0.0285714	EED
GO:0071010	prespliceosome	Cellular component	1	21	35	23196	31.5592	0.0312262	0.317395	1.50548	0.0285714	LUC7L
GO:0044306	neuron projection terminus	Cellular component	2	186	35	23196	7.12627	0.032002	0.320885	1.49482	0.0571429	AP3D1//APP
GO:0045202	synapse	Cellular component	4	817	35	23196	3.24476	0.0336843	0.33325	1.47257	0.114286	APP//UTRN//AP3D1//DTNB
GO:0080008	Cul4-RING E3 ubiquitin ligase complex	Cellular component	1	23	35	23196	28.8149	0.0341502	0.333414	1.46661	0.0285714	DCAF8
GO:0000785	chromatin	Cellular component	3	478	35	23196	4.15947	0.0349672	0.336957	1.45634	0.0857143	SMAD4//SATB2//EED
GO:0051233	spindle midzone	Cellular component	1	27	35	23196	24.546	0.0399726	0.380252	1.39824	0.0285714	APP
GO:0044665	MLL1/2 complex	Cellular component	1	28	35	23196	23.6694	0.0414228	0.384197	1.38276	0.0285714	KANSL1
GO:0071339	MLL1 complex	Cellular component	1	28	35	23196	23.6694	0.0414228	0.384197	1.38276	0.0285714	KANSL1
GO:0005739	mitochondrion	Cellular component	6	1736	35	23196	2.29059	0.0434749	0.398251	1.36176	0.171429	PGAM5//ACSL3//OMA1//ACACA//SYNE2//MSRB3
GO:0070461	SAGA-type complex	Cellular component	1	31	35	23196	21.3788	0.0457608	0.412051	1.33951	0.0285714	USP34
GO:0031966	mitochondrial membrane	Cellular component	3	534	35	23196	3.72327	0.0460924	0.412051	1.33637	0.0857143	PGAM5//ACSL3//OMA1
GO:0000307	cyclin-dependent protein kinase holoenzyme complex	Cellular component	1	32	35	23196	20.7107	0.0472026	0.412051	1.32603	0.0285714	CDK13
GO:0016235	aggresome	Cellular component	1	32	35	23196	20.7107	0.0472026	0.412051	1.32603	0.0285714	SYNE2
GO:0000803	sex chromosome	Cellular component	1	33	35	23196	20.0831	0.0486422	0.419681	1.31299	0.0285714	EED
GO:0008047	enzyme activator activity	Molecular function	4	393	35	22849	6.64457	0.00296114	1	2.52854	0.114286	RASA2//PGAM5//ARHGAP12//APP
GO:0005096	GTPase activator activity	Molecular function	3	224	35	22849	8.74324	0.00482839	1	2.3162	0.0857143	RASA2//PGAM5//ARHGAP12
GO:0030695	GTPase regulator activity	Molecular function	3	242	35	22849	8.09292	0.00598129	1	2.2232	0.0857143	RASA2//PGAM5//ARHGAP12
GO:0003682	chromatin binding	Molecular function	4	487	35	22849	5.36204	0.00632693	1	2.19881	0.114286	EED//SMAD4//SATB2//SVEP1
GO:0060589	nucleoside-triphosphatase regulator activity	Molecular function	3	264	35	22849	7.41851	0.00759743	1	2.11933	0.0857143	RASA2//PGAM5//ARHGAP12
GO:0098772	molecular function regulator	Molecular function	6	1156	35	22849	3.38838	0.00761659	1	2.11824	0.171429	DENND1B//APP//RASA2//PGAM5//ARHGAP12//PPP2R5C
GO:0044877	macromolecular complex binding	Molecular function	7	1536	35	22849	2.97513	0.00778986	1	2.10847	0.2	EED//SMAD4//SATB2//SVEP1//PGAM5//UTRN//SYNE2
GO:0030234	enzyme regulator activity	Molecular function	5	870	35	22849	3.75189	0.00995321	1	2.00204	0.142857	APP//RASA2//PGAM5//ARHGAP12//PPP2R5C
GO:0051015	actin filament binding	Molecular function	2	118	35	22849	11.0649	0.0140794	1	1.85142	0.0571429	UTRN//SYNE2
GO:0031005	filamin binding	Molecular function	1	10	35	22849	65.2829	0.0152158	1	1.81771	0.0285714	SMAD4
GO:0033130	acetylcholine receptor binding	Molecular function	1	10	35	22849	65.2829	0.0152158	1	1.81771	0.0285714	APP
GO:0005057	receptor signaling protein activity	Molecular function	2	129	35	22849	10.1214	0.0166634	1	1.77824	0.0571429	PGAM5//SMAD4
GO:0005229	intracellular calcium activated chloride channel activity	Molecular function	1	11	35	22849	59.3481	0.0167249	1	1.77664	0.0285714	ANO1
GO:0005247	voltage-gated chloride channel activity	Molecular function	1	11	35	22849	59.3481	0.0167249	1	1.77664	0.0285714	ANO1
GO:0070411	I-SMAD binding	Molecular function	1	11	35	22849	59.3481	0.0167249	1	1.77664	0.0285714	SMAD4
GO:0017166	vinculin binding	Molecular function	1	12	35	22849	54.4024	0.0182318	1	1.73917	0.0285714	UTRN
GO:0004467	long-chain fatty acid-CoA ligase activity	Molecular function	1	13	35	22849	50.2176	0.0197365	1	1.70473	0.0285714	ACSL3
GO:0008601	protein phosphatase type 2A regulator activity	Molecular function	1	13	35	22849	50.2176	0.0197365	1	1.70473	0.0285714	PPP2R5C
GO:0016874	ligase activity	Molecular function	3	383	35	22849	5.11354	0.0205759	1	1.68664	0.0857143	ACACA//ACSL3//KCMF1
GO:0016671	oxidoreductase activity, acting on a sulfur group of donors, disulfide as acceptor	Molecular function	1	15	35	22849	43.5219	0.0227391	1	1.64323	0.0285714	MSRB3
GO:0008308	voltage-gated anion channel activity	Molecular function	1	16	35	22849	40.8018	0.024237	1	1.61552	0.0285714	ANO1
GO:0008353	RNA polymerase II carboxy-terminal domain kinase activity	Molecular function	1	16	35	22849	40.8018	0.024237	1	1.61552	0.0285714	CDK13
GO:0010485	H4 histone acetyltransferase activity	Molecular function	1	16	35	22849	40.8018	0.024237	1	1.61552	0.0285714	KANSL1
GO:0005488	binding	Molecular function	25	12258	35	22849	1.33143	0.0245891	1	1.60926	0.714286	ACACA//APP//DTNB//EED//MAGI1//SMAD4//SATB2//RCOR3//UTRN//PPP2R5C//LUC7L//PITPNB//ANO1//DYM//ACSL3//CDK13//PGAM5//SVEP1//SYNE2//CAMTA1//PMS1//RASA2//MSRB3//OMA1//KCMF1
GO:0015645	fatty acid ligase activity	Molecular function	1	20	35	22849	32.6414	0.0302065	1	1.5199	0.0285714	ACSL3
GO:0008092	cytoskeletal protein binding	Molecular function	4	799	35	22849	3.26823	0.0329272	1	1.48245	0.114286	UTRN//SYNE2//SMAD4//MAGI1
GO:0030332	cyclin binding	Molecular function	1	22	35	22849	29.674	0.033178	1	1.47915	0.0285714	CDK13
GO:0051393	alpha-actinin binding	Molecular function	1	23	35	22849	28.3839	0.0346604	1	1.46017	0.0285714	MAGI1
GO:0070412	R-SMAD binding	Molecular function	1	23	35	22849	28.3839	0.0346604	1	1.46017	0.0285714	SMAD4
GO:0043167	ion binding	Molecular function	13	5178	35	22849	1.63901	0.0375326	1	1.42559	0.371429	PITPNB//APP//ACACA//RASA2//DTNB//SMAD4//MSRB3//OMA1//KCMF1//SVEP1//MAGI1//CDK13//ACSL3
GO:0005227	calcium activated cation channel activity	Molecular function	1	28	35	22849	23.3153	0.0420393	1	1.37634	0.0285714	ANO1
GO:0042802	identical protein binding	Molecular function	5	1270	35	22849	2.57019	0.0427351	1	1.36922	0.142857	ANO1//SMAD4//APP//EED//LUC7L
GO:0017112	Rab guanyl-nucleotide exchange factor activity	Molecular function	1	29	35	22849	22.5113	0.0435085	1	1.36143	0.0285714	DENND1B
GO:0004693	cyclin-dependent protein serine/threonine kinase activity	Molecular function	1	31	35	22849	21.059	0.0464404	1	1.3331	0.0285714	CDK13
GO:0097472	cyclin-dependent protein kinase activity	Molecular function	1	31	35	22849	21.059	0.0464404	1	1.3331	0.0285714	CDK13
GO:0016504	peptidase activator activity	Molecular function	1	32	35	22849	20.4009	0.047903	1	1.31964	0.0285714	APP
GO:1901681	sulfur compound binding	Molecular function	2	233	35	22849	5.60368	0.0494316	1	1.306	0.0571429	APP//ACACA

## Sheet: up DSS+5-ASA vs DSS
#Column "GO.ID" stands for the ID of gene ontology term
#Column "Term" stands for the name of gene ontology term
#Column "Ontology" stands for the ontology of GOID belongs to
#Column "Count" stands for the number of DE genes associated with the listed GOID
#Column "Pop.Hits" stands for the number of background population genes associated with the listed GOID
#Column "List.Total" stands for the total number of DE genes
#Column "Pop.Total" stands for the total number of background population genes
#Column "Fold.Enrichment" stands for the Fold Enrichment value of the GOID, it equals (Count/Pop.Hits)/(List.Total/Pop.Total)
#Column "Pvalue" stands for the significance testing value of the GOID
#Column "FDR" stands for the false discovery rate of the GOID, using Benjamini & Hochberg (1995) method
#Column "Enrichment.Score" stands for the Enrichment Score value of the GOID, it equals (-log10(Pvalue))
#Column "Gene.Ratio" stands for the Gene Ratio value genes associated with the GOID, it equals (Count/List.Total)
#Column "GENES" stands for the DE genes associated with the GOID
GO.ID	Term	Ontology	Count	Pop.Hits	List.Total	Pop.Total	Fold.Enrichment	Pvalue	FDR	Enrichment.Score	Gene.Ratio	GENES
GO:0015914	phospholipid transport	Biological process	3	51	49	23276	27.9424	0.000170049	1	3.76943	0.0612245	ATP9A//ATP9B//PITPNB
GO:0015748	organophosphate ester transport	Biological process	3	70	49	23276	20.358	0.000434608	1	3.3619	0.0612245	ATP9A//ATP9B//PITPNB
GO:0018107	peptidyl-threonine phosphorylation	Biological process	3	80	49	23276	17.8133	0.000642749	1	3.19196	0.0612245	UBE2K//STK39//MYO3A
GO:0018210	peptidyl-threonine modification	Biological process	3	84	49	23276	16.965	0.000741032	1	3.13016	0.0612245	UBE2K//STK39//MYO3A
GO:0016568	chromatin modification	Biological process	6	547	49	23276	5.21046	0.000972298	1	3.0122	0.122449	NSD1//MBD2//SETD2//KAT6B//YEATS2//TDRD3
GO:0006890	retrograde vesicle-mediated transport, Golgi to ER	Biological process	2	25	49	23276	38.0016	0.00126277	1	2.89868	0.0408163	ATP9A//ATP9B
GO:0016569	covalent chromatin modification	Biological process	5	396	49	23276	5.99773	0.00143299	1	2.84376	0.102041	NSD1//MBD2//SETD2//KAT6B//YEATS2
GO:0006996	organelle organization	Biological process	15	3262	49	23276	2.18434	0.00217479	1	2.66258	0.306122	NSD1//KAT6B//SETD2//ARHGAP26//CAMSAP1//MAN2A1//STX8//MBD2//SYNE2//OMA1//DYM//PICALM//TDRD3//YEATS2//EIF4G3
GO:0006869	lipid transport	Biological process	4	270	49	23276	7.03734	0.00249016	1	2.60377	0.0816327	ATP9A//ATP9B//PITPNB//ANO6
GO:0006325	chromatin organization	Biological process	6	677	49	23276	4.20993	0.002859	1	2.54379	0.122449	NSD1//KAT6B//SETD2//MBD2//TDRD3//YEATS2
GO:0043268	positive regulation of potassium ion transport	Biological process	2	38	49	23276	25.0011	0.00290792	1	2.53642	0.0408163	ANO6//STK39
GO:0010256	endomembrane system organization	Biological process	5	471	49	23276	5.04268	0.00304475	1	2.51645	0.102041	SYNE2//DYM//ANO6//AP3D1//STX8
GO:0018205	peptidyl-lysine modification	Biological process	4	301	49	23276	6.31256	0.00367615	1	2.43461	0.0816327	NSD1//SETD2//KAT6B//YEATS2
GO:0010876	lipid localization	Biological process	4	305	49	23276	6.22978	0.00385282	1	2.41422	0.0816327	ANO6//ATP9A//ATP9B//PITPNB
GO:0016043	cellular component organization	Biological process	20	5340	49	23276	1.7791	0.00392913	1	2.4057	0.408163	NSD1//KAT6B//SETD2//ARHGAP26//CAMSAP1//MAN2A1//STX8//MBD2//SYNE2//OMA1//DYM//PICALM//SPRR2A1//ANO6//UBE2K//TDRD3//YEATS2//AP3D1//MYO3A//EIF4G3
GO:0018193	peptidyl-amino acid modification	Biological process	7	979	49	23276	3.39647	0.00418596	1	2.3782	0.142857	NSD1//SETD2//UBE2K//KAT6B//STK39//MYO3A//YEATS2
GO:0071840	cellular component organization or biogenesis	Biological process	20	5480	49	23276	1.73365	0.00536747	1	2.27023	0.408163	NSD1//KAT6B//SETD2//ARHGAP26//CAMSAP1//MAN2A1//STX8//MBD2//SYNE2//OMA1//DYM//PICALM//SPRR2A1//ANO6//UBE2K//TDRD3//YEATS2//AP3D1//MYO3A//EIF4G3
GO:0061024	membrane organization	Biological process	6	771	49	23276	3.69666	0.00538915	1	2.26848	0.122449	STX8//SYNE2//ANO6//OMA1//PICALM//AP3D1
GO:1901379	regulation of potassium ion transmembrane transport	Biological process	2	60	49	23276	15.834	0.00710905	1	2.14819	0.0408163	STK39//ANO6
GO:1902582	single-organism intracellular transport	Biological process	8	1362	49	23276	2.79013	0.00711755	1	2.14767	0.163265	XPO7//ATP9A//ATP9B//AP3D1//STX8//SETD2//PICALM//SYNE2
GO:0006811	ion transport	Biological process	8	1390	49	23276	2.73393	0.00801304	1	2.0962	0.163265	ANO6//AP3D1//ATP9A//ATP9B//PITPNB//CYTB//STK39//PICALM
GO:0006970	response to osmotic stress	Biological process	2	66	49	23276	14.3946	0.00854642	1	2.06822	0.0408163	CYTB//STK39
GO:0016570	histone modification	Biological process	4	386	49	23276	4.92249	0.0087682	1	2.05709	0.0816327	NSD1//SETD2//KAT6B//YEATS2
GO:0016197	endosomal transport	Biological process	3	207	49	23276	6.88435	0.00945756	1	2.02422	0.0612245	STX8//AP3D1//PICALM
GO:1902589	single-organism organelle organization	Biological process	11	2387	49	23276	2.18903	0.00953766	1	2.02056	0.22449	NSD1//ARHGAP26//STX8//MBD2//SETD2//OMA1//PICALM//KAT6B//YEATS2//EIF4G3//SYNE2
GO:0046907	intracellular transport	Biological process	8	1503	49	23276	2.52839	0.0125206	1	1.90238	0.163265	XPO7//AP3D1//STX8//ATP9A//ATP9B//SETD2//PICALM//SYNE2
GO:0000041	transition metal ion transport	Biological process	2	82	49	23276	11.5859	0.0129526	1	1.88764	0.0408163	AP3D1//PICALM
GO:0043266	regulation of potassium ion transport	Biological process	2	83	49	23276	11.4463	0.0132548	1	1.87763	0.0408163	STK39//ANO6
GO:0044802	single-organism membrane organization	Biological process	5	674	49	23276	3.52389	0.0133866	1	1.87333	0.102041	STX8//SYNE2//ANO6//OMA1//AP3D1
GO:0033036	macromolecule localization	Biological process	11	2518	49	23276	2.07515	0.0139511	1	1.85539	0.22449	XPO7//ANO6//AP3D1//STX8//SETD2//DENND1B//ATP9A//ATP9B//PITPNB//PICALM//SYNE2
GO:0051028	mRNA transport	Biological process	2	91	49	23276	10.44	0.0157811	1	1.80186	0.0408163	SETD2//XPO7
GO:0051276	chromosome organization	Biological process	6	977	49	23276	2.91722	0.0161741	1	1.79118	0.122449	NSD1//KAT6B//SETD2//MBD2//TDRD3//YEATS2
GO:0034968	histone lysine methylation	Biological process	2	96	49	23276	9.89626	0.0174567	1	1.75804	0.0408163	NSD1//SETD2
GO:0021700	developmental maturation	Biological process	3	262	49	23276	5.43916	0.0177518	1	1.75076	0.0612245	PICALM//ANO6//AP3D1
GO:0018105	peptidyl-serine phosphorylation	Biological process	3	268	49	23276	5.31739	0.0188391	1	1.72494	0.0612245	NSD1//STK39//MYO3A
GO:0034250	positive regulation of cellular amide metabolic process	Biological process	2	100	49	23276	9.50041	0.0188492	1	1.72471	0.0408163	EIF4G3//PICALM
GO:0051656	establishment of organelle localization	Biological process	3	269	49	23276	5.29763	0.0190239	1	1.7207	0.0612245	SYNE2//MYO5C//AP3D1
GO:0071702	organic substance transport	Biological process	10	2304	49	23276	2.06172	0.0200476	1	1.69794	0.204082	XPO7//ANO6//AP3D1//STX8//SETD2//DENND1B//ATP9A//ATP9B//PITPNB//PICALM
GO:0006897	endocytosis	Biological process	4	495	49	23276	3.83855	0.020153	1	1.69566	0.0816327	PICALM//ANO6//ATP9A//ATP9B
GO:0018022	peptidyl-lysine methylation	Biological process	2	104	49	23276	9.13501	0.0202871	1	1.69278	0.0408163	NSD1//SETD2
GO:0055076	transition metal ion homeostasis	Biological process	2	105	49	23276	9.04801	0.0206536	1	1.685	0.0408163	PICALM//AP3D1
GO:0006047	UDP-N-acetylglucosamine metabolic process	Biological process	1	10	49	23276	47.502	0.0208574	1	1.68074	0.0204082	GNE
GO:0032119	sequestering of zinc ion	Biological process	1	10	49	23276	47.502	0.0208574	1	1.68074	0.0204082	AP3D1
GO:0035563	positive regulation of chromatin binding	Biological process	1	10	49	23276	47.502	0.0208574	1	1.68074	0.0204082	MBD2
GO:0035590	purinergic nucleotide receptor signaling pathway	Biological process	1	10	49	23276	47.502	0.0208574	1	1.68074	0.0204082	ANO6
GO:0035630	bone mineralization involved in bone maturation	Biological process	1	10	49	23276	47.502	0.0208574	1	1.68074	0.0204082	ANO6
GO:0035646	endosome to melanosome transport	Biological process	1	10	49	23276	47.502	0.0208574	1	1.68074	0.0204082	AP3D1
GO:0035745	T-helper 2 cell cytokine production	Biological process	1	10	49	23276	47.502	0.0208574	1	1.68074	0.0204082	DENND1B
GO:0043485	endosome to pigment granule transport	Biological process	1	10	49	23276	47.502	0.0208574	1	1.68074	0.0204082	AP3D1
GO:0046689	response to mercury ion	Biological process	1	10	49	23276	47.502	0.0208574	1	1.68074	0.0204082	CYTB
GO:0048757	pigment granule maturation	Biological process	1	10	49	23276	47.502	0.0208574	1	1.68074	0.0204082	AP3D1
GO:0060340	positive regulation of type I interferon-mediated signaling pathway	Biological process	1	10	49	23276	47.502	0.0208574	1	1.68074	0.0204082	UBE2K
GO:0061088	regulation of sequestering of zinc ion	Biological process	1	10	49	23276	47.502	0.0208574	1	1.68074	0.0204082	AP3D1
GO:0044765	single-organism transport	Biological process	13	3409	49	23276	1.81146	0.0213295	1	1.67102	0.265306	XPO7//ANO6//AP3D1//ATP9A//ATP9B//STX8//SETD2//PITPNB//CYTB//PICALM//SYNE2//STK39//SLC18B1
GO:0018209	peptidyl-serine modification	Biological process	3	284	49	23276	5.01782	0.0219169	1	1.65922	0.0612245	STK39//MYO3A//NSD1
GO:0051234	establishment of localization	Biological process	15	4203	49	23276	1.69529	0.0227375	1	1.64326	0.306122	AP3D1//PICALM//STX8//XPO7//ANO6//CYTB//DENND1B//PITPNB//SLC18B1//ATP9A//ATP9B//SYNE2//SETD2//MYO5C//STK39
GO:0006820	anion transport	Biological process	4	514	49	23276	3.69666	0.0227734	1	1.64257	0.0816327	ANO6//ATP9A//ATP9B//PITPNB
GO:0006122	mitochondrial electron transport, ubiquinol to cytochrome c	Biological process	1	11	49	23276	43.1837	0.0229196	1	1.63979	0.0204082	CYTB
GO:0007097	nuclear migration	Biological process	1	11	49	23276	43.1837	0.0229196	1	1.63979	0.0204082	SYNE2
GO:0017121	phospholipid scrambling	Biological process	1	11	49	23276	43.1837	0.0229196	1	1.63979	0.0204082	ANO6
GO:0032060	bleb assembly	Biological process	1	11	49	23276	43.1837	0.0229196	1	1.63979	0.0204082	ANO6
GO:0032239	regulation of nucleobase-containing compound transport	Biological process	1	11	49	23276	43.1837	0.0229196	1	1.63979	0.0204082	SETD2
GO:0035743	CD4-positive, alpha-beta T cell cytokine production	Biological process	1	11	49	23276	43.1837	0.0229196	1	1.63979	0.0204082	DENND1B
GO:0043482	cellular pigment accumulation	Biological process	1	11	49	23276	43.1837	0.0229196	1	1.63979	0.0204082	AP3D1
GO:0071435	potassium ion export	Biological process	1	11	49	23276	43.1837	0.0229196	1	1.63979	0.0204082	ANO6
GO:0050657	nucleic acid transport	Biological process	2	112	49	23276	8.48251	0.0232959	1	1.63272	0.0408163	SETD2//XPO7
GO:0050658	RNA transport	Biological process	2	112	49	23276	8.48251	0.0232959	1	1.63272	0.0408163	SETD2//XPO7
GO:0051236	establishment of RNA localization	Biological process	2	115	49	23276	8.26122	0.0244688	1	1.61139	0.0408163	SETD2//XPO7
GO:0002024	diet induced thermogenesis	Biological process	1	12	49	23276	39.585	0.0249775	1	1.60245	0.0204082	OMA1
GO:0002407	dendritic cell chemotaxis	Biological process	1	12	49	23276	39.585	0.0249775	1	1.60245	0.0204082	ANO6
GO:0006517	protein deglycosylation	Biological process	1	12	49	23276	39.585	0.0249775	1	1.60245	0.0204082	MAN2A1
GO:0043476	pigment accumulation	Biological process	1	12	49	23276	39.585	0.0249775	1	1.60245	0.0204082	AP3D1
GO:0060100	positive regulation of phagocytosis, engulfment	Biological process	1	12	49	23276	39.585	0.0249775	1	1.60245	0.0204082	ANO6
GO:0072600	establishment of protein localization to Golgi	Biological process	1	12	49	23276	39.585	0.0249775	1	1.60245	0.0204082	ATP9B
GO:1902003	regulation of beta-amyloid formation	Biological process	1	12	49	23276	39.585	0.0249775	1	1.60245	0.0204082	PICALM
GO:1990845	adaptive thermogenesis	Biological process	1	12	49	23276	39.585	0.0249775	1	1.60245	0.0204082	OMA1
GO:0051168	nuclear export	Biological process	2	117	49	23276	8.12001	0.025264	1	1.5975	0.0408163	XPO7//SETD2
GO:0016192	vesicle-mediated transport	Biological process	6	1084	49	23276	2.62926	0.0255218	1	1.59309	0.122449	STX8//ATP9A//ATP9B//PICALM//AP3D1//ANO6
GO:0030705	cytoskeleton-dependent intracellular transport	Biological process	2	119	49	23276	7.98354	0.0260697	1	1.58386	0.0408163	AP3D1//SYNE2
GO:0034728	nucleosome organization	Biological process	2	121	49	23276	7.85158	0.0268858	1	1.57048	0.0408163	KAT6B//SETD2
GO:0048284	organelle fusion	Biological process	2	121	49	23276	7.85158	0.0268858	1	1.57048	0.0408163	STX8//OMA1
GO:0034205	beta-amyloid formation	Biological process	1	13	49	23276	36.54	0.0270311	1	1.56814	0.0204082	PICALM
GO:0042407	cristae formation	Biological process	1	13	49	23276	36.54	0.0270311	1	1.56814	0.0204082	OMA1
GO:0046931	pore complex assembly	Biological process	1	13	49	23276	36.54	0.0270311	1	1.56814	0.0204082	ANO6
GO:0048261	negative regulation of receptor-mediated endocytosis	Biological process	1	13	49	23276	36.54	0.0270311	1	1.56814	0.0204082	PICALM
GO:0048268	clathrin coat assembly	Biological process	1	13	49	23276	36.54	0.0270311	1	1.56814	0.0204082	PICALM
GO:0097286	iron ion import	Biological process	1	13	49	23276	36.54	0.0270311	1	1.56814	0.0204082	PICALM
GO:0016571	histone methylation	Biological process	2	123	49	23276	7.72391	0.0277122	1	1.55733	0.0408163	NSD1//SETD2
GO:0007638	mechanosensory behavior	Biological process	1	14	49	23276	33.93	0.0290805	1	1.5364	0.0204082	STRBP
GO:0030157	pancreatic juice secretion	Biological process	1	14	49	23276	33.93	0.0290805	1	1.5364	0.0204082	STK39
GO:0090026	positive regulation of monocyte chemotaxis	Biological process	1	14	49	23276	33.93	0.0290805	1	1.5364	0.0204082	ANO6
GO:1902991	regulation of amyloid precursor protein catabolic process	Biological process	1	14	49	23276	33.93	0.0290805	1	1.5364	0.0204082	PICALM
GO:0044801	single-organism membrane fusion	Biological process	2	131	49	23276	7.25222	0.0311187	1	1.50698	0.0408163	STX8//OMA1
GO:0002475	antigen processing and presentation via MHC class Ib	Biological process	1	15	49	23276	31.668	0.0311257	1	1.50688	0.0204082	AP3D1
GO:0006346	methylation-dependent chromatin silencing	Biological process	1	15	49	23276	31.668	0.0311257	1	1.50688	0.0204082	MBD2
GO:0018027	peptidyl-lysine dimethylation	Biological process	1	15	49	23276	31.668	0.0311257	1	1.50688	0.0204082	SETD2
GO:0060099	regulation of phagocytosis, engulfment	Biological process	1	15	49	23276	31.668	0.0311257	1	1.50688	0.0204082	ANO6
GO:0060338	regulation of type I interferon-mediated signaling pathway	Biological process	1	15	49	23276	31.668	0.0311257	1	1.50688	0.0204082	UBE2K
GO:0098659	inorganic cation import into cell	Biological process	1	15	49	23276	31.668	0.0311257	1	1.50688	0.0204082	PICALM
GO:0099587	inorganic ion import into cell	Biological process	1	15	49	23276	31.668	0.0311257	1	1.50688	0.0204082	PICALM
GO:1902578	single-organism localization	Biological process	13	3602	49	23276	1.7144	0.0321368	1	1.493	0.265306	XPO7//ANO6//AP3D1//ATP9A//ATP9B//STX8//SETD2//PITPNB//CYTB//PICALM//SYNE2//STK39//SLC18B1
GO:0040023	establishment of nucleus localization	Biological process	1	16	49	23276	29.6888	0.0331667	1	1.4793	0.0204082	SYNE2
GO:0042711	maternal behavior	Biological process	1	16	49	23276	29.6888	0.0331667	1	1.4793	0.0204082	MBD2
GO:0045836	positive regulation of meiotic nuclear division	Biological process	1	16	49	23276	29.6888	0.0331667	1	1.4793	0.0204082	EIF4G3
GO:0048490	anterograde synaptic vesicle transport	Biological process	1	16	49	23276	29.6888	0.0331667	1	1.4793	0.0204082	AP3D1
GO:0060457	negative regulation of digestive system process	Biological process	1	16	49	23276	29.6888	0.0331667	1	1.4793	0.0204082	STK39
GO:0099514	synaptic vesicle cytoskeletal transport	Biological process	1	16	49	23276	29.6888	0.0331667	1	1.4793	0.0204082	AP3D1
GO:0099517	synaptic vesicle transport along microtubule	Biological process	1	16	49	23276	29.6888	0.0331667	1	1.4793	0.0204082	AP3D1
GO:1901017	negative regulation of potassium ion transmembrane transporter activity	Biological process	1	16	49	23276	29.6888	0.0331667	1	1.4793	0.0204082	STK39
GO:2000353	positive regulation of endothelial cell apoptotic process	Biological process	1	16	49	23276	29.6888	0.0331667	1	1.4793	0.0204082	ANO6
GO:0015931	nucleobase-containing compound transport	Biological process	2	137	49	23276	6.9346	0.033777	1	1.47138	0.0408163	SETD2//XPO7
GO:0016573	histone acetylation	Biological process	2	139	49	23276	6.83483	0.0346823	1	1.45989	0.0408163	YEATS2//KAT6B
GO:0006515	misfolded or incompletely synthesized protein catabolic process	Biological process	1	17	49	23276	27.9424	0.0352034	1	1.45342	0.0204082	OMA1
GO:0036336	dendritic cell migration	Biological process	1	17	49	23276	27.9424	0.0352034	1	1.45342	0.0204082	ANO6
GO:0043931	ossification involved in bone maturation	Biological process	1	17	49	23276	27.9424	0.0352034	1	1.45342	0.0204082	ANO6
GO:0060746	parental behavior	Biological process	1	17	49	23276	27.9424	0.0352034	1	1.45342	0.0204082	MBD2
GO:0051128	regulation of cellular component organization	Biological process	9	2182	49	23276	1.9593	0.0364602	1	1.43818	0.183673	NSD1//SPRR2A1//OMA1//CAMSAP1//PICALM//MYO3A//ANO6//EIF4G3//STX8
GO:0006810	transport	Biological process	14	4058	49	23276	1.63881	0.0366143	1	1.43635	0.285714	AP3D1//PICALM//STX8//XPO7//ANO6//ATP9A//ATP9B//SETD2//DENND1B//PITPNB//CYTB//SYNE2//STK39//SLC18B1
GO:0006403	RNA localization	Biological process	2	144	49	23276	6.59751	0.0369866	1	1.43196	0.0408163	SETD2//XPO7
GO:0018393	internal peptidyl-lysine acetylation	Biological process	2	144	49	23276	6.59751	0.0369866	1	1.43196	0.0408163	KAT6B//YEATS2
GO:0051649	establishment of localization in cell	Biological process	9	2190	49	23276	1.95214	0.0372031	1	1.42942	0.183673	XPO7//AP3D1//STX8//ATP9A//ATP9B//SYNE2//SETD2//PICALM//MYO5C
GO:0006884	cell volume homeostasis	Biological process	1	18	49	23276	26.39	0.037236	1	1.42904	0.0204082	ANO6
GO:0006901	vesicle coating	Biological process	1	18	49	23276	26.39	0.037236	1	1.42904	0.0204082	PICALM
GO:0070977	bone maturation	Biological process	1	18	49	23276	26.39	0.037236	1	1.42904	0.0204082	ANO6
GO:0015711	organic anion transport	Biological process	3	354	49	23276	4.0256	0.0384304	1	1.41532	0.0612245	ATP9A//ATP9B//PITPNB
GO:0061025	membrane fusion	Biological process	2	148	49	23276	6.41919	0.0388716	1	1.41037	0.0408163	STX8//OMA1
GO:0035587	purinergic receptor signaling pathway	Biological process	1	19	49	23276	25.0011	0.0392643	1	1.406	0.0204082	ANO6
GO:0051446	positive regulation of meiotic cell cycle	Biological process	1	19	49	23276	25.0011	0.0392643	1	1.406	0.0204082	EIF4G3
GO:0090025	regulation of monocyte chemotaxis	Biological process	1	19	49	23276	25.0011	0.0392643	1	1.406	0.0204082	ANO6
GO:0006475	internal protein amino acid acetylation	Biological process	2	150	49	23276	6.33361	0.0398277	1	1.39982	0.0408163	KAT6B//YEATS2
GO:0051650	establishment of vesicle localization	Biological process	2	150	49	23276	6.33361	0.0398277	1	1.39982	0.0408163	MYO5C//AP3D1
GO:0018394	peptidyl-lysine acetylation	Biological process	2	151	49	23276	6.29166	0.0403091	1	1.3946	0.0408163	KAT6B//YEATS2
GO:0071805	potassium ion transmembrane transport	Biological process	2	153	49	23276	6.20942	0.0412785	1	1.38428	0.0408163	STK39//ANO6
GO:0006298	mismatch repair	Biological process	1	20	49	23276	23.751	0.0412885	1	1.38417	0.0204082	SETD2
GO:0007007	inner mitochondrial membrane organization	Biological process	1	20	49	23276	23.751	0.0412885	1	1.38417	0.0204082	OMA1
GO:0035561	regulation of chromatin binding	Biological process	1	20	49	23276	23.751	0.0412885	1	1.38417	0.0204082	MBD2
GO:0042987	amyloid precursor protein catabolic process	Biological process	1	20	49	23276	23.751	0.0412885	1	1.38417	0.0204082	PICALM
GO:0046686	response to cadmium ion	Biological process	1	20	49	23276	23.751	0.0412885	1	1.38417	0.0204082	CYTB
GO:0046835	carbohydrate phosphorylation	Biological process	1	20	49	23276	23.751	0.0412885	1	1.38417	0.0204082	GNE
GO:0071804	cellular potassium ion transport	Biological process	2	154	49	23276	6.1691	0.0417666	1	1.37917	0.0408163	STK39//ANO6
GO:0043933	macromolecular complex subunit organization	Biological process	9	2239	49	23276	1.90942	0.0419852	1	1.3769	0.183673	NSD1//KAT6B//SETD2//MBD2//UBE2K//ANO6//TDRD3//PICALM//YEATS2
GO:0006479	protein methylation	Biological process	2	155	49	23276	6.1293	0.0422568	1	1.3741	0.0408163	NSD1//SETD2
GO:0008213	protein alkylation	Biological process	2	155	49	23276	6.1293	0.0422568	1	1.3741	0.0408163	NSD1//SETD2
GO:0006882	cellular zinc ion homeostasis	Biological process	1	21	49	23276	22.62	0.0433085	1	1.36343	0.0204082	AP3D1
GO:0034067	protein localization to Golgi apparatus	Biological process	1	21	49	23276	22.62	0.0433085	1	1.36343	0.0204082	ATP9B
GO:0051642	centrosome localization	Biological process	1	21	49	23276	22.62	0.0433085	1	1.36343	0.0204082	SYNE2
GO:0060337	type I interferon signaling pathway	Biological process	1	21	49	23276	22.62	0.0433085	1	1.36343	0.0204082	UBE2K
GO:1901380	negative regulation of potassium ion transmembrane transport	Biological process	1	21	49	23276	22.62	0.0433085	1	1.36343	0.0204082	STK39
GO:0042538	hyperosmotic salinity response	Biological process	1	22	49	23276	21.5918	0.0453243	1	1.34367	0.0204082	CYTB
GO:0048799	organ maturation	Biological process	1	22	49	23276	21.5918	0.0453243	1	1.34367	0.0204082	ANO6
GO:0055069	zinc ion homeostasis	Biological process	1	22	49	23276	21.5918	0.0453243	1	1.34367	0.0204082	AP3D1
GO:0071357	cellular response to type I interferon	Biological process	1	22	49	23276	21.5918	0.0453243	1	1.34367	0.0204082	UBE2K
GO:0051648	vesicle localization	Biological process	2	162	49	23276	5.86445	0.0457488	1	1.33962	0.0408163	MYO5C//AP3D1
GO:0051640	organelle localization	Biological process	3	383	49	23276	3.72079	0.0467045	1	1.33064	0.0612245	SYNE2//MYO5C//AP3D1
GO:0008089	anterograde axonal transport	Biological process	1	23	49	23276	20.6531	0.0473359	1	1.32481	0.0204082	AP3D1
GO:0006812	cation transport	Biological process	5	953	49	23276	2.49224	0.0492481	1	1.30761	0.102041	AP3D1//CYTB//ANO6//STK39//PICALM
GO:0002369	T cell cytokine production	Biological process	1	24	49	23276	19.7925	0.0493435	1	1.30677	0.0204082	DENND1B
GO:0006491	N-glycan processing	Biological process	1	24	49	23276	19.7925	0.0493435	1	1.30677	0.0204082	MAN2A1
GO:0008053	mitochondrial fusion	Biological process	1	24	49	23276	19.7925	0.0493435	1	1.30677	0.0204082	OMA1
GO:0030194	positive regulation of blood coagulation	Biological process	1	24	49	23276	19.7925	0.0493435	1	1.30677	0.0204082	ANO6
GO:1900048	positive regulation of hemostasis	Biological process	1	24	49	23276	19.7925	0.0493435	1	1.30677	0.0204082	ANO6
GO:1903959	regulation of anion transmembrane transport	Biological process	1	24	49	23276	19.7925	0.0493435	1	1.30677	0.0204082	ANO6
GO:0005622	intracellular	Cellular component	40	12802	47	23196	1.54205	1.32866e-05	0.00985869	4.87658	0.851064	MBD2//MAN2A1//KAT6B//ECI1//CYTB//VWA8//SYNE2//OMA1//GNE//ALG13//CAMTA1//NSD1//STRBP//YEATS2//TDRD3//SEL1L3//PARM1//PICALM//SETD2//SPECC1//UBE2K//STK39//XPO7//RNF38//DCAF8//RASA2//AP3D1//CAMSAP1//DENND1B//PITPNB//SVEP1//MYO3A//DYM//LRCH3//ARHGAP26//STX8//ATP9A//ATP9B//MYO5C//ANO6
GO:0044424	intracellular part	Cellular component	39	12670	47	23196	1.51916	4.13875e-05	0.0153548	4.38313	0.829787	CAMTA1//RASA2//AP3D1//MBD2//STRBP//TDRD3//CAMSAP1//PARM1//SYNE2//DENND1B//GNE//UBE2K//STK39//PITPNB//SVEP1//XPO7//MYO3A//DYM//LRCH3//ARHGAP26//DCAF8//CYTB//PICALM//ECI1//OMA1//NSD1//VWA8//ALG13//ATP9A//ATP9B//STX8//MAN2A1//YEATS2//SEL1L3//SETD2//SPECC1//KAT6B//RNF38//MYO5C
GO:0043226	organelle	Cellular component	37	12018	47	23196	1.51944	0.000128361	0.027113	3.89157	0.787234	PICALM//STX8//DENND1B//PARM1//ECI1//CYTB//VWA8//SYNE2//OMA1//ALG13//CAMTA1//MBD2//NSD1//STRBP//YEATS2//TDRD3//SEL1L3//SETD2//SPECC1//UBE2K//STK39//KAT6B//XPO7//RNF38//DCAF8//ATP9A//ATP9B//AP3D1//MAN2A1//PITPNB//DYM//ANO6//PDE8A//MYO5C//CAMSAP1//MYO3A//ARHGAP26
GO:0043229	intracellular organelle	Cellular component	35	10996	47	23196	1.5709	0.000146162	0.027113	3.83517	0.744681	PARM1//PICALM//DENND1B//ECI1//CYTB//VWA8//SYNE2//OMA1//ALG13//CAMTA1//MBD2//NSD1//STRBP//YEATS2//TDRD3//SEL1L3//SETD2//SPECC1//UBE2K//STK39//KAT6B//XPO7//RNF38//DCAF8//ATP9A//ATP9B//STX8//AP3D1//MAN2A1//PITPNB//DYM//CAMSAP1//MYO3A//ARHGAP26//MYO5C
GO:0032433	filopodium tip	Cellular component	2	12	47	23196	82.2553	0.000261803	0.0388516	3.58203	0.0425532	UBE2K//MYO3A
GO:0005802	trans-Golgi network	Cellular component	4	168	47	23196	11.7508	0.000371451	0.0408068	3.4301	0.0851064	AP3D1//ATP9A//ATP9B//STX8
GO:0005737	cytoplasm	Cellular component	32	9903	47	23196	1.59477	0.00038497	0.0408068	3.41457	0.680851	PICALM//DENND1B//SYNE2//MYO5C//MAN2A1//ECI1//CYTB//VWA8//OMA1//GNE//ALG13//AP3D1//STX8//ATP9A//PARM1//ATP9B//PITPNB//DYM//CAMTA1//RASA2//MBD2//STRBP//TDRD3//CAMSAP1//UBE2K//STK39//SVEP1//XPO7//MYO3A//LRCH3//ARHGAP26//DCAF8
GO:0030175	filopodium	Cellular component	3	78	47	23196	18.982	0.000533164	0.0494509	3.27314	0.0638298	SYNE2//UBE2K//MYO3A
GO:0005794	Golgi apparatus	Cellular component	9	1253	47	23196	3.54492	0.000806803	0.0665164	3.09323	0.191489	AP3D1//ATP9A//ATP9B//STX8//MAN2A1//PARM1//PICALM//PITPNB//DYM
GO:0044464	cell part	Cellular component	40	14770	47	23196	1.33658	0.00104316	0.0685571	2.98165	0.851064	ANO6//RASA2//ATP9A//PARM1//PICALM//SYNE2//ATP9B//PITPNB//STX8//CAMTA1//AP3D1//MBD2//STRBP//TDRD3//CAMSAP1//DENND1B//GNE//UBE2K//STK39//SVEP1//XPO7//MYO3A//DYM//LRCH3//ARHGAP26//DCAF8//CYTB//RNF38//ECI1//OMA1//YEATS2//NSD1//VWA8//ALG13//SEL1L3//SETD2//SPECC1//KAT6B//MAN2A1//MYO5C
GO:0005623	cell	Cellular component	40	14784	47	23196	1.33531	0.00107198	0.0685571	2.96981	0.851064	ANO6//RASA2//ATP9A//PARM1//PICALM//SYNE2//ATP9B//MBD2//MAN2A1//PITPNB//KAT6B//MYO3A//ECI1//CYTB//VWA8//OMA1//GNE//ALG13//CAMTA1//NSD1//STRBP//YEATS2//TDRD3//SEL1L3//SETD2//SPECC1//UBE2K//STK39//XPO7//RNF38//DCAF8//AP3D1//CAMSAP1//DENND1B//SVEP1//DYM//LRCH3//ARHGAP26//STX8//MYO5C
GO:0098791	Golgi subcompartment	Cellular component	4	225	47	23196	8.7739	0.00110874	0.0685571	2.95517	0.0851064	AP3D1//ATP9A//ATP9B//STX8
GO:0043231	intracellular membrane-bounded organelle	Cellular component	31	9959	47	23196	1.53625	0.0012146	0.0693255	2.91557	0.659574	ECI1//CYTB//VWA8//SYNE2//OMA1//ALG13//CAMTA1//MBD2//NSD1//STRBP//YEATS2//TDRD3//SEL1L3//PARM1//PICALM//SETD2//SPECC1//UBE2K//STK39//KAT6B//XPO7//RNF38//DCAF8//ATP9A//ATP9B//STX8//AP3D1//MAN2A1//PITPNB//DYM//MYO5C
GO:0031984	organelle subcompartment	Cellular component	4	237	47	23196	8.32965	0.00134277	0.0696586	2.872	0.0851064	AP3D1//ATP9A//ATP9B//STX8
GO:0044431	Golgi apparatus part	Cellular component	5	414	47	23196	5.96053	0.00146424	0.0696586	2.83439	0.106383	MAN2A1//AP3D1//ATP9A//ATP9B//STX8
GO:0043227	membrane-bounded organelle	Cellular component	33	11071	47	23196	1.4711	0.00150207	0.0696586	2.82331	0.702128	PARM1//ECI1//CYTB//VWA8//SYNE2//OMA1//ALG13//CAMTA1//MBD2//NSD1//STRBP//YEATS2//TDRD3//SEL1L3//PICALM//SETD2//SPECC1//UBE2K//STK39//KAT6B//XPO7//RNF38//DCAF8//ATP9A//ATP9B//STX8//AP3D1//MAN2A1//PITPNB//DYM//ANO6//PDE8A//MYO5C
GO:0005768	endosome	Cellular component	6	688	47	23196	4.30406	0.00254148	0.110928	2.59491	0.12766	ATP9A//PARM1//STX8//AP3D1//PICALM//ATP9B
GO:0098858	actin-based cell projection	Cellular component	3	172	47	23196	8.60811	0.00511394	0.210808	2.29124	0.0638298	MYO3A//SYNE2//UBE2K
GO:0016234	inclusion body	Cellular component	2	64	47	23196	15.4229	0.00747873	0.292064	2.12617	0.0425532	SYNE2//PICALM
GO:0005769	early endosome	Cellular component	3	205	47	23196	7.22242	0.00828896	0.30752	2.0815	0.0638298	ATP9A//PARM1//STX8
GO:0030117	membrane coat	Cellular component	2	85	47	23196	11.6125	0.0128918	0.418939	1.88969	0.0425532	PICALM//AP3D1
GO:0048475	coated membrane	Cellular component	2	85	47	23196	11.6125	0.0128918	0.418939	1.88969	0.0425532	AP3D1//PICALM
GO:0012505	endomembrane system	Cellular component	13	3333	47	23196	1.92497	0.012986	0.418939	1.88653	0.276596	ALG13//SYNE2//ATP9A//PARM1//PICALM//ATP9B//STX8//AP3D1//MAN2A1//PITPNB//DYM//MYO5C//XPO7
GO:0044446	intracellular organelle part	Cellular component	19	5958	47	23196	1.57387	0.0190171	0.570424	1.72086	0.404255	SYNE2//MBD2//KAT6B//XPO7//AP3D1//SEL1L3//TDRD3//OMA1//CAMSAP1//MYO3A//MAN2A1//PICALM//STX8//YEATS2//ECI1//CYTB//ATP9A//ATP9B//NSD1
GO:0055037	recycling endosome	Cellular component	2	105	47	23196	9.40061	0.0192191	0.570424	1.71627	0.0425532	ATP9A//STX8
GO:0030669	clathrin-coated endocytic vesicle membrane	Cellular component	1	10	47	23196	49.3532	0.0200822	0.573116	1.69719	0.0212766	PICALM
GO:0031090	organelle membrane	Cellular component	8	1726	47	23196	2.28752	0.0214969	0.584818	1.66762	0.170213	SYNE2//OMA1//ECI1//CYTB//MAN2A1//AP3D1//STX8//PICALM
GO:0032426	stereocilium tip	Cellular component	1	11	47	23196	44.8665	0.0220686	0.584818	1.65623	0.0212766	MYO3A
GO:0031235	intrinsic component of the cytoplasmic side of the plasma membrane	Cellular component	1	12	47	23196	41.1277	0.024051	0.611149	1.61887	0.0212766	RASA2
GO:0048471	perinuclear region of cytoplasm	Cellular component	4	556	47	23196	3.55059	0.0258591	0.611149	1.58739	0.0851064	ATP9A//PICALM//ATP9B//STX8
GO:0030132	clathrin coat of coated pit	Cellular component	1	13	47	23196	37.964	0.0260295	0.611149	1.58453	0.0212766	PICALM
GO:0044422	organelle part	Cellular component	19	6159	47	23196	1.5225	0.0266667	0.611149	1.57403	0.404255	MYO3A//SYNE2//OMA1//ECI1//CYTB//MAN2A1//AP3D1//ATP9A//ATP9B//STX8//MBD2//KAT6B//XPO7//SEL1L3//NSD1//TDRD3//CAMSAP1//YEATS2//PICALM
GO:0005640	nuclear outer membrane	Cellular component	1	14	47	23196	35.2523	0.0280041	0.611149	1.55278	0.0212766	SYNE2
GO:0005671	Ada2/Gcn5/Ada3 transcription activator complex	Cellular component	1	14	47	23196	35.2523	0.0280041	0.611149	1.55278	0.0212766	YEATS2
GO:0031527	filopodium membrane	Cellular component	1	15	47	23196	32.9021	0.0299748	0.629366	1.52324	0.0212766	SYNE2
GO:0005770	late endosome	Cellular component	2	136	47	23196	7.25782	0.0310623	0.629366	1.50777	0.0425532	STX8//PARM1
GO:0005634	nucleus	Cellular component	19	6261	47	23196	1.4977	0.0313835	0.629366	1.5033	0.404255	MBD2//SYNE2//XPO7//AP3D1//SEL1L3//YEATS2//NSD1//TDRD3//CAMTA1//STRBP//PARM1//PICALM//SETD2//SPECC1//UBE2K//STK39//KAT6B//RNF38//DCAF8
GO:0030125	clathrin vesicle coat	Cellular component	1	17	47	23196	29.0313	0.0339044	0.645052	1.46974	0.0212766	PICALM
GO:0030666	endocytic vesicle membrane	Cellular component	1	17	47	23196	29.0313	0.0339044	0.645052	1.46974	0.0212766	PICALM
GO:0031967	organelle envelope	Cellular component	5	904	47	23196	2.72971	0.0353648	0.647832	1.45143	0.106383	SYNE2//XPO7//OMA1//ECI1//CYTB
GO:0031975	envelope	Cellular component	5	907	47	23196	2.72068	0.0357966	0.647832	1.44616	0.106383	SYNE2//XPO7//OMA1//ECI1//CYTB
GO:0043234	protein complex	Cellular component	13	3826	47	23196	1.67692	0.0370445	0.653175	1.43128	0.276596	MYO3A//SYNE2//TDRD3//KAT6B//CYTB//AP3D1//STX8//MBD2//PICALM//ANO6//NSD1//DCAF8//YEATS2
GO:0010008	endosome membrane	Cellular component	2	152	47	23196	6.49384	0.0380504	0.653175	1.41964	0.0425532	STX8//AP3D1
GO:0098796	membrane protein complex	Cellular component	5	929	47	23196	2.65625	0.0390642	0.653175	1.40822	0.106383	AP3D1//STX8//PICALM//CYTB//ANO6
GO:0045334	clathrin-coated endocytic vesicle	Cellular component	1	20	47	23196	24.6766	0.0397696	0.653175	1.40045	0.0212766	PICALM
GO:0035145	exon-exon junction complex	Cellular component	1	21	47	23196	23.5015	0.0417169	0.653175	1.37969	0.0212766	TDRD3
GO:0044440	endosomal part	Cellular component	2	166	47	23196	5.94617	0.0446094	0.653175	1.35057	0.0425532	AP3D1//STX8
GO:0005743	mitochondrial inner membrane	Cellular component	3	391	47	23196	3.78669	0.0446762	0.653175	1.34992	0.0638298	ECI1//CYTB//OMA1
GO:0005765	lysosomal membrane	Cellular component	2	168	47	23196	5.87538	0.0455786	0.653175	1.34124	0.0425532	AP3D1//STX8
GO:0098852	lytic vacuole membrane	Cellular component	2	168	47	23196	5.87538	0.0455786	0.653175	1.34124	0.0425532	AP3D1//STX8
GO:0080008	Cul4-RING E3 ubiquitin ligase complex	Cellular component	1	23	47	23196	21.4579	0.0455999	0.653175	1.34104	0.0212766	DCAF8
GO:0044463	cell projection part	Cellular component	5	972	47	23196	2.53874	0.0459698	0.653175	1.33753	0.106383	MYO3A//UBE2K//PICALM//SYNE2//AP3D1
GO:1902494	catalytic complex	Cellular component	5	979	47	23196	2.52059	0.0471596	0.653175	1.32643	0.106383	MBD2//CYTB//DCAF8//NSD1//YEATS2
GO:0070069	cytochrome complex	Cellular component	1	24	47	23196	20.5638	0.0475356	0.653175	1.32298	0.0212766	CYTB
GO:0030665	clathrin-coated vesicle membrane	Cellular component	1	25	47	23196	19.7413	0.0494675	0.667362	1.30568	0.0212766	PICALM
GO:0005548	phospholipid transporter activity	Molecular function	4	47	48	22849	40.5124	2.86078e-06	0.00427973	5.54352	0.0833333	ATP9A//ATP9B//PITPNB//ANO6
GO:0005319	lipid transporter activity	Molecular function	4	98	48	22849	19.4294	5.35636e-05	0.0400656	4.27113	0.0833333	ATP9A//ATP9B//PITPNB//ANO6
GO:0004012	phospholipid-translocating ATPase activity	Molecular function	2	16	48	22849	59.5026	0.000508915	0.253779	3.29335	0.0416667	ATP9A//ATP9B
GO:0043167	ion binding	Molecular function	20	5178	48	22849	1.83863	0.00253256	0.947178	2.59644	0.416667	PICALM//PITPNB//ARHGAP26//MYO3A//RASA2//ATP9A//MAN2A1//CYTB//NSD1//PDE8A//ATP9B//GNE//KAT6B//OMA1//RNF38//SVEP1//VWA8//CDK17//UBE2K//STK39
GO:0018024	histone-lysine N-methyltransferase activity	Molecular function	2	42	48	22849	22.6677	0.0035266	1	2.45264	0.0416667	NSD1//SETD2
GO:0044877	macromolecular complex binding	Molecular function	9	1536	48	22849	2.78918	0.00422593	1	2.37408	0.1875	MBD2//NSD1//TDRD3//SVEP1//CYTB//KAT6B//SYNE2//MYO3A//CAMSAP1
GO:0042054	histone methyltransferase activity	Molecular function	2	55	48	22849	17.3098	0.00597783	1	2.22346	0.0416667	NSD1//SETD2
GO:0005524	ATP binding	Molecular function	8	1355	48	22849	2.81046	0.00678134	1	2.16868	0.166667	ATP9A//VWA8//CDK17//ATP9B//GNE//UBE2K//STK39//MYO3A
GO:0032559	adenyl ribonucleotide binding	Molecular function	8	1393	48	22849	2.73379	0.00796959	1	2.09856	0.166667	ATP9A//VWA8//CDK17//ATP9B//GNE//UBE2K//STK39//MYO3A
GO:0030554	adenyl nucleotide binding	Molecular function	8	1401	48	22849	2.71818	0.00823875	1	2.08414	0.166667	ATP9A//VWA8//CDK17//ATP9B//GNE//UBE2K//STK39//MYO3A
GO:0016887	ATPase activity	Molecular function	4	403	48	22849	4.72477	0.0100689	1	1.99702	0.0833333	MYO3A//ATP9A//ATP9B//VWA8
GO:0043168	anion binding	Molecular function	11	2491	48	22849	2.10206	0.0126307	1	1.89857	0.229167	PICALM//PITPNB//ARHGAP26//MYO3A//ATP9A//VWA8//CDK17//ATP9B//GNE//UBE2K//STK39
GO:0016740	transferase activity	Molecular function	10	2167	48	22849	2.19668	0.0132192	1	1.87879	0.208333	KAT6B//ALG13//NSD1//SETD2//CDK17//GNE//STK39//MYO3A//UBE2K//RNF38
GO:0022892	substrate-specific transporter activity	Molecular function	6	996	48	22849	2.8676	0.0174072	1	1.75927	0.125	XPO7//ATP9A//ATP9B//PITPNB//ANO6//CYTB
GO:0003682	chromatin binding	Molecular function	4	487	48	22849	3.90982	0.0189501	1	1.72239	0.0833333	MBD2//NSD1//TDRD3//SVEP1
GO:0032403	protein complex binding	Molecular function	6	1016	48	22849	2.81115	0.0190108	1	1.721	0.125	SYNE2//MYO3A//CAMSAP1//MBD2//CYTB//KAT6B
GO:0035639	purine ribonucleoside triphosphate binding	Molecular function	8	1662	48	22849	2.29132	0.0214049	1	1.66949	0.166667	ATP9A//VWA8//CDK17//ATP9B//GNE//UBE2K//STK39//MYO3A
GO:0032550	purine ribonucleoside binding	Molecular function	8	1676	48	22849	2.27218	0.0223894	1	1.64996	0.166667	ATP9A//VWA8//CDK17//ATP9B//GNE//UBE2K//STK39//MYO3A
GO:0032549	ribonucleoside binding	Molecular function	8	1678	48	22849	2.26947	0.0225327	1	1.64719	0.166667	ATP9A//VWA8//CDK17//ATP9B//GNE//UBE2K//STK39//MYO3A
GO:0001883	purine nucleoside binding	Molecular function	8	1679	48	22849	2.26812	0.0226046	1	1.6458	0.166667	ATP9A//VWA8//CDK17//ATP9B//GNE//UBE2K//STK39//MYO3A
GO:0005229	intracellular calcium activated chloride channel activity	Molecular function	1	11	48	22849	43.2746	0.022872	1	1.6407	0.0208333	ANO6
GO:0005247	voltage-gated chloride channel activity	Molecular function	1	11	48	22849	43.2746	0.022872	1	1.6407	0.0208333	ANO6
GO:0017128	phospholipid scramblase activity	Molecular function	1	11	48	22849	43.2746	0.022872	1	1.6407	0.0208333	ANO6
GO:0030898	actin-dependent ATPase activity	Molecular function	1	11	48	22849	43.2746	0.022872	1	1.6407	0.0208333	MYO3A
GO:0034450	ubiquitin-ubiquitin ligase activity	Molecular function	1	11	48	22849	43.2746	0.022872	1	1.6407	0.0208333	UBE2K
GO:0001882	nucleoside binding	Molecular function	8	1686	48	22849	2.2587	0.0231123	1	1.63616	0.166667	ATP9A//VWA8//CDK17//ATP9B//GNE//UBE2K//STK39//MYO3A
GO:0005488	binding	Molecular function	33	12258	48	22849	1.2815	0.0240833	1	1.61828	0.6875	MBD2//NSD1//EIF4G3//STK39//XPO7//ARHGAP26//MAN2A1//PITPNB//STX8//CAMSAP1//MYO3A//ANO6//ECI1//PICALM//DYM//CYTB//KAT6B//ATP9A//VWA8//CDK17//ATP9B//GNE//UBE2K//TDRD3//SVEP1//SYNE2//YEATS2//CAMTA1//STRBP//RASA2//PDE8A//OMA1//RNF38
GO:0003824	catalytic activity	Molecular function	18	5456	48	22849	1.57045	0.0241464	1	1.61715	0.375	CYTB//NSD1//SETD2//CDK17//GNE//UBE2K//STK39//KAT6B//MYO3A//ALG13//ATP9A//MAN2A1//PDE8A//ATP9B//OMA1//ECI1//RNF38//VWA8
GO:0032555	purine ribonucleotide binding	Molecular function	8	1709	48	22849	2.2283	0.0248382	1	1.60488	0.166667	ATP9A//VWA8//CDK17//ATP9B//GNE//UBE2K//STK39//MYO3A
GO:0051015	actin filament binding	Molecular function	2	118	48	22849	8.06815	0.0255583	1	1.59247	0.0416667	SYNE2//MYO3A
GO:0017076	purine nucleotide binding	Molecular function	8	1719	48	22849	2.21534	0.0256166	1	1.59148	0.166667	ATP9A//VWA8//CDK17//ATP9B//GNE//UBE2K//STK39//MYO3A
GO:0043492	ATPase activity, coupled to movement of substances	Molecular function	2	119	48	22849	8.00035	0.0259609	1	1.58568	0.0416667	ATP9A//ATP9B
GO:0032553	ribonucleotide binding	Molecular function	8	1724	48	22849	2.20891	0.0260122	1	1.58482	0.166667	ATP9A//VWA8//CDK17//ATP9B//GNE//UBE2K//STK39//MYO3A
GO:0042623	ATPase activity, coupled	Molecular function	3	306	48	22849	4.66687	0.0264099	1	1.57823	0.0625	MYO3A//ATP9A//ATP9B
GO:0016278	lysine N-methyltransferase activity	Molecular function	2	121	48	22849	7.86811	0.0267738	1	1.57229	0.0416667	NSD1//SETD2
GO:0016279	protein-lysine N-methyltransferase activity	Molecular function	2	121	48	22849	7.86811	0.0267738	1	1.57229	0.0416667	NSD1//SETD2
GO:0016854	racemase and epimerase activity	Molecular function	1	13	48	22849	36.617	0.0269751	1	1.56904	0.0208333	GNE
GO:0070742	C2H2 zinc finger domain binding	Molecular function	1	13	48	22849	36.617	0.0269751	1	1.56904	0.0208333	MBD2
GO:0000146	microfilament motor activity	Molecular function	1	15	48	22849	31.7347	0.0310614	1	1.50778	0.0208333	MYO3A
GO:0005545	1-phosphatidylinositol binding	Molecular function	1	15	48	22849	31.7347	0.0310614	1	1.50778	0.0208333	PICALM
GO:0016863	intramolecular oxidoreductase activity, transposing C=C bonds	Molecular function	1	15	48	22849	31.7347	0.0310614	1	1.50778	0.0208333	ECI1
GO:0000166	nucleotide binding	Molecular function	9	2139	48	22849	2.00289	0.0321048	1	1.49343	0.1875	MBD2//ATP9A//VWA8//CDK17//ATP9B//GNE//UBE2K//STK39//MYO3A
GO:1901265	nucleoside phosphate binding	Molecular function	9	2139	48	22849	2.00289	0.0321048	1	1.49343	0.1875	ATP9A//VWA8//CDK17//ATP9B//GNE//UBE2K//STK39//MYO3A//MBD2
GO:0005543	phospholipid binding	Molecular function	3	331	48	22849	4.31439	0.0322641	1	1.49128	0.0625	PICALM//PITPNB//ARHGAP26
GO:0005215	transporter activity	Molecular function	6	1153	48	22849	2.47712	0.0328001	1	1.48413	0.125	XPO7//ATP9A//ATP9B//PITPNB//ANO6//CYTB
GO:0008308	voltage-gated anion channel activity	Molecular function	1	16	48	22849	29.7513	0.0330982	1	1.48019	0.0208333	ANO6
GO:0017081	chloride channel regulator activity	Molecular function	1	16	48	22849	29.7513	0.0330982	1	1.48019	0.0208333	STX8
GO:0008170	N-methyltransferase activity	Molecular function	2	136	48	22849	7.00031	0.0331909	1	1.47898	0.0416667	NSD1//SETD2
GO:0008276	protein methyltransferase activity	Molecular function	2	139	48	22849	6.84922	0.0345401	1	1.46168	0.0416667	NSD1//SETD2
GO:0016853	isomerase activity	Molecular function	2	139	48	22849	6.84922	0.0345401	1	1.46168	0.0416667	GNE//ECI1
GO:0008327	methyl-CpG binding	Molecular function	1	17	48	22849	28.0012	0.0351309	1	1.45431	0.0208333	MBD2
GO:0005487	nucleocytoplasmic transporter activity	Molecular function	1	18	48	22849	26.4456	0.0371593	1	1.42993	0.0208333	XPO7
GO:0046872	metal ion binding	Molecular function	12	3317	48	22849	1.72211	0.0383013	1	1.41679	0.25	ATP9A//ATP9B//SVEP1//MAN2A1//NSD1//KAT6B//RNF38//RASA2//CYTB//PDE8A//GNE//OMA1
GO:0004115	3',5'-cyclic-AMP phosphodiesterase activity	Molecular function	1	19	48	22849	25.0537	0.0391836	1	1.4069	0.0208333	PDE8A
GO:0017025	TBP-class protein binding	Molecular function	1	20	48	22849	23.801	0.0412037	1	1.38506	0.0208333	YEATS2
GO:0046965	retinoid X receptor binding	Molecular function	1	21	48	22849	22.6677	0.0432197	1	1.36432	0.0208333	NSD1
GO:0043169	cation binding	Molecular function	12	3407	48	22849	1.67662	0.0457752	1	1.33937	0.25	RASA2//ATP9A//MAN2A1//CYTB//NSD1//PDE8A//ATP9B//GNE//KAT6B//OMA1//RNF38//SVEP1
GO:0005516	calmodulin binding	Molecular function	2	169	48	22849	5.63338	0.0491471	1	1.3085	0.0416667	CAMSAP1//MYO3A
GO:0046966	thyroid hormone receptor binding	Molecular function	1	24	48	22849	19.8342	0.0492427	1	1.30766	0.0208333	NSD1

## Sheet: down DSS+5-ASA vs DSS
#Column "GO.ID" stands for the ID of gene ontology term
#Column "Term" stands for the name of gene ontology term
#Column "Ontology" stands for the ontology of GOID belongs to
#Column "Count" stands for the number of DE genes associated with the listed GOID
#Column "Pop.Hits" stands for the number of background population genes associated with the listed GOID
#Column "List.Total" stands for the total number of DE genes
#Column "Pop.Total" stands for the total number of background population genes
#Column "Fold.Enrichment" stands for the Fold Enrichment value of the GOID, it equals (Count/Pop.Hits)/(List.Total/Pop.Total)
#Column "Pvalue" stands for the significance testing value of the GOID
#Column "FDR" stands for the false discovery rate of the GOID, using Benjamini & Hochberg (1995) method
#Column "Enrichment.Score" stands for the Enrichment Score value of the GOID, it equals (-log10(Pvalue))
#Column "Gene.Ratio" stands for the Gene Ratio value genes associated with the GOID, it equals (Count/List.Total)
#Column "GENES" stands for the DE genes associated with the GOID
GO.ID	Term	Ontology	Count	Pop.Hits	List.Total	Pop.Total	Fold.Enrichment	Pvalue	FDR	Enrichment.Score	Gene.Ratio	GENES
GO:0006996	organelle organization	Biological process	16	3262	43	23276	2.65507	0.000130845	0.47496	3.88324	0.372093	SMC3//DAAM1//ARHGAP10//EEA1//KMT2D//CASC5//MARF1//BBS9//SNX5//KMT2C//NCKAP1//STAU2//MYOCD//CEP85//TBC1D5//TBC1D14
GO:0042147	retrograde transport, endosome to Golgi	Biological process	3	58	43	23276	27.9984	0.000168813	0.47496	3.77259	0.0697674	TBC1D14//SNX5//TBC1D5
GO:1902589	single-organism organelle organization	Biological process	13	2387	43	23276	2.94802	0.000255141	0.47496	3.59322	0.302326	DAAM1//EEA1//SMC3//CASC5//MARF1//BBS9//KMT2C//NCKAP1//STAU2//MYOCD//CEP85//KMT2D//TBC1D5
GO:0010923	negative regulation of phosphatase activity	Biological process	3	73	43	23276	22.2453	0.000333774	0.47496	3.47655	0.0697674	ZFYVE1//MARF1//CASC5
GO:0035308	negative regulation of protein dephosphorylation	Biological process	3	79	43	23276	20.5558	0.000421118	0.47496	3.3756	0.0697674	ZFYVE1//MARF1//CASC5
GO:0035305	negative regulation of dephosphorylation	Biological process	3	82	43	23276	19.8037	0.000469793	0.47496	3.32809	0.0697674	ZFYVE1//MARF1//CASC5
GO:0031324	negative regulation of cellular metabolic process	Biological process	12	2287	43	23276	2.84024	0.000663235	0.494452	3.17833	0.27907	MYOCD//STRN3//KMT2D//CEP85//TBC1D14//ZFYVE1//MARF1//CASC5//EIF4E//SMC3//MID2//CCAR1
GO:0003298	physiological muscle hypertrophy	Biological process	2	24	43	23276	45.1085	0.000896633	0.494452	3.04739	0.0465116	MYOCD//PDLIM5
GO:0003301	physiological cardiac muscle hypertrophy	Biological process	2	24	43	23276	45.1085	0.000896633	0.494452	3.04739	0.0465116	MYOCD//PDLIM5
GO:0035418	protein localization to synapse	Biological process	2	24	43	23276	45.1085	0.000896633	0.494452	3.04739	0.0465116	CEP112//HOMER1
GO:0061049	cell growth involved in cardiac muscle cell development	Biological process	2	24	43	23276	45.1085	0.000896633	0.494452	3.04739	0.0465116	MYOCD//PDLIM5
GO:0007049	cell cycle	Biological process	9	1438	43	23276	3.38784	0.00106598	0.538854	2.97225	0.209302	EIF4E//ANP32B//PPM1D//SMC3//CASC5//MARF1//MYOCD//CEP85//CCAR1
GO:0010921	regulation of phosphatase activity	Biological process	3	114	43	23276	14.2448	0.00122429	0.567483	2.91212	0.0697674	ZFYVE1//MARF1//CASC5
GO:1903047	mitotic cell cycle process	Biological process	6	668	43	23276	4.862	0.00134837	0.567483	2.87019	0.139535	EIF4E//ANP32B//PPM1D//SMC3//CASC5//CEP85
GO:0033146	regulation of intracellular estrogen receptor signaling pathway	Biological process	2	30	43	23276	36.0868	0.00140327	0.567483	2.85286	0.0465116	STRN3//KMT2D
GO:0061001	regulation of dendritic spine morphogenesis	Biological process	2	32	43	23276	33.8314	0.00159631	0.579113	2.79688	0.0465116	STAU2//PDLIM5
GO:0009892	negative regulation of metabolic process	Biological process	12	2546	43	23276	2.55131	0.00170953	0.579113	2.76712	0.27907	MYOCD//STRN3//KMT2D//CEP85//TBC1D14//ZFYVE1//MARF1//CASC5//EIF4E//SMC3//MID2//CCAR1
GO:0006470	protein dephosphorylation	Biological process	4	286	43	23276	7.57066	0.00188955	0.579113	2.72364	0.0930233	ZFYVE1//MARF1//CASC5//PPM1D
GO:0008104	protein localization	Biological process	11	2222	43	23276	2.67971	0.00188968	0.579113	2.72361	0.255814	SNX5//AFTPH//BBS9//DENND1B//VPS13B//TBC1D5//NCKAP1//CASC5//MID2//HOMER1//CEP112
GO:0048523	negative regulation of cellular process	Biological process	16	4140	43	23276	2.09199	0.00198591	0.579113	2.70204	0.372093	MYOCD//STRN3//KMT2D//CEP85//APBB3//ANP32B//ARHGAP10//TBC1D14//ZFYVE1//MARF1//CASC5//EIF4E//SMC3//MID2//STAU2//CCAR1
GO:0019222	regulation of metabolic process	Biological process	20	5882	43	23276	1.84054	0.00204714	0.579113	2.68885	0.465116	MYOCD//STRN3//TBC1D5//SMC3//KMT2D//ZZZ3//APBB3//KMT2C//CCAR1//EIF4E//CEP85//MARF1//STAU2//FUT8//TC2N//TBC1D14//MID2//ZFYVE1//CASC5//DENND1B
GO:0035304	regulation of protein dephosphorylation	Biological process	3	138	43	23276	11.7674	0.00211575	0.579113	2.67453	0.0697674	ZFYVE1//MARF1//CASC5
GO:0030520	intracellular estrogen receptor signaling pathway	Biological process	2	39	43	23276	27.7591	0.00236535	0.579113	2.62611	0.0465116	STRN3//KMT2D
GO:0035303	regulation of dephosphorylation	Biological process	3	144	43	23276	11.2771	0.00238769	0.579113	2.62202	0.0697674	ZFYVE1//MARF1//CASC5
GO:0010605	negative regulation of macromolecule metabolic process	Biological process	11	2312	43	23276	2.5754	0.00259355	0.579113	2.58611	0.255814	MYOCD//STRN3//KMT2D//CEP85//ZFYVE1//MARF1//CASC5//EIF4E//SMC3//MID2//CCAR1
GO:0055002	striated muscle cell development	Biological process	3	150	43	23276	10.826	0.00268037	0.579113	2.57181	0.0697674	HOMER1//MYOCD//PDLIM5
GO:0022402	cell cycle process	Biological process	7	1037	43	23276	3.65392	0.00270076	0.579113	2.56851	0.162791	EIF4E//ANP32B//PPM1D//SMC3//CASC5//MARF1//CEP85
GO:0006479	protein methylation	Biological process	3	155	43	23276	10.4768	0.0029405	0.579113	2.53158	0.0697674	KMT2C//KMT2D//GSPT1
GO:0008213	protein alkylation	Biological process	3	155	43	23276	10.4768	0.0029405	0.579113	2.53158	0.0697674	GSPT1//KMT2C//KMT2D
GO:0060997	dendritic spine morphogenesis	Biological process	2	44	43	23276	24.6047	0.00300211	0.579113	2.52257	0.0465116	PDLIM5//STAU2
GO:0044699	single-organism process	Biological process	34	13487	43	23276	1.36459	0.00302269	0.579113	2.51961	0.790698	CEP85//CASC5//EIF4E//ANP32B//PPM1D//KMT2D//MYOCD//NCKAP1//TBC1D5//GSPT1//HOMER1//DAAM1//CCAR1//SMC3//ARHGAP10//KMT2C//EEA1//LBR//MARF1//FUT8//MICU2//RALGPS2//APBB3//BBS9//DENND1B//TC2N//MUC13//STAU2//STRN3//SNX5//MID2//ERAP1//PDLIM5//TBC1D14
GO:0000278	mitotic cell cycle	Biological process	6	786	43	23276	4.13208	0.003055	0.579113	2.51499	0.139535	EIF4E//ANP32B//PPM1D//SMC3//CASC5//CEP85
GO:0010563	negative regulation of phosphorus metabolic process	Biological process	5	548	43	23276	4.93889	0.00326864	0.583163	2.48563	0.116279	CEP85//ZFYVE1//MARF1//CASC5//MYOCD
GO:0045936	negative regulation of phosphate metabolic process	Biological process	5	548	43	23276	4.93889	0.00326864	0.583163	2.48563	0.116279	CEP85//ZFYVE1//MARF1//CASC5//MYOCD
GO:0055001	muscle cell development	Biological process	3	165	43	23276	9.84186	0.00350622	0.607677	2.45516	0.0697674	HOMER1//MYOCD//PDLIM5
GO:0051568	histone H3-K4 methylation	Biological process	2	49	43	23276	22.094	0.00371026	0.613284	2.4306	0.0465116	KMT2C//KMT2D
GO:0060255	regulation of macromolecule metabolic process	Biological process	18	5262	43	23276	1.85166	0.00374077	0.613284	2.42704	0.418605	MYOCD//STRN3//TBC1D5//SMC3//KMT2D//ZZZ3//APBB3//KMT2C//CCAR1//EIF4E//CEP85//MARF1//STAU2//FUT8//TC2N//ZFYVE1//CASC5//MID2
GO:0031400	negative regulation of protein modification process	Biological process	5	583	43	23276	4.64239	0.00425271	0.661498	2.37133	0.116279	CEP85//ZFYVE1//MARF1//CASC5//MYOCD
GO:0097061	dendritic spine organization	Biological process	2	53	43	23276	20.4265	0.0043273	0.661498	2.36378	0.0465116	PDLIM5//STAU2
GO:0016043	cellular component organization	Biological process	18	5340	43	23276	1.82461	0.00442157	0.661498	2.35442	0.418605	SMC3//MYOCD//TBC1D5//GSPT1//DAAM1//ARHGAP10//EEA1//KMT2D//CASC5//MARF1//BBS9//NCKAP1//SNX5//KMT2C//STAU2//CEP85//PDLIM5//TBC1D14
GO:0016311	dephosphorylation	Biological process	4	364	43	23276	5.94838	0.00448925	0.661498	2.34783	0.0930233	PPM1D//ZFYVE1//MARF1//CASC5
GO:0048519	negative regulation of biological process	Biological process	16	4483	43	23276	1.93193	0.0045801	0.661498	2.33912	0.372093	MYOCD//STRN3//KMT2D//CEP85//APBB3//ANP32B//ARHGAP10//TBC1D14//ZFYVE1//MARF1//CASC5//EIF4E//SMC3//MID2//STAU2//CCAR1
GO:0033036	macromolecule localization	Biological process	11	2518	43	23276	2.3647	0.00503111	0.695863	2.29834	0.255814	SNX5//AFTPH//BBS9//DENND1B//VPS13B//TBC1D5//NCKAP1//CASC5//MID2//HOMER1//CEP112
GO:0010506	regulation of autophagy	Biological process	3	188	43	23276	8.6378	0.00504747	0.695863	2.29693	0.0697674	TBC1D14//MID2//TBC1D5
GO:0060998	regulation of dendritic spine development	Biological process	2	62	43	23276	17.4614	0.00587618	0.779034	2.2309	0.0465116	PDLIM5//STAU2
GO:0071840	cellular component organization or biogenesis	Biological process	18	5480	43	23276	1.778	0.00590761	0.779034	2.22859	0.418605	SMC3//MYOCD//TBC1D5//GSPT1//DAAM1//ARHGAP10//EEA1//KMT2D//CASC5//MARF1//BBS9//NCKAP1//SNX5//KMT2C//STAU2//CEP85//PDLIM5//TBC1D14
GO:0016197	endosomal transport	Biological process	3	207	43	23276	7.84496	0.00658603	0.821317	2.18138	0.0697674	SNX5//TBC1D5//TBC1D14
GO:0048588	developmental cell growth	Biological process	3	207	43	23276	7.84496	0.00658603	0.821317	2.18138	0.0697674	KMT2D//MYOCD//PDLIM5
GO:0033143	regulation of intracellular steroid hormone receptor signaling pathway	Biological process	2	66	43	23276	16.4031	0.00663444	0.821317	2.1782	0.0465116	STRN3//KMT2D
GO:0055013	cardiac muscle cell development	Biological process	2	67	43	23276	16.1583	0.00683061	0.828689	2.16554	0.0465116	MYOCD//PDLIM5
GO:0065007	biological regulation	Biological process	29	11102	43	23276	1.41396	0.00706317	0.840102	2.151	0.674419	MYOCD//STRN3//TBC1D5//SMC3//ARHGAP10//KMT2C//KMT2D//ZZZ3//APBB3//CCAR1//EIF4E//CEP85//FUT8//HOMER1//RALGPS2//ANP32B//ERAP1//MARF1//STAU2//TC2N//TBC1D14//MID2//NCKAP1//ZFYVE1//CASC5//DENND1B//MUC13//MICU2//PDLIM5
GO:0003300	cardiac muscle hypertrophy	Biological process	2	71	43	23276	15.248	0.00764137	0.874577	2.11683	0.0465116	MYOCD//PDLIM5
GO:0055006	cardiac cell development	Biological process	2	71	43	23276	15.248	0.00764137	0.874577	2.11683	0.0465116	MYOCD//PDLIM5
GO:0014897	striated muscle hypertrophy	Biological process	2	74	43	23276	14.6298	0.00827658	0.903881	2.08215	0.0465116	MYOCD//PDLIM5
GO:0043086	negative regulation of catalytic activity	Biological process	5	688	43	23276	3.93388	0.00846454	0.903881	2.0724	0.116279	CEP85//ZFYVE1//MARF1//CASC5//MYOCD
GO:0010508	positive regulation of autophagy	Biological process	2	75	43	23276	14.4347	0.00849344	0.903881	2.07092	0.0465116	MID2//TBC1D5
GO:0055017	cardiac muscle tissue growth	Biological process	2	75	43	23276	14.4347	0.00849344	0.903881	2.07092	0.0465116	MYOCD//PDLIM5
GO:0014896	muscle hypertrophy	Biological process	2	76	43	23276	14.2448	0.00871283	0.911242	2.05984	0.0465116	MYOCD//PDLIM5
GO:0051179	localization	Biological process	17	5263	43	23276	1.74846	0.00939034	0.965454	2.02732	0.395349	TBC1D5//EEA1//AFTPH//STAU2//BBS9//DENND1B//VPS13B//SNX5//MICU2//NCKAP1//FUT8//CCAR1//CASC5//MID2//HOMER1//TBC1D14//CEP112
GO:0043414	macromolecule methylation	Biological process	3	238	43	23276	6.82314	0.00964087	0.969726	2.01588	0.0697674	GSPT1//KMT2C//KMT2D
GO:0032269	negative regulation of cellular protein metabolic process	Biological process	6	1001	43	23276	3.24457	0.00975162	0.969726	2.01092	0.139535	CEP85//ZFYVE1//MARF1//CASC5//EIF4E//MYOCD
GO:0048477	oogenesis	Biological process	2	82	43	23276	13.2025	0.010082	0.986415	1.99645	0.0465116	KMT2D//MARF1
GO:0060419	heart growth	Biological process	2	84	43	23276	12.8882	0.0105584	1	1.9764	0.0465116	MYOCD//PDLIM5
GO:0051963	regulation of synapse assembly	Biological process	2	85	43	23276	12.7365	0.0108002	1	1.96657	0.0465116	STAU2//PDLIM5
GO:0060996	dendritic spine development	Biological process	2	85	43	23276	12.7365	0.0108002	1	1.96657	0.0465116	PDLIM5//STAU2
GO:0048814	regulation of dendrite morphogenesis	Biological process	2	87	43	23276	12.4437	0.0112912	1	1.94726	0.0465116	PDLIM5//STAU2
GO:0051146	striated muscle cell differentiation	Biological process	3	262	43	23276	6.19812	0.0124892	1	1.90346	0.0697674	MYOCD//HOMER1//PDLIM5
GO:0007059	chromosome segregation	Biological process	3	265	43	23276	6.12795	0.0128757	1	1.89023	0.0697674	SMC3//CASC5//CEP85
GO:0051248	negative regulation of protein metabolic process	Biological process	6	1066	43	23276	3.04673	0.0130255	1	1.88521	0.139535	CEP85//ZFYVE1//MARF1//CASC5//EIF4E//MYOCD
GO:0034968	histone lysine methylation	Biological process	2	96	43	23276	11.2771	0.0136199	1	1.86583	0.0465116	KMT2C//KMT2D
GO:0010558	negative regulation of macromolecule biosynthetic process	Biological process	7	1415	43	23276	2.67782	0.0142282	1	1.84685	0.162791	MYOCD//STRN3//KMT2D//EIF4E//SMC3//MID2//CCAR1
GO:0030518	intracellular steroid hormone receptor signaling pathway	Biological process	2	100	43	23276	10.826	0.0147162	1	1.83221	0.0465116	STRN3//KMT2D
GO:0000280	nuclear division	Biological process	4	520	43	23276	4.16386	0.0152782	1	1.81593	0.0930233	SMC3//CASC5//MARF1//CEP85
GO:0018022	peptidyl-lysine methylation	Biological process	2	104	43	23276	10.4097	0.0158494	1	1.79999	0.0465116	KMT2C//KMT2D
GO:0010468	regulation of gene expression	Biological process	13	3783	43	23276	1.86015	0.0161736	1	1.79119	0.302326	MYOCD//STRN3//KMT2D//ZZZ3//APBB3//KMT2C//CCAR1//EIF4E//MID2//MARF1//STAU2//FUT8//TC2N
GO:0014902	myotube differentiation	Biological process	2	108	43	23276	10.0241	0.0170189	1	1.76907	0.0465116	MYOCD//HOMER1
GO:0031327	negative regulation of cellular biosynthetic process	Biological process	7	1467	43	23276	2.5829	0.0170623	1	1.76796	0.162791	MYOCD//STRN3//KMT2D//EIF4E//SMC3//MID2//CCAR1
GO:0044772	mitotic cell cycle phase transition	Biological process	3	295	43	23276	5.50477	0.0171183	1	1.76654	0.0697674	EIF4E//ANP32B//PPM1D
GO:0055007	cardiac muscle cell differentiation	Biological process	2	109	43	23276	9.93215	0.0173169	1	1.76153	0.0465116	MYOCD//PDLIM5
GO:0008284	positive regulation of cell proliferation	Biological process	5	825	43	23276	3.28062	0.0174778	1	1.75751	0.116279	KMT2C//MYOCD//KMT2D//CCAR1//ANP32B
GO:0007292	female gamete generation	Biological process	2	110	43	23276	9.84186	0.0176172	1	1.75406	0.0465116	KMT2D//MARF1
GO:0050789	regulation of biological process	Biological process	27	10638	43	23276	1.37386	0.0179965	1	1.74481	0.627907	MYOCD//STRN3//TBC1D5//SMC3//ARHGAP10//KMT2C//KMT2D//ZZZ3//APBB3//CCAR1//EIF4E//CEP85//FUT8//HOMER1//RALGPS2//ANP32B//MARF1//STAU2//TC2N//TBC1D14//MID2//NCKAP1//ZFYVE1//CASC5//DENND1B//ERAP1//PDLIM5
GO:0018205	peptidyl-lysine modification	Biological process	3	301	43	23276	5.39504	0.0180501	1	1.74352	0.0697674	MYOCD//KMT2C//KMT2D
GO:0043627	response to estrogen	Biological process	2	112	43	23276	9.66611	0.0182243	1	1.73935	0.0465116	STRN3//KMT2D
GO:0051726	regulation of cell cycle	Biological process	5	834	43	23276	3.24522	0.0182316	1	1.73918	0.116279	SMC3//MYOCD//EIF4E//CEP85//ANP32B
GO:0035745	T-helper 2 cell cytokine production	Biological process	1	10	43	23276	54.1302	0.0183247	1	1.73696	0.0232558	DENND1B
GO:0045176	apical protein localization	Biological process	1	10	43	23276	54.1302	0.0183247	1	1.73696	0.0232558	NCKAP1
GO:0051152	positive regulation of smooth muscle cell differentiation	Biological process	1	10	43	23276	54.1302	0.0183247	1	1.73696	0.0232558	MYOCD
GO:0060379	cardiac muscle cell myoblast differentiation	Biological process	1	10	43	23276	54.1302	0.0183247	1	1.73696	0.0232558	MYOCD
GO:0009890	negative regulation of biosynthetic process	Biological process	7	1496	43	23276	2.53283	0.0188082	1	1.72565	0.162791	MYOCD//STRN3//KMT2D//EIF4E//SMC3//MID2//CCAR1
GO:0051172	negative regulation of nitrogen compound metabolic process	Biological process	7	1510	43	23276	2.50935	0.0196951	1	1.70564	0.162791	MYOCD//STRN3//KMT2D//EIF4E//SMC3//MID2//CCAR1
GO:0048285	organelle fission	Biological process	4	562	43	23276	3.85269	0.0197362	1	1.70474	0.0930233	SMC3//CASC5//MARF1//CEP85
GO:0044770	cell cycle phase transition	Biological process	3	313	43	23276	5.1882	0.0199974	1	1.69903	0.0697674	EIF4E//ANP32B//PPM1D
GO:0006851	mitochondrial calcium ion transport	Biological process	1	11	43	23276	49.2093	0.020139	1	1.69596	0.0232558	MICU2
GO:0007351	tripartite regional subdivision	Biological process	1	11	43	23276	49.2093	0.020139	1	1.69596	0.0232558	NCKAP1
GO:0008595	anterior/posterior axis specification, embryo	Biological process	1	11	43	23276	49.2093	0.020139	1	1.69596	0.0232558	NCKAP1
GO:0033147	negative regulation of intracellular estrogen receptor signaling pathway	Biological process	1	11	43	23276	49.2093	0.020139	1	1.69596	0.0232558	STRN3
GO:0033148	positive regulation of intracellular estrogen receptor signaling pathway	Biological process	1	11	43	23276	49.2093	0.020139	1	1.69596	0.0232558	KMT2D
GO:0034501	protein localization to kinetochore	Biological process	1	11	43	23276	49.2093	0.020139	1	1.69596	0.0232558	CASC5
GO:0035743	CD4-positive, alpha-beta T cell cytokine production	Biological process	1	11	43	23276	49.2093	0.020139	1	1.69596	0.0232558	DENND1B
GO:0048617	embryonic foregut morphogenesis	Biological process	1	11	43	23276	49.2093	0.020139	1	1.69596	0.0232558	NCKAP1
GO:0072537	fibroblast activation	Biological process	1	11	43	23276	49.2093	0.020139	1	1.69596	0.0232558	MYOCD
GO:0097120	receptor localization to synapse	Biological process	1	11	43	23276	49.2093	0.020139	1	1.69596	0.0232558	CEP112
GO:0032259	methylation	Biological process	3	315	43	23276	5.15526	0.0203329	1	1.6918	0.0697674	GSPT1//KMT2C//KMT2D
GO:0048565	digestive tract development	Biological process	2	119	43	23276	9.09752	0.020418	1	1.68999	0.0465116	NCKAP1//MYOCD
GO:0007416	synapse assembly	Biological process	2	120	43	23276	9.02171	0.02074	1	1.68319	0.0465116	PDLIM5//STAU2
GO:0031323	regulation of cellular metabolic process	Biological process	16	5256	43	23276	1.6478	0.0213088	1	1.67144	0.372093	MYOCD//STRN3//TBC1D5//SMC3//KMT2D//ZZZ3//APBB3//KMT2C//CCAR1//EIF4E//CEP85//TBC1D14//MID2//ZFYVE1//MARF1//CASC5
GO:0050807	regulation of synapse organization	Biological process	2	122	43	23276	8.87381	0.0213905	1	1.66978	0.0465116	PDLIM5//STAU2
GO:0016571	histone methylation	Biological process	2	123	43	23276	8.80166	0.0217189	1	1.66316	0.0465116	KMT2C//KMT2D
GO:0006415	translational termination	Biological process	1	12	43	23276	45.1085	0.02195	1	1.65857	0.0232558	GSPT1
GO:0007440	foregut morphogenesis	Biological process	1	12	43	23276	45.1085	0.02195	1	1.65857	0.0232558	NCKAP1
GO:0048570	notochord morphogenesis	Biological process	1	12	43	23276	45.1085	0.02195	1	1.65857	0.0232558	NCKAP1
GO:0003012	muscle system process	Biological process	3	330	43	23276	4.92093	0.0229483	1	1.63925	0.0697674	HOMER1//MYOCD//PDLIM5
GO:0002115	store-operated calcium entry	Biological process	1	13	43	23276	41.6386	0.0237578	1	1.62419	0.0232558	HOMER1
GO:0007216	G-protein coupled glutamate receptor signaling pathway	Biological process	1	13	43	23276	41.6386	0.0237578	1	1.62419	0.0232558	HOMER1
GO:0019885	antigen processing and presentation of endogenous peptide antigen via MHC class I	Biological process	1	13	43	23276	41.6386	0.0237578	1	1.62419	0.0232558	ERAP1
GO:0048340	paraxial mesoderm morphogenesis	Biological process	1	13	43	23276	41.6386	0.0237578	1	1.62419	0.0232558	NCKAP1
GO:0071459	protein localization to chromosome, centromeric region	Biological process	1	13	43	23276	41.6386	0.0237578	1	1.62419	0.0232558	CASC5
GO:1901213	regulation of transcription from RNA polymerase II promoter involved in heart development	Biological process	1	13	43	23276	41.6386	0.0237578	1	1.62419	0.0232558	MYOCD
GO:2000104	negative regulation of DNA-dependent DNA replication	Biological process	1	13	43	23276	41.6386	0.0237578	1	1.62419	0.0232558	SMC3
GO:0055123	digestive system development	Biological process	2	132	43	23276	8.20155	0.0247681	1	1.60611	0.0465116	MYOCD//NCKAP1
GO:0060491	regulation of cell projection assembly	Biological process	2	133	43	23276	8.13988	0.0251171	1	1.60003	0.0465116	NCKAP1//STAU2
GO:0045931	positive regulation of mitotic cell cycle	Biological process	2	134	43	23276	8.07914	0.0254682	1	1.594	0.0465116	ANP32B//EIF4E
GO:0008105	asymmetric protein localization	Biological process	1	14	43	23276	38.6645	0.0255623	1	1.5924	0.0232558	NCKAP1
GO:0030277	maintenance of gastrointestinal epithelium	Biological process	1	14	43	23276	38.6645	0.0255623	1	1.5924	0.0232558	MUC13
GO:2001015	negative regulation of skeletal muscle cell differentiation	Biological process	1	14	43	23276	38.6645	0.0255623	1	1.5924	0.0232558	MYOCD
GO:0048813	dendrite morphogenesis	Biological process	2	136	43	23276	7.96033	0.0261764	1	1.58209	0.0465116	PDLIM5//STAU2
GO:0009991	response to extracellular stimulus	Biological process	3	348	43	23276	4.6664	0.0263187	1	1.57974	0.0697674	MYOCD//TBC1D5//TBC1D14
GO:0035051	cardiocyte differentiation	Biological process	2	139	43	23276	7.78852	0.0272536	1	1.56458	0.0465116	MYOCD//PDLIM5
GO:0007350	blastoderm segmentation	Biological process	1	15	43	23276	36.0868	0.0273636	1	1.56283	0.0232558	NCKAP1
GO:0010002	cardioblast differentiation	Biological process	1	15	43	23276	36.0868	0.0273636	1	1.56283	0.0232558	MYOCD
GO:0010172	embryonic body morphogenesis	Biological process	1	15	43	23276	36.0868	0.0273636	1	1.56283	0.0232558	NCKAP1
GO:0034315	regulation of Arp2/3 complex-mediated actin nucleation	Biological process	1	15	43	23276	36.0868	0.0273636	1	1.56283	0.0232558	NCKAP1
GO:0048875	chemical homeostasis within a tissue	Biological process	1	15	43	23276	36.0868	0.0273636	1	1.56283	0.0232558	HOMER1
GO:0055012	ventricular cardiac muscle cell differentiation	Biological process	1	15	43	23276	36.0868	0.0273636	1	1.56283	0.0232558	MYOCD
GO:0061029	eyelid development in camera-type eye	Biological process	1	15	43	23276	36.0868	0.0273636	1	1.56283	0.0232558	KMT2C
GO:0007179	transforming growth factor beta receptor signaling pathway	Biological process	2	142	43	23276	7.62398	0.0283486	1	1.54747	0.0465116	MYOCD//FUT8
GO:0044092	negative regulation of molecular function	Biological process	5	938	43	23276	2.88541	0.0285507	1	1.54438	0.116279	CEP85//ZFYVE1//MARF1//CASC5//MYOCD
GO:0051346	negative regulation of hydrolase activity	Biological process	3	360	43	23276	4.51085	0.0287061	1	1.54203	0.0697674	ZFYVE1//MARF1//CASC5
GO:1904018	positive regulation of vasculature development	Biological process	2	143	43	23276	7.57066	0.0287175	1	1.54185	0.0465116	ERAP1//MYOCD
GO:0002483	antigen processing and presentation of endogenous peptide antigen	Biological process	1	16	43	23276	33.8314	0.0291616	1	1.53519	0.0232558	ERAP1
GO:0010832	negative regulation of myotube differentiation	Biological process	1	16	43	23276	33.8314	0.0291616	1	1.53519	0.0232558	MYOCD
GO:0042074	cell migration involved in gastrulation	Biological process	1	16	43	23276	33.8314	0.0291616	1	1.53519	0.0232558	NCKAP1
GO:0048148	behavioral response to cocaine	Biological process	1	16	43	23276	33.8314	0.0291616	1	1.53519	0.0232558	HOMER1
GO:0051127	positive regulation of actin nucleation	Biological process	1	16	43	23276	33.8314	0.0291616	1	1.53519	0.0232558	NCKAP1
GO:0061003	positive regulation of dendritic spine morphogenesis	Biological process	1	16	43	23276	33.8314	0.0291616	1	1.53519	0.0232558	STAU2
GO:1902187	negative regulation of viral release from host cell	Biological process	1	16	43	23276	33.8314	0.0291616	1	1.53519	0.0232558	MID2
GO:0050773	regulation of dendrite development	Biological process	2	147	43	23276	7.36466	0.0302125	1	1.51981	0.0465116	PDLIM5//STAU2
GO:0043401	steroid hormone mediated signaling pathway	Biological process	2	148	43	23276	7.3149	0.030591	1	1.51441	0.0465116	STRN3//KMT2D
GO:0044763	single-organism cellular process	Biological process	29	12142	43	23276	1.29285	0.0308086	1	1.51133	0.674419	CEP85//CASC5//EIF4E//ANP32B//PPM1D//KMT2D//MYOCD//TBC1D5//GSPT1//DAAM1//CCAR1//SMC3//ARHGAP10//KMT2C//EEA1//MARF1//FUT8//HOMER1//RALGPS2//NCKAP1//APBB3//BBS9//DENND1B//STAU2//STRN3//MID2//MICU2//PDLIM5//TBC1D14
GO:0060947	cardiac vascular smooth muscle cell differentiation	Biological process	1	17	43	23276	31.8413	0.0309563	1	1.50925	0.0232558	MYOCD
GO:0030031	cell projection assembly	Biological process	3	371	43	23276	4.37711	0.0309931	1	1.50873	0.0697674	BBS9//NCKAP1//STAU2
GO:0042692	muscle cell differentiation	Biological process	3	376	43	23276	4.3189	0.0320637	1	1.49399	0.0697674	MYOCD//HOMER1//PDLIM5
GO:0043112	receptor metabolic process	Biological process	2	152	43	23276	7.1224	0.032124	1	1.49317	0.0465116	TBC1D5//FUT8
GO:0006907	pinocytosis	Biological process	1	18	43	23276	30.0724	0.0327478	1	1.48482	0.0232558	SNX5
GO:0010592	positive regulation of lamellipodium assembly	Biological process	1	18	43	23276	30.0724	0.0327478	1	1.48482	0.0232558	NCKAP1
GO:0019883	antigen processing and presentation of endogenous antigen	Biological process	1	18	43	23276	30.0724	0.0327478	1	1.48482	0.0232558	ERAP1
GO:0033145	positive regulation of intracellular steroid hormone receptor signaling pathway	Biological process	1	18	43	23276	30.0724	0.0327478	1	1.48482	0.0232558	KMT2D
GO:0048589	developmental growth	Biological process	4	659	43	23276	3.2856	0.0328841	1	1.48301	0.0930233	KMT2D//KMT2C//MYOCD//PDLIM5
GO:0019827	stem cell population maintenance	Biological process	2	154	43	23276	7.0299	0.0329017	1	1.48278	0.0465116	SMC3//EIF4E
GO:0014706	striated muscle tissue development	Biological process	3	383	43	23276	4.23997	0.0335951	1	1.47372	0.0697674	HOMER1//MYOCD//PDLIM5
GO:0007126	meiotic nuclear division	Biological process	2	156	43	23276	6.93977	0.0336869	1	1.47254	0.0465116	MARF1//SMC3
GO:0072358	cardiovascular system development	Biological process	5	983	43	23276	2.75332	0.0339813	1	1.46876	0.116279	MYOCD//ANP32B//NCKAP1//ERAP1//PDLIM5
GO:0072359	circulatory system development	Biological process	5	983	43	23276	2.75332	0.0339813	1	1.46876	0.116279	MYOCD//ANP32B//NCKAP1//ERAP1//PDLIM5
GO:0098727	maintenance of cell number	Biological process	2	157	43	23276	6.89557	0.0340822	1	1.46747	0.0465116	SMC3//EIF4E
GO:0016570	histone modification	Biological process	3	386	43	23276	4.20701	0.034263	1	1.46517	0.0697674	KMT2C//MYOCD//KMT2D
GO:0000082	G1/S transition of mitotic cell cycle	Biological process	2	158	43	23276	6.85193	0.0344793	1	1.46244	0.0465116	ANP32B//EIF4E
GO:0007064	mitotic sister chromatid cohesion	Biological process	1	19	43	23276	28.4896	0.0345361	1	1.46173	0.0232558	SMC3
GO:0030903	notochord development	Biological process	1	19	43	23276	28.4896	0.0345361	1	1.46173	0.0232558	NCKAP1
GO:0051150	regulation of smooth muscle cell differentiation	Biological process	1	19	43	23276	28.4896	0.0345361	1	1.46173	0.0232558	MYOCD
GO:0051560	mitochondrial calcium ion homeostasis	Biological process	1	19	43	23276	28.4896	0.0345361	1	1.46173	0.0232558	MICU2
GO:2000727	positive regulation of cardiac muscle cell differentiation	Biological process	1	19	43	23276	28.4896	0.0345361	1	1.46173	0.0232558	MYOCD
GO:0045934	negative regulation of nucleobase-containing compound metabolic process	Biological process	6	1336	43	23276	2.431	0.035	1	1.45593	0.139535	MYOCD//STRN3//KMT2D//SMC3//MID2//CCAR1
GO:0010669	epithelial structure maintenance	Biological process	1	20	43	23276	27.0651	0.0363212	1	1.43984	0.0232558	MUC13
GO:0046597	negative regulation of viral entry into host cell	Biological process	1	20	43	23276	27.0651	0.0363212	1	1.43984	0.0232558	MID2
GO:0016569	covalent chromatin modification	Biological process	3	396	43	23276	4.10078	0.0365394	1	1.43724	0.0697674	KMT2C//MYOCD//KMT2D
GO:0043170	macromolecule metabolic process	Biological process	21	8031	43	23276	1.41543	0.0366902	1	1.43545	0.488372	MYOCD//STRN3//GSPT1//TBC1D5//SMC3//MARF1//KMT2D//ZZZ3//KMT2C//CCAR1//APBB3//EIF4E//CEP85//PPM1D//FUT8//ERAP1//STAU2//TC2N//ZFYVE1//CASC5//MID2
GO:0007067	mitotic nuclear division	Biological process	3	399	43	23276	4.06994	0.0372373	1	1.42902	0.0697674	SMC3//CEP85//CASC5
GO:0035265	organ growth	Biological process	2	165	43	23276	6.56124	0.03731	1	1.42817	0.0465116	MYOCD//PDLIM5
GO:0044843	cell cycle G1/S phase transition	Biological process	2	165	43	23276	6.56124	0.03731	1	1.42817	0.0465116	EIF4E//ANP32B
GO:0071560	cellular response to transforming growth factor beta stimulus	Biological process	2	165	43	23276	6.56124	0.03731	1	1.42817	0.0465116	FUT8//MYOCD
GO:1903046	meiotic cell cycle process	Biological process	2	166	43	23276	6.52171	0.0377215	1	1.42341	0.0465116	SMC3//MARF1
GO:0050794	regulation of cellular process	Biological process	25	10125	43	23276	1.33655	0.0377565	1	1.42301	0.581395	MYOCD//STRN3//TBC1D5//SMC3//ARHGAP10//KMT2C//KMT2D//ZZZ3//APBB3//CCAR1//EIF4E//CEP85//FUT8//HOMER1//RALGPS2//ANP32B//TBC1D14//MID2//NCKAP1//ZFYVE1//MARF1//CASC5//DENND1B//STAU2//PDLIM5
GO:0010667	negative regulation of cardiac muscle cell apoptotic process	Biological process	1	21	43	23276	25.7763	0.038103	1	1.41904	0.0232558	MYOCD
GO:0032897	negative regulation of viral transcription	Biological process	1	21	43	23276	25.7763	0.038103	1	1.41904	0.0232558	MID2
GO:0071559	response to transforming growth factor beta	Biological process	2	167	43	23276	6.48266	0.0381348	1	1.41868	0.0465116	FUT8//MYOCD
GO:0060537	muscle tissue development	Biological process	3	404	43	23276	4.01957	0.0384157	1	1.41549	0.0697674	HOMER1//MYOCD//PDLIM5
GO:0048339	paraxial mesoderm development	Biological process	1	22	43	23276	24.6047	0.0398816	1	1.39923	0.0232558	NCKAP1
GO:0060065	uterus development	Biological process	1	22	43	23276	24.6047	0.0398816	1	1.39923	0.0232558	MYOCD
GO:0033043	regulation of organelle organization	Biological process	5	1028	43	23276	2.63279	0.0400234	1	1.39769	0.116279	STAU2//MYOCD//CEP85//NCKAP1//TBC1D14
GO:0051493	regulation of cytoskeleton organization	Biological process	3	413	43	23276	3.93198	0.040585	1	1.39163	0.0697674	STAU2//CEP85//NCKAP1
GO:0007010	cytoskeleton organization	Biological process	5	1038	43	23276	2.60743	0.0414507	1	1.38247	0.116279	DAAM1//NCKAP1//STAU2//CEP85//ARHGAP10
GO:0008608	attachment of spindle microtubules to kinetochore	Biological process	1	23	43	23276	23.5349	0.041657	1	1.38031	0.0232558	CASC5
GO:0030511	positive regulation of transforming growth factor beta receptor signaling pathway	Biological process	1	23	43	23276	23.5349	0.041657	1	1.38031	0.0232558	MYOCD
GO:0043171	peptide catabolic process	Biological process	1	23	43	23276	23.5349	0.041657	1	1.38031	0.0232558	ERAP1
GO:1903846	positive regulation of cellular response to transforming growth factor beta stimulus	Biological process	1	23	43	23276	23.5349	0.041657	1	1.38031	0.0232558	MYOCD
GO:0010467	gene expression	Biological process	14	4760	43	23276	1.59207	0.0427564	1	1.369	0.325581	MYOCD//STRN3//GSPT1//KMT2D//ZZZ3//KMT2C//CCAR1//APBB3//EIF4E//MARF1//STAU2//FUT8//TC2N//MID2
GO:0002092	positive regulation of receptor internalization	Biological process	1	24	43	23276	22.5543	0.0434292	1	1.36222	0.0232558	TBC1D5
GO:0002369	T cell cytokine production	Biological process	1	24	43	23276	22.5543	0.0434292	1	1.36222	0.0232558	DENND1B
GO:0006491	N-glycan processing	Biological process	1	24	43	23276	22.5543	0.0434292	1	1.36222	0.0232558	FUT8
GO:0010664	negative regulation of striated muscle cell apoptotic process	Biological process	1	24	43	23276	22.5543	0.0434292	1	1.36222	0.0232558	MYOCD
GO:0048642	negative regulation of skeletal muscle tissue development	Biological process	1	24	43	23276	22.5543	0.0434292	1	1.36222	0.0232558	MYOCD
GO:0060292	long term synaptic depression	Biological process	1	24	43	23276	22.5543	0.0434292	1	1.36222	0.0232558	STAU2
GO:0044087	regulation of cellular component biogenesis	Biological process	4	721	43	23276	3.00306	0.0434632	1	1.36188	0.0930233	NCKAP1//STAU2//PDLIM5//TBC1D14
GO:0007519	skeletal muscle tissue development	Biological process	2	181	43	23276	5.98124	0.0441011	1	1.35555	0.0465116	HOMER1//MYOCD
GO:0009755	hormone-mediated signaling pathway	Biological process	2	184	43	23276	5.88372	0.0454223	1	1.34273	0.0465116	STRN3//KMT2D
GO:0007346	regulation of mitotic cell cycle	Biological process	3	433	43	23276	3.75036	0.0456249	1	1.3408	0.0697674	EIF4E//CEP85//ANP32B
GO:0035886	vascular smooth muscle cell differentiation	Biological process	1	26	43	23276	20.8193	0.046964	1	1.32823	0.0232558	MYOCD
GO:0043954	cellular component maintenance	Biological process	1	26	43	23276	20.8193	0.046964	1	1.32823	0.0232558	MYOCD
GO:0051125	regulation of actin nucleation	Biological process	1	26	43	23276	20.8193	0.046964	1	1.32823	0.0232558	NCKAP1
GO:1902745	positive regulation of lamellipodium organization	Biological process	1	26	43	23276	20.8193	0.046964	1	1.32823	0.0232558	NCKAP1
GO:2001014	regulation of skeletal muscle cell differentiation	Biological process	1	26	43	23276	20.8193	0.046964	1	1.32823	0.0232558	MYOCD
GO:0065009	regulation of molecular function	Biological process	8	2213	43	23276	1.95681	0.047293	1	1.3252	0.186047	CEP85//ZFYVE1//MARF1//CASC5//DENND1B//MYOCD//MID2//HOMER1
GO:0030522	intracellular receptor signaling pathway	Biological process	2	189	43	23276	5.72807	0.0476568	1	1.32188	0.0465116	STRN3//KMT2D
GO:0060538	skeletal muscle organ development	Biological process	2	189	43	23276	5.72807	0.0476568	1	1.32188	0.0465116	HOMER1//MYOCD
GO:0006914	autophagy	Biological process	3	444	43	23276	3.65745	0.0485245	1	1.31404	0.0697674	TBC1D14//MID2//TBC1D5
GO:0018279	protein N-linked glycosylation via asparagine	Biological process	1	27	43	23276	20.0482	0.0487266	1	1.31223	0.0232558	FUT8
GO:0044424	intracellular part	Cellular component	40	12670	43	23196	1.70305	3.84662e-08	2.08566e-05	7.41492	0.930233	STRN3//SMC3//EIF4E//DAAM1//EEA1//AFTPH//APBB3//MID2//SCAPER//HOMER1//STAU2//BBS9//DENND1B//HSPA14//NCKAP1//FUT8//PDLIM5//CCAR1//SNX5//CEP85//CEP112//CASC5//RALGPS2//ARHGAP10//ERAP1//LBR//KMT2C//KMT2D//TBC1D5//ZFYVE1//MICU2//MUC13//TBC1D14//GSPT1//ZZZ3//MARF1//MYOCD//ANP32B//TC2N//MYO7B
GO:0005622	intracellular	Cellular component	40	12802	43	23196	1.68549	5.62173e-08	2.08566e-05	7.25013	0.930233	STRN3//BBS9//CEP85//ZFYVE1//SMC3//CASC5//EIF4E//DAAM1//MICU2//MUC13//EEA1//AFTPH//HSPA14//PDLIM5//ARHGAP10//STAU2//ERAP1//MARF1//ZZZ3//MYOCD//APBB3//KMT2C//SCAPER//KMT2D//ANP32B//TC2N//LBR//CCAR1//MID2//HOMER1//DENND1B//NCKAP1//FUT8//SNX5//CEP112//RALGPS2//TBC1D5//TBC1D14//MYO7B//GSPT1
GO:0043226	organelle	Cellular component	37	12018	43	23196	1.66079	2.43223e-06	0.000601571	5.614	0.860465	BBS9//EEA1//DENND1B//SNX5//TBC1D5//AFTPH//ERAP1//MICU2//ZFYVE1//STAU2//MARF1//ZZZ3//SMC3//MYOCD//APBB3//KMT2C//SCAPER//KMT2D//ANP32B//CEP85//TC2N//CASC5//STRN3//LBR//TBC1D14//FUT8//EIF4E//MUC13//MYO7B//MID2//NCKAP1//HSPA14//CEP112//HOMER1//PDLIM5//DAAM1//CCAR1
GO:0043229	intracellular organelle	Cellular component	35	10996	43	23196	1.71703	4.65854e-06	0.000857778	5.33175	0.813953	AFTPH//ERAP1//EEA1//DENND1B//SNX5//TBC1D5//MICU2//ZFYVE1//STAU2//ZZZ3//SMC3//MYOCD//APBB3//KMT2C//SCAPER//KMT2D//ANP32B//CEP85//TC2N//CASC5//STRN3//LBR//TBC1D14//FUT8//HSPA14//CEP112//MYO7B//MID2//BBS9//MARF1//PDLIM5//EIF4E//HOMER1//DAAM1//CCAR1
GO:0005737	cytoplasm	Cellular component	33	9903	43	23196	1.79759	5.78018e-06	0.000857778	5.23806	0.767442	EEA1//DENND1B//SNX5//TBC1D5//CASC5//EIF4E//STAU2//BBS9//CEP85//ZFYVE1//MICU2//MUC13//AFTPH//HSPA14//PDLIM5//ARHGAP10//ERAP1//MARF1//TBC1D14//FUT8//STRN3//GSPT1//HOMER1//NCKAP1//SMC3//DAAM1//APBB3//MID2//SCAPER//CCAR1//CEP112//RALGPS2//LBR
GO:0044464	cell part	Cellular component	40	14770	43	23196	1.46091	9.57223e-06	0.00104902	5.01899	0.930233	MUC13//MYO7B//DAAM1//HOMER1//BBS9//NCKAP1//PDLIM5//SNX5//CEP112//RALGPS2//ARHGAP10//ERAP1//STRN3//AFTPH//MID2//TBC1D5//STAU2//SMC3//EIF4E//EEA1//APBB3//SCAPER//DENND1B//HSPA14//FUT8//CCAR1//CEP85//CASC5//LBR//ZZZ3//KMT2C//KMT2D//MICU2//ZFYVE1//MYOCD//ANP32B//TC2N//TBC1D14//GSPT1//MARF1
GO:0005623	cell	Cellular component	40	14784	43	23196	1.45953	9.89638e-06	0.00104902	5.00452	0.930233	MUC13//MYO7B//DAAM1//HOMER1//BBS9//NCKAP1//PDLIM5//SNX5//CEP112//RALGPS2//ARHGAP10//ERAP1//STRN3//CEP85//AFTPH//MID2//ZFYVE1//SMC3//CASC5//EIF4E//MICU2//EEA1//HSPA14//STAU2//MARF1//ZZZ3//MYOCD//APBB3//KMT2C//SCAPER//KMT2D//ANP32B//TC2N//LBR//CCAR1//DENND1B//FUT8//TBC1D5//TBC1D14//GSPT1
GO:0044422	organelle part	Cellular component	25	6159	43	23196	2.18965	1.22111e-05	0.00113258	4.91325	0.581395	STAU2//LBR//ZFYVE1//BBS9//HOMER1//PDLIM5//TBC1D5//SNX5//CCAR1//MICU2//ERAP1//SMC3//CASC5//AFTPH//STRN3//ZZZ3//CEP85//KMT2C//KMT2D//DAAM1//CEP112//MID2//MYO7B//FUT8//MYOCD
GO:0044446	intracellular organelle part	Cellular component	23	5958	43	23196	2.08244	9.16208e-05	0.00755363	4.03801	0.534884	SNX5//ZFYVE1//LBR//CCAR1//MICU2//CASC5//SMC3//AFTPH//STRN3//ZZZ3//CEP85//STAU2//MID2//MYO7B//ERAP1//TBC1D5//FUT8//CEP112//BBS9//DAAM1//KMT2C//KMT2D//MYOCD
GO:0005776	autophagosome	Cellular component	3	52	43	23196	31.1216	0.000123084	0.00913283	3.9098	0.0697674	TBC1D14//ZFYVE1//TBC1D5
GO:0044444	cytoplasmic part	Cellular component	24	6674	43	23196	1.93986	0.000184345	0.0124349	3.73437	0.55814	ZFYVE1//MICU2//MUC13//EEA1//AFTPH//HSPA14//PDLIM5//ARHGAP10//STAU2//ERAP1//SNX5//TBC1D5//TBC1D14//FUT8//CEP85//STRN3//EIF4E//GSPT1//NCKAP1//DENND1B//MARF1//HOMER1//BBS9//CASC5
GO:0032991	macromolecular complex	Cellular component	19	4571	43	23196	2.24227	0.000225161	0.0139224	3.64751	0.44186	SMC3//EIF4E//STRN3//CASC5//MYO7B//GSPT1//NCKAP1//BBS9//HSPA14//STAU2//SNX5//TBC1D5//MICU2//EEA1//MYOCD//AFTPH//KMT2C//KMT2D//ZZZ3
GO:0043234	protein complex	Cellular component	17	3826	43	23196	2.39689	0.000261704	0.0149372	3.58219	0.395349	CASC5//SMC3//EIF4E//MYO7B//GSPT1//NCKAP1//BBS9//SNX5//TBC1D5//AFTPH//MYOCD//MICU2//EEA1//STRN3//KMT2C//KMT2D//ZZZ3
GO:0030125	clathrin vesicle coat	Cellular component	2	17	43	23196	63.4637	0.000448512	0.0237711	3.34823	0.0465116	TBC1D5//AFTPH
GO:0000242	pericentriolar material	Cellular component	2	18	43	23196	59.938	0.000503982	0.0249303	3.29758	0.0465116	BBS9//CEP85
GO:0030904	retromer complex	Cellular component	2	22	43	23196	49.0402	0.000757341	0.0351217	3.12071	0.0465116	SNX5//TBC1D5
GO:0030665	clathrin-coated vesicle membrane	Cellular component	2	25	43	23196	43.1553	0.000980095	0.0427783	3.00873	0.0465116	TBC1D5//AFTPH
GO:0030131	clathrin adaptor complex	Cellular component	2	26	43	23196	41.4955	0.00106052	0.0437171	2.97448	0.0465116	AFTPH//TBC1D5
GO:0031312	extrinsic component of organelle membrane	Cellular component	2	28	43	23196	38.5316	0.00123057	0.048057	2.90989	0.0465116	SNX5//ZFYVE1
GO:0043228	non-membrane-bounded organelle	Cellular component	15	3655	43	23196	2.21385	0.00164867	0.0551932	2.78287	0.348837	CASC5//HSPA14//SMC3//ZZZ3//CEP85//CEP112//MYO7B//MID2//BBS9//APBB3//PDLIM5//EIF4E//STAU2//HOMER1//DAAM1
GO:0043232	intracellular non-membrane-bounded organelle	Cellular component	15	3655	43	23196	2.21385	0.00164867	0.0551932	2.78287	0.348837	CASC5//HSPA14//SMC3//ZZZ3//CEP85//CEP112//MYO7B//MID2//BBS9//APBB3//PDLIM5//HOMER1//EIF4E//STAU2//DAAM1
GO:0010494	cytoplasmic stress granule	Cellular component	2	33	43	23196	32.6934	0.00170882	0.0551932	2.7673	0.0465116	EIF4E//STAU2
GO:0005856	cytoskeleton	Cellular component	10	1852	43	23196	2.91275	0.00171084	0.0551932	2.76679	0.232558	APBB3//PDLIM5//MYO7B//MID2//STAU2//BBS9//CEP85//SMC3//DAAM1//CEP112
GO:0012505	endomembrane system	Cellular component	14	3333	43	23196	2.26588	0.0020058	0.0603027	2.69771	0.325581	ZFYVE1//STAU2//ERAP1//LBR//EEA1//SNX5//TBC1D5//TBC1D14//AFTPH//FUT8//CEP85//STRN3//CASC5//CCAR1
GO:0030120	vesicle coat	Cellular component	2	36	43	23196	29.969	0.00203176	0.0603027	2.69213	0.0465116	TBC1D5//AFTPH
GO:0044430	cytoskeletal part	Cellular component	8	1284	43	23196	3.36101	0.00220904	0.0630426	2.6558	0.186047	SMC3//CEP85//MID2//STAU2//MYO7B//CEP112//BBS9//DAAM1
GO:0030119	AP-type membrane coat adaptor complex	Cellular component	2	41	43	23196	26.3142	0.00262903	0.0722497	2.5802	0.0465116	AFTPH//TBC1D5
GO:0043227	membrane-bounded organelle	Cellular component	30	11071	43	23196	1.46177	0.00285642	0.0756953	2.54418	0.697674	AFTPH//ERAP1//MICU2//ZFYVE1//STAU2//ZZZ3//SMC3//MYOCD//APBB3//KMT2C//SCAPER//KMT2D//ANP32B//CEP85//TC2N//CASC5//STRN3//LBR//EEA1//SNX5//TBC1D5//TBC1D14//FUT8//EIF4E//MUC13//MYO7B//MID2//NCKAP1//MARF1//CCAR1
GO:0030118	clathrin coat	Cellular component	2	46	43	23196	23.454	0.00329894	0.0815938	2.48163	0.0465116	TBC1D5//AFTPH
GO:0030662	coated vesicle membrane	Cellular component	2	46	43	23196	23.454	0.00329894	0.0815938	2.48163	0.0465116	TBC1D5//AFTPH
GO:0043198	dendritic shaft	Cellular component	2	59	43	23196	18.2862	0.00537113	0.128561	2.26993	0.0465116	HOMER1//STAU2
GO:1990234	transferase complex	Cellular component	5	665	43	23196	4.05595	0.00746822	0.167273	2.12678	0.116279	EEA1//KMT2C//KMT2D//ZZZ3//TBC1D5
GO:0015629	actin cytoskeleton	Cellular component	4	420	43	23196	5.13754	0.00749147	0.167273	2.12543	0.0930233	MYO7B//DAAM1//APBB3//PDLIM5
GO:0005795	Golgi stack	Cellular component	2	71	43	23196	15.1955	0.00769204	0.167273	2.11396	0.0465116	FUT8//ZFYVE1
GO:0031982	vesicle	Cellular component	13	3461	43	23196	2.02622	0.00806108	0.167273	2.09361	0.302326	EEA1//DENND1B//SNX5//TBC1D5//EIF4E//MUC13//MYO7B//MID2//NCKAP1//FUT8//CASC5//ERAP1//AFTPH
GO:0035097	histone methyltransferase complex	Cellular component	2	73	43	23196	14.7792	0.00811567	0.167273	2.09068	0.0465116	KMT2C//KMT2D
GO:0031970	organelle envelope lumen	Cellular component	2	76	43	23196	14.1958	0.00877043	0.173857	2.05698	0.0465116	CCAR1//MICU2
GO:1902494	catalytic complex	Cellular component	6	979	43	23196	3.30608	0.00893452	0.173857	2.04893	0.139535	EEA1//STRN3//KMT2C//KMT2D//ZZZ3//TBC1D5
GO:0031974	membrane-enclosed lumen	Cellular component	12	3110	43	23196	2.08145	0.00913803	0.173857	2.03915	0.27907	CCAR1//MICU2//ERAP1//SMC3//AFTPH//CASC5//STRN3//ZZZ3//CEP85//LBR//KMT2C//KMT2D
GO:0015630	microtubule cytoskeleton	Cellular component	6	993	43	23196	3.25947	0.00954589	0.177076	2.02018	0.139535	MID2//STAU2//CEP85//CEP112//BBS9//SMC3
GO:0005886	plasma membrane	Cellular component	15	4434	43	23196	1.8249	0.0108358	0.18743	1.96514	0.348837	MUC13//EEA1//SNX5//TBC1D5//HOMER1//PDLIM5//MYO7B//DAAM1//BBS9//NCKAP1//CEP112//RALGPS2//ARHGAP10//ERAP1//STRN3
GO:0030117	membrane coat	Cellular component	2	85	43	23196	12.6927	0.0108712	0.18743	1.96372	0.0465116	TBC1D5//AFTPH
GO:0048475	coated membrane	Cellular component	2	85	43	23196	12.6927	0.0108712	0.18743	1.96372	0.0465116	TBC1D5//AFTPH
GO:0019898	extrinsic component of membrane	Cellular component	3	252	43	23196	6.42193	0.0113545	0.18743	1.94483	0.0697674	EEA1//SNX5//ZFYVE1
GO:0030136	clathrin-coated vesicle	Cellular component	2	89	43	23196	12.1223	0.0118693	0.18743	1.92558	0.0465116	TBC1D5//AFTPH
GO:0034708	methyltransferase complex	Cellular component	2	89	43	23196	12.1223	0.0118693	0.18743	1.92558	0.0465116	KMT2C//KMT2D
GO:0044428	nuclear part	Cellular component	12	3224	43	23196	2.00785	0.0120653	0.18743	1.91846	0.27907	LBR//CCAR1//SMC3//AFTPH//CASC5//STRN3//ZZZ3//CEP85//STAU2//KMT2C//KMT2D//MYOCD
GO:0000922	spindle pole	Cellular component	2	90	43	23196	11.9876	0.0121249	0.18743	1.91632	0.0465116	SMC3//CEP85
GO:0031090	organelle membrane	Cellular component	8	1726	43	23196	2.50031	0.012879	0.195025	1.89012	0.186047	STAU2//LBR//TBC1D5//FUT8//SNX5//MICU2//ZFYVE1//AFTPH
GO:0031410	cytoplasmic vesicle	Cellular component	6	1070	43	23196	3.02491	0.0134583	0.197603	1.87101	0.139535	CASC5//AFTPH//TBC1D5//EEA1//DENND1B//SNX5
GO:0071944	cell periphery	Cellular component	15	4546	43	23196	1.77994	0.0135819	0.197603	1.86704	0.348837	MUC13//MYO7B//DAAM1//HOMER1//BBS9//NCKAP1//PDLIM5//SNX5//CEP112//RALGPS2//ARHGAP10//ERAP1//STRN3//EEA1//TBC1D5
GO:0030018	Z disc	Cellular component	2	102	43	23196	10.5773	0.0153776	0.219426	1.81311	0.0465116	HOMER1//PDLIM5
GO:0034399	nuclear periphery	Cellular component	2	104	43	23196	10.3739	0.0159524	0.223193	1.79717	0.0465116	LBR//SMC3
GO:0055037	recycling endosome	Cellular component	2	105	43	23196	10.2751	0.0162432	0.223193	1.78933	0.0465116	TBC1D14//EEA1
GO:0005845	mRNA cap binding complex	Cellular component	1	10	43	23196	53.9442	0.0183873	0.235231	1.73548	0.0232558	EIF4E
GO:0030669	clathrin-coated endocytic vesicle membrane	Cellular component	1	10	43	23196	53.9442	0.0183873	0.235231	1.73548	0.0232558	TBC1D5
GO:0034518	RNA cap binding complex	Cellular component	1	10	43	23196	53.9442	0.0183873	0.235231	1.73548	0.0232558	EIF4E
GO:1990124	messenger ribonucleoprotein complex	Cellular component	1	10	43	23196	53.9442	0.0183873	0.235231	1.73548	0.0232558	STAU2
GO:0031674	I band	Cellular component	2	117	43	23196	9.22123	0.0199079	0.238003	1.70097	0.0465116	HOMER1//PDLIM5
GO:0012510	trans-Golgi network transport vesicle membrane	Cellular component	1	11	43	23196	49.0402	0.0202078	0.238003	1.69448	0.0232558	AFTPH
GO:0016442	RISC complex	Cellular component	1	11	43	23196	49.0402	0.0202078	0.238003	1.69448	0.0232558	EIF4E
GO:0031332	RNAi effector complex	Cellular component	1	11	43	23196	49.0402	0.0202078	0.238003	1.69448	0.0232558	EIF4E
GO:0044232	organelle membrane contact site	Cellular component	1	11	43	23196	49.0402	0.0202078	0.238003	1.69448	0.0232558	ZFYVE1
GO:0005652	nuclear lamina	Cellular component	1	12	43	23196	44.9535	0.022025	0.247167	1.65708	0.0232558	LBR
GO:0008278	cohesin complex	Cellular component	1	12	43	23196	44.9535	0.022025	0.247167	1.65708	0.0232558	SMC3
GO:0044450	microtubule organizing center part	Cellular component	2	124	43	23196	8.70068	0.0221909	0.247167	1.65383	0.0465116	BBS9//CEP85
GO:0005641	nuclear envelope lumen	Cellular component	1	13	43	23196	41.4955	0.0238389	0.247167	1.62271	0.0232558	CCAR1
GO:0030132	clathrin coat of coated pit	Cellular component	1	13	43	23196	41.4955	0.0238389	0.247167	1.62271	0.0232558	TBC1D5
GO:0032580	Golgi cisterna membrane	Cellular component	1	13	43	23196	41.4955	0.0238389	0.247167	1.62271	0.0232558	FUT8
GO:0030135	coated vesicle	Cellular component	2	129	43	23196	8.36344	0.023885	0.247167	1.62188	0.0465116	TBC1D5//AFTPH
GO:0036464	cytoplasmic ribonucleoprotein granule	Cellular component	2	129	43	23196	8.36344	0.023885	0.247167	1.62188	0.0465116	EIF4E//STAU2
GO:0005635	nuclear envelope	Cellular component	3	341	43	23196	4.74582	0.0252	0.247167	1.5986	0.0697674	CCAR1//LBR//STAU2
GO:0000800	lateral element	Cellular component	1	14	43	23196	38.5316	0.0256494	0.247167	1.59092	0.0232558	SMC3
GO:0005639	integral component of nuclear inner membrane	Cellular component	1	14	43	23196	38.5316	0.0256494	0.247167	1.59092	0.0232558	LBR
GO:0005671	Ada2/Gcn5/Ada3 transcription activator complex	Cellular component	1	14	43	23196	38.5316	0.0256494	0.247167	1.59092	0.0232558	ZZZ3
GO:0031229	intrinsic component of nuclear inner membrane	Cellular component	1	14	43	23196	38.5316	0.0256494	0.247167	1.59092	0.0232558	LBR
GO:0033391	chromatoid body	Cellular component	1	14	43	23196	38.5316	0.0256494	0.247167	1.59092	0.0232558	EIF4E
GO:0035770	ribonucleoprotein granule	Cellular component	2	136	43	23196	7.93297	0.0263432	0.24731	1.57933	0.0465116	EIF4E//STAU2
GO:0031988	membrane-bounded vesicle	Cellular component	11	3168	43	23196	1.87306	0.0266424	0.24731	1.57443	0.255814	EIF4E//MUC13//MYO7B//EEA1//MID2//NCKAP1//FUT8//CASC5//ERAP1//TBC1D5//AFTPH
GO:0042995	cell projection	Cellular component	8	1972	43	23196	2.18841	0.0266642	0.24731	1.57407	0.186047	BBS9//HOMER1//PDLIM5//NCKAP1//SNX5//STAU2//STRN3//EEA1
GO:0005794	Golgi apparatus	Cellular component	6	1253	43	23196	2.58312	0.0270559	0.247845	1.56774	0.139535	ZFYVE1//AFTPH//FUT8//TBC1D14//CEP85//STRN3
GO:0044453	nuclear membrane part	Cellular component	1	15	43	23196	35.9628	0.0274568	0.24845	1.56135	0.0232558	LBR
GO:0019897	extrinsic component of plasma membrane	Cellular component	2	141	43	23196	7.65166	0.0281594	0.251738	1.55038	0.0465116	SNX5//EEA1
GO:0000159	protein phosphatase type 2A complex	Cellular component	1	16	43	23196	33.7151	0.0292608	0.25847	1.53371	0.0232558	STRN3
GO:0030666	endocytic vesicle membrane	Cellular component	1	17	43	23196	31.7319	0.0310616	0.267996	1.50778	0.0232558	TBC1D5
GO:0060077	inhibitory synapse	Cellular component	1	17	43	23196	31.7319	0.0310616	0.267996	1.50778	0.0232558	CEP112
GO:0043231	intracellular membrane-bounded organelle	Cellular component	25	9959	43	23196	1.35416	0.0319274	0.2723	1.49584	0.581395	MICU2//ZFYVE1//STAU2//ERAP1//ZZZ3//SMC3//MYOCD//AFTPH//APBB3//KMT2C//SCAPER//KMT2D//ANP32B//CEP85//TC2N//CASC5//STRN3//LBR//EEA1//SNX5//TBC1D5//TBC1D14//FUT8//MARF1//CCAR1
GO:0010008	endosome membrane	Cellular component	2	152	43	23196	7.09792	0.0323266	0.272572	1.49044	0.0465116	SNX5//TBC1D5
GO:0043034	costamere	Cellular component	1	19	43	23196	28.3917	0.0346533	0.288907	1.46026	0.0232558	HOMER1
GO:0045334	clathrin-coated endocytic vesicle	Cellular component	1	20	43	23196	26.9721	0.0364443	0.300463	1.43837	0.0232558	TBC1D5
GO:0030017	sarcomere	Cellular component	2	166	43	23196	6.4993	0.0379574	0.303353	1.4207	0.0465116	HOMER1//PDLIM5
GO:0044440	endosomal part	Cellular component	2	166	43	23196	6.4993	0.0379574	0.303353	1.4207	0.0465116	TBC1D5//SNX5
GO:0005768	endosome	Cellular component	4	688	43	23196	3.13629	0.0380213	0.303353	1.41997	0.0930233	EEA1//TBC1D14//SNX5//TBC1D5
GO:0000775	chromosome, centromeric region	Cellular component	2	171	43	23196	6.30926	0.0400535	0.316167	1.39736	0.0465116	CASC5//SMC3
GO:0044431	Golgi apparatus part	Cellular component	3	414	43	23196	3.909	0.0411802	0.321639	1.38531	0.0697674	AFTPH//FUT8//ZFYVE1
GO:0044449	contractile fiber part	Cellular component	2	179	43	23196	6.02728	0.0434967	0.329288	1.36154	0.0465116	HOMER1//PDLIM5
GO:0034451	centriolar satellite	Cellular component	1	24	43	23196	22.4767	0.0435759	0.329288	1.36075	0.0232558	BBS9
GO:0016020	membrane	Cellular component	23	9161	43	23196	1.35435	0.043769	0.329288	1.35883	0.534884	MUC13//MYO7B//DAAM1//HOMER1//BBS9//NCKAP1//PDLIM5//SNX5//CEP112//RALGPS2//ARHGAP10//ERAP1//STRN3//STAU2//LBR//TBC1D5//FUT8//EEA1//MICU2//ZFYVE1//AFTPH//MARF1//HSPA14
GO:0030659	cytoplasmic vesicle membrane	Cellular component	2	180	43	23196	5.9938	0.0439347	0.329288	1.35719	0.0465116	TBC1D5//AFTPH
GO:0070062	extracellular exosome	Cellular component	9	2589	43	23196	1.87523	0.0449558	0.333572	1.34721	0.209302	EIF4E//MUC13//MYO7B//EEA1//MID2//NCKAP1//FUT8//CASC5//ERAP1
GO:0065010	extracellular membrane-bounded organelle	Cellular component	9	2596	43	23196	1.87018	0.0456178	0.335133	1.34087	0.209302	EIF4E//MUC13//MYO7B//EEA1//MID2//NCKAP1//FUT8//CASC5//ERAP1
GO:1903561	extracellular vesicle	Cellular component	9	2602	43	23196	1.86586	0.0461906	0.336014	1.33545	0.209302	EIF4E//MUC13//MYO7B//EEA1//MID2//NCKAP1//FUT8//CASC5//ERAP1
GO:0043230	extracellular organelle	Cellular component	9	2609	43	23196	1.86086	0.0468651	0.3362	1.32915	0.209302	EIF4E//MUC13//MYO7B//EEA1//MID2//NCKAP1//FUT8//CASC5//ERAP1
GO:0030140	trans-Golgi network transport vesicle	Cellular component	1	26	43	23196	20.7478	0.0471223	0.3362	1.32677	0.0232558	AFTPH
GO:0030016	myofibril	Cellular component	2	189	43	23196	5.70838	0.0479505	0.336766	1.31921	0.0465116	HOMER1//PDLIM5
GO:0070013	intracellular organelle lumen	Cellular component	10	3046	43	23196	1.77098	0.0484627	0.336766	1.31459	0.232558	ERAP1//SMC3//AFTPH//CASC5//STRN3//ZZZ3//CEP85//LBR//KMT2C//KMT2D
GO:0035869	ciliary transition zone	Cellular component	1	27	43	23196	19.9793	0.0488907	0.336766	1.31077	0.0232558	BBS9
GO:0043233	organelle lumen	Cellular component	10	3052	43	23196	1.7675	0.0490171	0.336766	1.30965	0.232558	ERAP1//SMC3//AFTPH//CASC5//STRN3//ZZZ3//CEP85//LBR//KMT2C//KMT2D
GO:0044433	cytoplasmic vesicle part	Cellular component	2	193	43	23196	5.59007	0.0497772	0.33699	1.30297	0.0465116	AFTPH//TBC1D5
GO:0005634	nucleus	Cellular component	17	6261	43	23196	1.4647	0.0499581	0.33699	1.30139	0.395349	SMC3//LBR//CCAR1//AFTPH//CASC5//STRN3//ZZZ3//CEP85//STAU2//KMT2C//KMT2D//MYOCD//APBB3//SCAPER//ANP32B//MICU2//TC2N
GO:0005515	protein binding	Molecular function	28	7819	43	22849	1.90285	3.43191e-05	0.0513414	4.46446	0.651163	LBR//HOMER1//STRN3//MYOCD//APBB3//DAAM1//EIF4E//AFTPH//EEA1//NCKAP1//SMC3//PDLIM5//MID2//MUC13//MICU2//MYO7B//STAU2//SNX5//FUT8//TBC1D5//ERAP1//TBC1D14//PPM1D//KMT2C//BBS9//KMT2D//CCAR1//ARHGAP10
GO:0005488	binding	Molecular function	35	12258	43	22849	1.51722	0.000138453	0.103563	3.8587	0.813953	SMC3//EIF4E//DAAM1//MYOCD//EEA1//KMT2C//HOMER1//BBS9//KMT2D//NCKAP1//PDLIM5//CCAR1//MICU2//ARHGAP10//SNX5//LBR//STRN3//APBB3//AFTPH//MID2//ERAP1//GSPT1//MYO7B//MARF1//HSPA14//PPM1D//FUT8//STAU2//TBC1D5//MUC13//ZZZ3//ZFC3H1//ZFYVE1//TBC1D14//TC2N
GO:0005545	1-phosphatidylinositol binding	Molecular function	2	15	43	22849	70.8496	0.000357633	0.17834	3.44656	0.0465116	EEA1//ZFYVE1
GO:0051019	mitogen-activated protein kinase binding	Molecular function	2	28	43	22849	37.9551	0.00126764	0.474099	2.897	0.0465116	STAU2//PPM1D
GO:0018024	histone-lysine N-methyltransferase activity	Molecular function	2	42	43	22849	25.3034	0.0028396	0.84961	2.54674	0.0465116	KMT2C//KMT2D
GO:0008092	cytoskeletal protein binding	Molecular function	6	799	43	22849	3.99028	0.00362742	0.872808	2.4404	0.139535	MYO7B//DAAM1//PDLIM5//STAU2//SNX5//MID2
GO:0042054	histone methyltransferase activity	Molecular function	2	55	43	22849	19.3226	0.00482236	0.872808	2.31674	0.0465116	KMT2C//KMT2D
GO:0044822	poly(A) RNA binding	Molecular function	7	1137	43	22849	3.27142	0.00496827	0.872808	2.3038	0.162791	EIF4E//GSPT1//ZFC3H1//KMT2C//STAU2//CCAR1//LBR
GO:0019899	enzyme binding	Molecular function	9	1784	43	22849	2.68069	0.00525085	0.872808	2.27977	0.209302	MYOCD//TBC1D14//STAU2//PPM1D//PDLIM5//STRN3//DAAM1//NCKAP1//EIF4E
GO:0035091	phosphatidylinositol binding	Molecular function	3	195	43	22849	8.17496	0.00587772	0.879307	2.23079	0.0697674	EEA1//ZFYVE1//SNX5
GO:0003723	RNA binding	Molecular function	8	1558	43	22849	2.72848	0.0078039	1	2.10769	0.186047	STAU2//EIF4E//GSPT1//ZFC3H1//KMT2C//CCAR1//LBR//MARF1
GO:0005096	GTPase activator activity	Molecular function	3	224	43	22849	7.11659	0.00859736	1	2.06563	0.0697674	TBC1D14//TBC1D5//ARHGAP10
GO:0008270	zinc ion binding	Molecular function	6	982	43	22849	3.24667	0.00972095	1	2.01229	0.139535	ZZZ3//KMT2C//MID2//KMT2D//PDLIM5//ERAP1
GO:0008135	translation factor activity, RNA binding	Molecular function	2	82	43	22849	12.9603	0.0104442	1	1.98112	0.0465116	EIF4E//GSPT1
GO:0030695	GTPase regulator activity	Molecular function	3	242	43	22849	6.58726	0.0106015	1	1.97463	0.0697674	TBC1D14//TBC1D5//ARHGAP10
GO:0017048	Rho GTPase binding	Molecular function	2	87	43	22849	12.2155	0.0116955	1	1.93198	0.0465116	NCKAP1//DAAM1
GO:0060589	nucleoside-triphosphatase regulator activity	Molecular function	3	264	43	22849	6.03832	0.0133909	1	1.87319	0.0697674	TBC1D14//TBC1D5//ARHGAP10
GO:0046982	protein heterodimerization activity	Molecular function	4	497	43	22849	4.27664	0.0139745	1	1.85466	0.0930233	SMC3//MID2//HOMER1//MICU2
GO:0042277	peptide binding	Molecular function	3	270	43	22849	5.90413	0.0142176	1	1.84717	0.0697674	APBB3//LBR//ERAP1
GO:0033218	amide binding	Molecular function	3	295	43	22849	5.40378	0.0179712	1	1.74542	0.0697674	ERAP1//APBB3//LBR
GO:0016278	lysine N-methyltransferase activity	Molecular function	2	121	43	22849	8.78301	0.0218026	1	1.66149	0.0465116	KMT2C//KMT2D
GO:0016279	protein-lysine N-methyltransferase activity	Molecular function	2	121	43	22849	8.78301	0.0218026	1	1.66149	0.0465116	KMT2C//KMT2D
GO:0043167	ion binding	Molecular function	16	5178	43	22849	1.64194	0.0220042	1	1.65749	0.372093	PPM1D//ZZZ3//EEA1//ZFYVE1//KMT2C//MID2//KMT2D//PDLIM5//ERAP1//MICU2//TC2N//SNX5//SMC3//MYO7B//HSPA14//GSPT1
GO:0070006	metalloaminopeptidase activity	Molecular function	1	12	43	22849	44.281	0.0223561	1	1.6506	0.0232558	ERAP1
GO:0046983	protein dimerization activity	Molecular function	6	1182	43	22849	2.69732	0.0224317	1	1.64914	0.139535	MUC13//EEA1//MID2//SMC3//HOMER1//MICU2
GO:0019901	protein kinase binding	Molecular function	4	580	43	22849	3.66464	0.0232188	1	1.63416	0.0930233	STAU2//PPM1D//PDLIM5//TBC1D14
GO:0070016	armadillo repeat domain binding	Molecular function	1	13	43	22849	40.8748	0.0241969	1	1.61624	0.0232558	STRN3
GO:0005543	phospholipid binding	Molecular function	3	331	43	22849	4.81606	0.024261	1	1.61509	0.0697674	SNX5//EEA1//ZFYVE1
GO:0046914	transition metal ion binding	Molecular function	6	1220	43	22849	2.61331	0.0257344	1	1.58949	0.139535	ZZZ3//KMT2C//MID2//KMT2D//PDLIM5//ERAP1
GO:0008170	N-methyltransferase activity	Molecular function	2	136	43	22849	7.8143	0.0270853	1	1.56727	0.0465116	KMT2C//KMT2D
GO:0008276	protein methyltransferase activity	Molecular function	2	139	43	22849	7.64564	0.0281982	1	1.54978	0.0465116	KMT2C//KMT2D
GO:0042800	histone methyltransferase activity (H3-K4 specific)	Molecular function	1	17	43	22849	31.2572	0.0315264	1	1.50133	0.0232558	KMT2C
GO:0019900	kinase binding	Molecular function	4	642	43	22849	3.31073	0.0321028	1	1.49346	0.0930233	TBC1D14//STAU2//PPM1D//PDLIM5
GO:0003779	actin binding	Molecular function	3	374	43	22849	4.26234	0.0331486	1	1.47953	0.0697674	MYO7B//DAAM1//PDLIM5
GO:0043325	phosphatidylinositol-3,4-bisphosphate binding	Molecular function	1	20	43	22849	26.5686	0.0369881	1	1.43194	0.0232558	ZFYVE1
GO:0008047	enzyme activator activity	Molecular function	3	393	43	22849	4.05628	0.0375494	1	1.4254	0.0697674	TBC1D14//TBC1D5//ARHGAP10
GO:0008139	nuclear localization sequence binding	Molecular function	1	21	43	22849	25.3034	0.038802	1	1.41115	0.0232558	LBR
GO:0030742	GTP-dependent protein binding	Molecular function	1	21	43	22849	25.3034	0.038802	1	1.41115	0.0232558	EEA1
GO:0046872	metal ion binding	Molecular function	11	3317	43	22849	1.76216	0.0396261	1	1.40202	0.255814	MICU2//TC2N//ZZZ3//KMT2C//MID2//KMT2D//PDLIM5//ERAP1//EEA1//ZFYVE1//PPM1D
GO:0001047	core promoter binding	Molecular function	2	169	43	22849	6.28843	0.0402915	1	1.39479	0.0465116	MYOCD//CCAR1
GO:0032403	protein complex binding	Molecular function	5	1016	43	22849	2.61502	0.0410145	1	1.38706	0.116279	MID2//TBC1D5//SMC3//NCKAP1//STRN3
GO:0070412	R-SMAD binding	Molecular function	1	23	43	22849	23.1031	0.0424198	1	1.37243	0.0232558	MYOCD
GO:0008757	S-adenosylmethionine-dependent methyltransferase activity	Molecular function	2	176	43	22849	6.03832	0.0433515	1	1.363	0.0465116	KMT2C//KMT2D
GO:0003676	nucleic acid binding	Molecular function	11	3380	43	22849	1.72932	0.0446214	1	1.35046	0.255814	ZZZ3//KMT2C//LBR//EIF4E//MARF1//STAU2//GSPT1//ZFC3H1//CCAR1//KMT2D//MYOCD
GO:0005085	guanyl-nucleotide exchange factor activity	Molecular function	2	181	43	22849	5.87151	0.0455891	1	1.34114	0.0465116	DENND1B//RALGPS2
GO:0043169	cation binding	Molecular function	11	3407	43	22849	1.71561	0.0468937	1	1.32889	0.255814	ZZZ3//EEA1//ZFYVE1//KMT2C//MID2//KMT2D//PPM1D//PDLIM5//ERAP1//MICU2//TC2N

## Sheet: up DSS+5-ASA vs Control
#Column "GO.ID" stands for the ID of gene ontology term
#Column "Term" stands for the name of gene ontology term
#Column "Ontology" stands for the ontology of GOID belongs to
#Column "Count" stands for the number of DE genes associated with the listed GOID
#Column "Pop.Hits" stands for the number of background population genes associated with the listed GOID
#Column "List.Total" stands for the total number of DE genes
#Column "Pop.Total" stands for the total number of background population genes
#Column "Fold.Enrichment" stands for the Fold Enrichment value of the GOID, it equals (Count/Pop.Hits)/(List.Total/Pop.Total)
#Column "Pvalue" stands for the significance testing value of the GOID
#Column "FDR" stands for the false discovery rate of the GOID, using Benjamini & Hochberg (1995) method
#Column "Enrichment.Score" stands for the Enrichment Score value of the GOID, it equals (-log10(Pvalue))
#Column "Gene.Ratio" stands for the Gene Ratio value genes associated with the GOID, it equals (Count/List.Total)
#Column "GENES" stands for the DE genes associated with the GOID
GO.ID	Term	Ontology	Count	Pop.Hits	List.Total	Pop.Total	Fold.Enrichment	Pvalue	FDR	Enrichment.Score	Gene.Ratio	GENES
GO:1902582	single-organism intracellular transport	Biological process	13	1362	45	23276	4.93699	1.11807e-06	0.00678223	5.95153	0.288889	ATP9A//ATP9B//STX8//SETD2//HIF1A//SNX5//PPP2CA//AKAP6//SMAD4//LAMP2//HUWE1//UBE2G2//RHBDD1
GO:0046907	intracellular transport	Biological process	13	1503	45	23276	4.47384	3.34925e-06	0.0101583	5.47505	0.288889	STX8//SNX5//ATP9A//ATP9B//SETD2//HIF1A//PPP2CA//AKAP6//SMAD4//LAMP2//HUWE1//UBE2G2//RHBDD1
GO:0034613	cellular protein localization	Biological process	12	1374	45	23276	4.51742	7.94513e-06	0.0120844	5.0999	0.266667	STX8//SNX5//AKAP6//PPP2CA//MORC3//RALGAPA2//SMAD4//LAMP2//ATP9B//HUWE1//UBE2G2//RHBDD1
GO:0070727	cellular macromolecule localization	Biological process	12	1382	45	23276	4.49127	8.42805e-06	0.0120844	5.07427	0.266667	STX8//SNX5//AKAP6//PPP2CA//MORC3//RALGAPA2//SMAD4//LAMP2//ATP9B//HUWE1//UBE2G2//RHBDD1
GO:0016482	cytoplasmic transport	Biological process	10	943	45	23276	5.48509	9.96079e-06	0.0120844	5.00171	0.222222	STX8//SETD2//SNX5//PPP2CA//AKAP6//SMAD4//LAMP2//HUWE1//UBE2G2//RHBDD1
GO:0006886	intracellular protein transport	Biological process	9	840	45	23276	5.5419	2.74101e-05	0.0277116	4.56209	0.2	PPP2CA//AKAP6//SMAD4//LAMP2//HUWE1//UBE2G2//RHBDD1//STX8//SNX5
GO:0033036	macromolecule localization	Biological process	15	2518	45	23276	3.08128	4.548e-05	0.0394116	4.34218	0.333333	STX8//SNX5//SETD2//ATP9A//ATP9B//RALGAPA2//AKAP6//HIF1A//PPP2CA//MORC3//SMAD4//LAMP2//HUWE1//UBE2G2//RHBDD1
GO:1903827	regulation of cellular protein localization	Biological process	7	518	45	23276	6.98979	5.66282e-05	0.0429383	4.24697	0.155556	PPP2CA//AKAP6//RALGAPA2//SMAD4//STX8//HUWE1//UBE2G2
GO:0051641	cellular localization	Biological process	15	2631	45	23276	2.94894	7.57745e-05	0.051072	4.12048	0.333333	STX8//SNX5//ATP9A//ATP9B//SETD2//SMAD4//HIF1A//AKAP6//PPP2CA//MORC3//RALGAPA2//LAMP2//HUWE1//UBE2G2//RHBDD1
GO:1903649	regulation of cytoplasmic transport	Biological process	6	426	45	23276	7.28513	0.000161538	0.0979887	3.79173	0.133333	SETD2//PPP2CA//AKAP6//SMAD4//HUWE1//UBE2G2
GO:0051649	establishment of localization in cell	Biological process	13	2190	45	23276	3.0704	0.000178781	0.0985898	3.74768	0.288889	STX8//SNX5//ATP9A//ATP9B//SETD2//SMAD4//HIF1A//PPP2CA//AKAP6//LAMP2//HUWE1//UBE2G2//RHBDD1
GO:0008104	protein localization	Biological process	13	2222	45	23276	3.02618	0.000206712	0.104493	3.68464	0.288889	STX8//SNX5//RALGAPA2//AKAP6//HIF1A//PPP2CA//MORC3//SMAD4//LAMP2//ATP9B//HUWE1//UBE2G2//RHBDD1
GO:0071702	organic substance transport	Biological process	13	2304	45	23276	2.91848	0.000296162	0.122875	3.52847	0.288889	STX8//SNX5//SETD2//ATP9A//ATP9B//HIF1A//PPP2CA//AKAP6//SMAD4//LAMP2//HUWE1//UBE2G2//RHBDD1
GO:0032516	positive regulation of phosphoprotein phosphatase activity	Biological process	2	14	45	23276	73.8921	0.00032771	0.122875	3.48451	0.0444444	AKAP6//PPP2CA
GO:0019538	protein metabolic process	Biological process	20	4883	45	23276	2.11855	0.00034069	0.122875	3.46764	0.444444	UBE2G2//HUWE1//PPP2CA//AKAP6//CNOT6L//SNRK//MORC3//STK35//RPN1//MAN2A1//IDE//PAPPA//USP12//TASP1//RHBDD1//SETD2//SMAD4//HIF1A//YEATS2//GAREM
GO:0072594	establishment of protein localization to organelle	Biological process	6	497	45	23276	6.2444	0.000369598	0.122875	3.43227	0.133333	PPP2CA//AKAP6//SMAD4//LAMP2//ATP9B//HUWE1
GO:0032880	regulation of protein localization	Biological process	8	936	45	23276	4.42089	0.000380904	0.122875	3.41918	0.177778	HIF1A//PPP2CA//AKAP6//RALGAPA2//SMAD4//STX8//HUWE1//UBE2G2
GO:0006487	protein N-linked glycosylation	Biological process	3	73	45	23276	21.2566	0.000382061	0.122875	3.41787	0.0666667	MAN2A1//RPN1//UBE2G2
GO:0048864	stem cell development	Biological process	4	179	45	23276	11.5585	0.000393953	0.122875	3.40456	0.0888889	HIF1A//SMAD4//PPP2CA//SETD2
GO:0045184	establishment of protein localization	Biological process	11	1757	45	23276	3.2383	0.000405126	0.122875	3.39241	0.244444	STX8//SNX5//HIF1A//PPP2CA//AKAP6//SMAD4//LAMP2//ATP9B//HUWE1//UBE2G2//RHBDD1
GO:0009057	macromolecule catabolic process	Biological process	8	963	45	23276	4.29694	0.000460377	0.129557	3.33689	0.177778	HUWE1//CNOT6L//IDE//USP12//UBE2G2//RHBDD1//PPP2CA//SMAD4
GO:0033365	protein localization to organelle	Biological process	7	731	45	23276	4.95309	0.000469872	0.129557	3.32802	0.155556	PPP2CA//MORC3//AKAP6//SMAD4//LAMP2//ATP9B//HUWE1
GO:0060341	regulation of cellular localization	Biological process	9	1248	45	23276	3.73013	0.000547826	0.132316	3.26136	0.2	SETD2//SMAD4//HIF1A//PPP2CA//AKAP6//RALGAPA2//STX8//HUWE1//UBE2G2
GO:0046716	muscle cell cellular homeostasis	Biological process	2	18	45	23276	57.4716	0.00054828	0.132316	3.261	0.0444444	HIF1A//LAMP2
GO:0030163	protein catabolic process	Biological process	7	751	45	23276	4.82119	0.000551872	0.132316	3.25816	0.155556	HUWE1//IDE//USP12//UBE2G2//RHBDD1//PPP2CA//SMAD4
GO:0044260	cellular macromolecule metabolic process	Biological process	25	7237	45	23276	1.78681	0.000567132	0.132316	3.24632	0.555556	REV3L//ORC4//HIF1A//SMAD4//PPP2CA//YEATS2//SATB2//UBE2G2//HUWE1//CNOT6L//AKAP6//SETD2//CDYL//TDRD3//SNRK//MORC3//STK35//RPN1//MAN2A1//IDE//USP12//RHBDD1//TASP1//MLLT10//GAREM
GO:0033157	regulation of intracellular protein transport	Biological process	5	355	45	23276	7.28513	0.00059407	0.132572	3.22616	0.111111	PPP2CA//AKAP6//SMAD4//HUWE1//UBE2G2
GO:0016568	chromatin modification	Biological process	6	547	45	23276	5.67361	0.000612962	0.132572	3.21257	0.133333	SATB2//SETD2//HUWE1//YEATS2//SMAD4//TDRD3
GO:0046822	regulation of nucleocytoplasmic transport	Biological process	4	206	45	23276	10.0436	0.000668304	0.132572	3.17503	0.0888889	SETD2//PPP2CA//AKAP6//SMAD4
GO:0006464	cellular protein modification process	Biological process	15	3203	45	23276	2.42231	0.000677501	0.132572	3.16909	0.333333	UBE2G2//HUWE1//PPP2CA//AKAP6//SNRK//MORC3//STK35//RPN1//MAN2A1//SETD2//SMAD4//USP12//RHBDD1//YEATS2//GAREM
GO:0036211	protein modification process	Biological process	15	3203	45	23276	2.42231	0.000677501	0.132572	3.16909	0.333333	UBE2G2//HUWE1//PPP2CA//AKAP6//SNRK//MORC3//STK35//RPN1//MAN2A1//SETD2//SMAD4//USP12//RHBDD1//YEATS2//GAREM
GO:0032386	regulation of intracellular transport	Biological process	6	566	45	23276	5.48316	0.00073269	0.13889	3.13508	0.133333	SETD2//PPP2CA//AKAP6//SMAD4//HUWE1//UBE2G2
GO:0015031	protein transport	Biological process	10	1611	45	23276	3.2107	0.000836439	0.153753	3.07757	0.222222	STX8//SNX5//HIF1A//PPP2CA//AKAP6//SMAD4//LAMP2//HUWE1//UBE2G2//RHBDD1
GO:0001837	epithelial to mesenchymal transition	Biological process	3	103	45	23276	15.0654	0.00104332	0.174741	2.98158	0.0666667	SMAD4//PPP2CA//HIF1A
GO:0043412	macromolecule modification	Biological process	15	3338	45	23276	2.32435	0.00104909	0.174741	2.97919	0.333333	UBE2G2//HUWE1//PPP2CA//AKAP6//SNRK//MORC3//STK35//RPN1//MAN2A1//SETD2//SMAD4//USP12//RHBDD1//YEATS2//GAREM
GO:0006890	retrograde vesicle-mediated transport, Golgi to ER	Biological process	2	25	45	23276	41.3796	0.00106585	0.174741	2.97231	0.0444444	ATP9A//ATP9B
GO:0071634	regulation of transforming growth factor beta production	Biological process	2	25	45	23276	41.3796	0.00106585	0.174741	2.97231	0.0444444	HIF1A//SMAD4
GO:0010922	positive regulation of phosphatase activity	Biological process	2	26	45	23276	39.788	0.00115325	0.175488	2.93808	0.0444444	AKAP6//PPP2CA
GO:0071604	transforming growth factor beta production	Biological process	2	26	45	23276	39.788	0.00115325	0.175488	2.93808	0.0444444	HIF1A//SMAD4
GO:0043170	macromolecule metabolic process	Biological process	26	8031	45	23276	1.67456	0.00116246	0.175488	2.93462	0.577778	REV3L//ORC4//HIF1A//SMAD4//PPP2CA//YEATS2//SATB2//UBE2G2//HUWE1//CNOT6L//AKAP6//SETD2//CDYL//TDRD3//SNRK//MORC3//STK35//RPN1//MAN2A1//IDE//PAPPA//USP12//TASP1//RHBDD1//MLLT10//GAREM
GO:0007498	mesoderm development	Biological process	3	109	45	23276	14.2361	0.00122853	0.175488	2.91062	0.0666667	SETD2//SMAD4//PPP2CA
GO:0018279	protein N-linked glycosylation via asparagine	Biological process	2	27	45	23276	38.3144	0.00124398	0.175488	2.90519	0.0444444	RPN1//UBE2G2
GO:0030970	retrograde protein transport, ER to cytosol	Biological process	2	27	45	23276	38.3144	0.00124398	0.175488	2.90519	0.0444444	UBE2G2//RHBDD1
GO:0018196	peptidyl-asparagine modification	Biological process	2	28	45	23276	36.946	0.00133802	0.184465	2.87354	0.0444444	RPN1//UBE2G2
GO:0034629	cellular protein complex localization	Biological process	2	29	45	23276	35.672	0.00143537	0.193488	2.84304	0.0444444	RALGAPA2//AKAP6
GO:0044267	cellular protein metabolic process	Biological process	17	4217	45	23276	2.08517	0.00147673	0.194736	2.8307	0.377778	UBE2G2//HUWE1//PPP2CA//AKAP6//CNOT6L//SNRK//MORC3//STK35//RPN1//MAN2A1//IDE//USP12//SETD2//SMAD4//RHBDD1//YEATS2//GAREM
GO:0006325	chromatin organization	Biological process	6	677	45	23276	4.58415	0.00183649	0.237024	2.73601	0.133333	SETD2//SATB2//TDRD3//HUWE1//YEATS2//SMAD4
GO:1901575	organic substance catabolic process	Biological process	9	1500	45	23276	3.10347	0.00200682	0.253331	2.69749	0.2	HUWE1//CNOT6L//HIF1A//IDE//USP12//UBE2G2//RHBDD1//PPP2CA//SMAD4
GO:0006879	cellular iron ion homeostasis	Biological process	2	35	45	23276	29.5568	0.00208812	0.253331	2.68024	0.0444444	HIF1A//SMAD4
GO:0032527	protein exit from endoplasmic reticulum	Biological process	2	35	45	23276	29.5568	0.00208812	0.253331	2.68024	0.0444444	UBE2G2//RHBDD1
GO:1903533	regulation of protein targeting	Biological process	4	284	45	23276	7.28513	0.00218178	0.259503	2.66119	0.0888889	PPP2CA//AKAP6//SMAD4//HUWE1
GO:1902578	single-organism localization	Biological process	15	3602	45	23276	2.15399	0.00229578	0.267811	2.63907	0.333333	ANO10//ATP9A//ATP9B//HIF1A//STX8//SETD2//SMAD4//SNX5//PPP2CA//RHBDD1//AKAP6//MORC3//LAMP2//HUWE1//UBE2G2
GO:0048863	stem cell differentiation	Biological process	4	295	45	23276	7.01348	0.00250314	0.277392	2.60152	0.0888889	HIF1A//SMAD4//PPP2CA//SETD2
GO:0009100	glycoprotein metabolic process	Biological process	4	296	45	23276	6.98979	0.00253388	0.277392	2.59621	0.0888889	RPN1//MAN2A1//UBE2G2//HIF1A
GO:0006996	organelle organization	Biological process	14	3262	45	23276	2.21993	0.00255223	0.277392	2.59308	0.311111	SETD2//ARHGAP26//MAN2A1//STX8//SATB2//STAG1//CNOT6L//SNX5//TDRD3//HUWE1//MKLN1//YEATS2//SMAD4//HIF1A
GO:0051223	regulation of protein transport	Biological process	6	724	45	23276	4.28656	0.00257102	0.277392	2.58989	0.133333	HIF1A//PPP2CA//AKAP6//SMAD4//HUWE1//UBE2G2
GO:0019725	cellular homeostasis	Biological process	6	726	45	23276	4.27475	0.00260656	0.277392	2.58393	0.133333	HIF1A//SMAD4//IDE//LAMP2//AKAP6//PPP2CA
GO:0035307	positive regulation of protein dephosphorylation	Biological process	2	44	45	23276	23.5111	0.00328348	0.331914	2.48367	0.0444444	AKAP6//PPP2CA
GO:0044238	primary metabolic process	Biological process	27	9063	45	23276	1.54095	0.00337993	0.331914	2.47109	0.6	REV3L//ORC4//HIF1A//SMAD4//PPP2CA//YEATS2//SATB2//UBE2G2//HUWE1//CNOT6L//AKAP6//MAN2A1//SETD2//CDYL//TDRD3//SNRK//MORC3//STK35//RPN1//IDE//PAPPA//USP12//TASP1//RHBDD1//ETNK1//MLLT10//GAREM
GO:0035306	positive regulation of dephosphorylation	Biological process	2	45	45	23276	22.9886	0.00343199	0.331914	2.46445	0.0444444	AKAP6//PPP2CA
GO:0043666	regulation of phosphoprotein phosphatase activity	Biological process	2	45	45	23276	22.9886	0.00343199	0.331914	2.46445	0.0444444	AKAP6//PPP2CA
GO:1903513	endoplasmic reticulum to cytosol transport	Biological process	2	45	45	23276	22.9886	0.00343199	0.331914	2.46445	0.0444444	UBE2G2//RHBDD1
GO:1902580	single-organism cellular localization	Biological process	7	1033	45	23276	3.50504	0.00344718	0.331914	2.46254	0.155556	HIF1A//PPP2CA//AKAP6//SMAD4//LAMP2//STX8//HUWE1
GO:0070201	regulation of establishment of protein localization	Biological process	6	781	45	23276	3.97371	0.00373745	0.349471	2.42742	0.133333	HIF1A//PPP2CA//AKAP6//SMAD4//HUWE1//UBE2G2
GO:0006605	protein targeting	Biological process	5	541	45	23276	4.78045	0.0037805	0.349471	2.42245	0.111111	PPP2CA//AKAP6//SMAD4//LAMP2//HUWE1
GO:0042176	regulation of protein catabolic process	Biological process	4	332	45	23276	6.23186	0.00382179	0.349471	2.41773	0.0888889	SMAD4//RHBDD1//UBE2G2//PPP2CA
GO:0044765	single-organism transport	Biological process	14	3409	45	23276	2.12421	0.00385997	0.349471	2.41342	0.311111	ANO10//ATP9A//ATP9B//HIF1A//STX8//SETD2//SMAD4//SNX5//PPP2CA//RHBDD1//AKAP6//LAMP2//HUWE1//UBE2G2
GO:0044249	cellular biosynthetic process	Biological process	18	5048	45	23276	1.84437	0.00417403	0.372348	2.37944	0.4	REV3L//ORC4//HIF1A//SMAD4//PPP2CA//YEATS2//SATB2//CDYL//CNOT6L//SETD2//RPN1//MAN2A1//ETNK1//TASP1//UBE2G2//AKAP6//MLLT10//TDRD3
GO:0042306	regulation of protein import into nucleus	Biological process	3	170	45	23276	9.12784	0.00433712	0.378407	2.3628	0.0666667	PPP2CA//AKAP6//SMAD4
GO:0015914	phospholipid transport	Biological process	2	51	45	23276	20.2841	0.0043876	0.378407	2.35777	0.0444444	ATP9A//ATP9B
GO:0034504	protein localization to nucleus	Biological process	4	347	45	23276	5.96247	0.00446963	0.378407	2.34973	0.0888889	PPP2CA//MORC3//AKAP6//SMAD4
GO:0014031	mesenchymal cell development	Biological process	3	173	45	23276	8.96956	0.00455386	0.378407	2.34162	0.0666667	HIF1A//SMAD4//PPP2CA
GO:1904589	regulation of protein import	Biological process	3	173	45	23276	8.96956	0.00455386	0.378407	2.34162	0.0666667	PPP2CA//AKAP6//SMAD4
GO:0009059	macromolecule biosynthetic process	Biological process	16	4317	45	23276	1.91705	0.00520993	0.427074	2.28317	0.355556	REV3L//ORC4//HIF1A//SMAD4//PPP2CA//YEATS2//SATB2//CDYL//CNOT6L//SETD2//RPN1//MAN2A1//TASP1//UBE2G2//MLLT10//TDRD3
GO:1901576	organic substance biosynthetic process	Biological process	18	5160	45	23276	1.80434	0.00533421	0.431431	2.27293	0.4	REV3L//ORC4//HIF1A//SMAD4//PPP2CA//YEATS2//SATB2//CDYL//CNOT6L//SETD2//RPN1//MAN2A1//ETNK1//TASP1//UBE2G2//AKAP6//MLLT10//TDRD3
GO:0007041	lysosomal transport	Biological process	2	57	45	23276	18.1489	0.00545204	0.435159	2.26344	0.0444444	STX8//LAMP2
GO:0048762	mesenchymal cell differentiation	Biological process	3	187	45	23276	8.29804	0.00565181	0.445245	2.24781	0.0666667	HIF1A//SMAD4//PPP2CA
GO:0006913	nucleocytoplasmic transport	Biological process	4	373	45	23276	5.54686	0.00576165	0.445649	2.23945	0.0888889	SETD2//PPP2CA//AKAP6//SMAD4
GO:1901019	regulation of calcium ion transmembrane transporter activity	Biological process	2	59	45	23276	17.5337	0.0058306	0.445649	2.23429	0.0444444	AKAP6//PPP2CA
GO:0051169	nuclear transport	Biological process	4	377	45	23276	5.488	0.00598036	0.445649	2.22327	0.0888889	SETD2//PPP2CA//AKAP6//SMAD4
GO:0044237	cellular metabolic process	Biological process	26	8893	45	23276	1.51224	0.00599714	0.445649	2.22206	0.577778	REV3L//ORC4//HIF1A//SMAD4//PPP2CA//YEATS2//SATB2//UBE2G2//HUWE1//CNOT6L//AKAP6//SETD2//CDYL//TDRD3//SNRK//MORC3//STK35//RPN1//MAN2A1//IDE//USP12//ETNK1//RHBDD1//TASP1//MLLT10//GAREM
GO:0009880	embryonic pattern specification	Biological process	2	60	45	23276	17.2415	0.00602427	0.445649	2.2201	0.0444444	SMAD4//SATB2
GO:0043966	histone H3 acetylation	Biological process	2	61	45	23276	16.9588	0.00622087	0.447513	2.20615	0.0444444	SMAD4//YEATS2
GO:0009058	biosynthetic process	Biological process	18	5236	45	23276	1.77815	0.00626719	0.447513	2.20293	0.4	REV3L//ORC4//HIF1A//SMAD4//PPP2CA//YEATS2//SATB2//CDYL//CNOT6L//SETD2//RPN1//MAN2A1//ETNK1//TASP1//UBE2G2//AKAP6//MLLT10//TDRD3
GO:0006486	protein glycosylation	Biological process	3	195	45	23276	7.95761	0.00634456	0.447513	2.1976	0.0666667	MAN2A1//RPN1//UBE2G2
GO:0043413	macromolecule glycosylation	Biological process	3	195	45	23276	7.95761	0.00634456	0.447513	2.1976	0.0666667	RPN1//MAN2A1//UBE2G2
GO:0016570	histone modification	Biological process	4	386	45	23276	5.36005	0.0064926	0.449024	2.18758	0.0888889	SETD2//HUWE1//YEATS2//SMAD4
GO:0031327	negative regulation of cellular biosynthetic process	Biological process	8	1467	45	23276	2.82069	0.00651403	0.449024	2.18615	0.177778	HIF1A//SMAD4//PPP2CA//YEATS2//SATB2//AKAP6//CNOT6L//CDYL
GO:0009894	regulation of catabolic process	Biological process	5	619	45	23276	4.17806	0.00664876	0.453162	2.17726	0.111111	HIF1A//PPP2CA//SMAD4//RHBDD1//UBE2G2
GO:0010717	regulation of epithelial to mesenchymal transition	Biological process	2	65	45	23276	15.9152	0.0070362	0.468963	2.15266	0.0444444	SMAD4//PPP2CA
GO:0016569	covalent chromatin modification	Biological process	4	396	45	23276	5.22469	0.00709518	0.468963	2.14904	0.0888889	SETD2//HUWE1//YEATS2//SMAD4
GO:0009056	catabolic process	Biological process	9	1815	45	23276	2.56485	0.00711253	0.468963	2.14798	0.2	HUWE1//CNOT6L//HIF1A//IDE//USP12//UBE2G2//RHBDD1//PPP2CA//SMAD4
GO:0009890	negative regulation of biosynthetic process	Biological process	8	1496	45	23276	2.76601	0.00730772	0.472478	2.13622	0.177778	HIF1A//SMAD4//PPP2CA//YEATS2//SATB2//AKAP6//CNOT6L//CDYL
GO:0071704	organic substance metabolic process	Biological process	27	9508	45	23276	1.46883	0.00732161	0.472478	2.13539	0.6	REV3L//ORC4//HIF1A//SMAD4//PPP2CA//YEATS2//SATB2//UBE2G2//HUWE1//CNOT6L//AKAP6//MAN2A1//SETD2//CDYL//TDRD3//SNRK//MORC3//STK35//RPN1//IDE//PAPPA//USP12//TASP1//RHBDD1//ETNK1//MLLT10//GAREM
GO:0006508	proteolysis	Biological process	8	1503	45	23276	2.75313	0.00750991	0.478613	2.12437	0.177778	HUWE1//IDE//USP12//RHBDD1//UBE2G2//PPP2CA//PAPPA//TASP1
GO:0070085	glycosylation	Biological process	3	208	45	23276	7.46026	0.00757449	0.478613	2.12065	0.0666667	RPN1//MAN2A1//UBE2G2
GO:0051172	negative regulation of nitrogen compound metabolic process	Biological process	8	1510	45	23276	2.74037	0.00771635	0.482551	2.11259	0.177778	HIF1A//SMAD4//PPP2CA//YEATS2//SATB2//AKAP6//CNOT6L//CDYL
GO:0055072	iron ion homeostasis	Biological process	2	69	45	23276	14.9926	0.00789731	0.488827	2.10252	0.0444444	HIF1A//SMAD4
GO:0015748	organophosphate ester transport	Biological process	2	70	45	23276	14.7784	0.00811965	0.491674	2.09046	0.0444444	ATP9A//ATP9B
GO:0046916	cellular transition metal ion homeostasis	Biological process	2	70	45	23276	14.7784	0.00811965	0.491674	2.09046	0.0444444	HIF1A//SMAD4
GO:1900180	regulation of protein localization to nucleus	Biological process	3	214	45	23276	7.25109	0.00818646	0.491674	2.0869	0.0666667	PPP2CA//AKAP6//SMAD4
GO:0001701	in utero embryonic development	Biological process	4	435	45	23276	4.75627	0.00979774	0.576114	2.00887	0.0888889	HIF1A//SETD2//SMAD4//MAN2A1
GO:0008152	metabolic process	Biological process	28	10196	45	23276	1.42044	0.00980166	0.576114	2.0087	0.622222	REV3L//ORC4//HIF1A//SMAD4//PPP2CA//YEATS2//SATB2//UBE2G2//HUWE1//CNOT6L//AKAP6//MAN2A1//SETD2//CDYL//TDRD3//SNRK//MORC3//STK35//RPN1//IDE//PAPPA//USP12//TASP1//RHBDD1//ETNK1//MLLT10//GAREM//RALGAPA2
GO:0034645	cellular macromolecule biosynthetic process	Biological process	15	4191	45	23276	1.85127	0.00987733	0.576114	2.00536	0.333333	REV3L//ORC4//HIF1A//SMAD4//PPP2CA//YEATS2//SATB2//CDYL//CNOT6L//SETD2//RPN1//MAN2A1//TASP1//UBE2G2//MLLT10
GO:0048663	neuron fate commitment	Biological process	2	78	45	23276	13.2627	0.00999843	0.577623	2.00007	0.0444444	SATB2//SMAD4
GO:0036503	ERAD pathway	Biological process	2	79	45	23276	13.0948	0.0102456	0.584675	1.98946	0.0444444	UBE2G2//RHBDD1
GO:0060485	mesenchyme development	Biological process	3	233	45	23276	6.6598	0.0103133	0.584675	1.9866	0.0666667	HIF1A//SMAD4//PPP2CA
GO:0014033	neural crest cell differentiation	Biological process	2	81	45	23276	12.7715	0.0107481	0.59823	1.96867	0.0444444	HIF1A//SMAD4
GO:0051276	chromosome organization	Biological process	6	977	45	23276	3.17653	0.0108427	0.59823	1.96486	0.133333	SETD2//SATB2//TDRD3//HUWE1//YEATS2//SMAD4
GO:0018193	peptidyl-amino acid modification	Biological process	6	979	45	23276	3.17004	0.0109454	0.59823	1.96077	0.133333	SETD2//MORC3//RPN1//UBE2G2//YEATS2//SMAD4
GO:0043009	chordate embryonic development	Biological process	5	700	45	23276	3.6946	0.0109776	0.59823	1.95949	0.111111	SMAD4//MAN2A1//SETD2//HIF1A//SATB2
GO:0090316	positive regulation of intracellular protein transport	Biological process	3	239	45	23276	6.49261	0.0110455	0.59823	1.95682	0.0666667	AKAP6//SMAD4//HUWE1
GO:0007034	vacuolar transport	Biological process	2	83	45	23276	12.4637	0.0112613	0.604522	1.94841	0.0444444	STX8//LAMP2
GO:0009792	embryo development ending in birth or egg hatching	Biological process	5	707	45	23276	3.65802	0.0114249	0.607754	1.94215	0.111111	SMAD4//MAN2A1//SETD2//HIF1A//SATB2
GO:0042990	regulation of transcription factor import into nucleus	Biological process	2	84	45	23276	12.3153	0.0115219	0.607754	1.93848	0.0444444	PPP2CA//AKAP6
GO:0051222	positive regulation of protein transport	Biological process	4	459	45	23276	4.50758	0.011755	0.614706	1.92978	0.0888889	HIF1A//AKAP6//SMAD4//HUWE1
GO:0016310	phosphorylation	Biological process	9	1979	45	23276	2.3523	0.0122387	0.627986	1.91226	0.2	PPP2CA//AKAP6//HIF1A//SNRK//MORC3//STK35//SMAD4//GAREM//ETNK1
GO:0034654	nucleobase-containing compound biosynthetic process	Biological process	13	3479	45	23276	1.93279	0.0122484	0.627986	1.91192	0.288889	HIF1A//SMAD4//PPP2CA//YEATS2//SATB2//CDYL//CNOT6L//SETD2//TASP1//REV3L//AKAP6//MLLT10//TDRD3
GO:0042991	transcription factor import into nucleus	Biological process	2	87	45	23276	11.8907	0.0123195	0.627986	1.90941	0.0444444	PPP2CA//AKAP6
GO:0000122	negative regulation of transcription from RNA polymerase II promoter	Biological process	5	731	45	23276	3.53792	0.0130533	0.652794	1.88428	0.111111	HIF1A//SMAD4//PPP2CA//YEATS2//SATB2
GO:0060021	palate development	Biological process	2	90	45	23276	11.4943	0.0131408	0.652794	1.88138	0.0444444	SMAD4//SATB2
GO:0090317	negative regulation of intracellular protein transport	Biological process	2	91	45	23276	11.368	0.0134197	0.652794	1.87226	0.0444444	PPP2CA//UBE2G2
GO:0009101	glycoprotein biosynthetic process	Biological process	3	257	45	23276	6.03787	0.0134197	0.652794	1.87226	0.0666667	RPN1//MAN2A1//UBE2G2
GO:0032879	regulation of localization	Biological process	10	2370	45	23276	2.18247	0.013469	0.652794	1.87066	0.222222	HIF1A//SETD2//SMAD4//RALGAPA2//PPP2CA//RHBDD1//AKAP6//STX8//HUWE1//UBE2G2
GO:0045934	negative regulation of nucleobase-containing compound metabolic process	Biological process	7	1336	45	23276	2.71011	0.0135213	0.652794	1.86898	0.155556	HIF1A//SMAD4//PPP2CA//YEATS2//SATB2//AKAP6//CDYL
GO:1903651	positive regulation of cytoplasmic transport	Biological process	3	258	45	23276	6.01447	0.0135595	0.652794	1.86776	0.0666667	AKAP6//SMAD4//HUWE1
GO:0006606	protein import into nucleus	Biological process	3	261	45	23276	5.94534	0.0139839	0.65641	1.85437	0.0666667	PPP2CA//AKAP6//SMAD4
GO:0044744	protein targeting to nucleus	Biological process	3	261	45	23276	5.94534	0.0139839	0.65641	1.85437	0.0666667	PPP2CA//AKAP6//SMAD4
GO:1902593	single-organism nuclear import	Biological process	3	261	45	23276	5.94534	0.0139839	0.65641	1.85437	0.0666667	PPP2CA//AKAP6//SMAD4
GO:0051170	nuclear import	Biological process	3	262	45	23276	5.92265	0.014127	0.65641	1.84995	0.0666667	PPP2CA//AKAP6//SMAD4
GO:0018130	heterocycle biosynthetic process	Biological process	13	3543	45	23276	1.89788	0.0141757	0.65641	1.84846	0.288889	HIF1A//SMAD4//PPP2CA//YEATS2//SATB2//CDYL//CNOT6L//SETD2//TASP1//REV3L//AKAP6//MLLT10//TDRD3
GO:0019438	aromatic compound biosynthetic process	Biological process	13	3551	45	23276	1.8936	0.0144325	0.663239	1.84066	0.288889	HIF1A//SMAD4//PPP2CA//YEATS2//SATB2//CDYL//CNOT6L//SETD2//TASP1//REV3L//AKAP6//MLLT10//TDRD3
GO:0034968	histone lysine methylation	Biological process	2	96	45	23276	10.7759	0.0148528	0.666393	1.82819	0.0444444	SETD2//SMAD4
GO:1904951	positive regulation of establishment of protein localization	Biological process	4	494	45	23276	4.18821	0.0150364	0.666393	1.82286	0.0888889	HIF1A//AKAP6//SMAD4//HUWE1
GO:0009987	cellular process	Biological process	36	14885	45	23276	1.25098	0.0154222	0.666393	1.81185	0.8	REV3L//ORC4//STAG1//HIF1A//SMAD4//PPP2CA//YEATS2//SATB2//UBE2G2//HUWE1//CNOT6L//SETD2//AKAP6//ARHGAP26//RHBDD1//ADGRE1//SNRK//MAN2A1//STX8//CDYL//TDRD3//MORC3//STK35//RPN1//IDE//USP12//ETNK1//GAREM//TPD52//MKLN1//SNX5//TASP1//RALGAPA2//MLLT10//LAMP2//ANO10
GO:0042307	positive regulation of protein import into nucleus	Biological process	2	98	45	23276	10.556	0.0154438	0.666393	1.81125	0.0444444	AKAP6//SMAD4
GO:0051179	localization	Biological process	17	5263	45	23276	1.67075	0.0154859	0.666393	1.81006	0.377778	HIF1A//SATB2//STX8//SNX5//ANO10//ATP9A//ATP9B//SETD2//SMAD4//RALGAPA2//AKAP6//PPP2CA//RHBDD1//MORC3//LAMP2//HUWE1//UBE2G2
GO:0051049	regulation of transport	Biological process	8	1711	45	23276	2.41844	0.0157025	0.666393	1.80403	0.177778	SETD2//SMAD4//HIF1A//PPP2CA//RHBDD1//AKAP6//HUWE1//UBE2G2
GO:1904591	positive regulation of protein import	Biological process	2	101	45	23276	10.2425	0.016349	0.666393	1.78651	0.0444444	AKAP6//SMAD4
GO:0044265	cellular macromolecule catabolic process	Biological process	5	778	45	23276	3.32419	0.016687	0.666393	1.77762	0.111111	HUWE1//CNOT6L//IDE//USP12//UBE2G2
GO:0048704	embryonic skeletal system morphogenesis	Biological process	2	103	45	23276	10.0436	0.0169648	0.666393	1.77045	0.0444444	SETD2//SATB2
GO:0018022	peptidyl-lysine methylation	Biological process	2	104	45	23276	9.94701	0.0172764	0.666393	1.76255	0.0444444	SETD2//SMAD4
GO:0001892	embryonic placenta development	Biological process	2	105	45	23276	9.85228	0.0175905	0.666393	1.75472	0.0444444	SETD2//HIF1A
GO:0010469	regulation of receptor activity	Biological process	2	105	45	23276	9.85228	0.0175905	0.666393	1.75472	0.0444444	AKAP6//PPP2CA
GO:0055076	transition metal ion homeostasis	Biological process	2	105	45	23276	9.85228	0.0175905	0.666393	1.75472	0.0444444	HIF1A//SMAD4
GO:1903650	negative regulation of cytoplasmic transport	Biological process	2	105	45	23276	9.85228	0.0175905	0.666393	1.75472	0.0444444	PPP2CA//UBE2G2
GO:0016043	cellular component organization	Biological process	17	5340	45	23276	1.64666	0.0178199	0.666393	1.74909	0.377778	HIF1A//SMAD4//SETD2//ARHGAP26//MAN2A1//STX8//SATB2//STAG1//MKLN1//CNOT6L//PPP2CA//SNX5//TDRD3//HUWE1//AKAP6//IDE//YEATS2
GO:0006810	transport	Biological process	14	4058	45	23276	1.78448	0.0178228	0.666393	1.74902	0.311111	STX8//ANO10//SNX5//ATP9A//ATP9B//HIF1A//SETD2//SMAD4//PPP2CA//RHBDD1//AKAP6//LAMP2//HUWE1//UBE2G2
GO:0071333	cellular response to glucose stimulus	Biological process	2	106	45	23276	9.75933	0.017907	0.666393	1.74698	0.0444444	HIF1A//PPP2CA
GO:0010558	negative regulation of macromolecule biosynthetic process	Biological process	7	1415	45	23276	2.55881	0.0180462	0.666393	1.74362	0.155556	HIF1A//SMAD4//PPP2CA//YEATS2//SATB2//CNOT6L//CDYL
GO:1901362	organic cyclic compound biosynthetic process	Biological process	13	3659	45	23276	1.83771	0.01827	0.666393	1.73826	0.288889	HIF1A//SMAD4//PPP2CA//YEATS2//SATB2//CDYL//CNOT6L//SETD2//TASP1//REV3L//AKAP6//MLLT10//TDRD3
GO:0014020	primary neural tube formation	Biological process	2	108	45	23276	9.5786	0.0185472	0.666393	1.73172	0.0444444	SETD2//HIF1A
GO:0071326	cellular response to monosaccharide stimulus	Biological process	2	108	45	23276	9.5786	0.0185472	0.666393	1.73172	0.0444444	HIF1A//PPP2CA
GO:0071331	cellular response to hexose stimulus	Biological process	2	108	45	23276	9.5786	0.0185472	0.666393	1.73172	0.0444444	HIF1A//PPP2CA
GO:0031503	protein complex localization	Biological process	2	109	45	23276	9.49072	0.0188709	0.666393	1.72421	0.0444444	AKAP6//RALGAPA2
GO:0010870	positive regulation of receptor biosynthetic process	Biological process	1	10	45	23276	51.7244	0.0191696	0.666393	1.71739	0.0222222	HIF1A
GO:0034643	establishment of mitochondrion localization, microtubule-mediated	Biological process	1	10	45	23276	51.7244	0.0191696	0.666393	1.71739	0.0222222	HIF1A
GO:0043619	regulation of transcription from RNA polymerase II promoter in response to oxidative stress	Biological process	1	10	45	23276	51.7244	0.0191696	0.666393	1.71739	0.0222222	HIF1A
GO:0046884	follicle-stimulating hormone secretion	Biological process	1	10	45	23276	51.7244	0.0191696	0.666393	1.71739	0.0222222	SMAD4
GO:0047497	mitochondrion transport along microtubule	Biological process	1	10	45	23276	51.7244	0.0191696	0.666393	1.71739	0.0222222	HIF1A
GO:0051533	positive regulation of NFAT protein import into nucleus	Biological process	1	10	45	23276	51.7244	0.0191696	0.666393	1.71739	0.0222222	AKAP6
GO:0070244	negative regulation of thymocyte apoptotic process	Biological process	1	10	45	23276	51.7244	0.0191696	0.666393	1.71739	0.0222222	HIF1A
GO:0070886	positive regulation of calcineurin-NFAT signaling cascade	Biological process	1	10	45	23276	51.7244	0.0191696	0.666393	1.71739	0.0222222	AKAP6
GO:1903204	negative regulation of oxidative stress-induced neuron death	Biological process	1	10	45	23276	51.7244	0.0191696	0.666393	1.71739	0.0222222	HIF1A
GO:0046824	positive regulation of nucleocytoplasmic transport	Biological process	2	113	45	23276	9.15477	0.0201895	0.666393	1.69487	0.0444444	AKAP6//SMAD4
GO:0071322	cellular response to carbohydrate stimulus	Biological process	2	113	45	23276	9.15477	0.0201895	0.666393	1.69487	0.0444444	HIF1A//PPP2CA
GO:0018205	peptidyl-lysine modification	Biological process	3	301	45	23276	5.15526	0.020368	0.666393	1.69105	0.0666667	SETD2//YEATS2//SMAD4
GO:0010921	regulation of phosphatase activity	Biological process	2	114	45	23276	9.07446	0.0205251	0.666393	1.68771	0.0444444	AKAP6//PPP2CA
GO:1903169	regulation of calcium ion transmembrane transport	Biological process	2	115	45	23276	8.99556	0.020863	0.666393	1.68062	0.0444444	AKAP6//PPP2CA
GO:0008284	positive regulation of cell proliferation	Biological process	5	825	45	23276	3.13481	0.0209453	0.666393	1.67891	0.111111	HIF1A//SMAD4//TPD52//CNOT6L//GAREM
GO:0007507	heart development	Biological process	4	547	45	23276	3.78241	0.0210252	0.666393	1.67726	0.0888889	HIF1A//SMAD4//SETD2//AKAP6
GO:0003198	epithelial to mesenchymal transition involved in endocardial cushion formation	Biological process	1	11	45	23276	47.0222	0.0210666	0.666393	1.6764	0.0222222	SMAD4
GO:0032239	regulation of nucleobase-containing compound transport	Biological process	1	11	45	23276	47.0222	0.0210666	0.666393	1.6764	0.0222222	SETD2
GO:0045906	negative regulation of vasoconstriction	Biological process	1	11	45	23276	47.0222	0.0210666	0.666393	1.6764	0.0222222	HIF1A
GO:0046337	phosphatidylethanolamine metabolic process	Biological process	1	11	45	23276	47.0222	0.0210666	0.666393	1.6764	0.0222222	ETNK1
GO:0048733	sebaceous gland development	Biological process	1	11	45	23276	47.0222	0.0210666	0.666393	1.6764	0.0222222	SMAD4
GO:0070102	interleukin-6-mediated signaling pathway	Biological process	1	11	45	23276	47.0222	0.0210666	0.666393	1.6764	0.0222222	SMAD4
GO:0072075	metanephric mesenchyme development	Biological process	1	11	45	23276	47.0222	0.0210666	0.666393	1.6764	0.0222222	SMAD4
GO:1901077	regulation of relaxation of muscle	Biological process	1	11	45	23276	47.0222	0.0210666	0.666393	1.6764	0.0222222	AKAP6
GO:2000615	regulation of histone H3-K9 acetylation	Biological process	1	11	45	23276	47.0222	0.0210666	0.666393	1.6764	0.0222222	SMAD4
GO:2001054	negative regulation of mesenchymal cell apoptotic process	Biological process	1	11	45	23276	47.0222	0.0210666	0.666393	1.6764	0.0222222	HIF1A
GO:0048562	embryonic organ morphogenesis	Biological process	3	306	45	23276	5.07102	0.0212617	0.666393	1.6724	0.0666667	HIF1A//SETD2//SATB2
GO:0009892	negative regulation of metabolic process	Biological process	10	2546	45	23276	2.0316	0.0213924	0.666393	1.66974	0.222222	HIF1A//SMAD4//PPP2CA//YEATS2//SATB2//AKAP6//CNOT6L//IDE//CDYL//UBE2G2
GO:0010638	positive regulation of organelle organization	Biological process	4	550	45	23276	3.76178	0.0214023	0.666393	1.66954	0.0888889	CNOT6L//SMAD4//HIF1A//HUWE1
GO:0017038	protein import	Biological process	3	308	45	23276	5.0381	0.0216252	0.666393	1.66504	0.0666667	PPP2CA//AKAP6//SMAD4
GO:0071310	cellular response to organic substance	Biological process	8	1815	45	23276	2.27987	0.0216681	0.666393	1.66418	0.177778	SMAD4//HIF1A//RHBDD1//UBE2G2//AKAP6//PPP2CA//GAREM//SATB2
GO:0051128	regulation of cellular component organization	Biological process	9	2182	45	23276	2.13346	0.0219887	0.666393	1.6578	0.2	MKLN1//CNOT6L//SMAD4//PPP2CA//AKAP6//IDE//STX8//HIF1A//HUWE1
GO:0010720	positive regulation of cell development	Biological process	4	558	45	23276	3.70785	0.0224284	0.666393	1.6492	0.0888889	HIF1A//SMAD4//MAN2A1//AKAP6
GO:1903507	negative regulation of nucleic acid-templated transcription	Biological process	6	1150	45	23276	2.69867	0.0225369	0.666393	1.64711	0.133333	HIF1A//SMAD4//PPP2CA//YEATS2//SATB2//CDYL
GO:0001678	cellular glucose homeostasis	Biological process	2	120	45	23276	8.62074	0.0225873	0.666393	1.64614	0.0444444	HIF1A//PPP2CA
GO:0042177	negative regulation of protein catabolic process	Biological process	2	120	45	23276	8.62074	0.0225873	0.666393	1.64614	0.0444444	UBE2G2//SMAD4
GO:2000736	regulation of stem cell differentiation	Biological process	2	120	45	23276	8.62074	0.0225873	0.666393	1.64614	0.0444444	SMAD4//PPP2CA
GO:0071840	cellular component organization or biogenesis	Biological process	17	5480	45	23276	1.60459	0.0227784	0.666393	1.64248	0.377778	HIF1A//SMAD4//SETD2//ARHGAP26//MAN2A1//STX8//SATB2//STAG1//MKLN1//CNOT6L//PPP2CA//SNX5//TDRD3//HUWE1//AKAP6//IDE//YEATS2
GO:0003157	endocardium development	Biological process	1	12	45	23276	43.1037	0.0229601	0.666393	1.63903	0.0222222	SMAD4
GO:0006517	protein deglycosylation	Biological process	1	12	45	23276	43.1037	0.0229601	0.666393	1.63903	0.0222222	MAN2A1
GO:0006622	protein targeting to lysosome	Biological process	1	12	45	23276	43.1037	0.0229601	0.666393	1.63903	0.0222222	LAMP2
GO:0019985	translesion synthesis	Biological process	1	12	45	23276	43.1037	0.0229601	0.666393	1.63903	0.0222222	REV3L
GO:0032275	luteinizing hormone secretion	Biological process	1	12	45	23276	43.1037	0.0229601	0.666393	1.63903	0.0222222	SMAD4
GO:0042541	hemoglobin biosynthetic process	Biological process	1	12	45	23276	43.1037	0.0229601	0.666393	1.63903	0.0222222	HIF1A
GO:0043970	histone H3-K9 acetylation	Biological process	1	12	45	23276	43.1037	0.0229601	0.666393	1.63903	0.0222222	SMAD4
GO:0051601	exocyst localization	Biological process	1	12	45	23276	43.1037	0.0229601	0.666393	1.63903	0.0222222	RALGAPA2
GO:0055119	relaxation of cardiac muscle	Biological process	1	12	45	23276	43.1037	0.0229601	0.666393	1.63903	0.0222222	AKAP6
GO:0060391	positive regulation of SMAD protein import into nucleus	Biological process	1	12	45	23276	43.1037	0.0229601	0.666393	1.63903	0.0222222	SMAD4
GO:0061418	regulation of transcription from RNA polymerase II promoter in response to hypoxia	Biological process	1	12	45	23276	43.1037	0.0229601	0.666393	1.63903	0.0222222	HIF1A
GO:0061614	pri-miRNA transcription from RNA polymerase II promoter	Biological process	1	12	45	23276	43.1037	0.0229601	0.666393	1.63903	0.0222222	HIF1A
GO:0072600	establishment of protein localization to Golgi	Biological process	1	12	45	23276	43.1037	0.0229601	0.666393	1.63903	0.0222222	ATP9B
GO:1902893	regulation of pri-miRNA transcription from RNA polymerase II promoter	Biological process	1	12	45	23276	43.1037	0.0229601	0.666393	1.63903	0.0222222	HIF1A
GO:1904152	regulation of retrograde protein transport, ER to cytosol	Biological process	1	12	45	23276	43.1037	0.0229601	0.666393	1.63903	0.0222222	UBE2G2
GO:1904293	negative regulation of ERAD pathway	Biological process	1	12	45	23276	43.1037	0.0229601	0.666393	1.63903	0.0222222	UBE2G2
GO:0001841	neural tube formation	Biological process	2	122	45	23276	8.47942	0.0232931	0.668718	1.63277	0.0444444	SETD2//HIF1A
GO:0016571	histone methylation	Biological process	2	123	45	23276	8.41048	0.0236494	0.668718	1.62618	0.0444444	SETD2//SMAD4
GO:1902679	negative regulation of RNA biosynthetic process	Biological process	6	1163	45	23276	2.6685	0.0236665	0.668718	1.62587	0.133333	HIF1A//SMAD4//PPP2CA//YEATS2//SATB2//CDYL
GO:0051234	establishment of localization	Biological process	14	4203	45	23276	1.72292	0.0237161	0.668718	1.62496	0.311111	STX8//SNX5//ANO10//ATP9A//ATP9B//HIF1A//SETD2//SMAD4//PPP2CA//RHBDD1//AKAP6//LAMP2//HUWE1//UBE2G2
GO:0050821	protein stabilization	Biological process	2	124	45	23276	8.34265	0.0240079	0.668718	1.61965	0.0444444	LAMP2//MORC3
GO:0048593	camera-type eye morphogenesis	Biological process	2	125	45	23276	8.27591	0.0243687	0.668718	1.61317	0.0444444	MAN2A1//HIF1A
GO:1903829	positive regulation of cellular protein localization	Biological process	3	323	45	23276	4.80413	0.0244602	0.668718	1.61154	0.0666667	AKAP6//SMAD4//HUWE1
GO:0032276	regulation of gonadotropin secretion	Biological process	1	13	45	23276	39.788	0.02485	0.668718	1.60467	0.0222222	SMAD4
GO:0032525	somite rostral/caudal axis specification	Biological process	1	13	45	23276	39.788	0.02485	0.668718	1.60467	0.0222222	SMAD4
GO:0051654	establishment of mitochondrion localization	Biological process	1	13	45	23276	39.788	0.02485	0.668718	1.60467	0.0222222	HIF1A
GO:0060644	mammary gland epithelial cell differentiation	Biological process	1	13	45	23276	39.788	0.02485	0.668718	1.60467	0.0222222	HIF1A
GO:1900182	positive regulation of protein localization to nucleus	Biological process	2	127	45	23276	8.14558	0.025097	0.668718	1.60038	0.0444444	AKAP6//SMAD4
GO:0043933	macromolecular complex subunit organization	Biological process	9	2239	45	23276	2.07914	0.0255385	0.668718	1.5928	0.2	SETD2//SATB2//SMAD4//CNOT6L//TDRD3//HUWE1//IDE//YEATS2//PPP2CA
GO:0032388	positive regulation of intracellular transport	Biological process	3	329	45	23276	4.71651	0.0256482	0.668718	1.59094	0.0666667	AKAP6//SMAD4//HUWE1
GO:0044723	single-organism carbohydrate metabolic process	Biological process	4	583	45	23276	3.54885	0.025828	0.668718	1.58791	0.0888889	MAN2A1//HIF1A//RPN1//UBE2G2
GO:1901137	carbohydrate derivative biosynthetic process	Biological process	4	584	45	23276	3.54277	0.0259701	0.668718	1.58553	0.0888889	RPN1//MAN2A1//UBE2G2//AKAP6
GO:0051603	proteolysis involved in cellular protein catabolic process	Biological process	4	585	45	23276	3.53671	0.0261127	0.668718	1.58315	0.0888889	HUWE1//USP12//UBE2G2//IDE
GO:1903828	negative regulation of cellular protein localization	Biological process	2	131	45	23276	7.89686	0.02658	0.668718	1.57545	0.0444444	PPP2CA//UBE2G2
GO:0007183	SMAD protein complex assembly	Biological process	1	14	45	23276	36.946	0.0267364	0.668718	1.5729	0.0222222	SMAD4
GO:0021877	forebrain neuron fate commitment	Biological process	1	14	45	23276	36.946	0.0267364	0.668718	1.5729	0.0222222	SATB2
GO:0030949	positive regulation of vascular endothelial growth factor receptor signaling pathway	Biological process	1	14	45	23276	36.946	0.0267364	0.668718	1.5729	0.0222222	HIF1A
GO:0036475	neuron death in response to oxidative stress	Biological process	1	14	45	23276	36.946	0.0267364	0.668718	1.5729	0.0222222	HIF1A
GO:0046886	positive regulation of hormone biosynthetic process	Biological process	1	14	45	23276	36.946	0.0267364	0.668718	1.5729	0.0222222	HIF1A
GO:0051457	maintenance of protein location in nucleus	Biological process	1	14	45	23276	36.946	0.0267364	0.668718	1.5729	0.0222222	MORC3
GO:0060576	intestinal epithelial cell development	Biological process	1	14	45	23276	36.946	0.0267364	0.668718	1.5729	0.0222222	HIF1A
GO:0061157	mRNA destabilization	Biological process	1	14	45	23276	36.946	0.0267364	0.668718	1.5729	0.0222222	CNOT6L
GO:1903203	regulation of oxidative stress-induced neuron death	Biological process	1	14	45	23276	36.946	0.0267364	0.668718	1.5729	0.0222222	HIF1A
GO:2000479	regulation of cAMP-dependent protein kinase activity	Biological process	1	14	45	23276	36.946	0.0267364	0.668718	1.5729	0.0222222	AKAP6
GO:2001053	regulation of mesenchymal cell apoptotic process	Biological process	1	14	45	23276	36.946	0.0267364	0.668718	1.5729	0.0222222	HIF1A
GO:0032387	negative regulation of intracellular transport	Biological process	2	132	45	23276	7.83704	0.0269562	0.668718	1.56934	0.0444444	PPP2CA//UBE2G2
GO:0051253	negative regulation of RNA metabolic process	Biological process	6	1206	45	23276	2.57336	0.0276762	0.668718	1.55789	0.133333	HIF1A//SMAD4//PPP2CA//YEATS2//SATB2//CDYL
GO:0048706	embryonic skeletal system development	Biological process	2	134	45	23276	7.72007	0.0277151	0.668718	1.55728	0.0444444	SETD2//SATB2
GO:1903506	regulation of nucleic acid-templated transcription	Biological process	11	3051	45	23276	1.86486	0.0279175	0.668718	1.55412	0.244444	HIF1A//SMAD4//PPP2CA//YEATS2//SATB2//CDYL//CNOT6L//SETD2//TASP1//MLLT10//TDRD3
GO:0010822	positive regulation of mitochondrion organization	Biological process	2	135	45	23276	7.66288	0.0280978	0.668718	1.55133	0.0444444	HIF1A//HUWE1
GO:0090304	nucleic acid metabolic process	Biological process	14	4296	45	23276	1.68562	0.0282211	0.668718	1.54943	0.311111	REV3L//ORC4//HIF1A//SMAD4//PPP2CA//YEATS2//SATB2//CNOT6L//HUWE1//SETD2//CDYL//TDRD3//TASP1//MLLT10
GO:2001141	regulation of RNA biosynthetic process	Biological process	11	3058	45	23276	1.86059	0.0283422	0.668718	1.54757	0.244444	HIF1A//SMAD4//PPP2CA//YEATS2//SATB2//CDYL//CNOT6L//SETD2//TASP1//MLLT10//TDRD3
GO:0030900	forebrain development	Biological process	3	343	45	23276	4.524	0.0285398	0.668718	1.54455	0.0666667	SATB2//HIF1A//SETD2
GO:0048598	embryonic morphogenesis	Biological process	4	602	45	23276	3.43684	0.0286101	0.668718	1.54348	0.0888889	SMAD4//SETD2//HIF1A//SATB2
GO:0003188	heart valve formation	Biological process	1	15	45	23276	34.483	0.0286191	0.668718	1.54334	0.0222222	SMAD4
GO:0003272	endocardial cushion formation	Biological process	1	15	45	23276	34.483	0.0286191	0.668718	1.54334	0.0222222	SMAD4
GO:0018027	peptidyl-lysine dimethylation	Biological process	1	15	45	23276	34.483	0.0286191	0.668718	1.54334	0.0222222	SETD2
GO:0051571	positive regulation of histone H3-K4 methylation	Biological process	1	15	45	23276	34.483	0.0286191	0.668718	1.54334	0.0222222	SMAD4
GO:0060314	regulation of ryanodine-sensitive calcium-release channel activity	Biological process	1	15	45	23276	34.483	0.0286191	0.668718	1.54334	0.0222222	AKAP6
GO:0061050	regulation of cell growth involved in cardiac muscle cell development	Biological process	1	15	45	23276	34.483	0.0286191	0.668718	1.54334	0.0222222	AKAP6
GO:0072074	kidney mesenchyme development	Biological process	1	15	45	23276	34.483	0.0286191	0.668718	1.54334	0.0222222	SMAD4
GO:0097152	mesenchymal cell apoptotic process	Biological process	1	15	45	23276	34.483	0.0286191	0.668718	1.54334	0.0222222	HIF1A
GO:1901018	positive regulation of potassium ion transmembrane transporter activity	Biological process	1	15	45	23276	34.483	0.0286191	0.668718	1.54334	0.0222222	AKAP6
GO:0031324	negative regulation of cellular metabolic process	Biological process	9	2287	45	23276	2.03551	0.0288359	0.668718	1.54007	0.2	HIF1A//SMAD4//PPP2CA//YEATS2//SATB2//AKAP6//IDE//CNOT6L//CDYL
GO:0080090	regulation of primary metabolic process	Biological process	16	5177	45	23276	1.59859	0.0288687	0.668718	1.53957	0.355556	HIF1A//SMAD4//PPP2CA//YEATS2//SATB2//AKAP6//CDYL//CNOT6L//SETD2//RHBDD1//TASP1//IDE//MLLT10//GAREM//TDRD3//UBE2G2
GO:0035304	regulation of protein dephosphorylation	Biological process	2	138	45	23276	7.4963	0.0292587	0.668718	1.53374	0.0444444	AKAP6//PPP2CA
GO:0016573	histone acetylation	Biological process	2	139	45	23276	7.44237	0.0296499	0.668718	1.52798	0.0444444	YEATS2//SMAD4
GO:0035051	cardiocyte differentiation	Biological process	2	139	45	23276	7.44237	0.0296499	0.668718	1.52798	0.0444444	SMAD4//AKAP6
GO:0019219	regulation of nucleobase-containing compound metabolic process	Biological process	12	3487	45	23276	1.78002	0.0297748	0.668718	1.52615	0.266667	HIF1A//SMAD4//PPP2CA//YEATS2//SATB2//CDYL//CNOT6L//SETD2//TASP1//AKAP6//MLLT10//TDRD3
GO:0001838	embryonic epithelial tube formation	Biological process	2	140	45	23276	7.38921	0.0300432	0.668718	1.52225	0.0444444	SETD2//HIF1A
GO:0072175	epithelial tube formation	Biological process	2	140	45	23276	7.38921	0.0300432	0.668718	1.52225	0.0444444	SETD2//HIF1A
GO:0060562	epithelial tube morphogenesis	Biological process	3	351	45	23276	4.42089	0.0302673	0.668718	1.51903	0.0666667	SMAD4//SETD2//HIF1A
GO:0044257	cellular protein catabolic process	Biological process	4	614	45	23276	3.36967	0.0304566	0.668718	1.51632	0.0888889	HUWE1//IDE//USP12//UBE2G2
GO:0002070	epithelial cell maturation	Biological process	1	16	45	23276	32.3278	0.0304983	0.668718	1.51572	0.0222222	HIF1A
GO:0006089	lactate metabolic process	Biological process	1	16	45	23276	32.3278	0.0304983	0.668718	1.51572	0.0222222	HIF1A
GO:0060390	regulation of SMAD protein import into nucleus	Biological process	1	16	45	23276	32.3278	0.0304983	0.668718	1.51572	0.0222222	SMAD4
GO:0061462	protein localization to lysosome	Biological process	1	16	45	23276	32.3278	0.0304983	0.668718	1.51572	0.0222222	LAMP2
GO:1901020	negative regulation of calcium ion transmembrane transporter activity	Biological process	1	16	45	23276	32.3278	0.0304983	0.668718	1.51572	0.0222222	PPP2CA
GO:0010605	negative regulation of macromolecule metabolic process	Biological process	9	2312	45	23276	2.01349	0.0306695	0.668718	1.51329	0.2	HIF1A//SMAD4//PPP2CA//YEATS2//SATB2//CNOT6L//IDE//CDYL//UBE2G2
GO:0046887	positive regulation of hormone secretion	Biological process	2	142	45	23276	7.28513	0.0308361	0.668718	1.51094	0.0444444	SMAD4//HIF1A
GO:0051291	protein heterooligomerization	Biological process	2	143	45	23276	7.23419	0.0312356	0.668718	1.50535	0.0444444	PPP2CA//IDE
GO:0007568	aging	Biological process	2	144	45	23276	7.18395	0.0316372	0.668718	1.4998	0.0444444	MORC3//IDE
GO:0018393	internal peptidyl-lysine acetylation	Biological process	2	144	45	23276	7.18395	0.0316372	0.668718	1.4998	0.0444444	YEATS2//SMAD4
GO:0035303	regulation of dephosphorylation	Biological process	2	144	45	23276	7.18395	0.0316372	0.668718	1.4998	0.0444444	AKAP6//PPP2CA
GO:0055082	cellular chemical homeostasis	Biological process	4	624	45	23276	3.31567	0.0320486	0.668718	1.49419	0.0888889	HIF1A//SMAD4//AKAP6//PPP2CA
GO:0002076	osteoblast development	Biological process	1	17	45	23276	30.4261	0.032374	0.668718	1.4898	0.0222222	SATB2
GO:0030502	negative regulation of bone mineralization	Biological process	1	17	45	23276	30.4261	0.032374	0.668718	1.4898	0.0222222	HIF1A
GO:0032274	gonadotropin secretion	Biological process	1	17	45	23276	30.4261	0.032374	0.668718	1.4898	0.0222222	SMAD4
GO:0032352	positive regulation of hormone metabolic process	Biological process	1	17	45	23276	30.4261	0.032374	0.668718	1.4898	0.0222222	HIF1A
GO:0045722	positive regulation of gluconeogenesis	Biological process	1	17	45	23276	30.4261	0.032374	0.668718	1.4898	0.0222222	HIF1A
GO:0050779	RNA destabilization	Biological process	1	17	45	23276	30.4261	0.032374	0.668718	1.4898	0.0222222	CNOT6L
GO:0051532	regulation of NFAT protein import into nucleus	Biological process	1	17	45	23276	30.4261	0.032374	0.668718	1.4898	0.0222222	AKAP6
GO:0051797	regulation of hair follicle development	Biological process	1	17	45	23276	30.4261	0.032374	0.668718	1.4898	0.0222222	SMAD4
GO:0070243	regulation of thymocyte apoptotic process	Biological process	1	17	45	23276	30.4261	0.032374	0.668718	1.4898	0.0222222	HIF1A
GO:0072520	seminiferous tubule development	Biological process	1	17	45	23276	30.4261	0.032374	0.668718	1.4898	0.0222222	SMAD4
GO:1902259	regulation of delayed rectifier potassium channel activity	Biological process	1	17	45	23276	30.4261	0.032374	0.668718	1.4898	0.0222222	AKAP6
GO:2000136	regulation of cell proliferation involved in heart morphogenesis	Biological process	1	17	45	23276	30.4261	0.032374	0.668718	1.4898	0.0222222	SMAD4
GO:0009749	response to glucose	Biological process	2	146	45	23276	7.08554	0.0324466	0.668718	1.48883	0.0444444	HIF1A//PPP2CA
GO:0097659	nucleic acid-templated transcription	Biological process	11	3124	45	23276	1.82128	0.0325848	0.668718	1.48698	0.244444	HIF1A//SMAD4//PPP2CA//YEATS2//SATB2//CDYL//CNOT6L//SETD2//TASP1//MLLT10//TDRD3
GO:0035295	tube development	Biological process	4	630	45	23276	3.28409	0.0330271	0.668718	1.48113	0.0888889	SMAD4//SETD2//HIF1A//MAN2A1
GO:0060255	regulation of macromolecule metabolic process	Biological process	16	5262	45	23276	1.57277	0.0332263	0.668718	1.47852	0.355556	HIF1A//SMAD4//PPP2CA//YEATS2//SATB2//AKAP6//CDYL//CNOT6L//SETD2//RHBDD1//TASP1//IDE//MLLT10//GAREM//TDRD3//UBE2G2
GO:0060041	retina development in camera-type eye	Biological process	2	148	45	23276	6.98979	0.0332642	0.668718	1.47802	0.0444444	MAN2A1//HIF1A
GO:0006139	nucleobase-containing compound metabolic process	Biological process	15	4823	45	23276	1.60868	0.0333493	0.668718	1.47691	0.333333	REV3L//ORC4//HIF1A//SMAD4//PPP2CA//YEATS2//SATB2//CNOT6L//HUWE1//SETD2//CDYL//TDRD3//TASP1//AKAP6//MLLT10
GO:0032774	RNA biosynthetic process	Biological process	11	3138	45	23276	1.81316	0.0335414	0.668718	1.47442	0.244444	HIF1A//SMAD4//PPP2CA//YEATS2//SATB2//CDYL//CNOT6L//SETD2//TASP1//MLLT10//TDRD3
GO:0009746	response to hexose	Biological process	2	149	45	23276	6.94288	0.033676	0.668718	1.47268	0.0444444	HIF1A//PPP2CA
GO:0006475	internal protein amino acid acetylation	Biological process	2	150	45	23276	6.89659	0.0340898	0.668718	1.46738	0.0444444	YEATS2//SMAD4
GO:0034284	response to monosaccharide	Biological process	2	150	45	23276	6.89659	0.0340898	0.668718	1.46738	0.0444444	HIF1A//PPP2CA
GO:0003181	atrioventricular valve morphogenesis	Biological process	1	18	45	23276	28.7358	0.0342461	0.668718	1.46539	0.0222222	SMAD4
GO:0006907	pinocytosis	Biological process	1	18	45	23276	28.7358	0.0342461	0.668718	1.46539	0.0222222	SNX5
GO:0008340	determination of adult lifespan	Biological process	1	18	45	23276	28.7358	0.0342461	0.668718	1.46539	0.0222222	IDE
GO:0051531	NFAT protein import into nucleus	Biological process	1	18	45	23276	28.7358	0.0342461	0.668718	1.46539	0.0222222	AKAP6
GO:0061323	cell proliferation involved in heart morphogenesis	Biological process	1	18	45	23276	28.7358	0.0342461	0.668718	1.46539	0.0222222	SMAD4
GO:0071870	cellular response to catecholamine stimulus	Biological process	1	18	45	23276	28.7358	0.0342461	0.668718	1.46539	0.0222222	AKAP6
GO:1902176	negative regulation of oxidative stress-induced intrinsic apoptotic signaling pathway	Biological process	1	18	45	23276	28.7358	0.0342461	0.668718	1.46539	0.0222222	HIF1A
GO:0018394	peptidyl-lysine acetylation	Biological process	2	151	45	23276	6.85092	0.0345056	0.668718	1.46211	0.0444444	YEATS2//SMAD4
GO:0051252	regulation of RNA metabolic process	Biological process	11	3160	45	23276	1.80053	0.0350858	0.668718	1.45487	0.244444	HIF1A//SMAD4//PPP2CA//YEATS2//SATB2//CDYL//CNOT6L//SETD2//TASP1//MLLT10//TDRD3
GO:0051050	positive regulation of transport	Biological process	5	952	45	23276	2.71662	0.0358537	0.668718	1.44547	0.111111	SMAD4//HIF1A//RHBDD1//AKAP6//HUWE1
GO:0010869	regulation of receptor biosynthetic process	Biological process	1	19	45	23276	27.2234	0.0361146	0.668718	1.44232	0.0222222	HIF1A
GO:0010954	positive regulation of protein processing	Biological process	1	19	45	23276	27.2234	0.0361146	0.668718	1.44232	0.0222222	RHBDD1
GO:0020027	hemoglobin metabolic process	Biological process	1	19	45	23276	27.2234	0.0361146	0.668718	1.44232	0.0222222	HIF1A
GO:0032461	positive regulation of protein oligomerization	Biological process	1	19	45	23276	27.2234	0.0361146	0.668718	1.44232	0.0222222	IDE
GO:0033962	cytoplasmic mRNA processing body assembly	Biological process	1	19	45	23276	27.2234	0.0361146	0.668718	1.44232	0.0222222	CNOT6L
GO:0070168	negative regulation of biomineral tissue development	Biological process	1	19	45	23276	27.2234	0.0361146	0.668718	1.44232	0.0222222	HIF1A
GO:0070208	protein heterotrimerization	Biological process	1	19	45	23276	27.2234	0.0361146	0.668718	1.44232	0.0222222	PPP2CA
GO:0070861	regulation of protein exit from endoplasmic reticulum	Biological process	1	19	45	23276	27.2234	0.0361146	0.668718	1.44232	0.0222222	UBE2G2
GO:0071364	cellular response to epidermal growth factor stimulus	Biological process	1	19	45	23276	27.2234	0.0361146	0.668718	1.44232	0.0222222	GAREM
GO:0071868	cellular response to monoamine stimulus	Biological process	1	19	45	23276	27.2234	0.0361146	0.668718	1.44232	0.0222222	AKAP6
GO:0071869	response to catecholamine	Biological process	1	19	45	23276	27.2234	0.0361146	0.668718	1.44232	0.0222222	AKAP6
GO:2000727	positive regulation of cardiac muscle cell differentiation	Biological process	1	19	45	23276	27.2234	0.0361146	0.668718	1.44232	0.0222222	AKAP6
GO:0001890	placenta development	Biological process	2	155	45	23276	6.67412	0.0361888	0.668718	1.44143	0.0444444	HIF1A//SETD2
GO:0006479	protein methylation	Biological process	2	155	45	23276	6.67412	0.0361888	0.668718	1.44143	0.0444444	SETD2//SMAD4
GO:0008213	protein alkylation	Biological process	2	155	45	23276	6.67412	0.0361888	0.668718	1.44143	0.0444444	SETD2//SMAD4
GO:0035148	tube formation	Biological process	2	155	45	23276	6.67412	0.0361888	0.668718	1.44143	0.0444444	SETD2//HIF1A
GO:0042445	hormone metabolic process	Biological process	2	155	45	23276	6.67412	0.0361888	0.668718	1.44143	0.0444444	HIF1A//IDE
GO:0060284	regulation of cell development	Biological process	5	955	45	23276	2.70809	0.0362691	0.668718	1.44046	0.111111	HIF1A//SMAD4//PPP2CA//MAN2A1//AKAP6
GO:1901135	carbohydrate derivative metabolic process	Biological process	5	955	45	23276	2.70809	0.0362691	0.668718	1.44046	0.111111	HIF1A//RPN1//MAN2A1//UBE2G2//AKAP6
GO:1902589	single-organism organelle organization	Biological process	9	2387	45	23276	1.95023	0.0366683	0.67403	1.43571	0.2	ARHGAP26//STX8//STAG1//SETD2//HUWE1//MKLN1//YEATS2//SMAD4//HIF1A
GO:0009887	organ morphogenesis	Biological process	5	964	45	23276	2.6828	0.0375333	0.675615	1.42558	0.111111	SMAD4//HIF1A//SETD2//SATB2//MAN2A1
GO:0050794	regulation of cellular process	Biological process	26	10125	45	23276	1.32823	0.0378298	0.675615	1.42217	0.577778	HIF1A//SMAD4//PPP2CA//YEATS2//SATB2//AKAP6//ADGRE1//ARHGAP26//SNRK//CDYL//CNOT6L//SETD2//GAREM//RHBDD1//TPD52//MKLN1//TASP1//IDE//RALGAPA2//MLLT10//MORC3//MAN2A1//STX8//TDRD3//HUWE1//UBE2G2
GO:0009743	response to carbohydrate	Biological process	2	159	45	23276	6.50622	0.0379033	0.675615	1.42132	0.0444444	HIF1A//PPP2CA
GO:0006298	mismatch repair	Biological process	1	20	45	23276	25.8622	0.0379797	0.675615	1.42045	0.0222222	SETD2
GO:0010719	negative regulation of epithelial to mesenchymal transition	Biological process	1	20	45	23276	25.8622	0.0379797	0.675615	1.42045	0.0222222	PPP2CA
GO:0010738	regulation of protein kinase A signaling	Biological process	1	20	45	23276	25.8622	0.0379797	0.675615	1.42045	0.0222222	AKAP6
GO:0036003	positive regulation of transcription from RNA polymerase II promoter in response to stress	Biological process	1	20	45	23276	25.8622	0.0379797	0.675615	1.42045	0.0222222	HIF1A
GO:0045648	positive regulation of erythrocyte differentiation	Biological process	1	20	45	23276	25.8622	0.0379797	0.675615	1.42045	0.0222222	HIF1A
GO:0060575	intestinal epithelial cell differentiation	Biological process	1	20	45	23276	25.8622	0.0379797	0.675615	1.42045	0.0222222	HIF1A
GO:0071867	response to monoamine	Biological process	1	20	45	23276	25.8622	0.0379797	0.675615	1.42045	0.0222222	AKAP6
GO:1903319	positive regulation of protein maturation	Biological process	1	20	45	23276	25.8622	0.0379797	0.675615	1.42045	0.0222222	RHBDD1
GO:0048729	tissue morphogenesis	Biological process	4	660	45	23276	3.13481	0.0381833	0.677251	1.41813	0.0888889	SMAD4//SETD2//HIF1A//MAN2A1
GO:0005975	carbohydrate metabolic process	Biological process	4	662	45	23276	3.12534	0.0385427	0.681633	1.41406	0.0888889	MAN2A1//HIF1A//RPN1//UBE2G2
GO:0003171	atrioventricular valve development	Biological process	1	21	45	23276	24.6307	0.0398412	0.693428	1.39967	0.0222222	SMAD4
GO:0014850	response to muscle activity	Biological process	1	21	45	23276	24.6307	0.0398412	0.693428	1.39967	0.0222222	HIF1A
GO:0034067	protein localization to Golgi apparatus	Biological process	1	21	45	23276	24.6307	0.0398412	0.693428	1.39967	0.0222222	ATP9B
GO:0070884	regulation of calcineurin-NFAT signaling cascade	Biological process	1	21	45	23276	24.6307	0.0398412	0.693428	1.39967	0.0222222	AKAP6
GO:0071354	cellular response to interleukin-6	Biological process	1	21	45	23276	24.6307	0.0398412	0.693428	1.39967	0.0222222	SMAD4
GO:0006281	DNA repair	Biological process	3	392	45	23276	3.9585	0.0399713	0.693428	1.39825	0.0666667	HUWE1//SETD2//REV3L
GO:0035239	tube morphogenesis	Biological process	3	393	45	23276	3.94843	0.0402256	0.693428	1.3955	0.0666667	SMAD4//SETD2//HIF1A
GO:0000209	protein polyubiquitination	Biological process	2	165	45	23276	6.26963	0.0405325	0.693428	1.3922	0.0444444	UBE2G2//HUWE1
GO:0048592	eye morphogenesis	Biological process	2	165	45	23276	6.26963	0.0405325	0.693428	1.3922	0.0444444	HIF1A//MAN2A1
GO:0010033	response to organic substance	Biological process	9	2441	45	23276	1.90709	0.0414686	0.693428	1.38228	0.2	SMAD4//UBE2G2//HIF1A//RHBDD1//PAPPA//SATB2//AKAP6//PPP2CA//GAREM
GO:0006468	protein phosphorylation	Biological process	7	1686	45	23276	2.14752	0.0416664	0.693428	1.38021	0.155556	PPP2CA//AKAP6//SMAD4//MORC3//GAREM//SNRK//STK35
GO:0003203	endocardial cushion morphogenesis	Biological process	1	22	45	23276	23.5111	0.0416991	0.693428	1.37987	0.0222222	SMAD4
GO:0006623	protein targeting to vacuole	Biological process	1	22	45	23276	23.5111	0.0416991	0.693428	1.37987	0.0222222	LAMP2
GO:0043687	post-translational protein modification	Biological process	1	22	45	23276	23.5111	0.0416991	0.693428	1.37987	0.0222222	RHBDD1
GO:0060065	uterus development	Biological process	1	22	45	23276	23.5111	0.0416991	0.693428	1.37987	0.0222222	SMAD4
GO:0060749	mammary gland alveolus development	Biological process	1	22	45	23276	23.5111	0.0416991	0.693428	1.37987	0.0222222	HIF1A
GO:0061377	mammary gland lobule development	Biological process	1	22	45	23276	23.5111	0.0416991	0.693428	1.37987	0.0222222	HIF1A
GO:0070242	thymocyte apoptotic process	Biological process	1	22	45	23276	23.5111	0.0416991	0.693428	1.37987	0.0222222	HIF1A
GO:0070849	response to epidermal growth factor	Biological process	1	22	45	23276	23.5111	0.0416991	0.693428	1.37987	0.0222222	GAREM
GO:0046483	heterocycle metabolic process	Biological process	15	4961	45	23276	1.56393	0.0418253	0.693428	1.37856	0.333333	REV3L//ORC4//HIF1A//SMAD4//PPP2CA//YEATS2//SATB2//CNOT6L//HUWE1//SETD2//CDYL//TDRD3//TASP1//AKAP6//MLLT10
GO:0003205	cardiac chamber development	Biological process	2	169	45	23276	6.12124	0.0423229	0.693428	1.37342	0.0444444	HIF1A//SMAD4
GO:0016331	morphogenesis of embryonic epithelium	Biological process	2	169	45	23276	6.12124	0.0423229	0.693428	1.37342	0.0444444	SETD2//HIF1A
GO:0031326	regulation of cellular biosynthetic process	Biological process	12	3679	45	23276	1.68713	0.0429332	0.693428	1.36721	0.266667	HIF1A//SMAD4//PPP2CA//YEATS2//SATB2//CDYL//CNOT6L//SETD2//TASP1//AKAP6//MLLT10//TDRD3
GO:0019222	regulation of metabolic process	Biological process	17	5882	45	23276	1.49493	0.0431855	0.693428	1.36466	0.377778	HIF1A//SMAD4//PPP2CA//YEATS2//SATB2//AKAP6//CDYL//CNOT6L//SETD2//RHBDD1//TASP1//IDE//MLLT10//GAREM//RALGAPA2//TDRD3//UBE2G2
GO:0048522	positive regulation of cellular process	Biological process	14	4541	45	23276	1.59468	0.0432005	0.693428	1.36451	0.311111	AKAP6//HIF1A//SMAD4//TPD52//CNOT6L//GAREM//RHBDD1//TASP1//IDE//PPP2CA//MLLT10//SATB2//MAN2A1//HUWE1
GO:0032412	regulation of ion transmembrane transporter activity	Biological process	2	171	45	23276	6.04964	0.0432292	0.693428	1.36422	0.0444444	AKAP6//PPP2CA
GO:0006301	postreplication repair	Biological process	1	23	45	23276	22.4889	0.0435536	0.693428	1.36098	0.0222222	REV3L
GO:0007184	SMAD protein import into nucleus	Biological process	1	23	45	23276	22.4889	0.0435536	0.693428	1.36098	0.0222222	SMAD4
GO:0010575	positive regulation of vascular endothelial growth factor production	Biological process	1	23	45	23276	22.4889	0.0435536	0.693428	1.36098	0.0222222	HIF1A
GO:0030511	positive regulation of transforming growth factor beta receptor signaling pathway	Biological process	1	23	45	23276	22.4889	0.0435536	0.693428	1.36098	0.0222222	SMAD4
GO:0043171	peptide catabolic process	Biological process	1	23	45	23276	22.4889	0.0435536	0.693428	1.36098	0.0222222	IDE
GO:0043457	regulation of cellular respiration	Biological process	1	23	45	23276	22.4889	0.0435536	0.693428	1.36098	0.0222222	HIF1A
GO:0060317	cardiac epithelial to mesenchymal transition	Biological process	1	23	45	23276	22.4889	0.0435536	0.693428	1.36098	0.0222222	SMAD4
GO:0070741	response to interleukin-6	Biological process	1	23	45	23276	22.4889	0.0435536	0.693428	1.36098	0.0222222	SMAD4
GO:0072666	establishment of protein localization to vacuole	Biological process	1	23	45	23276	22.4889	0.0435536	0.693428	1.36098	0.0222222	LAMP2
GO:1901522	positive regulation of transcription from RNA polymerase II promoter involved in cellular response to chemical stimulus	Biological process	1	23	45	23276	22.4889	0.0435536	0.693428	1.36098	0.0222222	HIF1A
GO:1903170	negative regulation of calcium ion transmembrane transport	Biological process	1	23	45	23276	22.4889	0.0435536	0.693428	1.36098	0.0222222	PPP2CA
GO:1903846	positive regulation of cellular response to transforming growth factor beta stimulus	Biological process	1	23	45	23276	22.4889	0.0435536	0.693428	1.36098	0.0222222	SMAD4
GO:0048608	reproductive structure development	Biological process	3	407	45	23276	3.81261	0.043873	0.695459	1.3578	0.0666667	SMAD4//HIF1A//SETD2
GO:0003006	developmental process involved in reproduction	Biological process	4	691	45	23276	2.99418	0.0439758	0.695459	1.35679	0.0888889	SMAD4//HIF1A//RHBDD1//SETD2
GO:2000113	negative regulation of cellular macromolecule biosynthetic process	Biological process	6	1348	45	23276	2.30227	0.0440769	0.695459	1.35579	0.133333	HIF1A//SMAD4//PPP2CA//YEATS2//SATB2//CNOT6L
GO:0048732	gland development	Biological process	3	408	45	23276	3.80327	0.0441398	0.695459	1.35517	0.0666667	MAN2A1//HIF1A//SMAD4
GO:0006725	cellular aromatic compound metabolic process	Biological process	15	4999	45	23276	1.55204	0.0444183	0.695515	1.35244	0.333333	REV3L//ORC4//HIF1A//SMAD4//PPP2CA//YEATS2//SATB2//CNOT6L//HUWE1//SETD2//CDYL//TDRD3//TASP1//AKAP6//MLLT10
GO:0006473	protein acetylation	Biological process	2	174	45	23276	5.94534	0.0446022	0.695515	1.35064	0.0444444	YEATS2//SMAD4
GO:0051216	cartilage development	Biological process	2	175	45	23276	5.91137	0.0450635	0.695515	1.34618	0.0444444	HIF1A//SATB2
GO:0061458	reproductive system development	Biological process	3	412	45	23276	3.76634	0.0452148	0.695515	1.34472	0.0666667	SMAD4//HIF1A//SETD2
GO:0003298	physiological muscle hypertrophy	Biological process	1	24	45	23276	21.5519	0.0454045	0.695515	1.3429	0.0222222	AKAP6
GO:0003301	physiological cardiac muscle hypertrophy	Biological process	1	24	45	23276	21.5519	0.0454045	0.695515	1.3429	0.0222222	AKAP6
GO:0006491	N-glycan processing	Biological process	1	24	45	23276	21.5519	0.0454045	0.695515	1.3429	0.0222222	MAN2A1
GO:0032800	receptor biosynthetic process	Biological process	1	24	45	23276	21.5519	0.0454045	0.695515	1.3429	0.0222222	HIF1A
GO:0061049	cell growth involved in cardiac muscle cell development	Biological process	1	24	45	23276	21.5519	0.0454045	0.695515	1.3429	0.0222222	AKAP6
GO:0070233	negative regulation of T cell apoptotic process	Biological process	1	24	45	23276	21.5519	0.0454045	0.695515	1.3429	0.0222222	HIF1A
GO:1904292	regulation of ERAD pathway	Biological process	1	24	45	23276	21.5519	0.0454045	0.695515	1.3429	0.0222222	UBE2G2
GO:0022898	regulation of transmembrane transporter activity	Biological process	2	176	45	23276	5.87778	0.0455265	0.695627	1.34174	0.0444444	AKAP6//PPP2CA
GO:0051047	positive regulation of secretion	Biological process	3	416	45	23276	3.73013	0.046303	0.701347	1.33439	0.0666667	SMAD4//HIF1A//RHBDD1
GO:0021915	neural tube development	Biological process	2	178	45	23276	5.81174	0.046458	0.701347	1.33294	0.0444444	SETD2//HIF1A
GO:0001666	response to hypoxia	Biological process	2	179	45	23276	5.77927	0.0469263	0.701347	1.32858	0.0444444	HIF1A//SMAD4
GO:0002052	positive regulation of neuroblast proliferation	Biological process	1	25	45	23276	20.6898	0.047252	0.701347	1.32558	0.0222222	HIF1A
GO:0006270	DNA replication initiation	Biological process	1	25	45	23276	20.6898	0.047252	0.701347	1.32558	0.0222222	ORC4
GO:0010737	protein kinase A signaling	Biological process	1	25	45	23276	20.6898	0.047252	0.701347	1.32558	0.0222222	AKAP6
GO:0042634	regulation of hair cycle	Biological process	1	25	45	23276	20.6898	0.047252	0.701347	1.32558	0.0222222	SMAD4
GO:0050435	beta-amyloid metabolic process	Biological process	1	25	45	23276	20.6898	0.047252	0.701347	1.32558	0.0222222	IDE
GO:0060039	pericardium development	Biological process	1	25	45	23276	20.6898	0.047252	0.701347	1.32558	0.0222222	SETD2
GO:0060306	regulation of membrane repolarization	Biological process	1	25	45	23276	20.6898	0.047252	0.701347	1.32558	0.0222222	AKAP6
GO:1901021	positive regulation of calcium ion transmembrane transporter activity	Biological process	1	25	45	23276	20.6898	0.047252	0.701347	1.32558	0.0222222	AKAP6
GO:0044271	cellular nitrogen compound biosynthetic process	Biological process	13	4161	45	23276	1.616	0.0472883	0.701347	1.32525	0.288889	HIF1A//SMAD4//PPP2CA//YEATS2//SATB2//CDYL//CNOT6L//SETD2//TASP1//REV3L//AKAP6//MLLT10//TDRD3
GO:0009889	regulation of biosynthetic process	Biological process	12	3738	45	23276	1.6605	0.0477101	0.705876	1.32139	0.266667	HIF1A//SMAD4//PPP2CA//YEATS2//SATB2//CDYL//CNOT6L//SETD2//TASP1//AKAP6//MLLT10//TDRD3
GO:0010613	positive regulation of cardiac muscle hypertrophy	Biological process	1	26	45	23276	19.894	0.0490959	0.721104	1.30895	0.0222222	AKAP6
GO:0014742	positive regulation of muscle hypertrophy	Biological process	1	26	45	23276	19.894	0.0490959	0.721104	1.30895	0.0222222	AKAP6
GO:0072595	maintenance of protein localization in organelle	Biological process	1	26	45	23276	19.894	0.0490959	0.721104	1.30895	0.0222222	MORC3
GO:0036293	response to decreased oxygen levels	Biological process	2	184	45	23276	5.62222	0.0492944	0.722251	1.3072	0.0444444	HIF1A//SMAD4
GO:0051171	regulation of nitrogen compound metabolic process	Biological process	12	3758	45	23276	1.65166	0.0494121	0.722251	1.30617	0.266667	HIF1A//SMAD4//PPP2CA//YEATS2//SATB2//CDYL//CNOT6L//SETD2//TASP1//AKAP6//MLLT10//TDRD3
GO:0010821	regulation of mitochondrion organization	Biological process	2	185	45	23276	5.59183	0.0497732	0.725779	1.303	0.0444444	HIF1A//HUWE1
GO:0044446	intracellular organelle part	Cellular component	24	5958	43	23196	2.17298	2.5479e-05	0.0170543	4.59382	0.55814	REV3L//SNX5//AKAP6//STAG1//ORC4//CDYL//IDE//MLLT10//SATB2//MORC3//HUWE1//ETNK1//TDRD3//MAN2A1//RPN1//RHBDD1//LAMP2//SMAD4//STX8//YEATS2//ATP9A//ATP9B//PPP2CA//HIF1A
GO:0044422	organelle part	Cellular component	24	6159	43	23196	2.10206	4.59684e-05	0.0170543	4.33754	0.55814	AKAP6//REV3L//MAN2A1//RPN1//RHBDD1//SNX5//ATP9A//ATP9B//STX8//PPP2CA//ORC4//STAG1//SMAD4//SATB2//CDYL//IDE//MLLT10//MORC3//HUWE1//ETNK1//TDRD3//HIF1A//YEATS2//LAMP2
GO:0043231	intracellular membrane-bounded organelle	Cellular component	31	9959	43	23196	1.67915	0.000102491	0.0253495	3.98931	0.72093	IDE//DCAF5//RHBDD1//RPN1//TPD52//UBE2G2//CDYL//HIF1A//SMAD4//MLLT10//PPP2CA//REV3L//SNRK//YEATS2//STAG1//SATB2//TDRD3//CNOT6L//SETD2//AKAP6//ORC4//MORC3//HUWE1//STK35//ATP9A//LAMP2//ATP9B//STX8//SNX5//MAN2A1//ETNK1
GO:0043229	intracellular organelle	Cellular component	32	10996	43	23196	1.56986	0.000287454	0.0415058	3.54143	0.744186	SNX5//IDE//DCAF5//RHBDD1//RPN1//TPD52//UBE2G2//CDYL//HIF1A//SMAD4//MLLT10//PPP2CA//REV3L//SNRK//YEATS2//STAG1//SATB2//TDRD3//CNOT6L//SETD2//AKAP6//ORC4//MORC3//HUWE1//STK35//ATP9A//LAMP2//ATP9B//STX8//MAN2A1//ARHGAP26//ETNK1
GO:0005622	intracellular	Cellular component	35	12802	43	23196	1.47481	0.000290984	0.0415058	3.53613	0.813953	SATB2//MAN2A1//PPP2CA//ORC4//STAG1//SMAD4//LAMP2//IDE//DCAF5//RHBDD1//HIF1A//UBE2G2//MKLN1//RPN1//TPD52//CDYL//MLLT10//REV3L//SNRK//YEATS2//TDRD3//CNOT6L//SETD2//AKAP6//MORC3//HUWE1//STK35//RALGAPA2//SNX5//ARHGAP26//ETNK1//STX8//ATP9A//ATP9B//ANO10
GO:0043227	membrane-bounded organelle	Cellular component	32	11071	43	23196	1.55922	0.000335626	0.0415058	3.47414	0.744186	IDE//DCAF5//RHBDD1//RPN1//TPD52//UBE2G2//CDYL//HIF1A//SMAD4//MLLT10//PPP2CA//REV3L//SNRK//YEATS2//STAG1//SATB2//TDRD3//CNOT6L//SETD2//AKAP6//ORC4//MORC3//HUWE1//STK35//ATP9A//LAMP2//ATP9B//STX8//SNX5//MAN2A1//CDHR5//ETNK1
GO:0044428	nuclear part	Cellular component	15	3224	43	23196	2.50981	0.000434669	0.0460749	3.36184	0.348837	AKAP6//CDYL//IDE//MLLT10//STAG1//SATB2//ORC4//MORC3//HUWE1//ETNK1//REV3L//TDRD3//SMAD4//HIF1A//YEATS2
GO:0043226	organelle	Cellular component	33	12018	43	23196	1.48124	0.000690205	0.0495363	3.16102	0.767442	STX8//HIF1A//SNX5//IDE//DCAF5//RHBDD1//RPN1//TPD52//UBE2G2//CDYL//SMAD4//MLLT10//PPP2CA//REV3L//SNRK//YEATS2//STAG1//SATB2//TDRD3//CNOT6L//SETD2//AKAP6//ORC4//MORC3//HUWE1//STK35//ATP9A//LAMP2//ATP9B//MAN2A1//CDHR5//ARHGAP26//ETNK1
GO:0044424	intracellular part	Cellular component	34	12670	43	23196	1.44759	0.000758497	0.0495363	3.12005	0.790698	PPP2CA//HIF1A//IDE//SMAD4//MLLT10//SNRK//SATB2//TDRD3//TPD52//CNOT6L//AKAP6//RALGAPA2//ORC4//MKLN1//HUWE1//STK35//SNX5//ARHGAP26//ETNK1//REV3L//DCAF5//RHBDD1//UBE2G2//RPN1//ATP9A//LAMP2//ATP9B//STX8//MAN2A1//YEATS2//CDYL//STAG1//SETD2//MORC3
GO:0005654	nucleoplasm	Cellular component	11	1989	43	23196	2.98334	0.000783458	0.0495363	3.10598	0.255814	SATB2//YEATS2//MORC3//HIF1A//CDYL//IDE//MLLT10//STAG1//ORC4//HUWE1//ETNK1
GO:0070013	intracellular organelle lumen	Cellular component	14	3046	43	23196	2.47938	0.000824628	0.0495363	3.08374	0.325581	IDE//CDYL//MLLT10//STAG1//SATB2//ORC4//MORC3//HUWE1//ETNK1//REV3L//LAMP2//SMAD4//YEATS2//HIF1A
GO:0043233	organelle lumen	Cellular component	14	3052	43	23196	2.4745	0.000841135	0.0495363	3.07513	0.325581	IDE//CDYL//MLLT10//STAG1//SATB2//ORC4//MORC3//HUWE1//ETNK1//REV3L//LAMP2//SMAD4//YEATS2//HIF1A
GO:0043234	protein complex	Cellular component	16	3826	43	23196	2.2559	0.000867887	0.0495363	3.06154	0.372093	ORC4//HIF1A//SMAD4//SATB2//CNOT6L//TDRD3//IDE//RPN1//SNX5//STX8//LAMP2//PPP2CA//DCAF5//YEATS2//AKAP6//REV3L
GO:0031974	membrane-enclosed lumen	Cellular component	14	3110	43	23196	2.42836	0.00101586	0.0498579	2.99317	0.325581	IDE//CDYL//MLLT10//STAG1//SATB2//ORC4//MORC3//HUWE1//ETNK1//REV3L//LAMP2//SMAD4//YEATS2//HIF1A
GO:0044464	cell part	Cellular component	37	14770	43	23196	1.35134	0.00104754	0.0498579	2.97983	0.860465	ANO10//ATP9A//ADGRE1//IDE//LAMP2//PPP2CA//RALGAPA2//ATP9B//SNX5//CDHR5//ETNK1//SMAD4//STX8//MKLN1//AKAP6//HIF1A//MLLT10//SNRK//SATB2//TDRD3//TPD52//CNOT6L//ORC4//HUWE1//STK35//ARHGAP26//DCAF5//YEATS2//REV3L//RHBDD1//RPN1//UBE2G2//CDYL//STAG1//SETD2//MORC3//MAN2A1
GO:0005623	cell	Cellular component	37	14784	43	23196	1.35006	0.0010751	0.0498579	2.96855	0.860465	ANO10//ATP9A//ADGRE1//IDE//LAMP2//PPP2CA//RALGAPA2//ATP9B//SNX5//CDHR5//ETNK1//SATB2//MAN2A1//SMAD4//ORC4//STAG1//MKLN1//DCAF5//RHBDD1//HIF1A//UBE2G2//RPN1//TPD52//CDYL//MLLT10//REV3L//SNRK//YEATS2//TDRD3//CNOT6L//SETD2//AKAP6//MORC3//HUWE1//STK35//ARHGAP26//STX8
GO:0031981	nuclear lumen	Cellular component	13	2790	43	23196	2.51353	0.00118911	0.0519013	2.92478	0.302326	CDYL//IDE//MLLT10//STAG1//SATB2//ORC4//MORC3//HUWE1//ETNK1//REV3L//SMAD4//YEATS2//HIF1A
GO:0031902	late endosome membrane	Cellular component	2	32	43	23196	33.7151	0.00160714	0.06625	2.79395	0.0465116	LAMP2//STX8
GO:0032991	macromolecular complex	Cellular component	17	4571	43	23196	2.00624	0.00214072	0.0836009	2.66944	0.395349	STAG1//SMAD4//AKAP6//SATB2//ORC4//HIF1A//CNOT6L//TDRD3//IDE//RPN1//SNX5//STX8//LAMP2//DCAF5//PPP2CA//REV3L//YEATS2
GO:0005737	cytoplasm	Cellular component	28	9903	43	23196	1.52523	0.00249874	0.0927031	2.60228	0.651163	SNX5//MKLN1//AKAP6//MAN2A1//LAMP2//IDE//DCAF5//RHBDD1//HIF1A//PPP2CA//UBE2G2//RPN1//TPD52//STX8//ATP9A//ATP9B//SMAD4//MLLT10//SNRK//SATB2//TDRD3//CNOT6L//RALGAPA2//ORC4//HUWE1//STK35//ARHGAP26//ETNK1
GO:0010008	endosome membrane	Cellular component	3	152	43	23196	10.6469	0.00280968	0.0992752	2.55134	0.0697674	SNX5//LAMP2//STX8
GO:0048471	perinuclear region of cytoplasm	Cellular component	5	556	43	23196	4.8511	0.00352854	0.115121	2.45241	0.116279	ATP9A//TPD52//AKAP6//ATP9B//STX8
GO:0044440	endosomal part	Cellular component	3	166	43	23196	9.74895	0.00360062	0.115121	2.44362	0.0697674	SNX5//LAMP2//STX8
GO:0005802	trans-Golgi network	Cellular component	3	168	43	23196	9.63289	0.00372359	0.115121	2.42904	0.0697674	ATP9A//ATP9B//STX8
GO:0005634	nucleus	Cellular component	20	6261	43	23196	1.72318	0.0047064	0.138327	2.32731	0.465116	ORC4//SMAD4//SATB2//AKAP6//CDYL//IDE//MLLT10//STAG1//MORC3//HUWE1//ETNK1//YEATS2//REV3L//HIF1A//TDRD3//PPP2CA//SNRK//CNOT6L//SETD2//STK35
GO:0098588	bounding membrane of organelle	Cellular component	7	1149	43	23196	3.28642	0.00484705	0.138327	2.31452	0.162791	MAN2A1//RPN1//RHBDD1//LAMP2//SNX5//STX8//AKAP6
GO:0005694	chromosome	Cellular component	6	895	43	23196	3.61637	0.00584497	0.160628	2.23322	0.139535	PPP2CA//ORC4//STAG1//SMAD4//SATB2//SETD2
GO:0005769	early endosome	Cellular component	3	205	43	23196	7.89427	0.00647321	0.17154	2.18888	0.0697674	SNX5//ATP9A//STX8
GO:0044431	Golgi apparatus part	Cellular component	4	414	43	23196	5.212	0.00712775	0.182372	2.14705	0.0930233	MAN2A1//ATP9A//ATP9B//STX8
GO:0098791	Golgi subcompartment	Cellular component	3	225	43	23196	7.19256	0.00835345	0.205464	2.07813	0.0697674	ATP9A//ATP9B//STX8
GO:0005768	endosome	Cellular component	5	688	43	23196	3.92036	0.00858408	0.205464	2.06631	0.116279	ATP9A//STX8//LAMP2//SNX5//ATP9B
GO:1902494	catalytic complex	Cellular component	6	979	43	23196	3.30608	0.00893452	0.207169	2.04893	0.139535	SATB2//RPN1//DCAF5//PPP2CA//REV3L//YEATS2
GO:0031984	organelle subcompartment	Cellular component	3	237	43	23196	6.82838	0.00962054	0.216316	2.0168	0.0697674	ATP9A//ATP9B//STX8
GO:0090575	RNA polymerase II transcription factor complex	Cellular component	2	95	43	23196	11.3567	0.0134389	0.293283	1.87164	0.0465116	SMAD4//HIF1A
GO:0012505	endomembrane system	Cellular component	12	3333	43	23196	1.94218	0.0155105	0.325742	1.80937	0.27907	RPN1//TPD52//UBE2G2//RHBDD1//AKAP6//ATP9A//LAMP2//ATP9B//STX8//SNX5//MAN2A1//CDHR5
GO:0044427	chromosomal part	Cellular component	5	803	43	23196	3.35892	0.0159377	0.325742	1.79758	0.116279	STAG1//ORC4//SMAD4//SATB2//PPP2CA
GO:0055037	recycling endosome	Cellular component	2	105	43	23196	10.2751	0.0162432	0.325742	1.78933	0.0465116	ATP9A//STX8
GO:0044798	nuclear transcription factor complex	Cellular component	2	122	43	23196	8.84331	0.0215279	0.408563	1.667	0.0465116	HIF1A//SMAD4
GO:0031597	cytosolic proteasome complex	Cellular component	1	12	43	23196	44.9535	0.022025	0.408563	1.65708	0.0232558	IDE
GO:0042575	DNA polymerase complex	Cellular component	1	12	43	23196	44.9535	0.022025	0.408563	1.65708	0.0232558	REV3L
GO:0044451	nucleoplasm part	Cellular component	4	592	43	23196	3.64488	0.0236295	0.427636	1.62655	0.0930233	SATB2//YEATS2//MORC3//HIF1A
GO:0005640	nuclear outer membrane	Cellular component	1	14	43	23196	38.5316	0.0256494	0.43437	1.59092	0.0232558	AKAP6
GO:0005671	Ada2/Gcn5/Ada3 transcription activator complex	Cellular component	1	14	43	23196	38.5316	0.0256494	0.43437	1.59092	0.0232558	YEATS2
GO:0005667	transcription factor complex	Cellular component	3	344	43	23196	4.70443	0.0257747	0.43437	1.58881	0.0697674	HIF1A//SMAD4//SATB2
GO:0005770	late endosome	Cellular component	2	136	43	23196	7.93297	0.0263432	0.43437	1.57933	0.0465116	LAMP2//STX8
GO:0030014	CCR4-NOT complex	Cellular component	1	15	43	23196	35.9628	0.0274568	0.440375	1.56135	0.0232558	CNOT6L
GO:0098796	membrane protein complex	Cellular component	5	929	43	23196	2.90335	0.0278944	0.440375	1.55448	0.116279	RPN1//SNX5//STX8//LAMP2//AKAP6
GO:0000159	protein phosphatase type 2A complex	Cellular component	1	16	43	23196	33.7151	0.0292608	0.452323	1.53371	0.0232558	PPP2CA
GO:0005789	endoplasmic reticulum membrane	Cellular component	3	367	43	23196	4.40961	0.0304154	0.460576	1.51691	0.0697674	RPN1//RHBDD1//AKAP6
GO:0030666	endocytic vesicle membrane	Cellular component	1	17	43	23196	31.7319	0.0310616	0.460953	1.50778	0.0232558	LAMP2
GO:1990234	transferase complex	Cellular component	4	665	43	23196	3.24476	0.034199	0.476162	1.46599	0.0930233	RPN1//DCAF5//YEATS2//REV3L
GO:0042175	nuclear outer membrane-endoplasmic reticulum membrane network	Cellular component	3	385	43	23196	4.20344	0.0343359	0.476162	1.46425	0.0697674	AKAP6//RPN1//RHBDD1
GO:0005782	peroxisomal matrix	Cellular component	1	19	43	23196	28.3917	0.0346533	0.476162	1.46026	0.0232558	IDE
GO:0031907	microbody lumen	Cellular component	1	19	43	23196	28.3917	0.0346533	0.476162	1.46026	0.0232558	IDE
GO:0031090	organelle membrane	Cellular component	7	1726	43	23196	2.18777	0.0379709	0.487841	1.42055	0.162791	AKAP6//MAN2A1//RPN1//RHBDD1//LAMP2//STX8//SNX5
GO:0033017	sarcoplasmic reticulum membrane	Cellular component	1	21	43	23196	25.6877	0.0382321	0.487841	1.41757	0.0232558	AKAP6
GO:0035145	exon-exon junction complex	Cellular component	1	21	43	23196	25.6877	0.0382321	0.487841	1.41757	0.0232558	TDRD3
GO:0005765	lysosomal membrane	Cellular component	2	168	43	23196	6.42193	0.0387906	0.487841	1.41127	0.0465116	LAMP2//STX8
GO:0098852	lytic vacuole membrane	Cellular component	2	168	43	23196	6.42193	0.0387906	0.487841	1.41127	0.0465116	LAMP2//STX8
GO:0030904	retromer complex	Cellular component	1	22	43	23196	24.5201	0.0400166	0.494871	1.39776	0.0232558	SNX5
GO:0080008	Cul4-RING E3 ubiquitin ligase complex	Cellular component	1	23	43	23196	23.454	0.0417978	0.508426	1.37885	0.0232558	DCAF5
GO:0005488	binding	Molecular function	37	12258	45	22849	1.53263	5.81758e-05	0.0751207	4.23526	0.822222	HIF1A//SMAD4//PPP2CA//SATB2//TPD52//UBE2G2//CNOT6L//AKAP6//MKLN1//ARHGAP26//RHBDD1//MAN2A1//SNX5//STX8//IDE//CDHR5//LAMP2//GAREM//ATP9A//REV3L//SNRK//ORC4//RBM33//ATP9B//STK35//ETNK1//STAG1//TDRD3//THAP4//YEATS2//RALGAPA2//HUWE1//MORC3//RPN1//MLLT10//PAPPA//ADGRE1
GO:0043167	ion binding	Molecular function	22	5178	45	22849	2.15732	0.000100429	0.0751207	3.99814	0.488889	ARHGAP26//ATP9A//IDE//SMAD4//MAN2A1//MLLT10//PAPPA//PPP2CA//REV3L//SNRK//CNOT6L//MORC3//ATP9B//THAP4//ADGRE1//TPD52//CDHR5//SNX5//UBE2G2//ORC4//STK35//ETNK1
GO:0046872	metal ion binding	Molecular function	16	3317	45	22849	2.44923	0.000364461	0.148268	3.43835	0.355556	ATP9A//SNRK//ATP9B//ADGRE1//TPD52//CDHR5//IDE//MAN2A1//MLLT10//MORC3//SMAD4//PAPPA//PPP2CA//REV3L//CNOT6L//THAP4
GO:0004012	phospholipid-translocating ATPase activity	Molecular function	2	16	45	22849	63.4694	0.000447202	0.148268	3.3495	0.0444444	ATP9A//ATP9B
GO:0043169	cation binding	Molecular function	16	3407	45	22849	2.38453	0.000495547	0.148268	3.30492	0.355556	ATP9A//IDE//SMAD4//MAN2A1//MLLT10//PAPPA//PPP2CA//REV3L//SNRK//CNOT6L//MORC3//ATP9B//THAP4//ADGRE1//TPD52//CDHR5
GO:0004175	endopeptidase activity	Molecular function	5	441	45	22849	5.75687	0.0016946	0.321694	2.77093	0.111111	USP12//RHBDD1//IDE//PAPPA//TASP1
GO:0016787	hydrolase activity	Molecular function	12	2390	45	22849	2.5494	0.00178185	0.321694	2.74913	0.266667	ABHD17B//IDE//PAPPA//USP12//TASP1//RHBDD1//MAN2A1//CNOT6L//REV3L//PPP2CA//ATP9A//ATP9B
GO:0051721	protein phosphatase 2A binding	Molecular function	2	33	45	22849	30.7731	0.00192625	0.321694	2.71529	0.0444444	PPP2CA//AKAP6
GO:0003824	catalytic activity	Molecular function	20	5456	45	22849	1.86127	0.00193532	0.321694	2.71325	0.444444	RPN1//CDYL//REV3L//SNRK//UBE2G2//SETD2//STK35//ETNK1//ATP9A//IDE//MAN2A1//PAPPA//PPP2CA//USP12//ABHD17B//CNOT6L//ATP9B//TASP1//RHBDD1//HUWE1
GO:0008408	3'-5' exonuclease activity	Molecular function	2	44	45	22849	23.0798	0.00340407	0.509249	2.468	0.0444444	CNOT6L//REV3L
GO:0005548	phospholipid transporter activity	Molecular function	2	47	45	22849	21.6066	0.00387531	0.527042	2.41169	0.0444444	ATP9A//ATP9B
GO:0005524	ATP binding	Molecular function	8	1355	45	22849	2.99782	0.00453046	0.550746	2.34386	0.177778	ATP9A//IDE//SNRK//UBE2G2//ORC4//ATP9B//STK35//ETNK1
GO:0032559	adenyl ribonucleotide binding	Molecular function	8	1393	45	22849	2.91604	0.00534753	0.550746	2.27185	0.177778	ATP9A//IDE//SNRK//UBE2G2//ORC4//ATP9B//STK35//ETNK1
GO:0000287	magnesium ion binding	Molecular function	3	180	45	22849	8.46259	0.00535153	0.550746	2.27152	0.0666667	ATP9A//SNRK//ATP9B
GO:0030554	adenyl nucleotide binding	Molecular function	8	1401	45	22849	2.89939	0.00553319	0.550746	2.25702	0.177778	ATP9A//IDE//SNRK//UBE2G2//ORC4//ATP9B//STK35//ETNK1
GO:1901363	heterocyclic compound binding	Molecular function	18	5154	45	22849	1.7733	0.00645653	0.550746	2.19	0.4	REV3L//RBM33//THAP4//HIF1A//SMAD4//SATB2//ORC4//HUWE1//TDRD3//MORC3//ATP9A//IDE//SNRK//UBE2G2//ATP9B//STK35//ETNK1//RPN1
GO:0070011	peptidase activity, acting on L-amino acid peptides	Molecular function	5	627	45	22849	4.04909	0.00756445	0.550746	2.12122	0.111111	PAPPA//RHBDD1//USP12//IDE//TASP1
GO:0097159	organic cyclic compound binding	Molecular function	18	5234	45	22849	1.7462	0.00763365	0.550746	2.11727	0.4	REV3L//RBM33//THAP4//HIF1A//SMAD4//SATB2//ORC4//HUWE1//TDRD3//MORC3//ATP9A//IDE//SNRK//UBE2G2//ATP9B//STK35//ETNK1//RPN1
GO:0000166	nucleotide binding	Molecular function	10	2139	45	22849	2.3738	0.00764563	0.550746	2.11659	0.222222	ATP9A//IDE//SNRK//UBE2G2//ORC4//ATP9B//STK35//ETNK1//REV3L//RBM33
GO:1901265	nucleoside phosphate binding	Molecular function	10	2139	45	22849	2.3738	0.00764563	0.550746	2.11659	0.222222	ATP9A//IDE//REV3L//SNRK//UBE2G2//ORC4//RBM33//ATP9B//STK35//ETNK1
GO:0004527	exonuclease activity	Molecular function	2	67	45	22849	15.1569	0.00773106	0.550746	2.11176	0.0444444	REV3L//CNOT6L
GO:0008233	peptidase activity	Molecular function	5	641	45	22849	3.96065	0.00828058	0.563079	2.08194	0.111111	PAPPA//RHBDD1//USP12//IDE//TASP1
GO:0000989	transcription factor activity, transcription factor binding	Molecular function	4	457	45	22849	4.44425	0.0123273	0.713473	1.90913	0.0888889	HIF1A//SMAD4//TDRD3//CDYL
GO:0000988	transcription factor activity, protein binding	Molecular function	4	461	45	22849	4.40569	0.0126939	0.713473	1.89641	0.0888889	HIF1A//SMAD4//TDRD3//CDYL
GO:0031625	ubiquitin protein ligase binding	Molecular function	3	250	45	22849	6.09307	0.0130956	0.713473	1.88288	0.0666667	HIF1A//UBE2G2//STX8
GO:0044389	ubiquitin-like protein ligase binding	Molecular function	3	254	45	22849	5.99711	0.0136625	0.713473	1.86447	0.0666667	HIF1A//UBE2G2//STX8
GO:0035639	purine ribonucleoside triphosphate binding	Molecular function	8	1662	45	22849	2.44407	0.014809	0.713473	1.82947	0.177778	ATP9A//IDE//SNRK//UBE2G2//ORC4//ATP9B//STK35//ETNK1
GO:0003682	chromatin binding	Molecular function	4	487	45	22849	4.17048	0.0152481	0.713473	1.81678	0.0888889	SMAD4//STAG1//SATB2//TDRD3
GO:0032550	purine ribonucleoside binding	Molecular function	8	1676	45	22849	2.42365	0.0155147	0.713473	1.80926	0.177778	ATP9A//IDE//SNRK//UBE2G2//ORC4//ATP9B//STK35//ETNK1
GO:0032549	ribonucleoside binding	Molecular function	8	1678	45	22849	2.42077	0.0156175	0.713473	1.80639	0.177778	ATP9A//IDE//SNRK//UBE2G2//ORC4//ATP9B//STK35//ETNK1
GO:0001883	purine nucleoside binding	Molecular function	8	1679	45	22849	2.41932	0.0156691	0.713473	1.80496	0.177778	ATP9A//IDE//SNRK//UBE2G2//ORC4//ATP9B//STK35//ETNK1
GO:0005319	lipid transporter activity	Molecular function	2	98	45	22849	10.3624	0.0159914	0.713473	1.79611	0.0444444	ATP9A//ATP9B
GO:0001882	nucleoside binding	Molecular function	8	1686	45	22849	2.40928	0.0160337	0.713473	1.79497	0.177778	ATP9A//IDE//SNRK//UBE2G2//ORC4//ATP9B//STK35//ETNK1
GO:0046982	protein heterodimerization activity	Molecular function	4	497	45	22849	4.08656	0.0163112	0.713473	1.78751	0.0888889	HIF1A//SMAD4//TPD52//RALGAPA2
GO:0032555	purine ribonucleotide binding	Molecular function	8	1709	45	22849	2.37685	0.0172758	0.713473	1.76256	0.177778	ATP9A//IDE//SNRK//UBE2G2//ORC4//ATP9B//STK35//ETNK1
GO:0004222	metalloendopeptidase activity	Molecular function	2	103	45	22849	9.85933	0.0175644	0.713473	1.75537	0.0444444	IDE//PAPPA
GO:0017076	purine nucleotide binding	Molecular function	8	1719	45	22849	2.36303	0.0178373	0.713473	1.74867	0.177778	ATP9A//IDE//SNRK//UBE2G2//ORC4//ATP9B//STK35//ETNK1
GO:0032553	ribonucleotide binding	Molecular function	8	1724	45	22849	2.35617	0.018123	0.713473	1.74177	0.177778	ATP9A//IDE//SNRK//UBE2G2//ORC4//ATP9B//STK35//ETNK1
GO:0036094	small molecule binding	Molecular function	10	2456	45	22849	2.06741	0.0191413	0.730224	1.71803	0.222222	ATP9A//IDE//REV3L//SNRK//UBE2G2//ORC4//RBM33//ATP9B//STK35//ETNK1
GO:0031005	filamin binding	Molecular function	1	10	45	22849	50.7756	0.0195247	0.730224	1.70942	0.0222222	SMAD4
GO:0043168	anion binding	Molecular function	10	2491	45	22849	2.03836	0.020945	0.748845	1.67892	0.222222	ARHGAP26//SNX5//ATP9A//IDE//SNRK//UBE2G2//ORC4//ATP9B//STK35//ETNK1
GO:0070411	I-SMAD binding	Molecular function	1	11	45	22849	46.1596	0.0214565	0.748845	1.66844	0.0222222	SMAD4
GO:0044325	ion channel binding	Molecular function	2	117	45	22849	8.67958	0.0223003	0.748845	1.65169	0.0444444	PPP2CA//AKAP6
GO:0043492	ATPase activity, coupled to movement of substances	Molecular function	2	119	45	22849	8.53371	0.0230156	0.748845	1.63798	0.0444444	ATP9A//ATP9B
GO:0004535	poly(A)-specific ribonuclease activity	Molecular function	1	12	45	22849	42.313	0.0233847	0.748845	1.63107	0.0222222	CNOT6L
GO:0043495	protein anchor	Molecular function	1	12	45	22849	42.313	0.0233847	0.748845	1.63107	0.0222222	AKAP6
GO:0016740	transferase activity	Molecular function	9	2167	45	22849	2.10881	0.0235265	0.748845	1.62844	0.2	CDYL//RPN1//SETD2//SNRK//STK35//ETNK1//REV3L//UBE2G2//HUWE1
GO:0008179	adenylate cyclase binding	Molecular function	1	13	45	22849	39.0581	0.0253091	0.757247	1.59672	0.0222222	AKAP6
GO:0048156	tau protein binding	Molecular function	1	13	45	22849	39.0581	0.0253091	0.757247	1.59672	0.0222222	PPP2CA
GO:0050811	GABA receptor binding	Molecular function	1	13	45	22849	39.0581	0.0253091	0.757247	1.59672	0.0222222	PPP2CA
GO:0043422	protein kinase B binding	Molecular function	1	14	45	22849	36.2683	0.0272298	0.776288	1.56496	0.0222222	PPP2CA
GO:0046983	protein dimerization activity	Molecular function	6	1182	45	22849	2.57744	0.0274864	0.776288	1.56088	0.133333	IDE//SMAD4//TPD52//HIF1A//RALGAPA2//PPP2CA
GO:0001076	transcription factor activity, RNA polymerase II transcription factor binding	Molecular function	2	131	45	22849	7.75199	0.0275022	0.776288	1.56063	0.0444444	HIF1A//SMAD4
GO:0019903	protein phosphatase binding	Molecular function	2	136	45	22849	7.46699	0.0294676	0.815191	1.53066	0.0444444	PPP2CA//AKAP6
GO:0001228	transcriptional activator activity, RNA polymerase II transcription regulatory region sequence-specific binding	Molecular function	3	348	45	22849	4.3772	0.0310382	0.815191	1.5081	0.0666667	HIF1A//SMAD4//STAG1
GO:0017081	chloride channel regulator activity	Molecular function	1	16	45	22849	31.7347	0.0310601	0.815191	1.5078	0.0222222	STX8
GO:0034237	protein kinase A regulatory subunit binding	Molecular function	1	16	45	22849	31.7347	0.0310601	0.815191	1.5078	0.0222222	AKAP6
GO:0070064	proline-rich region binding	Molecular function	1	19	45	22849	26.724	0.0367779	0.948616	1.43441	0.0222222	GAREM
GO:0017025	TBP-class protein binding	Molecular function	1	20	45	22849	25.3878	0.0386765	0.980678	1.41255	0.0222222	YEATS2
GO:0004298	threonine-type endopeptidase activity	Molecular function	1	21	45	22849	24.1788	0.0405714	0.994998	1.39178	0.0222222	TASP1
GO:0070003	threonine-type peptidase activity	Molecular function	1	21	45	22849	24.1788	0.0405714	0.994998	1.39178	0.0222222	TASP1
GO:0070412	R-SMAD binding	Molecular function	1	23	45	22849	22.0763	0.0443504	1	1.3531	0.0222222	SMAD4
GO:0016887	ATPase activity	Molecular function	3	403	45	22849	3.77982	0.0448155	1	1.34857	0.0666667	ATP9A//ATP9B//IDE
GO:0000175	3'-5'-exoribonuclease activity	Molecular function	1	24	45	22849	21.1565	0.0462344	1	1.33504	0.0222222	CNOT6L
GO:0016896	exoribonuclease activity, producing 5'-phosphomonoesters	Molecular function	1	24	45	22849	21.1565	0.0462344	1	1.33504	0.0222222	CNOT6L
GO:0008237	metallopeptidase activity	Molecular function	2	175	45	22849	5.80292	0.0465815	1	1.33179	0.0444444	IDE//PAPPA
GO:0004532	exoribonuclease activity	Molecular function	1	25	45	22849	20.3102	0.0481147	1	1.31772	0.0222222	CNOT6L
GO:0016799	hydrolase activity, hydrolyzing N-glycosyl compounds	Molecular function	1	25	45	22849	20.3102	0.0481147	1	1.31772	0.0222222	MAN2A1
GO:0097367	carbohydrate derivative binding	Molecular function	8	2080	45	22849	1.95291	0.0481726	1	1.3172	0.177778	IDE//ATP9A//SNRK//UBE2G2//ORC4//ATP9B//STK35//ETNK1
GO:0019902	phosphatase binding	Molecular function	2	180	45	22849	5.64173	0.0489878	1	1.30991	0.0444444	PPP2CA//AKAP6

## Sheet: down DSS+5-ASA vs Control
Supplementary Table 3. The complete results of the GO enrichment analysis.
#Column "GO.ID" stands for the ID of gene ontology term
#Column "Term" stands for the name of gene ontology term
#Column "Ontology" stands for the ontology of GOID belongs to
#Column "Count" stands for the number of DE genes associated with the listed GOID
#Column "Pop.Hits" stands for the number of background population genes associated with the listed GOID
#Column "List.Total" stands for the total number of DE genes
#Column "Pop.Total" stands for the total number of background population genes
#Column "Fold.Enrichment" stands for the Fold Enrichment value of the GOID, it equals (Count/Pop.Hits)/(List.Total/Pop.Total)
#Column "Pvalue" stands for the significance testing value of the GOID
#Column "FDR" stands for the false discovery rate of the GOID, using Benjamini & Hochberg (1995) method
#Column "Enrichment.Score" stands for the Enrichment Score value of the GOID, it equals (-log10(Pvalue))
#Column "Gene.Ratio" stands for the Gene Ratio value genes associated with the GOID, it equals (Count/List.Total)
#Column "GENES" stands for the DE genes associated with the GOID
GO.ID	Term	Ontology	Count	Pop.Hits	List.Total	Pop.Total	Fold.Enrichment	Pvalue	FDR	Enrichment.Score	Gene.Ratio	GENES
GO:0003231	cardiac ventricle development	Biological process	4	129	34	23276	21.2275	3.67079e-05	0.128312	4.43524	0.117647	GRHL2//FRS2//PKP2//MYOCD
GO:0048513	animal organ development	Biological process	14	3094	34	23276	3.09768	5.30845e-05	0.128312	4.27503	0.411765	FRS2//MAN2A1//BIRC6//CHSY1//GRHL2//MYOCD//GAB1//PKP2//NFIX//CBFB//LRIG3//RIPK2//ANO1//KMT2C
GO:0060711	labyrinthine layer development	Biological process	3	53	34	23276	38.7503	6.34578e-05	0.128312	4.19751	0.0882353	GRHL2//BIRC6//GAB1
GO:0003205	cardiac chamber development	Biological process	4	169	34	23276	16.2033	0.000104931	0.159127	3.9791	0.117647	GRHL2//MYOCD//FRS2//PKP2
GO:0048856	anatomical structure development	Biological process	17	4984	34	23276	2.33507	0.00021361	0.258551	3.67038	0.5	MYOCD//MAN2A1//GRHL2//FRS2//BIRC6//CHSY1//GAB1//PKP2//BBS9//NFIX//CBFB//LRIG3//FAM126A//RIPK2//SPECC1L//ANO1//KMT2C
GO:0048608	reproductive structure development	Biological process	5	407	34	23276	8.41017	0.000292239	0.258551	3.53426	0.147059	BIRC6//MYOCD//FRS2//GRHL2//GAB1
GO:0061458	reproductive system development	Biological process	5	412	34	23276	8.30811	0.000309116	0.258551	3.50988	0.147059	BIRC6//MYOCD//FRS2//GRHL2//GAB1
GO:0048731	system development	Biological process	15	4164	34	23276	2.4661	0.000355924	0.258551	3.44864	0.441176	MYOCD//FRS2//GRHL2//MAN2A1//BIRC6//CHSY1//GAB1//PKP2//NFIX//CBFB//LRIG3//FAM126A//RIPK2//ANO1//KMT2C
GO:0060541	respiratory system development	Biological process	4	241	34	23276	11.3625	0.000407266	0.258551	3.39012	0.117647	MAN2A1//MYOCD//ANO1//GRHL2
GO:0001892	embryonic placenta development	Biological process	3	105	34	23276	19.5597	0.000482148	0.258551	3.31682	0.0882353	GRHL2//BIRC6//GAB1
GO:0043412	macromolecule modification	Biological process	13	3338	34	23276	2.66616	0.000509828	0.258551	3.29258	0.382353	GAB1//FRS2//CBFB//BIRC6//DYRK1A//RIPK2//ILKAP//MAN2A1//KMT2C//MYOCD//EP400//KANSL1//GRHL2
GO:0048568	embryonic organ development	Biological process	5	460	34	23276	7.44118	0.000511477	0.258551	3.29117	0.147059	LRIG3//FRS2//GRHL2//BIRC6//GAB1
GO:0043954	cellular component maintenance	Biological process	2	26	34	23276	52.6606	0.000658459	0.307247	3.18147	0.0588235	PKP2//MYOCD
GO:0044767	single-organism developmental process	Biological process	17	5539	34	23276	2.1011	0.000800205	0.313814	3.0968	0.5	MYOCD//CBFB//MAN2A1//GRHL2//FRS2//BIRC6//CHSY1//ANO1//LRIG3//GAB1//PKP2//BBS9//NFIX//KMT2C//FAM126A//RIPK2//SPECC1L
GO:0032502	developmental process	Biological process	17	5585	34	23276	2.0838	0.00088502	0.313814	3.05305	0.5	MYOCD//CBFB//MAN2A1//GRHL2//FRS2//BIRC6//CHSY1//ANO1//LRIG3//GAB1//PKP2//BBS9//NFIX//KMT2C//FAM126A//RIPK2//SPECC1L
GO:0018205	peptidyl-lysine modification	Biological process	4	301	34	23276	9.09752	0.000936331	0.313814	3.02857	0.117647	MYOCD//EP400//KANSL1//KMT2C
GO:0016573	histone acetylation	Biological process	3	139	34	23276	14.7753	0.00108902	0.313814	2.96297	0.0882353	MYOCD//EP400//KANSL1
GO:0007507	heart development	Biological process	5	547	34	23276	6.25766	0.00111464	0.313814	2.95287	0.147059	GRHL2//MYOCD//FRS2//PKP2//GAB1
GO:0043010	camera-type eye development	Biological process	4	318	34	23276	8.61117	0.00114747	0.313814	2.94026	0.117647	FRS2//MAN2A1//KMT2C//GRHL2
GO:0070830	bicellular tight junction assembly	Biological process	2	35	34	23276	39.1193	0.0011956	0.313814	2.92241	0.0588235	PKP2//GRHL2
GO:0018393	internal peptidyl-lysine acetylation	Biological process	3	144	34	23276	14.2623	0.00120572	0.313814	2.91875	0.0882353	MYOCD//EP400//KANSL1
GO:0007423	sensory organ development	Biological process	5	558	34	23276	6.1343	0.00121773	0.313814	2.91445	0.147059	FRS2//LRIG3//GRHL2//MAN2A1//KMT2C
GO:0006464	cellular protein modification process	Biological process	12	3203	34	23276	2.5648	0.00130396	0.313814	2.88473	0.352941	GAB1//FRS2//CBFB//BIRC6//DYRK1A//RIPK2//ILKAP//MAN2A1//KMT2C//MYOCD//EP400//KANSL1
GO:0036211	protein modification process	Biological process	12	3203	34	23276	2.5648	0.00130396	0.313814	2.88473	0.352941	GAB1//FRS2//CBFB//BIRC6//DYRK1A//RIPK2//ILKAP//MAN2A1//KMT2C//MYOCD//EP400//KANSL1
GO:0006475	internal protein amino acid acetylation	Biological process	3	150	34	23276	13.6918	0.00135584	0.313814	2.86779	0.0882353	MYOCD//EP400//KANSL1
GO:0018394	peptidyl-lysine acetylation	Biological process	3	151	34	23276	13.6011	0.00138195	0.313814	2.85951	0.0882353	MYOCD//EP400//KANSL1
GO:0007275	multicellular organism development	Biological process	15	4716	34	23276	2.17744	0.0013968	0.313814	2.85487	0.441176	MYOCD//MAN2A1//GRHL2//FRS2//BIRC6//CHSY1//GAB1//PKP2//NFIX//CBFB//LRIG3//FAM126A//RIPK2//ANO1//KMT2C
GO:0001890	placenta development	Biological process	3	155	34	23276	13.2501	0.00148954	0.322699	2.82695	0.0882353	GRHL2//BIRC6//GAB1
GO:0043297	apical junction assembly	Biological process	2	43	34	23276	31.8413	0.00180128	0.376778	2.74442	0.0588235	GRHL2//PKP2
GO:0001654	eye development	Biological process	4	366	34	23276	7.48184	0.00192133	0.388494	2.7164	0.117647	FRS2//GRHL2//MAN2A1//KMT2C
GO:0006473	protein acetylation	Biological process	3	174	34	23276	11.8032	0.0020722	0.405482	2.68357	0.0882353	MYOCD//EP400//KANSL1
GO:0016570	histone modification	Biological process	4	386	34	23276	7.09418	0.00233061	0.428937	2.63253	0.117647	KMT2C//MYOCD//EP400//KANSL1
GO:0044699	single-organism process	Biological process	28	13487	34	23276	1.42126	0.00233349	0.428937	2.63199	0.823529	GAB1//FRS2//CBFB//MYOCD//MAN2A1//GRHL2//BIRC6//RIPK2//CHSY1//PKP2//DAAM1//SPECC1L//MPZL1//KMT2C//CAR8//ANO1//ATP9A//LRIG3//BBS9//NFIX//TC2N//STRN3//ILKAP//FAM126A//DYRK1A//EP400//KANSL1//UBAC2
GO:0009887	organ morphogenesis	Biological process	6	964	34	23276	4.26092	0.00247166	0.440973	2.60701	0.176471	FRS2//GRHL2//LRIG3//PKP2//MAN2A1//CHSY1
GO:0016569	covalent chromatin modification	Biological process	4	396	34	23276	6.91503	0.00255629	0.443041	2.59239	0.117647	KMT2C//MYOCD//EP400//KANSL1
GO:0018193	peptidyl-amino acid modification	Biological process	6	979	34	23276	4.19564	0.00267006	0.449904	2.57348	0.176471	RIPK2//DYRK1A//MYOCD//EP400//KANSL1//KMT2C
GO:0009653	anatomical structure morphogenesis	Biological process	10	2559	34	23276	2.67522	0.00276807	0.453814	2.55782	0.294118	MYOCD//FRS2//GRHL2//BBS9//NFIX//LRIG3//PKP2//MAN2A1//SPECC1L//CHSY1
GO:0048522	positive regulation of cellular process	Biological process	14	4541	34	23276	2.1106	0.00301533	0.464784	2.52066	0.411765	GAB1//FRS2//RIPK2//MYOCD//BIRC6//GRHL2//ANO1//CHSY1//CBFB//NFIX//STRN3//KMT2C//MAN2A1//DYRK1A
GO:0060324	face development	Biological process	2	56	34	23276	24.4496	0.00303568	0.464784	2.51774	0.0588235	SPECC1L//GRHL2
GO:0003006	developmental process involved in reproduction	Biological process	5	691	34	23276	4.95361	0.0030982	0.464784	2.50889	0.147059	BIRC6//MYOCD//FRS2//GRHL2//GAB1
GO:0009888	tissue development	Biological process	8	1761	34	23276	3.11	0.00323847	0.464784	2.48966	0.235294	GRHL2//CHSY1//GAB1//MYOCD//PKP2//MAN2A1//FRS2//BIRC6
GO:0048286	lung alveolus development	Biological process	2	58	34	23276	23.6065	0.00325249	0.464784	2.48778	0.0588235	MAN2A1//MYOCD
GO:0043543	protein acylation	Biological process	3	205	34	23276	10.0184	0.00329471	0.464784	2.48218	0.0882353	MYOCD//EP400//KANSL1
GO:0044707	single-multicellular organism process	Biological process	16	5687	34	23276	1.92604	0.00338368	0.466487	2.47061	0.470588	CBFB//MYOCD//MAN2A1//GRHL2//FRS2//BIRC6//CHSY1//ANO1//LRIG3//GAB1//PKP2//NFIX//TC2N//RIPK2//KMT2C//FAM126A
GO:0030324	lung development	Biological process	3	210	34	23276	9.77983	0.00352542	0.472196	2.45279	0.0882353	MAN2A1//MYOCD//GRHL2
GO:0001701	in utero embryonic development	Biological process	4	435	34	23276	6.29506	0.00358078	0.472196	2.44602	0.117647	GRHL2//BIRC6//GAB1//MAN2A1
GO:0030323	respiratory tube development	Biological process	3	213	34	23276	9.64209	0.00366849	0.473469	2.43551	0.0882353	MAN2A1//MYOCD//GRHL2
GO:0043967	histone H4 acetylation	Biological process	2	63	34	23276	21.733	0.00382528	0.48342	2.41734	0.0588235	KANSL1//EP400
GO:0009790	embryo development	Biological process	6	1080	34	23276	3.80327	0.0043365	0.533104	2.36286	0.176471	MAN2A1//GRHL2//FRS2//LRIG3//BIRC6//GAB1
GO:0048583	regulation of response to stimulus	Biological process	11	3202	34	23276	2.3518	0.00445807	0.533104	2.35085	0.323529	GAB1//FRS2//RIPK2//BIRC6//TC2N//MYOCD//STRN3//ANO1//DYRK1A//CHSY1//UBAC2
GO:0003208	cardiac ventricle morphogenesis	Biological process	2	69	34	23276	19.8431	0.00456996	0.533104	2.34009	0.0588235	PKP2//GRHL2
GO:0007043	cell-cell junction assembly	Biological process	2	69	34	23276	19.8431	0.00456996	0.533104	2.34009	0.0588235	PKP2//GRHL2
GO:0044702	single organism reproductive process	Biological process	6	1149	34	23276	3.57487	0.00585508	0.660133	2.23247	0.176471	BIRC6//KMT2C//MYOCD//FRS2//GRHL2//GAB1
GO:0019538	protein metabolic process	Biological process	14	4883	34	23276	1.96278	0.00601184	0.660133	2.22099	0.411765	GAB1//FRS2//CBFB//BIRC6//DYRK1A//RIPK2//ILKAP//MAN2A1//KMT2C//CHSY1//MYOCD//EP400//KANSL1//UBAC2
GO:1902589	single-organism organelle organization	Biological process	9	2387	34	23276	2.58119	0.00601716	0.660133	2.22061	0.264706	DAAM1//SPECC1L//BIRC6//BBS9//KMT2C//MYOCD//EP400//KANSL1//PKP2
GO:0018107	peptidyl-threonine phosphorylation	Biological process	2	80	34	23276	17.1147	0.00609421	0.660133	2.21508	0.0588235	RIPK2//DYRK1A
GO:0018210	peptidyl-threonine modification	Biological process	2	84	34	23276	16.2997	0.00669846	0.712857	2.17403	0.0588235	RIPK2//DYRK1A
GO:0044710	single-organism metabolic process	Biological process	13	4432	34	23276	2.00804	0.00711133	0.743747	2.14805	0.382353	GAB1//FRS2//MAN2A1//CAR8//KMT2C//CHSY1//RIPK2//ILKAP//MYOCD//EP400//KANSL1//FAM126A//UBAC2
GO:0016568	chromatin modification	Biological process	4	547	34	23276	5.00613	0.00800357	0.821337	2.09672	0.117647	KMT2C//MYOCD//EP400//KANSL1
GO:0090596	sensory organ morphogenesis	Biological process	3	284	34	23276	7.23157	0.00813373	0.821337	2.08971	0.0882353	LRIG3//FRS2//MAN2A1
GO:0022414	reproductive process	Biological process	6	1242	34	23276	3.30719	0.00848188	0.821337	2.07151	0.176471	BIRC6//KMT2C//MYOCD//FRS2//GRHL2//GAB1
GO:0000003	reproduction	Biological process	6	1243	34	23276	3.30453	0.00851411	0.821337	2.06986	0.176471	BIRC6//KMT2C//MYOCD//FRS2//GRHL2//GAB1
GO:0006260	DNA replication	Biological process	3	289	34	23276	7.10645	0.00853021	0.821337	2.06904	0.0882353	ILKAP//GRHL2//NFIX
GO:0048518	positive regulation of biological process	Biological process	14	5088	34	23276	1.88369	0.0087725	0.831468	2.05688	0.411765	GAB1//FRS2//RIPK2//MYOCD//BIRC6//GRHL2//ANO1//CHSY1//CBFB//NFIX//STRN3//KMT2C//MAN2A1//DYRK1A
GO:0000187	activation of MAPK activity	Biological process	2	98	34	23276	13.9712	0.0090174	0.83446	2.04492	0.0588235	GAB1//FRS2
GO:0044763	single-organism cellular process	Biological process	25	12142	34	23276	1.40955	0.00907919	0.83446	2.04195	0.735294	GAB1//FRS2//MYOCD//CBFB//RIPK2//CHSY1//PKP2//GRHL2//DAAM1//SPECC1L//BIRC6//MPZL1//KMT2C//MAN2A1//CAR8//ANO1//BBS9//NFIX//STRN3//ILKAP//FAM126A//DYRK1A//EP400//KANSL1//UBAC2
GO:0080135	regulation of cellular response to stress	Biological process	4	573	34	23276	4.77898	0.00938845	0.850005	2.02741	0.117647	GAB1//RIPK2//DYRK1A//UBAC2
GO:0060322	head development	Biological process	4	583	34	23276	4.697	0.00996041	0.875859	2.00172	0.117647	GRHL2//NFIX//FRS2//SPECC1L
GO:0048562	embryonic organ morphogenesis	Biological process	3	306	34	23276	6.71165	0.00996278	0.875859	2.00162	0.0882353	LRIG3//FRS2//GRHL2
GO:0023051	regulation of signaling	Biological process	9	2648	34	23276	2.32677	0.0117055	0.894104	1.93161	0.264706	GAB1//FRS2//RIPK2//BIRC6//MYOCD//STRN3//ANO1//DYRK1A//CHSY1
GO:0060255	regulation of macromolecule metabolic process	Biological process	14	5262	34	23276	1.82141	0.0118605	0.894104	1.9259	0.411765	NFIX//MYOCD//STRN3//GAB1//FRS2//DYRK1A//KMT2C//GRHL2//BIRC6//TC2N//RIPK2//ILKAP//CBFB//UBAC2
GO:0046330	positive regulation of JNK cascade	Biological process	2	114	34	23276	12.0103	0.0120434	0.894104	1.91925	0.0588235	GAB1//RIPK2
GO:0010646	regulation of cell communication	Biological process	9	2690	34	23276	2.29044	0.0129141	0.894104	1.88894	0.264706	GAB1//FRS2//RIPK2//BIRC6//MYOCD//STRN3//ANO1//DYRK1A//CHSY1
GO:0044267	cellular protein metabolic process	Biological process	12	4217	34	23276	1.94808	0.0130059	0.894104	1.88586	0.352941	GAB1//FRS2//CBFB//BIRC6//DYRK1A//RIPK2//ILKAP//MAN2A1//KMT2C//MYOCD//EP400//KANSL1
GO:0010604	positive regulation of macromolecule metabolic process	Biological process	9	2696	34	23276	2.28535	0.0130942	0.894104	1.88292	0.264706	GAB1//FRS2//MYOCD//RIPK2//GRHL2//CBFB//NFIX//STRN3//DYRK1A
GO:0072358	cardiovascular system development	Biological process	5	983	34	23276	3.48214	0.013375	0.894104	1.87371	0.147059	MYOCD//GRHL2//FRS2//GAB1//PKP2
GO:0072359	circulatory system development	Biological process	5	983	34	23276	3.48214	0.013375	0.894104	1.87371	0.147059	MYOCD//GRHL2//FRS2//GAB1//PKP2
GO:0003206	cardiac chamber morphogenesis	Biological process	2	122	34	23276	11.2228	0.0137012	0.894104	1.86324	0.0588235	GRHL2//PKP2
GO:0031325	positive regulation of cellular metabolic process	Biological process	9	2723	34	23276	2.26269	0.0139286	0.894104	1.85609	0.264706	GAB1//FRS2//MYOCD//RIPK2//GRHL2//CBFB//NFIX//STRN3//DYRK1A
GO:0008283	cell proliferation	Biological process	7	1812	34	23276	2.64466	0.0142726	0.894104	1.8455	0.205882	FRS2//BIRC6//MYOCD//PKP2//RIPK2//KMT2C//GRHL2
GO:0048593	camera-type eye morphogenesis	Biological process	2	125	34	23276	10.9534	0.014347	0.894104	1.84324	0.0588235	FRS2//MAN2A1
GO:0032494	response to peptidoglycan	Biological process	1	10	34	23276	68.4588	0.0145145	0.894104	1.8382	0.0294118	RIPK2
GO:0051152	positive regulation of smooth muscle cell differentiation	Biological process	1	10	34	23276	68.4588	0.0145145	0.894104	1.8382	0.0294118	MYOCD
GO:0060379	cardiac muscle cell myoblast differentiation	Biological process	1	10	34	23276	68.4588	0.0145145	0.894104	1.8382	0.0294118	MYOCD
GO:0060900	embryonic camera-type eye formation	Biological process	1	10	34	23276	68.4588	0.0145145	0.894104	1.8382	0.0294118	FRS2
GO:0070423	nucleotide-binding oligomerization domain containing signaling pathway	Biological process	1	10	34	23276	68.4588	0.0145145	0.894104	1.8382	0.0294118	RIPK2
GO:0070431	nucleotide-binding oligomerization domain containing 2 signaling pathway	Biological process	1	10	34	23276	68.4588	0.0145145	0.894104	1.8382	0.0294118	RIPK2
GO:0045893	positive regulation of transcription, DNA-templated	Biological process	6	1399	34	23276	2.93605	0.0147174	0.894104	1.83217	0.176471	MYOCD//CBFB//NFIX//GRHL2//STRN3//RIPK2
GO:1903508	positive regulation of nucleic acid-templated transcription	Biological process	6	1399	34	23276	2.93605	0.0147174	0.894104	1.83217	0.176471	MYOCD//GRHL2//CBFB//NFIX//STRN3//RIPK2
GO:0023056	positive regulation of signaling	Biological process	6	1400	34	23276	2.93395	0.0147653	0.894104	1.83076	0.176471	GAB1//FRS2//RIPK2//MYOCD//ANO1//CHSY1
GO:1902680	positive regulation of RNA biosynthetic process	Biological process	6	1402	34	23276	2.92976	0.0148614	0.894104	1.82794	0.176471	MYOCD//GRHL2//CBFB//NFIX//STRN3//RIPK2
GO:0045944	positive regulation of transcription from RNA polymerase II promoter	Biological process	5	1014	34	23276	3.37568	0.0151299	0.894104	1.82016	0.147059	MYOCD//CBFB//NFIX//GRHL2//STRN3
GO:0048729	tissue morphogenesis	Biological process	4	660	34	23276	4.14902	0.0151376	0.894104	1.81994	0.117647	GRHL2//PKP2//MAN2A1//FRS2
GO:0006996	organelle organization	Biological process	10	3262	34	23276	2.09868	0.0153389	0.894104	1.81421	0.294118	DAAM1//SPECC1L//MAN2A1//BIRC6//BBS9//KMT2C//EP400//KANSL1//MYOCD//PKP2
GO:0010647	positive regulation of cell communication	Biological process	6	1420	34	23276	2.89263	0.0157459	0.894104	1.80283	0.176471	GAB1//FRS2//RIPK2//MYOCD//ANO1//CHSY1
GO:0032874	positive regulation of stress-activated MAPK cascade	Biological process	2	132	34	23276	10.3725	0.0159044	0.894104	1.79848	0.0588235	GAB1//RIPK2
GO:0007351	tripartite regional subdivision	Biological process	1	11	34	23276	62.2353	0.0159546	0.894104	1.79711	0.0294118	FRS2
GO:0008595	anterior/posterior axis specification, embryo	Biological process	1	11	34	23276	62.2353	0.0159546	0.894104	1.79711	0.0294118	FRS2
GO:0021683	cerebellar granular layer morphogenesis	Biological process	1	11	34	23276	62.2353	0.0159546	0.894104	1.79711	0.0294118	NFIX
GO:0033147	negative regulation of intracellular estrogen receptor signaling pathway	Biological process	1	11	34	23276	62.2353	0.0159546	0.894104	1.79711	0.0294118	STRN3
GO:0034134	toll-like receptor 2 signaling pathway	Biological process	1	11	34	23276	62.2353	0.0159546	0.894104	1.79711	0.0294118	RIPK2
GO:0034331	cell junction maintenance	Biological process	1	11	34	23276	62.2353	0.0159546	0.894104	1.79711	0.0294118	PKP2
GO:0035872	nucleotide-binding domain, leucine rich repeat containing receptor signaling pathway	Biological process	1	11	34	23276	62.2353	0.0159546	0.894104	1.79711	0.0294118	RIPK2
GO:0045625	regulation of T-helper 1 cell differentiation	Biological process	1	11	34	23276	62.2353	0.0159546	0.894104	1.79711	0.0294118	RIPK2
GO:0070102	interleukin-6-mediated signaling pathway	Biological process	1	11	34	23276	62.2353	0.0159546	0.894104	1.79711	0.0294118	GAB1
GO:0072537	fibroblast activation	Biological process	1	11	34	23276	62.2353	0.0159546	0.894104	1.79711	0.0294118	MYOCD
GO:0086069	bundle of His cell to Purkinje myocyte communication	Biological process	1	11	34	23276	62.2353	0.0159546	0.894104	1.79711	0.0294118	PKP2
GO:0006937	regulation of muscle contraction	Biological process	2	133	34	23276	10.2946	0.0161325	0.894104	1.7923	0.0588235	MYOCD//PKP2
GO:0070304	positive regulation of stress-activated protein kinase signaling cascade	Biological process	2	133	34	23276	10.2946	0.0161325	0.894104	1.7923	0.0588235	GAB1//RIPK2
GO:0006325	chromatin organization	Biological process	4	677	34	23276	4.04483	0.0164733	0.894104	1.78322	0.117647	KMT2C//EP400//KANSL1//MYOCD
GO:0009966	regulation of signal transduction	Biological process	8	2322	34	23276	2.35862	0.0165633	0.894104	1.78085	0.235294	GAB1//FRS2//RIPK2//MYOCD//STRN3//DYRK1A//CHSY1//BIRC6
GO:0090002	establishment of protein localization to plasma membrane	Biological process	2	138	34	23276	9.92157	0.0172945	0.894104	1.76209	0.0588235	PKP2//FAM126A
GO:0051254	positive regulation of RNA metabolic process	Biological process	6	1450	34	23276	2.83278	0.0173015	0.894104	1.76192	0.176471	MYOCD//GRHL2//CBFB//NFIX//STRN3//RIPK2
GO:0006517	protein deglycosylation	Biological process	1	12	34	23276	57.049	0.0173927	0.894104	1.75963	0.0294118	MAN2A1
GO:0033083	regulation of immature T cell proliferation	Biological process	1	12	34	23276	57.049	0.0173927	0.894104	1.75963	0.0294118	RIPK2
GO:0060525	prostate glandular acinus development	Biological process	1	12	34	23276	57.049	0.0173927	0.894104	1.75963	0.0294118	FRS2
GO:1904152	regulation of retrograde protein transport, ER to cytosol	Biological process	1	12	34	23276	57.049	0.0173927	0.894104	1.75963	0.0294118	UBAC2
GO:1904293	negative regulation of ERAD pathway	Biological process	1	12	34	23276	57.049	0.0173927	0.894104	1.75963	0.0294118	UBAC2
GO:0043009	chordate embryonic development	Biological process	4	700	34	23276	3.91193	0.0183962	0.899334	1.73527	0.117647	MAN2A1//GRHL2//BIRC6//GAB1
GO:0042127	regulation of cell proliferation	Biological process	6	1474	34	23276	2.78665	0.0186211	0.899334	1.72999	0.176471	BIRC6//MYOCD//PKP2//RIPK2//KMT2C//FRS2
GO:0033079	immature T cell proliferation	Biological process	1	13	34	23276	52.6606	0.0188288	0.899334	1.72518	0.0294118	RIPK2
GO:0043518	negative regulation of DNA damage response, signal transduction by p53 class mediator	Biological process	1	13	34	23276	52.6606	0.0188288	0.899334	1.72518	0.0294118	DYRK1A
GO:0050961	detection of temperature stimulus involved in sensory perception	Biological process	1	13	34	23276	52.6606	0.0188288	0.899334	1.72518	0.0294118	ANO1
GO:0050965	detection of temperature stimulus involved in sensory perception of pain	Biological process	1	13	34	23276	52.6606	0.0188288	0.899334	1.72518	0.0294118	ANO1
GO:0060670	branching involved in labyrinthine layer morphogenesis	Biological process	1	13	34	23276	52.6606	0.0188288	0.899334	1.72518	0.0294118	GRHL2
GO:0070307	lens fiber cell development	Biological process	1	13	34	23276	52.6606	0.0188288	0.899334	1.72518	0.0294118	FRS2
GO:1901213	regulation of transcription from RNA polymerase II promoter involved in heart development	Biological process	1	13	34	23276	52.6606	0.0188288	0.899334	1.72518	0.0294118	MYOCD
GO:0009792	embryo development ending in birth or egg hatching	Biological process	4	707	34	23276	3.8732	0.0190082	0.900811	1.72106	0.117647	MAN2A1//GRHL2//BIRC6//GAB1
GO:0071900	regulation of protein serine/threonine kinase activity	Biological process	3	394	34	23276	5.2126	0.0195409	0.901375	1.70905	0.0882353	GAB1//FRS2//MYOCD
GO:0034329	cell junction assembly	Biological process	2	149	34	23276	9.1891	0.0199723	0.901375	1.69957	0.0588235	PKP2//GRHL2
GO:0006275	regulation of DNA replication	Biological process	2	150	34	23276	9.12784	0.0202239	0.901375	1.69414	0.0588235	ILKAP//GRHL2
GO:0021681	cerebellar granular layer development	Biological process	1	14	34	23276	48.8992	0.0202628	0.901375	1.6933	0.0294118	NFIX
GO:0045605	negative regulation of epidermal cell differentiation	Biological process	1	14	34	23276	48.8992	0.0202628	0.901375	1.6933	0.0294118	GRHL2
GO:2000810	regulation of bicellular tight junction assembly	Biological process	1	14	34	23276	48.8992	0.0202628	0.901375	1.6933	0.0294118	PKP2
GO:2001015	negative regulation of skeletal muscle cell differentiation	Biological process	1	14	34	23276	48.8992	0.0202628	0.901375	1.6933	0.0294118	MYOCD
GO:0043170	macromolecule metabolic process	Biological process	18	8031	34	23276	1.53438	0.0206399	0.901375	1.68529	0.529412	NFIX//MYOCD//STRN3//GAB1//FRS2//CBFB//DYRK1A//GRHL2//BIRC6//KMT2C//RIPK2//ILKAP//MAN2A1//TC2N//CHSY1//EP400//KANSL1//UBAC2
GO:0007350	blastoderm segmentation	Biological process	1	15	34	23276	45.6392	0.0216948	0.901375	1.66364	0.0294118	FRS2
GO:0010002	cardioblast differentiation	Biological process	1	15	34	23276	45.6392	0.0216948	0.901375	1.66364	0.0294118	MYOCD
GO:0032495	response to muramyl dipeptide	Biological process	1	15	34	23276	45.6392	0.0216948	0.901375	1.66364	0.0294118	RIPK2
GO:0043968	histone H2A acetylation	Biological process	1	15	34	23276	45.6392	0.0216948	0.901375	1.66364	0.0294118	EP400
GO:0043981	histone H4-K5 acetylation	Biological process	1	15	34	23276	45.6392	0.0216948	0.901375	1.66364	0.0294118	KANSL1
GO:0043982	histone H4-K8 acetylation	Biological process	1	15	34	23276	45.6392	0.0216948	0.901375	1.66364	0.0294118	KANSL1
GO:0051923	sulfation	Biological process	1	15	34	23276	45.6392	0.0216948	0.901375	1.66364	0.0294118	CHSY1
GO:0055012	ventricular cardiac muscle cell differentiation	Biological process	1	15	34	23276	45.6392	0.0216948	0.901375	1.66364	0.0294118	MYOCD
GO:0060442	branching involved in prostate gland morphogenesis	Biological process	1	15	34	23276	45.6392	0.0216948	0.901375	1.66364	0.0294118	FRS2
GO:0061029	eyelid development in camera-type eye	Biological process	1	15	34	23276	45.6392	0.0216948	0.901375	1.66364	0.0294118	KMT2C
GO:0046328	regulation of JNK cascade	Biological process	2	157	34	23276	8.72087	0.0220221	0.90875	1.65714	0.0588235	GAB1//RIPK2
GO:0002827	positive regulation of T-helper 1 type immune response	Biological process	1	16	34	23276	42.7868	0.0231248	0.93384	1.63592	0.0294118	RIPK2
GO:0010832	negative regulation of myotube differentiation	Biological process	1	16	34	23276	42.7868	0.0231248	0.93384	1.63592	0.0294118	MYOCD
GO:0048592	eye morphogenesis	Biological process	2	165	34	23276	8.29804	0.0241557	0.93384	1.61698	0.0588235	FRS2//MAN2A1
GO:0016048	detection of temperature stimulus	Biological process	1	17	34	23276	40.2699	0.0245527	0.93384	1.6099	0.0294118	ANO1
GO:0045624	positive regulation of T-helper cell differentiation	Biological process	1	17	34	23276	40.2699	0.0245527	0.93384	1.6099	0.0294118	RIPK2
GO:0050650	chondroitin sulfate proteoglycan biosynthetic process	Biological process	1	17	34	23276	40.2699	0.0245527	0.93384	1.6099	0.0294118	CHSY1
GO:0060712	spongiotrophoblast layer development	Biological process	1	17	34	23276	40.2699	0.0245527	0.93384	1.6099	0.0294118	BIRC6
GO:0060947	cardiac vascular smooth muscle cell differentiation	Biological process	1	17	34	23276	40.2699	0.0245527	0.93384	1.6099	0.0294118	MYOCD
GO:0086019	cell-cell signaling involved in cardiac conduction	Biological process	1	17	34	23276	40.2699	0.0245527	0.93384	1.6099	0.0294118	PKP2
GO:0098901	regulation of cardiac muscle cell action potential	Biological process	1	17	34	23276	40.2699	0.0245527	0.93384	1.6099	0.0294118	PKP2
GO:0043410	positive regulation of MAPK cascade	Biological process	3	434	34	23276	4.73218	0.0251267	0.93384	1.59986	0.0882353	GAB1//FRS2//RIPK2
GO:0043406	positive regulation of MAP kinase activity	Biological process	2	170	34	23276	8.05398	0.0255308	0.93384	1.59294	0.0588235	GAB1//FRS2
GO:0045216	cell-cell junction organization	Biological process	2	170	34	23276	8.05398	0.0255308	0.93384	1.59294	0.0588235	PKP2//GRHL2
GO:0080090	regulation of primary metabolic process	Biological process	13	5177	34	23276	1.71907	0.0255789	0.93384	1.59212	0.382353	NFIX//MYOCD//STRN3//GAB1//FRS2//DYRK1A//KMT2C//GRHL2//BIRC6//RIPK2//ILKAP//CBFB//UBAC2
GO:0045063	T-helper 1 cell differentiation	Biological process	1	18	34	23276	38.0327	0.0259786	0.93384	1.58538	0.0294118	RIPK2
GO:0071704	organic substance metabolic process	Biological process	20	9508	34	23276	1.44003	0.0260068	0.93384	1.58491	0.588235	NFIX//MYOCD//STRN3//GAB1//FRS2//CBFB//DYRK1A//GRHL2//BIRC6//MAN2A1//SRBD1//KMT2C//RIPK2//ILKAP//TC2N//CHSY1//EP400//KANSL1//FAM126A//UBAC2
GO:0008152	metabolic process	Biological process	21	10196	34	23276	1.41	0.026635	0.93384	1.57455	0.617647	NFIX//MYOCD//STRN3//GAB1//FRS2//CBFB//DYRK1A//GRHL2//BIRC6//MAN2A1//SRBD1//KMT2C//RIPK2//ILKAP//CAR8//TC2N//CHSY1//EP400//KANSL1//FAM126A//UBAC2
GO:0080134	regulation of response to stress	Biological process	5	1174	34	23276	2.91562	0.0266852	0.93384	1.57373	0.147059	GAB1//TC2N//RIPK2//DYRK1A//UBAC2
GO:0007254	JNK cascade	Biological process	2	175	34	23276	7.82387	0.0269373	0.93384	1.56965	0.0588235	GAB1//RIPK2
GO:0051338	regulation of transferase activity	Biological process	4	788	34	23276	3.47507	0.0270276	0.93384	1.56819	0.117647	GAB1//FRS2//MYOCD//GRHL2
GO:0010557	positive regulation of macromolecule biosynthetic process	Biological process	6	1605	34	23276	2.55921	0.0270752	0.93384	1.56743	0.176471	MYOCD//GRHL2//CBFB//NFIX//STRN3//RIPK2
GO:0044237	cellular metabolic process	Biological process	19	8893	34	23276	1.46263	0.0273116	0.93384	1.56365	0.558824	NFIX//MYOCD//STRN3//GAB1//FRS2//CBFB//DYRK1A//GRHL2//BIRC6//SRBD1//KMT2C//RIPK2//ILKAP//MAN2A1//CAR8//CHSY1//EP400//KANSL1//FAM126A
GO:0043984	histone H4-K16 acetylation	Biological process	1	19	34	23276	36.031	0.0274025	0.93384	1.56221	0.0294118	KANSL1
GO:0045683	negative regulation of epidermis development	Biological process	1	19	34	23276	36.031	0.0274025	0.93384	1.56221	0.0294118	GRHL2
GO:0050951	sensory perception of temperature stimulus	Biological process	1	19	34	23276	36.031	0.0274025	0.93384	1.56221	0.0294118	ANO1
GO:0051150	regulation of smooth muscle cell differentiation	Biological process	1	19	34	23276	36.031	0.0274025	0.93384	1.56221	0.0294118	MYOCD
GO:0060788	ectodermal placode formation	Biological process	1	19	34	23276	36.031	0.0274025	0.93384	1.56221	0.0294118	FRS2
GO:0070861	regulation of protein exit from endoplasmic reticulum	Biological process	1	19	34	23276	36.031	0.0274025	0.93384	1.56221	0.0294118	UBAC2
GO:0071696	ectodermal placode development	Biological process	1	19	34	23276	36.031	0.0274025	0.93384	1.56221	0.0294118	FRS2
GO:0071697	ectodermal placode morphogenesis	Biological process	1	19	34	23276	36.031	0.0274025	0.93384	1.56221	0.0294118	FRS2
GO:2000727	positive regulation of cardiac muscle cell differentiation	Biological process	1	19	34	23276	36.031	0.0274025	0.93384	1.56221	0.0294118	MYOCD
GO:0033260	nuclear DNA replication	Biological process	1	20	34	23276	34.2294	0.0288244	0.936191	1.54024	0.0294118	ILKAP
GO:0046641	positive regulation of alpha-beta T cell proliferation	Biological process	1	20	34	23276	34.2294	0.0288244	0.936191	1.54024	0.0294118	RIPK2
GO:0086005	ventricular cardiac muscle cell action potential	Biological process	1	20	34	23276	34.2294	0.0288244	0.936191	1.54024	0.0294118	PKP2
GO:0034330	cell junction organization	Biological process	2	185	34	23276	7.40095	0.0298424	0.936191	1.52517	0.0588235	PKP2//GRHL2
GO:0090257	regulation of muscle system process	Biological process	2	186	34	23276	7.36116	0.0301396	0.936191	1.52086	0.0588235	MYOCD//PKP2
GO:0010667	negative regulation of cardiac muscle cell apoptotic process	Biological process	1	21	34	23276	32.5994	0.0302442	0.936191	1.51936	0.0294118	MYOCD
GO:0071354	cellular response to interleukin-6	Biological process	1	21	34	23276	32.5994	0.0302442	0.936191	1.51936	0.0294118	GAB1
GO:0090312	positive regulation of protein deacetylation	Biological process	1	21	34	23276	32.5994	0.0302442	0.936191	1.51936	0.0294118	DYRK1A
GO:0019222	regulation of metabolic process	Biological process	14	5882	34	23276	1.62942	0.030588	0.936191	1.51445	0.411765	NFIX//MYOCD//STRN3//GAB1//FRS2//DYRK1A//KMT2C//GRHL2//BIRC6//TC2N//RIPK2//ILKAP//CBFB//UBAC2
GO:0030522	intracellular receptor signaling pathway	Biological process	2	189	34	23276	7.24432	0.0310382	0.936191	1.5081	0.0588235	STRN3//RIPK2
GO:0032872	regulation of stress-activated MAPK cascade	Biological process	2	189	34	23276	7.24432	0.0310382	0.936191	1.5081	0.0588235	GAB1//RIPK2
GO:0008284	positive regulation of cell proliferation	Biological process	4	825	34	23276	3.31922	0.0312803	0.936191	1.50473	0.117647	RIPK2//KMT2C//BIRC6//MYOCD
GO:0070302	regulation of stress-activated protein kinase signaling cascade	Biological process	2	190	34	23276	7.20619	0.0313401	0.936191	1.5039	0.0588235	GAB1//RIPK2
GO:0045935	positive regulation of nucleobase-containing compound metabolic process	Biological process	6	1661	34	23276	2.47293	0.0313736	0.936191	1.50344	0.176471	MYOCD//GRHL2//CBFB//NFIX//STRN3//RIPK2
GO:0060065	uterus development	Biological process	1	22	34	23276	31.1176	0.031662	0.936191	1.49946	0.0294118	MYOCD
GO:0060438	trachea development	Biological process	1	22	34	23276	31.1176	0.031662	0.936191	1.49946	0.0294118	ANO1
GO:0009967	positive regulation of signal transduction	Biological process	5	1230	34	23276	2.78288	0.0317933	0.936191	1.49766	0.147059	GAB1//FRS2//RIPK2//MYOCD//CHSY1
GO:0009893	positive regulation of metabolic process	Biological process	9	3148	34	23276	1.95721	0.0330328	0.936191	1.48105	0.264706	GAB1//FRS2//MYOCD//RIPK2//GRHL2//CBFB//NFIX//STRN3//DYRK1A
GO:0002825	regulation of T-helper 1 type immune response	Biological process	1	23	34	23276	29.7647	0.0330779	0.936191	1.48046	0.0294118	RIPK2
GO:0030204	chondroitin sulfate metabolic process	Biological process	1	23	34	23276	29.7647	0.0330779	0.936191	1.48046	0.0294118	CHSY1
GO:0030511	positive regulation of transforming growth factor beta receptor signaling pathway	Biological process	1	23	34	23276	29.7647	0.0330779	0.936191	1.48046	0.0294118	MYOCD
GO:0043372	positive regulation of CD4-positive, alpha-beta T cell differentiation	Biological process	1	23	34	23276	29.7647	0.0330779	0.936191	1.48046	0.0294118	RIPK2
GO:0060216	definitive hemopoiesis	Biological process	1	23	34	23276	29.7647	0.0330779	0.936191	1.48046	0.0294118	CBFB
GO:0070741	response to interleukin-6	Biological process	1	23	34	23276	29.7647	0.0330779	0.936191	1.48046	0.0294118	GAB1
GO:0086091	regulation of heart rate by cardiac conduction	Biological process	1	23	34	23276	29.7647	0.0330779	0.936191	1.48046	0.0294118	PKP2
GO:1903846	positive regulation of cellular response to transforming growth factor beta stimulus	Biological process	1	23	34	23276	29.7647	0.0330779	0.936191	1.48046	0.0294118	MYOCD
GO:0044238	primary metabolic process	Biological process	19	9063	34	23276	1.4352	0.0334604	0.936191	1.47547	0.558824	NFIX//MYOCD//STRN3//GAB1//FRS2//CBFB//DYRK1A//GRHL2//BIRC6//MAN2A1//SRBD1//KMT2C//RIPK2//ILKAP//CHSY1//EP400//KANSL1//FAM126A//UBAC2
GO:0035264	multicellular organism growth	Biological process	2	197	34	23276	6.95013	0.0334861	0.936191	1.47514	0.0588235	KMT2C//GRHL2
GO:0051347	positive regulation of transferase activity	Biological process	3	489	34	23276	4.19993	0.0340778	0.936191	1.46753	0.0882353	GAB1//FRS2//GRHL2
GO:0010628	positive regulation of gene expression	Biological process	6	1694	34	23276	2.42475	0.034109	0.936191	1.46713	0.176471	MYOCD//GRHL2//CBFB//NFIX//STRN3//RIPK2
GO:0003298	physiological muscle hypertrophy	Biological process	1	24	34	23276	28.5245	0.0344917	0.936191	1.46229	0.0294118	MYOCD
GO:0003301	physiological cardiac muscle hypertrophy	Biological process	1	24	34	23276	28.5245	0.0344917	0.936191	1.46229	0.0294118	MYOCD
GO:0006491	N-glycan processing	Biological process	1	24	34	23276	28.5245	0.0344917	0.936191	1.46229	0.0294118	MAN2A1
GO:0010664	negative regulation of striated muscle cell apoptotic process	Biological process	1	24	34	23276	28.5245	0.0344917	0.936191	1.46229	0.0294118	MYOCD
GO:0044030	regulation of DNA methylation	Biological process	1	24	34	23276	28.5245	0.0344917	0.936191	1.46229	0.0294118	GRHL2
GO:0045109	intermediate filament organization	Biological process	1	24	34	23276	28.5245	0.0344917	0.936191	1.46229	0.0294118	PKP2
GO:0048642	negative regulation of skeletal muscle tissue development	Biological process	1	24	34	23276	28.5245	0.0344917	0.936191	1.46229	0.0294118	MYOCD
GO:0061049	cell growth involved in cardiac muscle cell development	Biological process	1	24	34	23276	28.5245	0.0344917	0.936191	1.46229	0.0294118	MYOCD
GO:1901797	negative regulation of signal transduction by p53 class mediator	Biological process	1	24	34	23276	28.5245	0.0344917	0.936191	1.46229	0.0294118	DYRK1A
GO:1904292	regulation of ERAD pathway	Biological process	1	24	34	23276	28.5245	0.0344917	0.936191	1.46229	0.0294118	UBAC2
GO:0051239	regulation of multicellular organismal process	Biological process	8	2660	34	23276	2.05891	0.0345092	0.936191	1.46207	0.235294	FRS2//MYOCD//TC2N//CHSY1//RIPK2//GRHL2//MAN2A1//PKP2
GO:0001759	organ induction	Biological process	1	25	34	23276	27.3835	0.0359035	0.936191	1.44486	0.0294118	FRS2
GO:0002063	chondrocyte development	Biological process	1	25	34	23276	27.3835	0.0359035	0.936191	1.44486	0.0294118	CHSY1
GO:0006890	retrograde vesicle-mediated transport, Golgi to ER	Biological process	1	25	34	23276	27.3835	0.0359035	0.936191	1.44486	0.0294118	ATP9A
GO:0010800	positive regulation of peptidyl-threonine phosphorylation	Biological process	1	25	34	23276	27.3835	0.0359035	0.936191	1.44486	0.0294118	RIPK2
GO:0021533	cell differentiation in hindbrain	Biological process	1	25	34	23276	27.3835	0.0359035	0.936191	1.44486	0.0294118	NFIX
GO:0048025	negative regulation of mRNA splicing, via spliceosome	Biological process	1	25	34	23276	27.3835	0.0359035	0.936191	1.44486	0.0294118	DYRK1A
GO:0060713	labyrinthine layer morphogenesis	Biological process	1	25	34	23276	27.3835	0.0359035	0.936191	1.44486	0.0294118	GRHL2
GO:0051091	positive regulation of sequence-specific DNA binding transcription factor activity	Biological process	2	205	34	23276	6.67891	0.0360077	0.936191	1.44361	0.0588235	RIPK2//MYOCD
GO:0031328	positive regulation of cellular biosynthetic process	Biological process	6	1724	34	23276	2.38256	0.0367291	0.936191	1.43499	0.176471	MYOCD//GRHL2//CBFB//NFIX//STRN3//RIPK2
GO:0044260	cellular macromolecule metabolic process	Biological process	16	7237	34	23276	1.51353	0.0369283	0.936191	1.43264	0.470588	NFIX//MYOCD//STRN3//GAB1//FRS2//CBFB//DYRK1A//GRHL2//BIRC6//KMT2C//RIPK2//ILKAP//MAN2A1//CHSY1//EP400//KANSL1
GO:0048584	positive regulation of response to stimulus	Biological process	6	1730	34	23276	2.37429	0.0372685	0.936191	1.42866	0.176471	GAB1//FRS2//RIPK2//MYOCD//ANO1//CHSY1
GO:0048738	cardiac muscle tissue development	Biological process	2	209	34	23276	6.55108	0.0372954	0.936191	1.42834	0.0588235	MYOCD//PKP2
GO:0002753	cytoplasmic pattern recognition receptor signaling pathway	Biological process	1	26	34	23276	26.3303	0.0373133	0.936191	1.42814	0.0294118	RIPK2
GO:0021697	cerebellar cortex formation	Biological process	1	26	34	23276	26.3303	0.0373133	0.936191	1.42814	0.0294118	NFIX
GO:0035886	vascular smooth muscle cell differentiation	Biological process	1	26	34	23276	26.3303	0.0373133	0.936191	1.42814	0.0294118	MYOCD
GO:0045616	regulation of keratinocyte differentiation	Biological process	1	26	34	23276	26.3303	0.0373133	0.936191	1.42814	0.0294118	GRHL2
GO:0045622	regulation of T-helper cell differentiation	Biological process	1	26	34	23276	26.3303	0.0373133	0.936191	1.42814	0.0294118	RIPK2
GO:0046854	phosphatidylinositol phosphorylation	Biological process	1	26	34	23276	26.3303	0.0373133	0.936191	1.42814	0.0294118	FAM126A
GO:0070306	lens fiber cell differentiation	Biological process	1	26	34	23276	26.3303	0.0373133	0.936191	1.42814	0.0294118	FRS2
GO:2000516	positive regulation of CD4-positive, alpha-beta T cell activation	Biological process	1	26	34	23276	26.3303	0.0373133	0.936191	1.42814	0.0294118	RIPK2
GO:2001014	regulation of skeletal muscle cell differentiation	Biological process	1	26	34	23276	26.3303	0.0373133	0.936191	1.42814	0.0294118	MYOCD
GO:0051403	stress-activated MAPK cascade	Biological process	2	213	34	23276	6.42806	0.0386009	0.936191	1.4134	0.0588235	GAB1//RIPK2
GO:0072659	protein localization to plasma membrane	Biological process	2	213	34	23276	6.42806	0.0386009	0.936191	1.4134	0.0588235	PKP2//FAM126A
GO:0044093	positive regulation of molecular function	Biological process	5	1297	34	23276	2.63912	0.0386768	0.936191	1.41255	0.147059	GAB1//FRS2//MYOCD//RIPK2//GRHL2
GO:0001961	positive regulation of cytokine-mediated signaling pathway	Biological process	1	27	34	23276	25.3551	0.0387211	0.936191	1.41205	0.0294118	RIPK2
GO:0030970	retrograde protein transport, ER to cytosol	Biological process	1	27	34	23276	25.3551	0.0387211	0.936191	1.41205	0.0294118	UBAC2
GO:0048596	embryonic camera-type eye morphogenesis	Biological process	1	27	34	23276	25.3551	0.0387211	0.936191	1.41205	0.0294118	FRS2
GO:0086065	cell communication involved in cardiac conduction	Biological process	1	27	34	23276	25.3551	0.0387211	0.936191	1.41205	0.0294118	PKP2
GO:0061138	morphogenesis of a branching epithelium	Biological process	2	214	34	23276	6.39802	0.03893	0.936191	1.40972	0.0588235	FRS2//GRHL2
GO:1990778	protein localization to cell periphery	Biological process	2	215	34	23276	6.36826	0.0392601	0.936191	1.40605	0.0588235	PKP2//FAM126A
GO:0051173	positive regulation of nitrogen compound metabolic process	Biological process	6	1752	34	23276	2.34448	0.039291	0.936191	1.40571	0.176471	MYOCD//GRHL2//CBFB//NFIX//STRN3//RIPK2
GO:0009891	positive regulation of biosynthetic process	Biological process	6	1758	34	23276	2.33648	0.0398547	0.936191	1.39952	0.176471	MYOCD//GRHL2//CBFB//NFIX//STRN3//RIPK2
GO:0043516	regulation of DNA damage response, signal transduction by p53 class mediator	Biological process	1	28	34	23276	24.4496	0.0401269	0.936191	1.39656	0.0294118	DYRK1A
GO:0045880	positive regulation of smoothened signaling pathway	Biological process	1	28	34	23276	24.4496	0.0401269	0.936191	1.39656	0.0294118	CHSY1
GO:0046640	regulation of alpha-beta T cell proliferation	Biological process	1	28	34	23276	24.4496	0.0401269	0.936191	1.39656	0.0294118	RIPK2
GO:0050654	chondroitin sulfate proteoglycan metabolic process	Biological process	1	28	34	23276	24.4496	0.0401269	0.936191	1.39656	0.0294118	CHSY1
GO:0051154	negative regulation of striated muscle cell differentiation	Biological process	1	28	34	23276	24.4496	0.0401269	0.936191	1.39656	0.0294118	MYOCD
GO:0051973	positive regulation of telomerase activity	Biological process	1	28	34	23276	24.4496	0.0401269	0.936191	1.39656	0.0294118	GRHL2
GO:0060760	positive regulation of response to cytokine stimulus	Biological process	1	28	34	23276	24.4496	0.0401269	0.936191	1.39656	0.0294118	RIPK2
GO:0086002	cardiac muscle cell action potential involved in contraction	Biological process	1	28	34	23276	24.4496	0.0401269	0.936191	1.39656	0.0294118	PKP2
GO:0086004	regulation of cardiac muscle cell contraction	Biological process	1	28	34	23276	24.4496	0.0401269	0.936191	1.39656	0.0294118	PKP2
GO:0007026	negative regulation of microtubule depolymerization	Biological process	1	29	34	23276	23.6065	0.0415307	0.94278	1.38163	0.0294118	SPECC1L
GO:0007257	activation of JUN kinase activity	Biological process	1	29	34	23276	23.6065	0.0415307	0.94278	1.38163	0.0294118	GAB1
GO:0034142	toll-like receptor 4 signaling pathway	Biological process	1	29	34	23276	23.6065	0.0415307	0.94278	1.38163	0.0294118	RIPK2
GO:0044786	cell cycle DNA replication	Biological process	1	29	34	23276	23.6065	0.0415307	0.94278	1.38163	0.0294118	ILKAP
GO:0045736	negative regulation of cyclin-dependent protein serine/threonine kinase activity	Biological process	1	29	34	23276	23.6065	0.0415307	0.94278	1.38163	0.0294118	MYOCD
GO:0060669	embryonic placenta morphogenesis	Biological process	1	29	34	23276	23.6065	0.0415307	0.94278	1.38163	0.0294118	GRHL2
GO:2000725	regulation of cardiac muscle cell differentiation	Biological process	1	29	34	23276	23.6065	0.0415307	0.94278	1.38163	0.0294118	MYOCD
GO:0032501	multicellular organismal process	Biological process	16	7336	34	23276	1.4931	0.0416526	0.94278	1.38036	0.470588	CBFB//MYOCD//MAN2A1//GRHL2//FRS2//BIRC6//CHSY1//ANO1//LRIG3//GAB1//PKP2//NFIX//TC2N//RIPK2//KMT2C//FAM126A
GO:0033119	negative regulation of RNA splicing	Biological process	1	30	34	23276	22.8196	0.0429325	0.943513	1.36721	0.0294118	DYRK1A
GO:0033146	regulation of intracellular estrogen receptor signaling pathway	Biological process	1	30	34	23276	22.8196	0.0429325	0.943513	1.36721	0.0294118	STRN3
GO:0046834	lipid phosphorylation	Biological process	1	30	34	23276	22.8196	0.0429325	0.943513	1.36721	0.0294118	FAM126A
GO:0061512	protein localization to cilium	Biological process	1	30	34	23276	22.8196	0.0429325	0.943513	1.36721	0.0294118	BBS9
GO:0090329	regulation of DNA-dependent DNA replication	Biological process	1	30	34	23276	22.8196	0.0429325	0.943513	1.36721	0.0294118	ILKAP
GO:0048705	skeletal system morphogenesis	Biological process	2	227	34	23276	6.03161	0.0433057	0.943513	1.36345	0.0588235	GRHL2//CHSY1
GO:0007420	brain development	Biological process	3	540	34	23276	3.80327	0.0436796	0.943513	1.35972	0.0882353	NFIX//FRS2//GRHL2
GO:0050789	regulation of biological process	Biological process	21	10638	34	23276	1.35142	0.043858	0.943513	1.35795	0.617647	NFIX//MYOCD//STRN3//GAB1//FRS2//DYRK1A//RIPK2//MPZL1//KMT2C//GRHL2//SPECC1L//ANO1//BIRC6//PKP2//TC2N//CHSY1//ILKAP//CBFB//CAR8//MAN2A1//UBAC2
GO:0001763	morphogenesis of a branching structure	Biological process	2	229	34	23276	5.97894	0.0439947	0.943513	1.3566	0.0588235	FRS2//GRHL2
GO:0002064	epithelial cell development	Biological process	2	229	34	23276	5.97894	0.0439947	0.943513	1.3566	0.0588235	GRHL2//FRS2
GO:0032147	activation of protein kinase activity	Biological process	2	229	34	23276	5.97894	0.0439947	0.943513	1.3566	0.0588235	GAB1//FRS2
GO:0000381	regulation of alternative mRNA splicing, via spliceosome	Biological process	1	31	34	23276	22.0835	0.0443323	0.943513	1.35328	0.0294118	DYRK1A
GO:0009954	proximal/distal pattern formation	Biological process	1	31	34	23276	22.0835	0.0443323	0.943513	1.35328	0.0294118	CHSY1
GO:0021680	cerebellar Purkinje cell layer development	Biological process	1	31	34	23276	22.0835	0.0443323	0.943513	1.35328	0.0294118	NFIX
GO:0031114	regulation of microtubule depolymerization	Biological process	1	31	34	23276	22.0835	0.0443323	0.943513	1.35328	0.0294118	SPECC1L
GO:0032743	positive regulation of interleukin-2 production	Biological process	1	31	34	23276	22.0835	0.0443323	0.943513	1.35328	0.0294118	RIPK2
GO:0035774	positive regulation of insulin secretion involved in cellular response to glucose stimulus	Biological process	1	31	34	23276	22.0835	0.0443323	0.943513	1.35328	0.0294118	ANO1
GO:0016567	protein ubiquitination	Biological process	3	544	34	23276	3.7753	0.0444848	0.943513	1.35179	0.0882353	CBFB//RIPK2//BIRC6
GO:0071310	cellular response to organic substance	Biological process	6	1815	34	23276	2.2631	0.0454746	0.953262	1.34223	0.176471	RIPK2//FRS2//MYOCD//STRN3//ANO1//GAB1
GO:0033144	negative regulation of intracellular steroid hormone receptor signaling pathway	Biological process	1	32	34	23276	21.3934	0.0457302	0.953262	1.3398	0.0294118	STRN3
GO:0048048	embryonic eye morphogenesis	Biological process	1	32	34	23276	21.3934	0.0457302	0.953262	1.3398	0.0294118	FRS2
GO:0060487	lung epithelial cell differentiation	Biological process	1	32	34	23276	21.3934	0.0457302	0.953262	1.3398	0.0294118	GRHL2
GO:0060706	cell differentiation involved in embryonic placenta development	Biological process	1	32	34	23276	21.3934	0.0457302	0.953262	1.3398	0.0294118	GRHL2
GO:0045987	positive regulation of smooth muscle contraction	Biological process	1	33	34	23276	20.7451	0.047126	0.960468	1.32674	0.0294118	MYOCD
GO:0046633	alpha-beta T cell proliferation	Biological process	1	33	34	23276	20.7451	0.047126	0.960468	1.32674	0.0294118	RIPK2
GO:0060479	lung cell differentiation	Biological process	1	33	34	23276	20.7451	0.047126	0.960468	1.32674	0.0294118	GRHL2
GO:0060740	prostate gland epithelium morphogenesis	Biological process	1	33	34	23276	20.7451	0.047126	0.960468	1.32674	0.0294118	FRS2
GO:1903115	regulation of actin filament-based movement	Biological process	1	33	34	23276	20.7451	0.047126	0.960468	1.32674	0.0294118	PKP2
GO:0043414	macromolecule methylation	Biological process	2	238	34	23276	5.75284	0.0471457	0.960468	1.32656	0.0588235	KMT2C//GRHL2
GO:0003007	heart morphogenesis	Biological process	2	239	34	23276	5.72877	0.0475009	0.960468	1.3233	0.0588235	GRHL2//PKP2
GO:0070372	regulation of ERK1 and ERK2 cascade	Biological process	2	239	34	23276	5.72877	0.0475009	0.960468	1.3233	0.0588235	RIPK2//FRS2
GO:0090150	establishment of protein localization to membrane	Biological process	2	239	34	23276	5.72877	0.0475009	0.960468	1.3233	0.0588235	PKP2//FAM126A
GO:0001702	gastrulation with mouth forming second	Biological process	1	34	34	23276	20.1349	0.0485199	0.961835	1.31408	0.0294118	FRS2
GO:0006730	one-carbon metabolic process	Biological process	1	34	34	23276	20.1349	0.0485199	0.961835	1.31408	0.0294118	CAR8
GO:0010092	specification of organ identity	Biological process	1	34	34	23276	20.1349	0.0485199	0.961835	1.31408	0.0294118	FRS2
GO:0010665	regulation of cardiac muscle cell apoptotic process	Biological process	1	34	34	23276	20.1349	0.0485199	0.961835	1.31408	0.0294118	MYOCD
GO:0043370	regulation of CD4-positive, alpha-beta T cell differentiation	Biological process	1	34	34	23276	20.1349	0.0485199	0.961835	1.31408	0.0294118	RIPK2
GO:0060512	prostate gland morphogenesis	Biological process	1	34	34	23276	20.1349	0.0485199	0.961835	1.31408	0.0294118	FRS2
GO:0031098	stress-activated protein kinase signaling cascade	Biological process	2	244	34	23276	5.61138	0.0492916	0.973951	1.30723	0.0588235	GAB1//RIPK2
GO:0000578	embryonic axis specification	Biological process	1	35	34	23276	19.5597	0.0499118	0.976661	1.3018	0.0294118	FRS2
GO:0032527	protein exit from endoplasmic reticulum	Biological process	1	35	34	23276	19.5597	0.0499118	0.976661	1.3018	0.0294118	UBAC2
GO:0050686	negative regulation of mRNA processing	Biological process	1	35	34	23276	19.5597	0.0499118	0.976661	1.3018	0.0294118	DYRK1A
GO:0044424	intracellular part	Cellular component	31	12670	36	23196	1.57651	6.30922e-05	0.0304604	4.20002	0.861111	STRN3//DYRK1A//ANO1//BIRC6//CAR8//GAB1//GLCCI1//RIPK2//DAAM1//FAM120A//MTMR12//BBS9//FRS2//ILKAP//SPECC1L//FAM126A//KANSL1//KMT2C//LRIG3//UBAC2//ATP9A//MAN2A1//CHSY1//CBFB//NFIX//MYOCD//GRHL2//TC2N//EP400//PKP2//QRICH1
GO:0005622	intracellular	Cellular component	31	12802	36	23196	1.56025	8.21035e-05	0.0304604	4.08564	0.861111	KANSL1//MAN2A1//STRN3//BBS9//EP400//BIRC6//PKP2//DAAM1//DYRK1A//FAM126A//UBAC2//CBFB//NFIX//MYOCD//FAM120A//KMT2C//GRHL2//TC2N//ANO1//CAR8//GAB1//GLCCI1//RIPK2//MTMR12//FRS2//ILKAP//SPECC1L//QRICH1//ATP9A//CHSY1//LRIG3
GO:0044464	cell part	Cellular component	32	14770	36	23196	1.39598	0.000677866	0.128837	3.16886	0.888889	ANO1//ATP9A//DAAM1//FAM120A//GRHL2//BBS9//LRIG3//FRS2//PKP2//FAM126A//STRN3//CAR8//NFIX//MPZL1//BIRC6//DYRK1A//GAB1//GLCCI1//RIPK2//MTMR12//ILKAP//SPECC1L//KANSL1//KMT2C//UBAC2//CBFB//MYOCD//TC2N//EP400//MAN2A1//CHSY1//QRICH1
GO:0005623	cell	Cellular component	32	14784	36	23196	1.39466	0.00069454	0.128837	3.1583	0.888889	ANO1//ATP9A//DAAM1//FAM120A//GRHL2//BBS9//LRIG3//FRS2//PKP2//FAM126A//STRN3//KANSL1//MAN2A1//CAR8//NFIX//EP400//BIRC6//DYRK1A//UBAC2//MPZL1//CBFB//MYOCD//KMT2C//TC2N//GAB1//GLCCI1//RIPK2//MTMR12//ILKAP//SPECC1L//QRICH1//CHSY1
GO:0005911	cell-cell junction	Cellular component	4	405	36	23196	6.36379	0.00346831	0.463873	2.45988	0.111111	SPECC1L//PKP2//GRHL2//FRS2
GO:0044431	Golgi apparatus part	Cellular component	4	414	36	23196	6.22544	0.003751	0.463873	2.42585	0.111111	MAN2A1//CHSY1//ATP9A//BIRC6
GO:0098791	Golgi subcompartment	Cellular component	3	225	36	23196	8.59111	0.00507867	0.483494	2.29425	0.0833333	ATP9A//BIRC6//CHSY1
GO:0035097	histone methyltransferase complex	Cellular component	2	73	36	23196	17.653	0.00574296	0.483494	2.24086	0.0555556	KANSL1//KMT2C
GO:0031984	organelle subcompartment	Cellular component	3	237	36	23196	8.15612	0.00586448	0.483494	2.23177	0.0833333	ATP9A//BIRC6//CHSY1
GO:0000123	histone acetyltransferase complex	Cellular component	2	84	36	23196	15.3413	0.00753702	0.491725	2.1228	0.0555556	EP400//KANSL1
GO:0034708	methyltransferase complex	Cellular component	2	89	36	23196	14.4794	0.00842574	0.491725	2.07439	0.0555556	KMT2C//KANSL1
GO:0031248	protein acetyltransferase complex	Cellular component	2	94	36	23196	13.7092	0.00935923	0.491725	2.02876	0.0555556	KANSL1//EP400
GO:1902493	acetyltransferase complex	Cellular component	2	94	36	23196	13.7092	0.00935923	0.491725	2.02876	0.0555556	KANSL1//EP400
GO:0005654	nucleoplasm	Cellular component	8	1989	36	23196	2.59159	0.00990171	0.491725	2.00429	0.222222	KANSL1//DYRK1A//EP400//KMT2C//GRHL2//PKP2//QRICH1//STRN3
GO:0016607	nuclear speck	Cellular component	2	97	36	23196	13.2852	0.00994053	0.491725	2.00259	0.0555556	DYRK1A//EP400
GO:0044446	intracellular organelle part	Cellular component	16	5958	36	23196	1.73033	0.0111773	0.518349	1.95166	0.444444	KANSL1//GRHL2//PKP2//QRICH1//STRN3//BIRC6//SPECC1L//MAN2A1//CHSY1//BBS9//ATP9A//DAAM1//EP400//KMT2C//DYRK1A//MYOCD
GO:0044451	nucleoplasm part	Cellular component	4	592	36	23196	4.3536	0.0129592	0.56563	1.88742	0.111111	KANSL1//KMT2C//DYRK1A//EP400
GO:0044422	organelle part	Cellular component	16	6159	36	23196	1.67386	0.0154454	0.636692	1.8112	0.444444	BBS9//MAN2A1//ATP9A//BIRC6//KANSL1//EP400//GRHL2//PKP2//QRICH1//STRN3//KMT2C//DAAM1//SPECC1L//CHSY1//DYRK1A//MYOCD
GO:0032580	Golgi cisterna membrane	Cellular component	1	13	36	23196	49.5641	0.0199942	0.780826	1.6991	0.0277778	CHSY1
GO:0000159	protein phosphatase type 2A complex	Cellular component	1	16	36	23196	40.2708	0.0245528	0.836055	1.6099	0.0277778	STRN3
GO:0000242	pericentriolar material	Cellular component	1	18	36	23196	35.7963	0.0275803	0.836055	1.5594	0.0277778	BBS9
GO:0005802	trans-Golgi network	Cellular component	2	168	36	23196	7.67063	0.0279645	0.836055	1.55339	0.0555556	ATP9A//BIRC6
GO:0035267	NuA4 histone acetyltransferase complex	Cellular component	1	19	36	23196	33.9123	0.0290907	0.836055	1.53625	0.0277778	EP400
GO:0043189	H4/H2A histone acetyltransferase complex	Cellular component	1	19	36	23196	33.9123	0.0290907	0.836055	1.53625	0.0277778	EP400
GO:1902562	H4 histone acetyltransferase complex	Cellular component	1	19	36	23196	33.9123	0.0290907	0.836055	1.53625	0.0277778	EP400
GO:0097346	INO80-type complex	Cellular component	1	20	36	23196	32.2167	0.0305988	0.836055	1.5143	0.0277778	EP400
GO:0005886	plasma membrane	Cellular component	12	4434	36	23196	1.7438	0.0308371	0.836055	1.51093	0.333333	MPZL1//ANO1//ATP9A//DAAM1//FAM120A//GRHL2//BBS9//LRIG3//FRS2//PKP2//FAM126A//STRN3
GO:0030054	cell junction	Cellular component	5	1159	36	23196	2.7797	0.0321635	0.836055	1.49264	0.138889	GRHL2//FRS2//PKP2//SPECC1L//MPZL1
GO:0043229	intracellular organelle	Cellular component	23	10996	36	23196	1.34773	0.034513	0.836055	1.46202	0.638889	LRIG3//UBAC2//CBFB//DYRK1A//NFIX//MYOCD//FAM120A//KMT2C//GRHL2//TC2N//EP400//KANSL1//STRN3//ATP9A//BIRC6//MAN2A1//CHSY1//RIPK2//BBS9//SPECC1L//PKP2//DAAM1//QRICH1
GO:0030057	desmosome	Cellular component	1	23	36	23196	28.0145	0.0351094	0.836055	1.45458	0.0277778	PKP2
GO:0034451	centriolar satellite	Cellular component	1	24	36	23196	26.8472	0.0366083	0.836055	1.43642	0.0277778	BBS9
GO:0071944	cell periphery	Cellular component	12	4546	36	23196	1.70084	0.0367622	0.836055	1.4346	0.333333	ANO1//ATP9A//DAAM1//FAM120A//GRHL2//BBS9//LRIG3//FRS2//PKP2//FAM126A//STRN3//MPZL1
GO:0035869	ciliary transition zone	Cellular component	1	27	36	23196	23.8642	0.0410917	0.836055	1.38625	0.0277778	BBS9
GO:0000139	Golgi membrane	Cellular component	2	211	36	23196	6.10742	0.0423784	0.836055	1.37286	0.0555556	CHSY1//MAN2A1
GO:0031941	filamentous actin	Cellular component	1	28	36	23196	23.0119	0.0425817	0.836055	1.37078	0.0277778	SPECC1L
GO:0044665	MLL1/2 complex	Cellular component	1	28	36	23196	23.0119	0.0425817	0.836055	1.37078	0.0277778	KANSL1
GO:0071339	MLL1 complex	Cellular component	1	28	36	23196	23.0119	0.0425817	0.836055	1.37078	0.0277778	KANSL1
GO:0005794	Golgi apparatus	Cellular component	5	1253	36	23196	2.57116	0.0428168	0.836055	1.36839	0.138889	ATP9A//BIRC6//MAN2A1//CHSY1//STRN3
GO:0044430	cytoskeletal part	Cellular component	5	1284	36	23196	2.50909	0.0467538	0.889521	1.33018	0.138889	BIRC6//PKP2//SPECC1L//BBS9//DAAM1
GO:0005921	gap junction	Cellular component	1	33	36	23196	19.5253	0.0499978	0.905957	1.30105	0.0277778	SPECC1L
GO:0004715	non-membrane spanning protein tyrosine kinase activity	Molecular function	2	45	34	22849	29.868	0.00204408	1	2.6895	0.0588235	DYRK1A//RIPK2
GO:0005488	binding	Molecular function	25	12258	34	22849	1.37059	0.0142129	1	1.84732	0.735294	BIRC6//CAR8//CBFB//DYRK1A//GAB1//GLCCI1//NFIX//DAAM1//MYOCD//KMT2C//BBS9//FRS2//PKP2//EP400//MAN2A1//RIPK2//STRN3//ANO1//ATP9A//ILKAP//GRHL2//SRBD1//FAM120A//CHSY1//TC2N
GO:0045294	alpha-catenin binding	Molecular function	1	10	34	22849	67.2029	0.0147839	1	1.83021	0.0294118	PKP2
GO:0001228	transcriptional activator activity, RNA polymerase II transcription regulatory region sequence-specific binding	Molecular function	3	348	34	22849	5.79336	0.0147847	1	1.83019	0.0882353	MYOCD//NFIX//GRHL2
GO:0004713	protein tyrosine kinase activity	Molecular function	2	131	34	22849	10.26	0.0162335	1	1.78959	0.0588235	DYRK1A//RIPK2
GO:0005229	intracellular calcium activated chloride channel activity	Molecular function	1	11	34	22849	61.0936	0.0162506	1	1.78913	0.0294118	ANO1
GO:0005247	voltage-gated chloride channel activity	Molecular function	1	11	34	22849	61.0936	0.0162506	1	1.78913	0.0294118	ANO1
GO:0001161	intronic transcription regulatory region sequence-specific DNA binding	Molecular function	1	12	34	22849	56.0025	0.0177152	1	1.75165	0.0294118	GRHL2
GO:0044213	intronic transcription regulatory region DNA binding	Molecular function	1	13	34	22849	51.6946	0.0191776	1	1.71721	0.0294118	GRHL2
GO:0048156	tau protein binding	Molecular function	1	13	34	22849	51.6946	0.0191776	1	1.71721	0.0294118	DYRK1A
GO:0070016	armadillo repeat domain binding	Molecular function	1	13	34	22849	51.6946	0.0191776	1	1.71721	0.0294118	STRN3
GO:0004089	carbonate dehydratase activity	Molecular function	1	14	34	22849	48.0021	0.0206379	1	1.68533	0.0294118	CAR8
GO:0019215	intermediate filament binding	Molecular function	1	14	34	22849	48.0021	0.0206379	1	1.68533	0.0294118	PKP2
GO:0005165	neurotrophin receptor binding	Molecular function	1	15	34	22849	44.802	0.0220961	1	1.65568	0.0294118	FRS2
GO:0004012	phospholipid-translocating ATPase activity	Molecular function	1	16	34	22849	42.0018	0.0235523	1	1.62797	0.0294118	ATP9A
GO:0008308	voltage-gated anion channel activity	Molecular function	1	16	34	22849	42.0018	0.0235523	1	1.62797	0.0294118	ANO1
GO:0010485	H4 histone acetyltransferase activity	Molecular function	1	16	34	22849	42.0018	0.0235523	1	1.62797	0.0294118	KANSL1
GO:0042800	histone methyltransferase activity (H3-K4 specific)	Molecular function	1	17	34	22849	39.5311	0.0250063	1	1.60195	0.0294118	KMT2C
GO:0070412	R-SMAD binding	Molecular function	1	23	34	22849	29.2187	0.0336862	1	1.47255	0.0294118	MYOCD
GO:0005104	fibroblast growth factor receptor binding	Molecular function	1	25	34	22849	26.8812	0.0365629	1	1.43696	0.0294118	FRS2
GO:0016799	hydrolase activity, hydrolyzing N-glycosyl compounds	Molecular function	1	25	34	22849	26.8812	0.0365629	1	1.43696	0.0294118	MAN2A1
GO:0005227	calcium activated cation channel activity	Molecular function	1	28	34	22849	24.0011	0.0408622	1	1.38868	0.0294118	ANO1
GO:0005515	protein binding	Molecular function	17	7819	34	22849	1.46112	0.0416942	1	1.37992	0.5	RIPK2//STRN3//ANO1//MYOCD//DYRK1A//DAAM1//PKP2//EP400//FRS2//BIRC6//CAR8//CBFB//GAB1//GLCCI1//NFIX//KMT2C//BBS9
GO:0035035	histone acetyltransferase binding	Molecular function	1	30	34	22849	22.401	0.0437181	1	1.35934	0.0294118	MYOCD
GO:0003713	transcription coactivator activity	Molecular function	2	226	34	22849	5.94716	0.044416	1	1.35246	0.0588235	MYOCD//CBFB
GO:0061631	ubiquitin conjugating enzyme activity	Molecular function	1	31	34	22849	21.6784	0.045143	1	1.34541	0.0294118	BIRC6
GO:0061650	ubiquitin-like protein conjugating enzyme activity	Molecular function	1	32	34	22849	21.0009	0.0465657	1	1.33193	0.0294118	BIRC6
GO:0051721	protein phosphatase 2A binding	Molecular function	1	33	34	22849	20.3645	0.0479865	1	1.31888	0.0294118	STRN3
