# Supplementary material for: circRNA expression profiling of colon tissue from mesalazine-treated mouse of inflammatory bowel disease reveals an important circRNA-miRNA-mRNA pathway
Source: Aging (Albany NY). 2021 Mar 26;13(7):10187–207. doi: 10.18632/aging.202780 (PMC8064189; doi:10.18632/aging.202780)
Supplement: Supplementary Table 4 [file aging-13-202780-s005.xlsx]

## Sheet: Sheet1
Supplementary Table 4. The complete results of the KEGG enrichment analysis .
#Column "PathwayID" stands for Pathway identifiers used in KEGG
#Column "Definition" stands for the definition of the PathwayID
#Column "OriginalWebSite"stands for The map's website,the nodes with red frame and red symbol are associated with the DE genes, green nodes have no significance
#Column "p-value"
"Fisher-Pvalue" stands for the enrichment p-value of the PathwayID used Fisher's exact test
#Column "SelectionCounts" stands for the Count of the DE genes' entities directly associated with the listed PathwayID
#Column "SelectionSize" stands for the total number of the DE genes' entities
#Column "Count" stands for the count of the chosen background population genes' entities associated with the listed PathwayID
#Column "Size" stands for the total number of chosen background population genes' entities
#Column "FDR" stands for the false discovery rate of the PathwayID
#Column "Enrichment_Score" stands for the Enrichment Score value of the PathwayID, it equals "-log10(Pvalue)"
#Column "GeneRatio" stands for the Gene Ratio value of the PathwayID, it equals "SelectionCounts/SelectionSize"
#Column "GENES" stands for the DE genes associated with the PathwayID
PathwayID	Definition	OriginalWebSite	Fisher-Pvalue	SelectionCounts	SelectionSize	Count	Size	FDR	Enrichment_Score	GeneRatio	Genes
mmu04722	Neurotrophin signaling pathway - Mus musculus (mouse)	http://www.genome.jp/kegg-bin/show_pathway?mmu04722+327826+14388+192656	0.000595651	3	11	123	7709	0.172739	3.22501	0.272727	FRS2//GAB1//RIPK2
mmu05205	Proteoglycans in cancer - Mus musculus (mouse)	http://www.genome.jp/kegg-bin/show_pathway?mmu05205+327826+14388	0.0333476	2	11	206	7709	1	1.47694	0.181818	FRS2//GAB1
